# Supplementary material for: A pan-cancer interrogation of intronic polyadenylation and its association with cancer characteristics
Source: bioRxiv preprint, doi:10.1101/2022.11.14.516018, version 1 (2022-11-16)
Supplement: Supplemental Tables [file 516018_file16.xlsx]

## Sheet: S1A
Table S1A. Cancer abbreviation in TCGA cohort
Abbreviation	Study name	# of Tumors	# of normals
ACC	Adrenocortical carcinoma	79	0
BLCA	Bladder Urothelial Carcinoma	408	19
LGG	Brain Lower Grade Glioma	511	0
BRCA	Breast invasive carcinoma	1095	113
CESC	Cervical squamous cell carcinoma and endocervical adenocarcinoma CHOL Cholangiocarcinoma	304	3
CHOL	Cholangiocarcinoma	36	9
COAD	Colon adenocarcinoma	462	41
ESCA	Esophageal carcinoma	161	11
GBM	Glioblastoma multiforme	154	0
HNSC	Head and Neck squamous cell carcinoma	499	44
KICH	Kidney Chromophobe	65	24
KIRC	Kidney renal clear cell carcinoma	532	72
KIRP	Kidney renal papillary cell carcinoma	288	32
LIHC	Liver hepatocellular carcinoma	370	50
LUAD	Lung adenocarcinoma	519	59
LUSC	Lung squamous cell carcinoma	502	49
DLBC	Lymphoid Neoplasm Diffuse Large B-cell Lymphoma	48	0
MESO	Mesothelioma	86	0
OV	Ovarian serous cystadenocarcinoma	373	0
PAAD	Pancreatic adenocarcinoma	177	4
PCPG	Pheochromocytoma and Paraganglioma	178	3
PRAD	Prostate adenocarcinoma	477	48
READ	Rectum adenocarcinoma	166	10
SARC	Sarcoma	259	2
SKCM	Skin Cutaneous Melanoma	103	1
STAD	Stomach adenocarcinoma	375	32
TGCT	Testicular Germ Cell Tumors	150	0
THYM	Thymoma	119	2
THCA	Thyroid carcinoma	501	58
UCS	Uterine Carcinosarcoma	56	0
UCEC	Uterine Corpus Endometrial Carcinoma	546	35
UVM	Uveal Melanoma	80	0

## Sheet: S1B
Table S1B. The number of tumors with matched normals, and the IPAs with significantly different usage in tumor vs. normal
cancer	total_sample_pairs	total_IPA	IPA_w_increasing_usage	IPA_w_decreasing_usage	Fold	Total_dysregulated_IPA
CESC	3	15975	3853	1911	2.01622	5764
PCPG	3	14633	2351	2455	0.957637	4806
SARC	2	15287	2752	1702	1.61692	4454
PAAD	4	15472	2587	1384	1.86922	3971
LUSC	49	17166	2983	890	3.35169	3873
UCEC	23	15620	2373	1305	1.81839	3678
CHOL	9	14731	1719	1895	0.907124	3614
KICH	23	15631	1912	1654	1.15599	3566
BLCA	19	16448	2557	777	3.29086	3334
READ	9	15343	1697	1557	1.08992	3254
ESCA	8	18465	1931	945	2.04339	2876
KIRC	72	15250	863	2008	0.429781	2871
BRCA	112	15624	1919	840	2.28452	2759
COAD	41	15497	1911	797	2.39774	2708
KIRP	31	15093	1322	1380	0.957971	2702
LUAD	57	16248	2095	565	3.70796	2660
STAD	27	18344	1519	985	1.54213	2504
HNSC	42	16137	1662	739	2.24899	2401
THCA	58	14904	876	1514	0.5786	2390
THYM	2	14717	1307	781	1.6735	2088
PRAD	46	15348	998	539	1.85158	1537
LIHC	50	14453	891	629	1.41653	1520

## Sheet: S2A
Table S2A. The number of tumors with matched normals, and the tumor enriched or deplented IPA-truncated genes.
cancer	total_sample_pairs	total_gene	Tumor-enriched	Tumor-depleted	Fold	Total IPA-regulated genes
CESC	3	5610	1549	698	2.2192	2247
SARC	2	5412	1267	668	1.89671	1935
LUSC	49	5940	1166	270	4.31852	1436
PCPG	3	5292	1138	887	1.28298	2025
PAAD	4	5514	1027	522	1.96743	1549
BLCA	19	5761	1011	229	4.41485	1240
UCEC	23	5539	905	510	1.77451	1415
LUAD	57	5718	828	202	4.09901	1030
COAD	41	5444	820	279	2.93907	1099
KICH	23	5541	759	605	1.25455	1364
ESCA	8	6402	715	456	1.56798	1171
READ	9	5406	702	623	1.12681	1325
BRCA	112	5543	654	232	2.81897	886
CHOL	9	5274	650	726	0.895317	1376
HNSC	42	5614	620	203	3.05419	823
THYM	2	5332	578	434	1.3318	1012
STAD	27	6373	500	328	1.52439	828
KIRP	31	5424	493	540	0.912963	1033
PRAD	46	5474	419	183	2.28962	602
THCA	58	5391	394	721	0.546463	1115
KIRC	72	5444	350	756	0.462963	1106
LIHC	50	5176	328	197	1.66497	525

## Sheet: S2B
Table S2B. List of tumor enriched or depleted IPA genes in each cancer type. NA: not regulated.
gene_symbol	BLCA	BRCA	CESC	CHOL	COAD	ESCA	HNSC	KICH	KIRC	KIRP	LIHC	LUAD	LUSC	PAAD	PCPG	PRAD	READ	SARC	STAD	THCA	THYM	UCEC	# cancer types with tumor-enriched IPA	# cancer types with tumor-depleted IPA
RECK	enriched	enriched	enriched	enriched	enriched	enriched	enriched	enriched	enriched	enriched	enriched	enriched	enriched	enriched	NA	enriched	enriched	enriched	enriched	enriched	enriched	enriched	21	0
SLC6A16	enriched	enriched	enriched	enriched	enriched	enriched	NA	enriched	enriched	enriched	enriched	enriched	enriched	NA	enriched	enriched	enriched	enriched	enriched	enriched	enriched	enriched	20	0
NDE1	enriched	enriched	enriched	enriched	enriched	enriched	enriched	enriched	enriched	enriched	NA	enriched	enriched	enriched	depleted	enriched	enriched	enriched	enriched	enriched	enriched	enriched	20	1
CDC45	enriched	enriched	NA	enriched	enriched	enriched	enriched	enriched	enriched	enriched	enriched	enriched	enriched	NA	NA	enriched	enriched	enriched	enriched	enriched	enriched	enriched	19	0
FMO4	NA	enriched	enriched	enriched	enriched	enriched	NA	enriched	enriched	enriched	enriched	enriched	enriched	enriched	enriched	enriched	enriched	enriched	NA	enriched	enriched	enriched	19	0
SGO1	enriched	enriched	enriched	enriched	enriched	enriched	enriched	enriched	enriched	enriched	enriched	enriched	enriched	enriched	NA	NA	enriched	enriched	enriched	NA	enriched	enriched	19	0
ZNF540	enriched	enriched	enriched	enriched	enriched	enriched	enriched	enriched	enriched	enriched	enriched	enriched	enriched	NA	NA	enriched	enriched	enriched	enriched	NA	enriched	enriched	19	0
PHF19	enriched	enriched	enriched	enriched	enriched	enriched	enriched	NA	enriched	enriched	enriched	enriched	enriched	enriched	enriched	depleted	enriched	NA	enriched	enriched	enriched	enriched	19	1
CENPU	enriched	enriched	enriched	enriched	enriched	enriched	enriched	enriched	enriched	enriched	enriched	enriched	enriched	NA	NA	enriched	NA	enriched	enriched	enriched	NA	enriched	18	0
TNC	enriched	enriched	enriched	NA	enriched	enriched	enriched	enriched	enriched	NA	NA	enriched	enriched	enriched	enriched	enriched	enriched	enriched	enriched	enriched	enriched	NA	18	0
ZDHHC24	enriched	enriched	enriched	NA	enriched	enriched	enriched	enriched	enriched	enriched	NA	enriched	enriched	depleted	enriched	enriched	enriched	enriched	enriched	enriched	NA	enriched	18	1
FAM198A	enriched	enriched	enriched	enriched	enriched	enriched	enriched	enriched	enriched	enriched	enriched	enriched	enriched	NA	depleted	enriched	enriched	depleted	NA	enriched	enriched	enriched	18	2
MAP7D3	enriched	enriched	enriched	enriched	enriched	enriched	enriched	enriched	depleted	NA	NA	enriched	enriched	enriched	depleted	enriched	enriched	enriched	enriched	enriched	enriched	enriched	18	2
NEGR1	enriched	enriched	enriched	depleted	enriched	enriched	NA	enriched	enriched	enriched	enriched	enriched	enriched	depleted	depleted	enriched	enriched	enriched	enriched	enriched	enriched	enriched	18	3
BMP1	enriched	enriched	enriched	NA	enriched	enriched	enriched	enriched	enriched	NA	enriched	enriched	enriched	enriched	enriched	NA	enriched	enriched	enriched	NA	NA	enriched	17	0
CDCA3	enriched	enriched	enriched	NA	NA	enriched	enriched	enriched	enriched	enriched	enriched	enriched	enriched	enriched	NA	enriched	NA	enriched	enriched	NA	enriched	enriched	17	0
CEP68	enriched	enriched	enriched	enriched	enriched	NA	enriched	enriched	enriched	enriched	enriched	enriched	enriched	enriched	NA	NA	enriched	enriched	NA	enriched	NA	enriched	17	0
ERCC8	enriched	enriched	enriched	enriched	enriched	enriched	enriched	enriched	enriched	enriched	NA	enriched	enriched	enriched	NA	NA	NA	enriched	enriched	enriched	NA	enriched	17	0
GARNL3	enriched	enriched	NA	enriched	enriched	enriched	enriched	NA	enriched	enriched	NA	enriched	enriched	enriched	NA	NA	enriched	enriched	enriched	enriched	enriched	enriched	17	0
MYO19	enriched	enriched	enriched	enriched	enriched	enriched	NA	enriched	NA	enriched	enriched	enriched	enriched	NA	enriched	enriched	enriched	enriched	enriched	NA	NA	enriched	17	0
TMEM8B	NA	enriched	enriched	enriched	enriched	enriched	enriched	enriched	enriched	enriched	enriched	enriched	enriched	enriched	NA	NA	enriched	NA	enriched	enriched	NA	enriched	17	0
DLG2	enriched	enriched	enriched	enriched	enriched	enriched	enriched	enriched	enriched	enriched	enriched	NA	NA	NA	depleted	enriched	enriched	enriched	NA	enriched	enriched	enriched	17	1
H2AFV	enriched	enriched	enriched	enriched	enriched	NA	enriched	NA	enriched	enriched	enriched	enriched	enriched	enriched	depleted	NA	enriched	NA	enriched	enriched	enriched	enriched	17	1
RNASEH2B	enriched	enriched	enriched	depleted	NA	enriched	enriched	enriched	NA	enriched	enriched	enriched	enriched	NA	enriched	enriched	enriched	enriched	enriched	enriched	NA	enriched	17	1
EIF4E2	enriched	enriched	enriched	depleted	enriched	enriched	enriched	enriched	enriched	enriched	NA	enriched	enriched	enriched	depleted	NA	enriched	enriched	NA	enriched	enriched	enriched	17	2
JMJD6	enriched	enriched	enriched	depleted	enriched	enriched	enriched	enriched	enriched	enriched	NA	enriched	enriched	NA	depleted	enriched	enriched	NA	enriched	enriched	enriched	enriched	17	2
NME1-NME2	enriched	enriched	enriched	depleted	enriched	enriched	enriched	depleted	enriched	enriched	NA	enriched	enriched	NA	enriched	enriched	enriched	enriched	enriched	NA	enriched	enriched	17	2
AP1S2	enriched	enriched	enriched	enriched	enriched	enriched	NA	enriched	depleted	enriched	enriched	enriched	enriched	enriched	depleted	enriched	enriched	depleted	enriched	NA	enriched	enriched	17	3
CTNNA3	enriched	enriched	enriched	enriched	enriched	enriched	NA	enriched	NA	enriched	enriched	NA	NA	enriched	NA	enriched	enriched	enriched	NA	enriched	enriched	enriched	16	0
SP2	enriched	NA	enriched	NA	enriched	enriched	NA	NA	enriched	enriched	enriched	enriched	enriched	enriched	enriched	enriched	enriched	enriched	enriched	NA	NA	enriched	16	0
VRK3	enriched	NA	enriched	enriched	enriched	enriched	enriched	enriched	enriched	enriched	enriched	enriched	enriched	enriched	enriched	NA	enriched	enriched	NA	NA	NA	NA	16	0
DENND1A	enriched	enriched	enriched	enriched	enriched	enriched	enriched	depleted	enriched	enriched	NA	enriched	enriched	enriched	NA	NA	enriched	NA	NA	enriched	enriched	enriched	16	1
DSCR3	enriched	enriched	enriched	enriched	enriched	enriched	NA	NA	enriched	NA	enriched	enriched	enriched	enriched	NA	depleted	enriched	enriched	enriched	NA	enriched	enriched	16	1
FANCA	enriched	enriched	enriched	enriched	enriched	enriched	enriched	enriched	NA	enriched	enriched	enriched	enriched	enriched	NA	NA	NA	depleted	enriched	NA	enriched	enriched	16	1
LIMK2	enriched	enriched	enriched	NA	enriched	enriched	enriched	NA	enriched	enriched	NA	enriched	enriched	NA	depleted	enriched	enriched	enriched	enriched	NA	enriched	enriched	16	1
MPI	enriched	enriched	enriched	enriched	enriched	enriched	enriched	NA	enriched	enriched	NA	enriched	enriched	NA	NA	depleted	enriched	enriched	enriched	NA	enriched	enriched	16	1
PCGF5	enriched	enriched	enriched	enriched	NA	enriched	enriched	enriched	enriched	enriched	enriched	NA	enriched	depleted	NA	enriched	enriched	NA	enriched	enriched	NA	enriched	16	1
ZNF596	enriched	enriched	enriched	enriched	enriched	enriched	enriched	NA	NA	enriched	NA	enriched	enriched	enriched	depleted	enriched	enriched	enriched	enriched	enriched	NA	NA	16	1
DCP1B	enriched	enriched	enriched	NA	enriched	enriched	enriched	NA	NA	depleted	NA	enriched	enriched	enriched	depleted	enriched	enriched	enriched	enriched	enriched	enriched	enriched	16	2
GVQW3	enriched	enriched	enriched	enriched	NA	enriched	NA	enriched	NA	enriched	NA	enriched	enriched	enriched	depleted	enriched	enriched	depleted	enriched	enriched	enriched	enriched	16	2
STAT1	enriched	enriched	enriched	depleted	enriched	enriched	enriched	NA	enriched	enriched	NA	enriched	enriched	depleted	enriched	enriched	NA	enriched	enriched	enriched	NA	enriched	16	2
ZCWPW2	enriched	NA	enriched	enriched	enriched	enriched	enriched	enriched	enriched	enriched	NA	enriched	enriched	depleted	depleted	enriched	enriched	enriched	enriched	NA	NA	enriched	16	2
KCNMA1	enriched	enriched	enriched	NA	enriched	enriched	enriched	enriched	enriched	enriched	enriched	enriched	NA	depleted	depleted	NA	enriched	depleted	enriched	enriched	enriched	enriched	16	3
SHC3	enriched	enriched	enriched	NA	enriched	NA	enriched	enriched	enriched	enriched	depleted	enriched	enriched	enriched	depleted	enriched	enriched	depleted	enriched	NA	enriched	enriched	16	3
ABCA8	enriched	enriched	enriched	enriched	NA	enriched	enriched	enriched	NA	enriched	enriched	enriched	NA	enriched	enriched	NA	NA	enriched	enriched	NA	NA	enriched	15	0
BORCS8	enriched	enriched	enriched	enriched	enriched	NA	NA	enriched	NA	NA	enriched	enriched	enriched	enriched	enriched	NA	NA	enriched	enriched	NA	enriched	enriched	15	0
C11orf49	enriched	enriched	NA	enriched	enriched	NA	enriched	NA	enriched	enriched	enriched	enriched	NA	enriched	enriched	NA	enriched	enriched	NA	enriched	NA	enriched	15	0
CDADC1	enriched	enriched	NA	enriched	enriched	enriched	enriched	enriched	NA	enriched	enriched	enriched	enriched	enriched	enriched	NA	NA	enriched	NA	NA	NA	enriched	15	0
CRYZL1	enriched	NA	enriched	enriched	enriched	NA	enriched	enriched	enriched	enriched	NA	enriched	enriched	enriched	NA	NA	enriched	enriched	enriched	NA	NA	enriched	15	0
DNAJB4	enriched	enriched	enriched	NA	enriched	NA	enriched	enriched	NA	NA	NA	enriched	enriched	enriched	enriched	enriched	enriched	enriched	enriched	NA	NA	enriched	15	0
FBLN1	enriched	enriched	enriched	enriched	NA	NA	enriched	enriched	enriched	enriched	enriched	NA	enriched	enriched	NA	NA	NA	enriched	NA	enriched	enriched	enriched	15	0
ICE2	enriched	enriched	enriched	enriched	enriched	enriched	enriched	enriched	NA	NA	NA	enriched	enriched	enriched	NA	NA	enriched	enriched	enriched	NA	NA	enriched	15	0
NXPE3	enriched	enriched	NA	enriched	enriched	enriched	enriched	enriched	NA	NA	NA	enriched	enriched	enriched	enriched	NA	enriched	enriched	enriched	NA	NA	enriched	15	0
PLA2G4C	enriched	enriched	enriched	enriched	enriched	NA	enriched	enriched	NA	enriched	enriched	enriched	enriched	NA	enriched	enriched	enriched	NA	NA	NA	NA	enriched	15	0
PPARA	enriched	enriched	NA	enriched	enriched	enriched	enriched	NA	enriched	enriched	enriched	NA	NA	NA	NA	NA	enriched	enriched	enriched	enriched	enriched	enriched	15	0
RAPGEF3	enriched	enriched	enriched	enriched	enriched	NA	NA	enriched	enriched	enriched	enriched	enriched	enriched	enriched	enriched	enriched	NA	NA	NA	NA	NA	enriched	15	0
WDR53	enriched	enriched	NA	enriched	enriched	enriched	enriched	enriched	NA	enriched	NA	enriched	enriched	enriched	NA	NA	enriched	NA	enriched	enriched	NA	enriched	15	0
CDH23	enriched	enriched	enriched	enriched	enriched	NA	enriched	NA	depleted	NA	enriched	NA	enriched	enriched	NA	enriched	enriched	enriched	enriched	enriched	enriched	NA	15	1
CEP72	enriched	enriched	NA	NA	enriched	enriched	enriched	depleted	NA	NA	enriched	enriched	enriched	enriched	NA	NA	enriched	enriched	enriched	enriched	enriched	enriched	15	1
DBF4B	NA	enriched	enriched	depleted	enriched	enriched	enriched	enriched	enriched	enriched	NA	enriched	enriched	NA	NA	NA	enriched	enriched	enriched	NA	enriched	enriched	15	1
FAM104B	enriched	enriched	enriched	NA	enriched	enriched	enriched	enriched	enriched	enriched	enriched	enriched	enriched	NA	depleted	NA	NA	enriched	NA	enriched	NA	enriched	15	1
FLT1	NA	enriched	enriched	enriched	NA	enriched	NA	enriched	enriched	enriched	NA	enriched	enriched	enriched	enriched	NA	enriched	enriched	NA	depleted	enriched	enriched	15	1
KLHL7	enriched	enriched	enriched	NA	enriched	enriched	enriched	depleted	enriched	enriched	NA	enriched	enriched	enriched	NA	NA	enriched	enriched	enriched	NA	NA	enriched	15	1
TMEM110-MUSTN1	enriched	enriched	enriched	NA	enriched	enriched	NA	enriched	NA	NA	NA	enriched	enriched	enriched	depleted	NA	enriched	enriched	enriched	enriched	enriched	enriched	15	1
UCHL5	enriched	enriched	enriched	enriched	enriched	enriched	enriched	NA	NA	enriched	enriched	enriched	enriched	enriched	depleted	NA	NA	enriched	enriched	NA	NA	enriched	15	1
ZNF250	enriched	NA	enriched	NA	enriched	enriched	enriched	NA	NA	enriched	NA	enriched	enriched	enriched	depleted	enriched	enriched	enriched	enriched	enriched	NA	enriched	15	1
BUB1B-PAK6	enriched	enriched	NA	NA	NA	enriched	enriched	NA	enriched	enriched	enriched	enriched	enriched	depleted	enriched	enriched	enriched	depleted	enriched	NA	enriched	enriched	15	2
NFASC	enriched	enriched	enriched	enriched	enriched	NA	enriched	NA	enriched	enriched	enriched	enriched	enriched	enriched	depleted	NA	enriched	depleted	enriched	NA	NA	enriched	15	2
NFE2L3	enriched	enriched	enriched	enriched	enriched	enriched	NA	depleted	NA	NA	NA	enriched	enriched	enriched	NA	enriched	enriched	depleted	enriched	enriched	enriched	enriched	15	2
OAS1	NA	enriched	enriched	enriched	enriched	enriched	NA	enriched	depleted	enriched	NA	enriched	enriched	depleted	enriched	NA	enriched	enriched	enriched	enriched	NA	enriched	15	2
PPP3CB	enriched	enriched	enriched	enriched	enriched	NA	NA	enriched	depleted	depleted	enriched	enriched	enriched	enriched	enriched	enriched	enriched	NA	enriched	NA	NA	enriched	15	2
PSPC1	enriched	enriched	enriched	enriched	NA	enriched	enriched	NA	NA	NA	enriched	enriched	enriched	enriched	depleted	enriched	NA	depleted	enriched	enriched	enriched	enriched	15	2
ROR1	enriched	NA	enriched	enriched	enriched	NA	enriched	depleted	depleted	NA	NA	enriched	enriched	enriched	enriched	NA	enriched	enriched	enriched	enriched	enriched	enriched	15	2
HSPE1-MOB4	enriched	enriched	enriched	depleted	enriched	enriched	enriched	enriched	NA	enriched	NA	enriched	enriched	NA	depleted	enriched	enriched	depleted	enriched	NA	enriched	enriched	15	3
ABLIM2	enriched	enriched	enriched	NA	enriched	enriched	NA	enriched	NA	enriched	enriched	enriched	enriched	enriched	NA	NA	enriched	NA	NA	NA	enriched	enriched	14	0
AZI2	enriched	enriched	enriched	enriched	enriched	enriched	enriched	NA	NA	NA	enriched	enriched	enriched	NA	NA	NA	enriched	enriched	enriched	NA	NA	enriched	14	0
COA1	NA	enriched	enriched	enriched	enriched	enriched	NA	enriched	NA	NA	NA	enriched	enriched	NA	enriched	enriched	enriched	enriched	NA	enriched	NA	enriched	14	0
DONSON	enriched	enriched	NA	NA	enriched	enriched	enriched	NA	enriched	enriched	enriched	enriched	enriched	NA	NA	NA	enriched	enriched	enriched	NA	NA	enriched	14	0
FANCI	enriched	enriched	enriched	enriched	enriched	enriched	enriched	NA	NA	enriched	NA	enriched	enriched	enriched	NA	NA	NA	enriched	NA	NA	enriched	enriched	14	0
HPS1	enriched	NA	enriched	enriched	enriched	enriched	enriched	enriched	NA	NA	enriched	enriched	enriched	enriched	NA	NA	NA	enriched	enriched	NA	NA	enriched	14	0
IL4I1	enriched	enriched	enriched	enriched	enriched	enriched	enriched	NA	NA	NA	enriched	enriched	enriched	NA	NA	NA	NA	enriched	enriched	NA	enriched	enriched	14	0
JHY	enriched	enriched	enriched	NA	enriched	NA	enriched	enriched	NA	NA	NA	enriched	enriched	NA	NA	enriched	enriched	enriched	enriched	NA	enriched	enriched	14	0
NAAA	enriched	NA	enriched	NA	enriched	enriched	enriched	enriched	NA	NA	enriched	enriched	enriched	enriched	enriched	NA	NA	enriched	enriched	NA	enriched	NA	14	0
NASP	NA	enriched	enriched	enriched	enriched	NA	enriched	NA	enriched	enriched	enriched	enriched	enriched	enriched	enriched	NA	enriched	enriched	NA	NA	NA	NA	14	0
PLIN2	enriched	NA	NA	enriched	NA	enriched	enriched	NA	NA	NA	enriched	enriched	enriched	NA	enriched	enriched	enriched	enriched	enriched	NA	enriched	enriched	14	0
SDHAF4	enriched	enriched	enriched	enriched	enriched	enriched	enriched	NA	enriched	NA	NA	enriched	enriched	NA	NA	enriched	enriched	NA	enriched	NA	NA	enriched	14	0
TBC1D8B	enriched	NA	enriched	enriched	enriched	enriched	enriched	enriched	enriched	enriched	enriched	enriched	enriched	NA	enriched	NA	NA	NA	NA	NA	NA	enriched	14	0
TMEM232	enriched	NA	enriched	NA	NA	enriched	NA	enriched	NA	enriched	NA	enriched	enriched	enriched	enriched	enriched	enriched	enriched	enriched	NA	enriched	NA	14	0
ZFAND4	enriched	enriched	enriched	NA	enriched	enriched	enriched	NA	NA	enriched	NA	enriched	enriched	NA	NA	NA	NA	enriched	enriched	enriched	enriched	enriched	14	0
ABCF2	enriched	enriched	enriched	enriched	NA	enriched	enriched	enriched	depleted	NA	NA	enriched	enriched	NA	NA	enriched	NA	enriched	enriched	NA	enriched	enriched	14	1
DENND5B	enriched	NA	enriched	enriched	enriched	enriched	enriched	NA	NA	enriched	NA	NA	enriched	enriched	depleted	NA	enriched	enriched	NA	enriched	enriched	enriched	14	1
EFHC2	enriched	NA	enriched	NA	enriched	enriched	enriched	NA	enriched	enriched	NA	enriched	enriched	depleted	NA	enriched	enriched	NA	enriched	NA	enriched	enriched	14	1
FAM172A	enriched	enriched	NA	enriched	enriched	NA	enriched	enriched	NA	enriched	NA	enriched	enriched	NA	depleted	enriched	enriched	enriched	NA	NA	enriched	enriched	14	1
LAMP2	enriched	enriched	enriched	enriched	enriched	enriched	enriched	depleted	NA	enriched	NA	enriched	enriched	enriched	NA	NA	enriched	enriched	NA	NA	enriched	NA	14	1
NIPAL3	enriched	enriched	enriched	NA	enriched	enriched	NA	enriched	enriched	enriched	NA	enriched	enriched	NA	depleted	NA	enriched	enriched	NA	enriched	NA	enriched	14	1
PRKX	NA	enriched	enriched	depleted	enriched	NA	enriched	NA	enriched	enriched	NA	enriched	enriched	enriched	NA	enriched	enriched	enriched	enriched	NA	NA	enriched	14	1
RFC3	enriched	enriched	NA	NA	enriched	enriched	NA	NA	depleted	NA	NA	enriched	enriched	enriched	enriched	enriched	enriched	enriched	enriched	NA	enriched	enriched	14	1
XYLB	enriched	enriched	enriched	enriched	enriched	NA	enriched	enriched	NA	NA	NA	enriched	enriched	enriched	enriched	NA	enriched	enriched	NA	NA	depleted	enriched	14	1
GGPS1	enriched	NA	depleted	enriched	enriched	enriched	enriched	depleted	NA	NA	NA	NA	enriched	enriched	enriched	enriched	enriched	enriched	enriched	NA	enriched	enriched	14	2
ITGA1	NA	enriched	enriched	enriched	enriched	NA	depleted	enriched	depleted	enriched	enriched	enriched	enriched	enriched	NA	enriched	enriched	enriched	NA	NA	enriched	NA	14	2
OPHN1	enriched	enriched	enriched	depleted	enriched	NA	enriched	enriched	enriched	enriched	NA	enriched	enriched	NA	NA	NA	enriched	depleted	NA	enriched	enriched	enriched	14	2
PCBP2	NA	enriched	enriched	enriched	enriched	enriched	NA	enriched	NA	enriched	enriched	enriched	enriched	enriched	enriched	NA	enriched	depleted	NA	NA	depleted	enriched	14	2
RBCK1	enriched	enriched	enriched	depleted	enriched	enriched	enriched	NA	enriched	enriched	NA	enriched	enriched	NA	depleted	enriched	enriched	NA	enriched	NA	enriched	NA	14	2
RBPMS	NA	enriched	enriched	depleted	enriched	enriched	NA	NA	enriched	NA	enriched	enriched	enriched	enriched	depleted	NA	enriched	enriched	enriched	NA	enriched	enriched	14	2
SKIV2L2	enriched	enriched	NA	enriched	enriched	enriched	NA	enriched	depleted	enriched	NA	enriched	enriched	enriched	NA	depleted	enriched	enriched	enriched	NA	enriched	NA	14	2
SLC35A2	enriched	enriched	enriched	enriched	NA	enriched	NA	enriched	depleted	depleted	enriched	enriched	enriched	enriched	NA	enriched	NA	enriched	NA	NA	enriched	enriched	14	2
TRNT1	enriched	enriched	enriched	enriched	enriched	enriched	enriched	depleted	depleted	NA	enriched	enriched	enriched	enriched	NA	NA	NA	enriched	enriched	NA	NA	enriched	14	2
TSC1	enriched	enriched	enriched	enriched	NA	enriched	enriched	NA	depleted	enriched	enriched	enriched	enriched	enriched	depleted	NA	enriched	enriched	NA	NA	NA	enriched	14	2
ZNF862	enriched	enriched	enriched	enriched	enriched	enriched	enriched	NA	NA	enriched	NA	enriched	enriched	enriched	depleted	NA	NA	depleted	NA	enriched	enriched	enriched	14	2
WRB-SH3BGR	enriched	enriched	enriched	enriched	enriched	enriched	NA	depleted	enriched	enriched	NA	NA	NA	enriched	enriched	enriched	enriched	depleted	enriched	enriched	NA	depleted	14	3
NHLRC3	enriched	enriched	enriched	enriched	enriched	NA	depleted	enriched	depleted	depleted	enriched	enriched	enriched	enriched	depleted	enriched	enriched	enriched	NA	NA	NA	enriched	14	4
AMY2B	enriched	enriched	enriched	enriched	enriched	NA	enriched	NA	NA	NA	enriched	enriched	enriched	NA	enriched	enriched	NA	NA	enriched	NA	enriched	NA	13	0
ANKDD1A	enriched	enriched	enriched	NA	enriched	NA	enriched	NA	NA	enriched	NA	enriched	enriched	NA	enriched	NA	NA	enriched	NA	enriched	enriched	enriched	13	0
ANKRD29	enriched	enriched	enriched	enriched	enriched	NA	NA	NA	NA	NA	NA	enriched	enriched	enriched	enriched	enriched	enriched	enriched	NA	NA	NA	enriched	13	0
ANTXR1	NA	enriched	enriched	enriched	enriched	enriched	enriched	NA	NA	NA	NA	enriched	enriched	NA	enriched	NA	enriched	NA	enriched	enriched	NA	enriched	13	0
C16orf46	enriched	enriched	enriched	enriched	NA	enriched	enriched	NA	NA	NA	NA	enriched	enriched	enriched	NA	NA	enriched	enriched	enriched	NA	NA	enriched	13	0
CCDC88A	enriched	enriched	enriched	NA	enriched	NA	enriched	NA	NA	NA	enriched	enriched	enriched	enriched	enriched	NA	NA	enriched	enriched	NA	NA	enriched	13	0
COL14A1	enriched	NA	enriched	NA	enriched	enriched	enriched	enriched	NA	NA	enriched	enriched	enriched	NA	enriched	NA	NA	NA	enriched	NA	enriched	enriched	13	0
CPED1	enriched	NA	enriched	NA	enriched	NA	NA	NA	enriched	enriched	enriched	enriched	enriched	NA	NA	enriched	enriched	NA	enriched	NA	enriched	enriched	13	0
DISP1	enriched	enriched	enriched	NA	enriched	enriched	enriched	NA	NA	NA	NA	enriched	enriched	enriched	NA	enriched	enriched	NA	NA	NA	enriched	enriched	13	0
ERI2	NA	enriched	NA	enriched	enriched	enriched	enriched	enriched	enriched	enriched	enriched	NA	enriched	NA	enriched	NA	enriched	enriched	NA	NA	NA	NA	13	0
FAM228B	enriched	enriched	enriched	enriched	NA	enriched	NA	enriched	NA	NA	enriched	enriched	enriched	enriched	NA	enriched	NA	enriched	NA	NA	NA	enriched	13	0
GNAL	enriched	enriched	enriched	NA	enriched	enriched	enriched	NA	NA	NA	NA	enriched	enriched	enriched	enriched	enriched	NA	enriched	NA	NA	NA	enriched	13	0
GPR146	enriched	enriched	enriched	NA	enriched	NA	enriched	enriched	NA	NA	NA	enriched	enriched	NA	enriched	NA	enriched	NA	enriched	enriched	NA	enriched	13	0
IQCH	enriched	enriched	enriched	enriched	NA	NA	NA	enriched	NA	enriched	NA	enriched	enriched	enriched	NA	NA	enriched	enriched	NA	enriched	NA	enriched	13	0
PCDH11X	enriched	enriched	enriched	NA	enriched	NA	NA	enriched	enriched	enriched	NA	enriched	NA	NA	NA	enriched	enriched	NA	NA	enriched	enriched	enriched	13	0
PCDH11Y	enriched	enriched	enriched	NA	enriched	enriched	NA	enriched	enriched	enriched	NA	NA	NA	enriched	NA	enriched	enriched	NA	enriched	enriched	NA	NA	13	0
PPP2R2B	enriched	enriched	enriched	NA	enriched	enriched	NA	enriched	enriched	enriched	NA	enriched	NA	enriched	NA	enriched	enriched	NA	NA	NA	NA	enriched	13	0
SHANK3	NA	enriched	enriched	enriched	enriched	NA	NA	enriched	NA	NA	enriched	enriched	enriched	enriched	enriched	enriched	NA	NA	enriched	NA	enriched	NA	13	0
TBC1D9B	enriched	enriched	enriched	enriched	enriched	NA	enriched	NA	NA	enriched	NA	enriched	enriched	NA	enriched	NA	enriched	NA	enriched	NA	NA	enriched	13	0
TRIOBP	enriched	enriched	NA	NA	NA	NA	enriched	enriched	NA	NA	enriched	enriched	enriched	enriched	enriched	NA	enriched	enriched	enriched	NA	NA	enriched	13	0
TUBGCP3	enriched	enriched	enriched	NA	NA	enriched	enriched	NA	NA	NA	NA	enriched	enriched	enriched	NA	NA	enriched	enriched	enriched	NA	enriched	enriched	13	0
ZNF519	enriched	enriched	enriched	NA	enriched	NA	enriched	enriched	NA	NA	NA	enriched	enriched	enriched	NA	enriched	enriched	enriched	NA	NA	NA	enriched	13	0
CCDC30	enriched	NA	NA	depleted	enriched	enriched	enriched	enriched	enriched	NA	NA	enriched	enriched	NA	NA	enriched	enriched	NA	enriched	enriched	NA	enriched	13	1
COQ4	enriched	enriched	enriched	enriched	enriched	enriched	enriched	depleted	NA	NA	enriched	enriched	enriched	enriched	enriched	NA	enriched	NA	NA	NA	NA	NA	13	1
ELF2	enriched	NA	enriched	enriched	enriched	NA	NA	enriched	NA	enriched	enriched	enriched	enriched	enriched	NA	NA	enriched	NA	NA	enriched	depleted	enriched	13	1
ENDOV	enriched	NA	enriched	enriched	enriched	enriched	enriched	NA	NA	NA	enriched	NA	enriched	depleted	NA	NA	enriched	enriched	enriched	NA	enriched	enriched	13	1
ERICH1	enriched	enriched	enriched	NA	enriched	enriched	enriched	NA	NA	NA	NA	enriched	enriched	enriched	depleted	enriched	NA	enriched	enriched	NA	enriched	NA	13	1
KIAA1841	enriched	enriched	enriched	enriched	NA	enriched	NA	enriched	NA	NA	enriched	NA	enriched	enriched	enriched	NA	enriched	enriched	NA	NA	depleted	enriched	13	1
LRRC28	enriched	enriched	enriched	NA	enriched	NA	enriched	NA	enriched	enriched	NA	enriched	enriched	NA	enriched	enriched	NA	enriched	NA	depleted	NA	enriched	13	1
MBP	enriched	enriched	enriched	enriched	enriched	enriched	enriched	NA	depleted	NA	NA	enriched	enriched	NA	enriched	enriched	enriched	NA	NA	NA	enriched	NA	13	1
METTL21A	enriched	NA	enriched	enriched	NA	enriched	NA	NA	enriched	NA	enriched	NA	enriched	depleted	enriched	enriched	NA	enriched	enriched	NA	enriched	enriched	13	1
PCNX2	enriched	enriched	enriched	depleted	enriched	NA	NA	NA	NA	NA	NA	enriched	enriched	enriched	enriched	NA	enriched	enriched	NA	enriched	enriched	enriched	13	1
RAB3C	enriched	enriched	enriched	enriched	enriched	enriched	enriched	NA	depleted	NA	NA	NA	enriched	enriched	NA	NA	enriched	enriched	NA	NA	enriched	enriched	13	1
SEMA3E	enriched	enriched	enriched	NA	enriched	NA	enriched	enriched	enriched	NA	NA	enriched	enriched	depleted	NA	NA	enriched	enriched	enriched	NA	enriched	NA	13	1
SNX24	enriched	enriched	enriched	NA	enriched	enriched	NA	enriched	enriched	enriched	NA	enriched	enriched	depleted	NA	NA	NA	enriched	NA	enriched	NA	enriched	13	1
TCAIM	enriched	enriched	enriched	enriched	NA	enriched	enriched	NA	depleted	NA	enriched	enriched	enriched	enriched	enriched	NA	NA	enriched	NA	NA	NA	enriched	13	1
ZNF184	enriched	enriched	NA	NA	NA	enriched	NA	depleted	enriched	NA	NA	enriched	enriched	enriched	NA	enriched	enriched	enriched	enriched	NA	enriched	enriched	13	1
ZNF718	enriched	enriched	enriched	enriched	NA	NA	NA	NA	NA	enriched	enriched	enriched	enriched	enriched	NA	NA	enriched	enriched	NA	depleted	enriched	enriched	13	1
ACOT8	enriched	enriched	NA	enriched	enriched	enriched	NA	enriched	depleted	NA	enriched	NA	enriched	NA	depleted	NA	enriched	enriched	enriched	NA	enriched	enriched	13	2
BBS9	enriched	enriched	depleted	depleted	NA	enriched	enriched	NA	NA	enriched	NA	enriched	enriched	enriched	NA	enriched	enriched	enriched	enriched	NA	NA	enriched	13	2
FAM20C	enriched	NA	enriched	enriched	enriched	enriched	enriched	NA	NA	NA	enriched	enriched	enriched	NA	NA	enriched	enriched	NA	enriched	depleted	depleted	enriched	13	2
FUBP1	enriched	enriched	enriched	NA	enriched	enriched	NA	depleted	NA	NA	NA	enriched	enriched	NA	enriched	enriched	enriched	enriched	enriched	NA	depleted	enriched	13	2
ITGBL1	NA	enriched	enriched	enriched	enriched	enriched	enriched	depleted	NA	NA	NA	enriched	enriched	enriched	depleted	enriched	enriched	NA	enriched	NA	NA	enriched	13	2
OGG1	enriched	enriched	enriched	NA	NA	enriched	enriched	NA	enriched	enriched	NA	enriched	enriched	depleted	depleted	NA	NA	NA	enriched	enriched	enriched	enriched	13	2
PCTP	enriched	enriched	enriched	depleted	NA	enriched	enriched	NA	enriched	NA	NA	NA	enriched	enriched	enriched	enriched	enriched	enriched	enriched	depleted	NA	NA	13	2
POLR3C	enriched	enriched	enriched	enriched	NA	enriched	enriched	enriched	NA	NA	NA	enriched	enriched	enriched	depleted	NA	NA	depleted	NA	enriched	enriched	enriched	13	2
SP110	enriched	enriched	enriched	enriched	NA	enriched	NA	enriched	NA	enriched	enriched	enriched	enriched	enriched	depleted	NA	NA	depleted	NA	enriched	NA	enriched	13	2
TOM1L1	enriched	enriched	enriched	enriched	NA	enriched	enriched	NA	NA	NA	NA	enriched	enriched	enriched	enriched	enriched	enriched	depleted	NA	NA	depleted	enriched	13	2
BNIP2	enriched	enriched	enriched	NA	enriched	enriched	NA	enriched	depleted	NA	enriched	enriched	enriched	enriched	depleted	enriched	enriched	depleted	NA	NA	NA	enriched	13	3
CNPY3-GNMT	NA	enriched	enriched	enriched	enriched	enriched	enriched	depleted	enriched	enriched	NA	NA	NA	depleted	enriched	depleted	enriched	enriched	enriched	NA	NA	enriched	13	3
EPB41L5	enriched	enriched	enriched	depleted	NA	enriched	NA	enriched	NA	NA	depleted	enriched	enriched	enriched	NA	enriched	enriched	depleted	enriched	NA	enriched	enriched	13	3
HACD1	enriched	enriched	enriched	NA	enriched	enriched	enriched	enriched	depleted	depleted	NA	enriched	enriched	NA	enriched	enriched	enriched	NA	NA	depleted	NA	enriched	13	3
MBD5	enriched	NA	enriched	depleted	enriched	enriched	enriched	NA	NA	NA	NA	enriched	enriched	enriched	depleted	enriched	enriched	enriched	enriched	enriched	depleted	NA	13	3
MRPL37	enriched	enriched	enriched	depleted	enriched	enriched	NA	enriched	enriched	enriched	NA	enriched	enriched	NA	depleted	NA	NA	depleted	enriched	enriched	NA	enriched	13	3
ADARB2	enriched	enriched	NA	NA	enriched	enriched	enriched	enriched	enriched	NA	NA	enriched	enriched	NA	enriched	NA	NA	NA	enriched	NA	NA	enriched	12	0
ANGPTL5	enriched	enriched	NA	NA	enriched	enriched	enriched	NA	NA	NA	NA	enriched	enriched	enriched	NA	NA	enriched	NA	enriched	enriched	enriched	NA	12	0
AUNIP	enriched	enriched	enriched	NA	enriched	enriched	enriched	NA	NA	NA	NA	enriched	enriched	enriched	NA	NA	enriched	NA	enriched	NA	NA	enriched	12	0
BCL2	enriched	enriched	enriched	enriched	enriched	NA	NA	NA	NA	NA	NA	enriched	enriched	enriched	NA	enriched	enriched	NA	enriched	NA	NA	enriched	12	0
CNGA1	enriched	NA	NA	enriched	enriched	enriched	NA	NA	NA	enriched	enriched	NA	enriched	enriched	enriched	enriched	NA	NA	NA	NA	enriched	enriched	12	0
ITFG1	enriched	enriched	enriched	NA	NA	enriched	NA	NA	NA	NA	enriched	enriched	enriched	enriched	enriched	enriched	NA	enriched	NA	NA	NA	enriched	12	0
MAMDC2	enriched	NA	NA	NA	enriched	NA	enriched	enriched	enriched	enriched	enriched	NA	NA	enriched	NA	enriched	enriched	NA	NA	enriched	enriched	NA	12	0
MARK1	NA	enriched	enriched	NA	NA	NA	enriched	enriched	NA	enriched	NA	enriched	enriched	NA	enriched	enriched	enriched	NA	enriched	NA	NA	enriched	12	0
MORN1	enriched	enriched	enriched	enriched	enriched	NA	NA	enriched	NA	NA	enriched	enriched	enriched	NA	NA	NA	enriched	enriched	NA	NA	NA	enriched	12	0
NR2C1	enriched	enriched	enriched	enriched	enriched	NA	NA	enriched	NA	NA	NA	enriched	enriched	enriched	NA	NA	enriched	NA	enriched	NA	NA	enriched	12	0
PARD3	enriched	enriched	enriched	NA	enriched	NA	enriched	NA	NA	NA	NA	enriched	enriched	NA	NA	enriched	enriched	enriched	NA	NA	enriched	enriched	12	0
PLCB1	enriched	NA	enriched	enriched	enriched	enriched	enriched	NA	NA	NA	NA	enriched	enriched	enriched	NA	NA	enriched	enriched	NA	NA	enriched	NA	12	0
PRSS23	NA	enriched	enriched	enriched	NA	enriched	enriched	enriched	NA	NA	NA	enriched	enriched	enriched	NA	NA	NA	NA	NA	enriched	enriched	enriched	12	0
RNASEH1	enriched	NA	enriched	enriched	NA	NA	NA	NA	NA	NA	NA	enriched	enriched	enriched	enriched	NA	enriched	enriched	enriched	NA	enriched	enriched	12	0
SLC38A10	NA	enriched	enriched	enriched	enriched	NA	NA	enriched	NA	enriched	enriched	enriched	enriched	NA	enriched	NA	enriched	NA	enriched	NA	NA	NA	12	0
SLC9A9	enriched	NA	enriched	enriched	enriched	NA	enriched	enriched	NA	NA	enriched	NA	enriched	enriched	NA	NA	enriched	NA	NA	NA	enriched	enriched	12	0
ZCCHC2	NA	enriched	enriched	enriched	enriched	enriched	NA	NA	NA	NA	NA	enriched	enriched	enriched	enriched	NA	enriched	enriched	NA	NA	NA	enriched	12	0
ZNF107	enriched	enriched	enriched	NA	enriched	NA	enriched	NA	NA	enriched	NA	enriched	enriched	NA	enriched	enriched	enriched	NA	NA	NA	NA	enriched	12	0
ZNF451	enriched	enriched	NA	enriched	NA	NA	enriched	NA	NA	NA	NA	enriched	enriched	NA	enriched	enriched	enriched	enriched	enriched	NA	NA	enriched	12	0
AKAP6	enriched	enriched	enriched	NA	enriched	NA	enriched	NA	NA	enriched	NA	enriched	enriched	NA	depleted	NA	enriched	NA	enriched	enriched	NA	enriched	12	1
ARL5A	enriched	enriched	enriched	enriched	enriched	NA	enriched	NA	NA	NA	NA	NA	enriched	enriched	depleted	enriched	enriched	NA	enriched	NA	NA	enriched	12	1
BTD	enriched	enriched	enriched	depleted	enriched	enriched	NA	enriched	enriched	enriched	NA	NA	enriched	NA	NA	NA	NA	NA	NA	enriched	enriched	enriched	12	1
CLSPN	NA	enriched	enriched	enriched	NA	enriched	enriched	NA	NA	enriched	NA	enriched	enriched	enriched	NA	NA	NA	depleted	enriched	enriched	NA	enriched	12	1
CROT	enriched	enriched	enriched	NA	NA	NA	enriched	enriched	NA	enriched	NA	enriched	enriched	NA	enriched	NA	NA	enriched	enriched	depleted	NA	enriched	12	1
DNAJC24	NA	NA	enriched	enriched	enriched	NA	enriched	NA	NA	NA	NA	NA	enriched	enriched	depleted	enriched	enriched	enriched	enriched	NA	enriched	enriched	12	1
ERCC4	enriched	enriched	NA	enriched	enriched	enriched	NA	enriched	NA	enriched	enriched	enriched	NA	NA	NA	NA	enriched	depleted	NA	enriched	NA	enriched	12	1
FAM124A	enriched	enriched	depleted	NA	enriched	NA	NA	enriched	NA	NA	NA	enriched	enriched	NA	enriched	enriched	NA	enriched	enriched	enriched	NA	enriched	12	1
FBXO3	enriched	NA	enriched	NA	enriched	enriched	enriched	NA	NA	enriched	NA	NA	enriched	enriched	depleted	NA	enriched	enriched	enriched	NA	enriched	NA	12	1
FMN2	enriched	enriched	enriched	NA	enriched	NA	enriched	NA	enriched	NA	NA	enriched	enriched	enriched	depleted	NA	NA	enriched	NA	enriched	enriched	NA	12	1
GRHPR	enriched	NA	NA	enriched	enriched	NA	NA	enriched	enriched	NA	enriched	enriched	NA	NA	enriched	NA	enriched	enriched	NA	enriched	depleted	enriched	12	1
MROH8	NA	enriched	NA	enriched	NA	enriched	enriched	enriched	enriched	NA	enriched	NA	enriched	enriched	depleted	enriched	NA	enriched	enriched	NA	NA	NA	12	1
N4BP2L1	enriched	enriched	NA	NA	enriched	enriched	enriched	NA	depleted	NA	enriched	enriched	enriched	enriched	NA	enriched	NA	NA	enriched	NA	NA	enriched	12	1
NPHP1	enriched	enriched	enriched	NA	enriched	enriched	enriched	enriched	NA	NA	NA	enriched	enriched	NA	depleted	enriched	NA	NA	enriched	NA	NA	enriched	12	1
PATJ	enriched	NA	enriched	enriched	NA	enriched	enriched	NA	NA	enriched	NA	enriched	enriched	enriched	enriched	NA	enriched	NA	enriched	NA	depleted	NA	12	1
PIBF1	enriched	NA	enriched	NA	enriched	NA	enriched	NA	NA	NA	NA	enriched	enriched	NA	depleted	NA	enriched	enriched	enriched	enriched	enriched	enriched	12	1
PREP	enriched	enriched	enriched	NA	enriched	enriched	NA	depleted	enriched	enriched	NA	enriched	enriched	NA	NA	NA	enriched	enriched	enriched	NA	NA	NA	12	1
RABGEF1	enriched	enriched	enriched	enriched	enriched	NA	enriched	depleted	NA	NA	enriched	enriched	enriched	NA	enriched	NA	enriched	NA	NA	NA	NA	enriched	12	1
RPP30	enriched	NA	NA	enriched	enriched	enriched	NA	enriched	enriched	enriched	NA	NA	NA	enriched	depleted	enriched	NA	enriched	NA	enriched	NA	enriched	12	1
ZC3HAV1	NA	enriched	enriched	enriched	enriched	enriched	NA	NA	NA	NA	NA	enriched	NA	NA	depleted	enriched	enriched	enriched	enriched	enriched	NA	enriched	12	1
ZFP2	enriched	NA	enriched	NA	enriched	enriched	enriched	enriched	NA	enriched	NA	NA	enriched	NA	depleted	NA	enriched	NA	enriched	enriched	NA	enriched	12	1
ZNF577	enriched	NA	NA	NA	NA	enriched	enriched	NA	enriched	enriched	NA	enriched	enriched	enriched	depleted	enriched	enriched	enriched	NA	enriched	NA	NA	12	1
CBWD1	enriched	enriched	enriched	depleted	enriched	enriched	enriched	NA	NA	NA	depleted	enriched	enriched	enriched	NA	NA	NA	enriched	enriched	NA	NA	enriched	12	2
CLIP4	enriched	enriched	enriched	NA	NA	enriched	NA	enriched	enriched	enriched	NA	enriched	enriched	depleted	depleted	enriched	NA	NA	NA	NA	enriched	enriched	12	2
CNIH4	enriched	enriched	enriched	depleted	enriched	enriched	enriched	NA	NA	NA	NA	enriched	enriched	enriched	depleted	NA	NA	enriched	enriched	NA	NA	enriched	12	2
EIF4A2	NA	NA	enriched	enriched	enriched	NA	NA	NA	enriched	NA	enriched	enriched	enriched	NA	depleted	enriched	enriched	enriched	enriched	depleted	NA	enriched	12	2
ELP6	enriched	enriched	enriched	NA	enriched	enriched	enriched	depleted	NA	NA	NA	NA	enriched	depleted	NA	enriched	enriched	NA	enriched	enriched	NA	enriched	12	2
HNRNPDL	enriched	NA	enriched	enriched	NA	NA	enriched	enriched	enriched	enriched	NA	enriched	enriched	NA	depleted	enriched	NA	enriched	NA	NA	depleted	enriched	12	2
KCNC4	enriched	enriched	enriched	NA	enriched	NA	enriched	NA	NA	enriched	NA	enriched	enriched	depleted	depleted	enriched	enriched	NA	NA	NA	enriched	enriched	12	2
LDB3	enriched	NA	depleted	NA	enriched	enriched	NA	enriched	NA	NA	NA	enriched	enriched	depleted	enriched	NA	enriched	enriched	enriched	enriched	enriched	NA	12	2
NDST1	enriched	enriched	enriched	depleted	enriched	NA	NA	NA	NA	enriched	NA	enriched	enriched	enriched	enriched	NA	enriched	depleted	NA	NA	enriched	enriched	12	2
PCM1	enriched	enriched	enriched	depleted	enriched	enriched	enriched	NA	NA	NA	NA	enriched	enriched	enriched	depleted	NA	enriched	NA	enriched	NA	NA	enriched	12	2
PRKCE	enriched	NA	enriched	NA	enriched	enriched	enriched	depleted	NA	NA	NA	enriched	enriched	depleted	enriched	NA	enriched	enriched	NA	NA	enriched	enriched	12	2
2022-09-08	enriched	enriched	enriched	enriched	NA	NA	enriched	depleted	NA	NA	NA	enriched	enriched	enriched	depleted	enriched	NA	enriched	NA	NA	enriched	enriched	12	2
SMAD6	enriched	enriched	enriched	enriched	NA	NA	NA	enriched	NA	enriched	enriched	enriched	enriched	depleted	NA	enriched	NA	NA	enriched	depleted	NA	enriched	12	2
SNX1	enriched	enriched	enriched	NA	NA	enriched	NA	NA	NA	NA	NA	enriched	enriched	enriched	depleted	NA	enriched	depleted	enriched	enriched	enriched	enriched	12	2
SPATA6	enriched	NA	enriched	depleted	enriched	NA	enriched	enriched	NA	NA	NA	enriched	enriched	NA	enriched	enriched	enriched	depleted	enriched	NA	NA	enriched	12	2
SYNJ2	enriched	enriched	enriched	enriched	enriched	enriched	enriched	NA	NA	enriched	enriched	NA	enriched	NA	depleted	NA	NA	depleted	NA	enriched	NA	enriched	12	2
BICD1	NA	enriched	enriched	depleted	enriched	enriched	enriched	NA	NA	NA	depleted	enriched	enriched	enriched	depleted	NA	enriched	NA	enriched	NA	enriched	enriched	12	3
DCUN1D5	NA	enriched	enriched	enriched	NA	NA	enriched	NA	depleted	NA	enriched	enriched	enriched	enriched	depleted	enriched	enriched	depleted	NA	enriched	NA	enriched	12	3
DTNA	enriched	NA	enriched	depleted	enriched	enriched	depleted	NA	NA	depleted	NA	NA	enriched	NA	enriched	enriched	enriched	enriched	enriched	NA	enriched	enriched	12	3
EXD3	enriched	NA	NA	NA	enriched	enriched	NA	enriched	NA	NA	enriched	enriched	enriched	enriched	depleted	NA	enriched	enriched	enriched	depleted	depleted	enriched	12	3
RILPL1	enriched	NA	enriched	enriched	enriched	NA	enriched	depleted	depleted	NA	enriched	enriched	enriched	enriched	depleted	NA	enriched	enriched	NA	depleted	depleted	enriched	12	5
ADK	enriched	enriched	NA	enriched	enriched	NA	NA	NA	NA	enriched	enriched	NA	enriched	NA	enriched	NA	enriched	enriched	enriched	NA	NA	NA	11	0
ANKRD10	enriched	NA	enriched	NA	enriched	NA	enriched	enriched	NA	NA	NA	enriched	enriched	enriched	NA	enriched	enriched	enriched	NA	NA	NA	NA	11	0
ATAD5	enriched	enriched	enriched	NA	enriched	NA	enriched	NA	enriched	NA	NA	NA	enriched	enriched	enriched	NA	NA	enriched	enriched	NA	NA	NA	11	0
BOD1L1	NA	enriched	enriched	NA	enriched	NA	enriched	enriched	NA	enriched	NA	NA	enriched	enriched	enriched	NA	NA	NA	NA	enriched	NA	enriched	11	0
CEP120	enriched	enriched	enriched	enriched	NA	enriched	NA	enriched	NA	enriched	NA	enriched	enriched	NA	NA	enriched	NA	NA	NA	NA	NA	enriched	11	0
CFLAR	NA	enriched	enriched	NA	enriched	enriched	NA	NA	NA	enriched	NA	enriched	enriched	enriched	NA	NA	NA	NA	enriched	NA	enriched	enriched	11	0
CHD9	enriched	NA	enriched	NA	enriched	enriched	NA	NA	NA	NA	NA	NA	enriched	enriched	enriched	NA	enriched	NA	enriched	enriched	NA	enriched	11	0
DCBLD1	NA	NA	NA	enriched	enriched	enriched	enriched	NA	enriched	NA	NA	NA	NA	enriched	enriched	NA	enriched	NA	enriched	enriched	NA	enriched	11	0
EFCAB11	enriched	enriched	enriched	NA	enriched	NA	enriched	enriched	NA	NA	NA	NA	enriched	NA	enriched	NA	NA	enriched	NA	NA	enriched	enriched	11	0
FLCN	enriched	enriched	enriched	NA	enriched	NA	enriched	NA	NA	NA	NA	enriched	enriched	enriched	NA	NA	enriched	NA	enriched	NA	NA	enriched	11	0
GLIPR1L2	enriched	enriched	enriched	NA	NA	NA	NA	enriched	NA	enriched	NA	enriched	enriched	NA	enriched	enriched	enriched	NA	NA	NA	NA	enriched	11	0
HGF	enriched	enriched	enriched	NA	NA	NA	NA	enriched	enriched	enriched	enriched	enriched	enriched	NA	enriched	NA	NA	NA	NA	NA	NA	enriched	11	0
ITGB3BP	enriched	enriched	enriched	NA	NA	NA	enriched	enriched	NA	NA	NA	enriched	enriched	enriched	NA	NA	enriched	NA	enriched	NA	NA	enriched	11	0
MROH1	enriched	enriched	enriched	NA	enriched	enriched	enriched	NA	NA	NA	NA	enriched	enriched	enriched	NA	NA	enriched	NA	NA	NA	enriched	NA	11	0
OXR1	enriched	NA	enriched	NA	NA	NA	enriched	NA	NA	enriched	NA	enriched	enriched	enriched	enriched	NA	NA	enriched	enriched	NA	NA	enriched	11	0
PCMTD1	NA	NA	NA	enriched	enriched	enriched	enriched	enriched	enriched	enriched	NA	NA	enriched	NA	enriched	NA	NA	enriched	NA	enriched	NA	NA	11	0
PLD1	NA	enriched	enriched	enriched	enriched	NA	NA	NA	NA	NA	enriched	enriched	enriched	enriched	NA	NA	enriched	NA	enriched	NA	NA	enriched	11	0
RBFOX1	enriched	NA	enriched	NA	NA	NA	NA	enriched	enriched	enriched	NA	NA	NA	NA	NA	enriched	enriched	enriched	enriched	NA	enriched	enriched	11	0
RECQL	enriched	NA	enriched	enriched	enriched	NA	enriched	enriched	enriched	enriched	NA	enriched	enriched	NA	NA	NA	enriched	NA	NA	NA	NA	NA	11	0
TSGA10	enriched	enriched	NA	enriched	NA	NA	enriched	enriched	NA	NA	NA	enriched	enriched	NA	enriched	NA	enriched	enriched	NA	NA	enriched	NA	11	0
WDR27	enriched	enriched	enriched	NA	NA	NA	enriched	NA	NA	enriched	NA	NA	enriched	NA	enriched	enriched	NA	enriched	enriched	NA	NA	enriched	11	0
AK9	enriched	enriched	enriched	NA	enriched	enriched	enriched	enriched	NA	NA	NA	enriched	enriched	enriched	NA	depleted	NA	enriched	NA	NA	NA	NA	11	1
ATP11B	enriched	enriched	enriched	enriched	NA	NA	enriched	NA	NA	NA	NA	enriched	enriched	depleted	NA	enriched	NA	enriched	enriched	NA	NA	enriched	11	1
ATP2A2	enriched	enriched	enriched	NA	NA	NA	NA	NA	NA	enriched	NA	enriched	enriched	NA	NA	enriched	depleted	enriched	enriched	NA	enriched	enriched	11	1
B4GALNT3	enriched	NA	enriched	NA	enriched	enriched	NA	enriched	enriched	enriched	NA	NA	enriched	enriched	enriched	NA	enriched	NA	NA	depleted	NA	NA	11	1
C14orf37	NA	NA	enriched	NA	enriched	NA	NA	enriched	enriched	enriched	NA	NA	NA	enriched	NA	enriched	NA	enriched	enriched	enriched	depleted	enriched	11	1
C16orf52	enriched	enriched	enriched	NA	NA	NA	NA	enriched	NA	enriched	NA	enriched	enriched	enriched	NA	enriched	depleted	NA	NA	enriched	NA	enriched	11	1
DEPTOR	enriched	enriched	enriched	enriched	enriched	NA	enriched	NA	NA	NA	NA	NA	enriched	NA	depleted	NA	NA	enriched	enriched	enriched	NA	enriched	11	1
FAM208B	NA	enriched	enriched	enriched	enriched	NA	enriched	enriched	NA	NA	enriched	NA	NA	enriched	enriched	NA	enriched	enriched	NA	depleted	NA	NA	11	1
GTDC1	NA	enriched	enriched	NA	enriched	enriched	NA	depleted	NA	NA	NA	enriched	enriched	enriched	NA	enriched	enriched	enriched	NA	NA	enriched	NA	11	1
HNMT	enriched	NA	NA	enriched	enriched	enriched	NA	enriched	NA	enriched	NA	NA	enriched	NA	depleted	NA	enriched	NA	enriched	enriched	NA	enriched	11	1
KRTCAP3	enriched	enriched	enriched	enriched	NA	enriched	NA	enriched	NA	NA	NA	enriched	enriched	enriched	NA	NA	depleted	NA	NA	enriched	NA	enriched	11	1
LEPR	enriched	enriched	enriched	enriched	NA	enriched	enriched	enriched	NA	NA	NA	enriched	enriched	NA	depleted	NA	NA	enriched	NA	NA	enriched	NA	11	1
LYST	enriched	enriched	enriched	NA	enriched	enriched	NA	NA	NA	NA	NA	enriched	enriched	enriched	depleted	NA	enriched	enriched	NA	NA	NA	enriched	11	1
NFATC1	NA	enriched	enriched	NA	enriched	enriched	NA	NA	enriched	enriched	NA	enriched	NA	NA	depleted	NA	enriched	NA	enriched	enriched	NA	enriched	11	1
PIP5K1B	enriched	enriched	enriched	depleted	NA	NA	NA	NA	enriched	enriched	NA	enriched	enriched	NA	enriched	enriched	NA	enriched	NA	NA	enriched	NA	11	1
PSIP1	enriched	enriched	enriched	NA	NA	enriched	enriched	NA	depleted	NA	NA	enriched	enriched	NA	enriched	NA	NA	enriched	enriched	NA	NA	enriched	11	1
RFT1	enriched	enriched	enriched	NA	enriched	enriched	NA	NA	NA	NA	NA	enriched	enriched	depleted	NA	NA	enriched	enriched	enriched	NA	NA	enriched	11	1
RPL36A-HNRNPH2	enriched	NA	NA	enriched	enriched	NA	NA	enriched	enriched	enriched	NA	enriched	enriched	NA	depleted	enriched	enriched	NA	NA	enriched	NA	NA	11	1
RSPH3	NA	enriched	enriched	depleted	enriched	NA	NA	enriched	NA	enriched	NA	enriched	enriched	enriched	NA	enriched	NA	enriched	NA	NA	NA	enriched	11	1
SCFD1	enriched	enriched	enriched	enriched	enriched	NA	enriched	NA	NA	enriched	NA	enriched	enriched	NA	depleted	NA	enriched	enriched	NA	NA	NA	NA	11	1
SMARCC2	enriched	NA	enriched	NA	enriched	NA	enriched	NA	NA	NA	enriched	NA	enriched	NA	enriched	enriched	enriched	enriched	enriched	depleted	NA	NA	11	1
ST7L	enriched	enriched	NA	NA	enriched	enriched	NA	enriched	NA	NA	NA	enriched	NA	enriched	NA	enriched	enriched	depleted	NA	NA	enriched	enriched	11	1
WASHC4	enriched	enriched	enriched	enriched	enriched	NA	enriched	NA	NA	NA	NA	NA	enriched	NA	enriched	NA	enriched	enriched	NA	NA	depleted	enriched	11	1
WDR78	enriched	NA	enriched	NA	enriched	enriched	NA	enriched	NA	NA	NA	enriched	enriched	enriched	enriched	NA	enriched	NA	NA	depleted	NA	enriched	11	1
ZMYM5	NA	NA	enriched	enriched	enriched	enriched	NA	enriched	NA	enriched	NA	NA	enriched	NA	enriched	enriched	enriched	depleted	NA	NA	NA	enriched	11	1
ZNF320	NA	NA	enriched	enriched	NA	enriched	enriched	enriched	NA	enriched	NA	NA	enriched	NA	depleted	NA	NA	enriched	NA	enriched	enriched	enriched	11	1
ZNF843	enriched	enriched	enriched	NA	NA	enriched	NA	enriched	NA	NA	NA	NA	enriched	NA	NA	enriched	enriched	depleted	NA	enriched	enriched	enriched	11	1
ASAH1	enriched	enriched	NA	enriched	enriched	NA	NA	enriched	NA	enriched	enriched	NA	enriched	NA	depleted	NA	NA	NA	depleted	enriched	enriched	enriched	11	2
CAPS2	enriched	NA	depleted	enriched	NA	enriched	enriched	depleted	enriched	NA	enriched	enriched	enriched	NA	enriched	NA	NA	enriched	NA	enriched	NA	NA	11	2
CDON	enriched	enriched	enriched	NA	enriched	NA	enriched	depleted	depleted	NA	NA	enriched	enriched	enriched	enriched	NA	enriched	NA	NA	NA	NA	enriched	11	2
CHID1	enriched	enriched	NA	NA	enriched	enriched	enriched	NA	depleted	depleted	NA	enriched	enriched	enriched	enriched	NA	enriched	NA	NA	NA	NA	enriched	11	2
CLHC1	enriched	NA	NA	depleted	NA	NA	enriched	enriched	enriched	enriched	NA	NA	enriched	enriched	depleted	NA	enriched	enriched	enriched	NA	NA	enriched	11	2
GPSM2	enriched	enriched	enriched	enriched	NA	enriched	NA	enriched	NA	enriched	NA	enriched	enriched	enriched	depleted	depleted	NA	NA	NA	NA	enriched	NA	11	2
KCNIP3	enriched	enriched	NA	enriched	enriched	NA	NA	NA	depleted	depleted	NA	enriched	enriched	enriched	NA	enriched	enriched	NA	NA	enriched	NA	enriched	11	2
LARP6	enriched	NA	enriched	depleted	enriched	NA	enriched	NA	NA	NA	NA	enriched	enriched	NA	enriched	enriched	enriched	depleted	enriched	NA	NA	enriched	11	2
LRRC61	enriched	NA	enriched	NA	enriched	NA	NA	NA	depleted	NA	NA	enriched	enriched	depleted	enriched	enriched	enriched	NA	enriched	NA	enriched	enriched	11	2
MAPKAP1	enriched	enriched	enriched	depleted	enriched	enriched	enriched	NA	NA	NA	depleted	enriched	enriched	NA	enriched	NA	enriched	NA	NA	NA	NA	enriched	11	2
MRPS6	enriched	NA	enriched	NA	NA	NA	enriched	enriched	depleted	NA	NA	enriched	enriched	enriched	enriched	NA	enriched	enriched	enriched	depleted	NA	NA	11	2
NEDD8-MDP1	enriched	NA	enriched	enriched	enriched	NA	enriched	NA	depleted	NA	enriched	enriched	enriched	NA	depleted	NA	enriched	enriched	NA	NA	NA	enriched	11	2
PAK3	enriched	enriched	enriched	depleted	enriched	NA	enriched	NA	NA	enriched	enriched	NA	NA	depleted	NA	NA	enriched	enriched	enriched	NA	enriched	NA	11	2
PJVK	enriched	enriched	enriched	depleted	enriched	NA	enriched	enriched	enriched	NA	NA	NA	NA	NA	depleted	enriched	enriched	NA	NA	NA	enriched	enriched	11	2
RNLS	enriched	enriched	enriched	depleted	NA	NA	NA	NA	NA	NA	NA	enriched	enriched	enriched	depleted	enriched	enriched	enriched	NA	NA	enriched	enriched	11	2
2022-09-06	NA	enriched	NA	depleted	enriched	enriched	NA	enriched	enriched	NA	enriched	NA	NA	NA	depleted	enriched	enriched	enriched	enriched	NA	enriched	NA	11	2
SLC35E4	NA	NA	enriched	NA	enriched	NA	NA	enriched	enriched	NA	enriched	enriched	enriched	enriched	depleted	NA	enriched	NA	enriched	enriched	depleted	NA	11	2
SLC44A1	enriched	enriched	NA	enriched	NA	enriched	enriched	depleted	depleted	NA	NA	enriched	enriched	NA	enriched	NA	NA	enriched	enriched	NA	enriched	NA	11	2
DEF8	NA	enriched	enriched	depleted	enriched	enriched	enriched	NA	enriched	enriched	NA	enriched	enriched	enriched	depleted	depleted	NA	NA	NA	NA	NA	enriched	11	3
IFT43	enriched	enriched	enriched	depleted	NA	enriched	NA	enriched	NA	NA	NA	enriched	enriched	NA	depleted	enriched	NA	depleted	NA	enriched	enriched	enriched	11	3
ITSN1	NA	NA	enriched	depleted	enriched	enriched	enriched	NA	enriched	enriched	NA	enriched	enriched	NA	depleted	NA	enriched	NA	enriched	enriched	depleted	NA	11	3
KNDC1	NA	NA	enriched	depleted	enriched	enriched	enriched	depleted	NA	NA	NA	enriched	enriched	enriched	NA	enriched	enriched	enriched	NA	depleted	NA	enriched	11	3
PHTF1	enriched	NA	NA	enriched	enriched	enriched	enriched	depleted	enriched	enriched	NA	enriched	enriched	NA	NA	depleted	NA	enriched	enriched	NA	depleted	NA	11	3
PRDM11	NA	enriched	enriched	NA	enriched	enriched	NA	NA	enriched	NA	NA	enriched	enriched	enriched	depleted	depleted	enriched	depleted	enriched	enriched	NA	NA	11	3
RECQL5	enriched	enriched	NA	NA	enriched	depleted	enriched	enriched	depleted	NA	NA	enriched	enriched	depleted	enriched	NA	enriched	enriched	NA	NA	enriched	NA	11	3
SAV1	NA	enriched	enriched	NA	enriched	enriched	enriched	NA	depleted	NA	enriched	NA	NA	enriched	depleted	NA	enriched	enriched	enriched	depleted	NA	enriched	11	3
TRIM4	enriched	NA	NA	enriched	enriched	enriched	enriched	enriched	enriched	NA	NA	NA	enriched	depleted	NA	NA	enriched	NA	enriched	depleted	depleted	enriched	11	3
CFDP1	enriched	enriched	enriched	enriched	enriched	NA	NA	depleted	depleted	depleted	NA	enriched	enriched	enriched	NA	enriched	enriched	enriched	NA	depleted	NA	NA	11	4
GGCX	enriched	enriched	enriched	depleted	NA	enriched	enriched	enriched	NA	NA	enriched	enriched	enriched	depleted	depleted	NA	depleted	NA	NA	enriched	NA	enriched	11	4
PLA2R1	NA	enriched	enriched	depleted	enriched	enriched	enriched	enriched	NA	NA	NA	enriched	enriched	depleted	enriched	NA	depleted	enriched	NA	NA	depleted	enriched	11	4
ZNF518A	NA	depleted	depleted	enriched	enriched	NA	enriched	depleted	enriched	enriched	enriched	NA	NA	enriched	enriched	NA	enriched	enriched	NA	depleted	enriched	depleted	11	5
DHX30	enriched	enriched	enriched	depleted	enriched	enriched	NA	NA	depleted	depleted	NA	enriched	enriched	enriched	depleted	NA	NA	depleted	enriched	depleted	enriched	enriched	11	6
MVP	enriched	NA	enriched	depleted	enriched	depleted	depleted	NA	depleted	depleted	NA	enriched	enriched	depleted	enriched	enriched	enriched	enriched	NA	depleted	enriched	enriched	11	7
ANGPTL1	enriched	NA	NA	enriched	NA	NA	NA	enriched	enriched	NA	enriched	NA	NA	enriched	enriched	NA	enriched	NA	enriched	NA	enriched	NA	10	0
ARSD	enriched	NA	NA	enriched	enriched	enriched	enriched	enriched	NA	enriched	NA	NA	enriched	enriched	enriched	NA	NA	NA	NA	NA	NA	NA	10	0
C21orf58	enriched	enriched	enriched	NA	NA	enriched	NA	NA	NA	NA	enriched	enriched	enriched	enriched	NA	NA	enriched	NA	NA	NA	NA	enriched	10	0
CDC14B	enriched	NA	enriched	NA	NA	NA	enriched	enriched	NA	NA	NA	NA	enriched	enriched	enriched	NA	enriched	enriched	enriched	NA	NA	NA	10	0
CHAMP1	NA	enriched	enriched	enriched	NA	NA	enriched	NA	enriched	enriched	NA	NA	enriched	NA	NA	NA	NA	enriched	NA	enriched	NA	enriched	10	0
DHRS12	enriched	enriched	NA	enriched	NA	NA	enriched	enriched	NA	NA	enriched	enriched	enriched	NA	enriched	NA	enriched	NA	NA	NA	NA	NA	10	0
ERV3-1-ZNF117	NA	NA	enriched	NA	enriched	enriched	NA	NA	NA	enriched	enriched	enriched	enriched	enriched	enriched	NA	NA	NA	NA	NA	enriched	NA	10	0
IMMP1L	NA	enriched	enriched	NA	NA	enriched	NA	NA	NA	NA	NA	NA	enriched	enriched	NA	enriched	enriched	NA	enriched	NA	enriched	enriched	10	0
LY75-CD302	enriched	NA	enriched	NA	enriched	enriched	NA	NA	NA	NA	NA	enriched	enriched	NA	NA	NA	enriched	NA	enriched	enriched	enriched	NA	10	0
MRPL35	NA	NA	enriched	NA	NA	enriched	NA	enriched	NA	enriched	NA	enriched	enriched	NA	enriched	enriched	NA	enriched	NA	NA	NA	enriched	10	0
PYGL	enriched	enriched	NA	enriched	enriched	NA	enriched	NA	NA	NA	enriched	enriched	enriched	NA	NA	NA	NA	enriched	NA	NA	NA	enriched	10	0
SEC22A	enriched	enriched	enriched	NA	enriched	NA	NA	NA	NA	NA	NA	NA	NA	enriched	NA	enriched	enriched	enriched	NA	NA	enriched	enriched	10	0
TTL	NA	enriched	enriched	NA	enriched	enriched	enriched	NA	NA	enriched	NA	enriched	enriched	enriched	NA	NA	NA	enriched	NA	NA	NA	NA	10	0
ASPH	enriched	NA	enriched	enriched	NA	NA	NA	enriched	NA	NA	enriched	enriched	NA	enriched	NA	enriched	NA	depleted	enriched	NA	NA	enriched	10	1
BET1	enriched	enriched	enriched	depleted	NA	enriched	NA	enriched	NA	NA	NA	NA	enriched	enriched	enriched	NA	NA	NA	NA	NA	enriched	enriched	10	1
BMX	enriched	enriched	enriched	enriched	enriched	NA	enriched	NA	depleted	NA	NA	enriched	enriched	NA	NA	NA	enriched	NA	NA	NA	enriched	NA	10	1
C22orf34	enriched	enriched	NA	enriched	enriched	enriched	NA	NA	NA	NA	enriched	NA	NA	enriched	enriched	NA	NA	NA	NA	enriched	depleted	enriched	10	1
C7orf49	enriched	NA	enriched	enriched	NA	NA	enriched	enriched	enriched	enriched	NA	NA	NA	NA	enriched	enriched	enriched	NA	NA	NA	depleted	NA	10	1
CELF2	enriched	enriched	enriched	NA	NA	enriched	enriched	NA	enriched	NA	NA	NA	enriched	NA	NA	enriched	NA	depleted	enriched	NA	NA	enriched	10	1
CHRNA5	NA	enriched	enriched	NA	enriched	enriched	NA	NA	NA	NA	NA	enriched	enriched	enriched	depleted	NA	enriched	enriched	enriched	NA	NA	NA	10	1
CMBL	enriched	NA	NA	NA	enriched	enriched	enriched	enriched	NA	NA	NA	enriched	enriched	depleted	enriched	NA	enriched	NA	NA	NA	enriched	NA	10	1
CRAT	enriched	NA	NA	NA	enriched	enriched	enriched	NA	enriched	NA	NA	enriched	NA	depleted	enriched	NA	NA	enriched	NA	NA	enriched	enriched	10	1
CSNK1E	enriched	enriched	enriched	NA	NA	NA	NA	enriched	NA	enriched	enriched	enriched	NA	enriched	depleted	enriched	NA	NA	NA	NA	NA	enriched	10	1
EXOSC3	enriched	enriched	enriched	NA	NA	enriched	NA	NA	NA	NA	NA	enriched	enriched	enriched	depleted	NA	NA	NA	enriched	NA	enriched	enriched	10	1
FILIP1	enriched	enriched	NA	depleted	NA	NA	enriched	enriched	NA	enriched	NA	enriched	enriched	NA	NA	NA	enriched	enriched	NA	NA	NA	enriched	10	1
FNBP1	enriched	enriched	enriched	NA	NA	NA	NA	enriched	NA	NA	NA	NA	enriched	depleted	NA	enriched	enriched	enriched	enriched	NA	NA	enriched	10	1
GRID2IP	NA	enriched	enriched	NA	NA	enriched	NA	enriched	NA	NA	NA	enriched	enriched	NA	depleted	NA	NA	NA	enriched	enriched	enriched	enriched	10	1
KMT5B	enriched	NA	NA	enriched	enriched	NA	enriched	enriched	NA	NA	NA	enriched	enriched	enriched	depleted	NA	enriched	NA	NA	NA	NA	enriched	10	1
LMBR1	enriched	enriched	enriched	depleted	NA	enriched	NA	enriched	NA	NA	NA	NA	enriched	NA	enriched	NA	NA	NA	NA	enriched	enriched	enriched	10	1
MCF2L2	NA	NA	enriched	enriched	NA	enriched	NA	enriched	NA	enriched	enriched	enriched	enriched	enriched	enriched	NA	NA	depleted	NA	NA	NA	NA	10	1
MFAP3L	enriched	NA	enriched	enriched	enriched	NA	NA	enriched	NA	NA	enriched	NA	enriched	NA	depleted	NA	NA	enriched	NA	enriched	NA	enriched	10	1
MINDY4	enriched	enriched	enriched	NA	enriched	NA	enriched	enriched	depleted	NA	NA	enriched	enriched	enriched	NA	NA	NA	enriched	NA	NA	NA	NA	10	1
PDE4DIP	enriched	enriched	enriched	enriched	NA	NA	NA	enriched	NA	NA	NA	enriched	NA	NA	depleted	enriched	NA	enriched	NA	NA	enriched	enriched	10	1
PPAN-P2RY11	enriched	NA	enriched	NA	NA	enriched	enriched	enriched	enriched	NA	NA	enriched	enriched	NA	depleted	enriched	NA	NA	enriched	NA	NA	NA	10	1
PRMT7	NA	NA	enriched	NA	enriched	enriched	enriched	enriched	NA	NA	enriched	enriched	enriched	NA	depleted	NA	enriched	NA	NA	enriched	NA	NA	10	1
RAD51B	enriched	enriched	enriched	NA	enriched	NA	NA	NA	NA	NA	NA	enriched	enriched	enriched	NA	NA	enriched	depleted	NA	NA	enriched	enriched	10	1
SCAI	NA	enriched	enriched	NA	NA	enriched	NA	NA	enriched	NA	NA	enriched	enriched	enriched	depleted	NA	NA	NA	NA	enriched	enriched	enriched	10	1
SEC14L1	NA	NA	NA	enriched	enriched	NA	NA	NA	NA	NA	enriched	enriched	enriched	enriched	enriched	enriched	enriched	enriched	NA	depleted	NA	NA	10	1
SLC2A11	NA	enriched	enriched	enriched	NA	NA	NA	NA	enriched	enriched	enriched	enriched	enriched	enriched	depleted	NA	NA	enriched	NA	NA	NA	NA	10	1
SP100	enriched	NA	enriched	NA	NA	NA	NA	enriched	NA	NA	NA	enriched	enriched	enriched	enriched	NA	depleted	enriched	NA	enriched	enriched	NA	10	1
SYN2	NA	enriched	enriched	NA	enriched	NA	NA	NA	enriched	enriched	NA	enriched	NA	depleted	NA	NA	NA	enriched	enriched	enriched	enriched	NA	10	1
ZNF800	enriched	enriched	enriched	NA	NA	enriched	enriched	depleted	NA	NA	NA	enriched	enriched	enriched	NA	NA	enriched	NA	NA	NA	NA	enriched	10	1
ZNF846	enriched	enriched	enriched	NA	NA	enriched	NA	NA	NA	enriched	NA	NA	NA	enriched	depleted	enriched	NA	NA	enriched	enriched	NA	enriched	10	1
ATP5S	enriched	enriched	enriched	depleted	enriched	NA	NA	enriched	NA	depleted	enriched	enriched	enriched	NA	NA	NA	NA	NA	NA	NA	enriched	enriched	10	2
ATRX	enriched	NA	enriched	NA	enriched	enriched	enriched	depleted	NA	NA	NA	enriched	enriched	enriched	depleted	NA	NA	NA	enriched	NA	NA	enriched	10	2
C2CD3	enriched	NA	NA	NA	enriched	enriched	enriched	enriched	enriched	NA	NA	NA	enriched	enriched	depleted	NA	NA	enriched	NA	depleted	NA	enriched	10	2
CAMK1D	enriched	enriched	enriched	depleted	enriched	NA	enriched	NA	NA	NA	NA	enriched	enriched	NA	depleted	NA	enriched	NA	NA	enriched	NA	enriched	10	2
CEP78	enriched	enriched	enriched	enriched	NA	enriched	NA	NA	NA	enriched	enriched	enriched	NA	NA	depleted	depleted	NA	NA	NA	enriched	NA	enriched	10	2
CHMP3	NA	enriched	enriched	depleted	enriched	NA	NA	NA	enriched	enriched	NA	enriched	enriched	depleted	NA	NA	enriched	NA	NA	NA	enriched	enriched	10	2
CHST15	enriched	enriched	enriched	depleted	enriched	enriched	NA	NA	NA	enriched	NA	enriched	NA	depleted	enriched	NA	NA	NA	enriched	NA	NA	enriched	10	2
CRBN	enriched	NA	enriched	NA	NA	enriched	enriched	depleted	NA	NA	NA	enriched	enriched	NA	NA	NA	enriched	enriched	NA	enriched	depleted	enriched	10	2
FAHD1	NA	enriched	NA	enriched	enriched	enriched	NA	enriched	NA	enriched	NA	NA	NA	enriched	enriched	NA	enriched	depleted	enriched	NA	depleted	NA	10	2
FAM234A	enriched	NA	enriched	NA	enriched	enriched	enriched	enriched	NA	NA	NA	NA	enriched	NA	depleted	NA	enriched	NA	enriched	depleted	enriched	NA	10	2
GABPB2	enriched	enriched	enriched	enriched	NA	NA	NA	NA	depleted	NA	enriched	enriched	enriched	enriched	enriched	NA	NA	depleted	NA	NA	NA	enriched	10	2
GIGYF2	enriched	NA	enriched	NA	enriched	NA	NA	NA	depleted	NA	enriched	enriched	enriched	enriched	NA	NA	NA	enriched	NA	depleted	enriched	enriched	10	2
GRAMD1A	NA	NA	enriched	enriched	enriched	enriched	enriched	NA	NA	NA	NA	enriched	enriched	enriched	NA	depleted	enriched	depleted	enriched	NA	NA	NA	10	2
KCNMB3	NA	enriched	NA	enriched	enriched	enriched	NA	NA	NA	NA	enriched	enriched	NA	enriched	depleted	NA	enriched	NA	enriched	depleted	NA	enriched	10	2
NOVA1	enriched	enriched	NA	NA	NA	enriched	NA	enriched	depleted	NA	NA	NA	enriched	enriched	enriched	NA	NA	depleted	NA	enriched	enriched	enriched	10	2
OPTN	enriched	enriched	enriched	enriched	NA	NA	enriched	enriched	NA	NA	NA	enriched	enriched	enriched	depleted	NA	NA	depleted	NA	NA	NA	enriched	10	2
PBLD	NA	NA	enriched	NA	enriched	enriched	NA	enriched	NA	enriched	NA	NA	enriched	NA	enriched	depleted	enriched	enriched	NA	depleted	enriched	NA	10	2
PCDH7	enriched	enriched	enriched	NA	enriched	enriched	NA	NA	NA	NA	NA	enriched	enriched	NA	depleted	NA	enriched	depleted	enriched	NA	NA	enriched	10	2
PML	enriched	enriched	enriched	NA	enriched	enriched	NA	enriched	NA	NA	NA	NA	NA	NA	depleted	enriched	enriched	depleted	NA	NA	enriched	enriched	10	2
PPHLN1	NA	NA	enriched	depleted	enriched	enriched	NA	enriched	NA	NA	NA	NA	enriched	enriched	NA	enriched	enriched	enriched	NA	depleted	NA	enriched	10	2
PPP1R3F	enriched	NA	NA	enriched	enriched	NA	NA	NA	NA	NA	enriched	enriched	enriched	NA	depleted	enriched	enriched	depleted	enriched	NA	NA	enriched	10	2
PTCHD4	NA	enriched	enriched	enriched	enriched	NA	NA	NA	NA	NA	NA	enriched	enriched	depleted	NA	enriched	enriched	depleted	enriched	NA	NA	enriched	10	2
PTPRJ	NA	NA	enriched	depleted	enriched	enriched	enriched	NA	NA	NA	depleted	enriched	enriched	NA	NA	NA	NA	enriched	NA	enriched	enriched	enriched	10	2
RCOR3	enriched	enriched	enriched	depleted	enriched	enriched	enriched	NA	NA	NA	NA	enriched	enriched	NA	NA	NA	NA	depleted	NA	NA	enriched	enriched	10	2
RNF180	enriched	enriched	enriched	NA	enriched	NA	enriched	depleted	NA	NA	NA	enriched	enriched	NA	depleted	NA	enriched	enriched	NA	NA	NA	enriched	10	2
SLC35F1	enriched	NA	enriched	depleted	enriched	NA	NA	enriched	NA	enriched	NA	NA	NA	enriched	depleted	NA	enriched	NA	enriched	NA	enriched	enriched	10	2
SPRTN	enriched	enriched	NA	enriched	enriched	NA	enriched	depleted	depleted	NA	NA	NA	NA	NA	enriched	NA	enriched	enriched	enriched	NA	NA	enriched	10	2
TANC1	enriched	NA	enriched	depleted	enriched	NA	NA	NA	enriched	enriched	NA	enriched	enriched	NA	depleted	NA	NA	enriched	NA	NA	enriched	enriched	10	2
ULK4	NA	enriched	enriched	depleted	enriched	enriched	NA	NA	NA	NA	NA	enriched	enriched	enriched	depleted	NA	NA	NA	enriched	NA	enriched	enriched	10	2
VWA8	enriched	enriched	enriched	NA	enriched	NA	enriched	NA	depleted	NA	NA	enriched	enriched	NA	depleted	NA	NA	NA	enriched	enriched	NA	enriched	10	2
WBP2NL	enriched	enriched	enriched	NA	NA	enriched	NA	NA	NA	NA	NA	enriched	enriched	NA	depleted	enriched	NA	depleted	enriched	NA	enriched	enriched	10	2
ZNF197	enriched	NA	enriched	enriched	NA	enriched	NA	enriched	NA	enriched	enriched	enriched	NA	enriched	depleted	NA	depleted	enriched	NA	NA	NA	NA	10	2
ADCY3	enriched	NA	enriched	enriched	depleted	NA	NA	NA	depleted	NA	enriched	enriched	enriched	enriched	depleted	enriched	NA	NA	NA	NA	enriched	enriched	10	3
C21orf33	NA	NA	enriched	enriched	enriched	NA	NA	NA	enriched	NA	enriched	enriched	NA	NA	depleted	enriched	enriched	depleted	NA	enriched	depleted	enriched	10	3
CBWD2	enriched	enriched	enriched	depleted	enriched	NA	enriched	NA	NA	NA	NA	enriched	enriched	depleted	NA	NA	depleted	enriched	enriched	NA	NA	enriched	10	3
CCDC50	enriched	enriched	enriched	NA	enriched	depleted	NA	enriched	NA	NA	NA	enriched	enriched	depleted	depleted	enriched	NA	NA	enriched	NA	NA	enriched	10	3
CYB561D2	NA	NA	NA	depleted	NA	enriched	enriched	enriched	enriched	enriched	NA	enriched	enriched	depleted	depleted	NA	enriched	enriched	enriched	NA	NA	NA	10	3
FAM120C	enriched	NA	enriched	NA	enriched	NA	enriched	NA	enriched	enriched	NA	enriched	enriched	depleted	depleted	NA	enriched	depleted	NA	NA	NA	enriched	10	3
IKBIP	enriched	enriched	NA	enriched	enriched	enriched	enriched	depleted	NA	depleted	NA	NA	enriched	NA	enriched	NA	enriched	enriched	NA	depleted	NA	NA	10	3
KIAA0586	enriched	NA	depleted	NA	enriched	enriched	enriched	enriched	NA	NA	NA	enriched	enriched	NA	depleted	NA	enriched	enriched	NA	NA	depleted	enriched	10	3
MOCOS	NA	enriched	depleted	enriched	NA	NA	NA	enriched	NA	enriched	enriched	NA	NA	depleted	enriched	enriched	NA	enriched	depleted	NA	enriched	enriched	10	3
PDE3A	enriched	enriched	enriched	NA	enriched	depleted	NA	enriched	NA	enriched	NA	NA	enriched	depleted	depleted	NA	enriched	NA	NA	NA	enriched	enriched	10	3
PDK3	enriched	enriched	enriched	depleted	NA	NA	NA	enriched	NA	enriched	NA	enriched	enriched	depleted	depleted	NA	enriched	enriched	NA	NA	NA	enriched	10	3
PPP2R1B	enriched	enriched	enriched	depleted	depleted	enriched	enriched	NA	NA	NA	NA	enriched	enriched	NA	NA	NA	NA	depleted	enriched	NA	enriched	enriched	10	3
PRDM2	NA	enriched	enriched	enriched	NA	NA	NA	depleted	depleted	enriched	NA	enriched	enriched	NA	depleted	NA	enriched	NA	enriched	NA	enriched	enriched	10	3
PRKAR1B	enriched	enriched	NA	NA	enriched	depleted	NA	enriched	NA	NA	enriched	enriched	enriched	enriched	depleted	enriched	NA	enriched	NA	depleted	NA	NA	10	3
RBM19	NA	enriched	enriched	depleted	NA	enriched	enriched	NA	NA	NA	depleted	enriched	enriched	NA	depleted	NA	NA	enriched	enriched	enriched	NA	enriched	10	3
RBM33	enriched	enriched	enriched	depleted	NA	enriched	enriched	NA	NA	NA	NA	NA	enriched	enriched	depleted	NA	NA	depleted	NA	enriched	enriched	enriched	10	3
SLC35F5	enriched	NA	enriched	NA	NA	enriched	enriched	depleted	depleted	NA	NA	enriched	enriched	NA	enriched	depleted	NA	enriched	enriched	NA	enriched	NA	10	3
SNX13	enriched	enriched	enriched	NA	depleted	enriched	NA	NA	NA	depleted	NA	enriched	enriched	enriched	depleted	enriched	NA	enriched	NA	NA	enriched	NA	10	3
TTF2	enriched	NA	enriched	depleted	NA	enriched	enriched	enriched	NA	depleted	NA	NA	NA	enriched	enriched	enriched	depleted	enriched	enriched	NA	NA	NA	10	3
USP31	NA	enriched	enriched	enriched	enriched	enriched	enriched	NA	depleted	NA	NA	enriched	enriched	NA	depleted	NA	NA	depleted	enriched	NA	NA	enriched	10	3
ZNF273	enriched	enriched	NA	NA	NA	NA	enriched	depleted	depleted	depleted	NA	enriched	enriched	enriched	enriched	NA	NA	NA	enriched	NA	enriched	enriched	10	3
ZNF346	enriched	NA	NA	enriched	enriched	enriched	NA	NA	depleted	depleted	enriched	enriched	enriched	NA	enriched	NA	enriched	NA	NA	NA	depleted	enriched	10	3
FAM189A1	NA	NA	NA	depleted	enriched	enriched	NA	enriched	NA	NA	NA	enriched	enriched	depleted	depleted	depleted	enriched	enriched	enriched	enriched	enriched	NA	10	4
FBXL14	enriched	enriched	enriched	enriched	NA	enriched	NA	depleted	depleted	enriched	NA	enriched	NA	depleted	depleted	NA	NA	NA	enriched	NA	enriched	enriched	10	4
GFOD1	enriched	enriched	enriched	depleted	NA	enriched	NA	depleted	depleted	NA	depleted	enriched	enriched	enriched	enriched	NA	NA	enriched	enriched	NA	NA	NA	10	4
INF2	enriched	enriched	enriched	enriched	enriched	NA	NA	enriched	depleted	NA	enriched	enriched	enriched	depleted	depleted	NA	NA	enriched	NA	depleted	NA	NA	10	4
PLEKHA7	NA	NA	depleted	enriched	enriched	enriched	enriched	enriched	enriched	enriched	NA	NA	NA	depleted	depleted	NA	enriched	NA	NA	enriched	enriched	depleted	10	4
SEH1L	enriched	NA	enriched	NA	enriched	enriched	enriched	depleted	NA	NA	NA	enriched	enriched	depleted	depleted	NA	NA	enriched	enriched	depleted	NA	enriched	10	4
TSFM	enriched	enriched	enriched	depleted	enriched	NA	NA	NA	NA	NA	depleted	enriched	enriched	NA	depleted	NA	enriched	depleted	enriched	enriched	NA	enriched	10	4
ANKRD17	enriched	enriched	enriched	depleted	enriched	enriched	NA	depleted	depleted	depleted	depleted	NA	enriched	NA	NA	NA	enriched	enriched	enriched	NA	NA	enriched	10	5
CREM	enriched	enriched	enriched	enriched	depleted	depleted	NA	NA	depleted	NA	enriched	enriched	enriched	enriched	depleted	enriched	NA	depleted	NA	NA	NA	enriched	10	5
NUDT15	enriched	enriched	enriched	NA	depleted	enriched	NA	NA	depleted	depleted	NA	enriched	enriched	enriched	NA	NA	depleted	depleted	enriched	NA	enriched	enriched	10	5
POU6F1	enriched	enriched	enriched	enriched	enriched	depleted	NA	NA	depleted	NA	enriched	NA	enriched	enriched	depleted	NA	NA	depleted	NA	depleted	enriched	enriched	10	5
NIT1	enriched	enriched	enriched	depleted	depleted	enriched	NA	NA	NA	enriched	depleted	enriched	NA	NA	depleted	NA	depleted	depleted	enriched	enriched	enriched	enriched	10	6
ABCA10	NA	enriched	enriched	enriched	NA	NA	enriched	NA	NA	NA	enriched	NA	enriched	NA	NA	NA	enriched	enriched	NA	NA	enriched	NA	9	0
ABCB9	NA	enriched	NA	NA	enriched	enriched	enriched	NA	NA	enriched	NA	NA	enriched	NA	NA	NA	enriched	NA	enriched	NA	NA	enriched	9	0
ACSF3	enriched	NA	NA	enriched	enriched	NA	NA	enriched	enriched	NA	NA	NA	NA	enriched	enriched	NA	NA	enriched	NA	NA	NA	enriched	9	0
ANKRD16	enriched	enriched	enriched	NA	NA	enriched	enriched	NA	NA	NA	NA	enriched	enriched	NA	NA	NA	NA	NA	enriched	NA	NA	enriched	9	0
ANXA11	enriched	enriched	enriched	NA	enriched	NA	enriched	NA	NA	NA	NA	enriched	enriched	NA	NA	NA	NA	NA	NA	NA	enriched	enriched	9	0
ARHGEF17	enriched	enriched	enriched	enriched	enriched	NA	NA	NA	NA	NA	NA	enriched	enriched	NA	NA	NA	enriched	NA	NA	NA	NA	enriched	9	0
BPTF	enriched	enriched	enriched	NA	NA	enriched	NA	NA	NA	NA	NA	enriched	enriched	NA	NA	NA	NA	enriched	enriched	NA	NA	enriched	9	0
CFAP44	enriched	enriched	enriched	NA	enriched	NA	enriched	NA	NA	enriched	NA	NA	NA	NA	NA	enriched	enriched	NA	enriched	NA	NA	NA	9	0
CYP39A1	enriched	NA	NA	enriched	NA	enriched	NA	NA	NA	enriched	enriched	NA	enriched	NA	enriched	NA	NA	NA	NA	enriched	NA	enriched	9	0
DIP2A	NA	NA	enriched	enriched	enriched	NA	NA	enriched	NA	enriched	NA	NA	NA	enriched	enriched	NA	NA	NA	NA	enriched	enriched	NA	9	0
FEZ1	NA	NA	enriched	enriched	enriched	NA	NA	enriched	NA	enriched	NA	enriched	enriched	NA	NA	NA	NA	enriched	NA	enriched	NA	NA	9	0
FTCDNL1	NA	enriched	NA	NA	NA	enriched	enriched	NA	NA	NA	NA	enriched	enriched	NA	NA	enriched	enriched	NA	enriched	NA	NA	enriched	9	0
KIAA1456	enriched	enriched	NA	NA	enriched	NA	enriched	NA	NA	NA	NA	enriched	enriched	enriched	NA	enriched	NA	enriched	NA	NA	NA	NA	9	0
KLF3	enriched	NA	enriched	enriched	NA	NA	NA	NA	NA	NA	NA	NA	enriched	enriched	enriched	NA	enriched	enriched	NA	NA	NA	enriched	9	0
LMNA	NA	enriched	enriched	NA	enriched	NA	NA	NA	NA	enriched	enriched	NA	NA	enriched	enriched	NA	enriched	NA	NA	NA	NA	enriched	9	0
NAALADL2	enriched	NA	enriched	enriched	NA	enriched	NA	enriched	NA	NA	enriched	NA	enriched	NA	NA	NA	NA	NA	NA	NA	enriched	enriched	9	0
PACS2	enriched	NA	enriched	NA	enriched	enriched	enriched	NA	NA	NA	NA	enriched	enriched	enriched	NA	NA	enriched	NA	NA	NA	NA	NA	9	0
PAIP2	enriched	enriched	enriched	enriched	NA	NA	NA	enriched	NA	NA	NA	NA	NA	enriched	NA	enriched	NA	NA	NA	enriched	NA	enriched	9	0
PLCB3	enriched	NA	NA	enriched	NA	enriched	enriched	NA	NA	enriched	NA	NA	enriched	NA	NA	NA	NA	NA	enriched	enriched	NA	enriched	9	0
PPFIA1	NA	enriched	enriched	NA	enriched	NA	NA	NA	NA	NA	NA	enriched	enriched	enriched	enriched	NA	enriched	NA	NA	NA	NA	enriched	9	0
RGS5	NA	enriched	enriched	NA	enriched	NA	enriched	NA	NA	enriched	NA	enriched	enriched	NA	NA	NA	NA	enriched	NA	NA	enriched	NA	9	0
SPG7	enriched	NA	NA	NA	NA	NA	enriched	enriched	enriched	enriched	enriched	NA	NA	enriched	NA	NA	enriched	enriched	NA	NA	NA	NA	9	0
TANK	enriched	NA	NA	enriched	enriched	NA	NA	NA	NA	NA	enriched	enriched	enriched	NA	NA	NA	enriched	enriched	NA	NA	NA	enriched	9	0
TMEM116	enriched	NA	NA	enriched	enriched	enriched	NA	enriched	NA	NA	NA	enriched	NA	enriched	NA	NA	enriched	NA	NA	enriched	NA	NA	9	0
TRIM7	NA	NA	enriched	NA	enriched	enriched	NA	enriched	NA	NA	NA	NA	enriched	NA	enriched	NA	NA	enriched	enriched	NA	enriched	NA	9	0
WLS	enriched	NA	NA	NA	enriched	enriched	NA	NA	NA	NA	NA	enriched	enriched	enriched	NA	enriched	enriched	NA	NA	NA	enriched	NA	9	0
ZNF765	NA	enriched	enriched	enriched	NA	NA	NA	NA	NA	NA	NA	enriched	enriched	NA	enriched	NA	NA	enriched	NA	NA	enriched	enriched	9	0
ATG10	enriched	enriched	enriched	NA	enriched	enriched	enriched	NA	NA	NA	NA	enriched	enriched	NA	depleted	NA	NA	NA	NA	NA	NA	enriched	9	1
BACH2	NA	NA	enriched	NA	enriched	NA	NA	enriched	enriched	enriched	NA	NA	enriched	enriched	NA	NA	enriched	depleted	NA	NA	NA	enriched	9	1
CBX1	NA	enriched	NA	enriched	NA	NA	NA	depleted	NA	NA	enriched	enriched	enriched	NA	enriched	NA	enriched	enriched	NA	NA	enriched	NA	9	1
CLN3	NA	enriched	enriched	NA	NA	enriched	NA	NA	NA	depleted	NA	NA	NA	enriched	enriched	enriched	NA	NA	NA	enriched	enriched	enriched	9	1
CYP3A5	NA	enriched	NA	NA	NA	NA	enriched	NA	depleted	NA	NA	enriched	enriched	NA	enriched	enriched	NA	enriched	NA	NA	enriched	enriched	9	1
DIXDC1	NA	enriched	enriched	NA	enriched	enriched	NA	NA	NA	NA	enriched	NA	enriched	enriched	depleted	enriched	NA	NA	NA	NA	NA	enriched	9	1
DLGAP2	enriched	NA	NA	enriched	NA	NA	enriched	NA	NA	NA	enriched	enriched	enriched	depleted	enriched	NA	enriched	NA	NA	NA	NA	enriched	9	1
ERCC6L2	enriched	enriched	enriched	NA	NA	NA	NA	NA	depleted	NA	NA	enriched	enriched	enriched	NA	enriched	NA	enriched	enriched	NA	NA	NA	9	1
FAN1	enriched	enriched	NA	depleted	enriched	NA	enriched	enriched	NA	NA	NA	enriched	enriched	enriched	NA	NA	NA	NA	enriched	NA	NA	NA	9	1
GABRB3	NA	enriched	enriched	NA	enriched	depleted	enriched	NA	enriched	enriched	NA	NA	enriched	NA	NA	NA	NA	NA	enriched	enriched	NA	NA	9	1
HAGH	enriched	NA	enriched	enriched	enriched	NA	NA	NA	NA	NA	NA	enriched	enriched	NA	depleted	NA	enriched	NA	NA	NA	enriched	enriched	9	1
HNRNPA3	enriched	enriched	enriched	NA	NA	enriched	NA	NA	NA	NA	enriched	enriched	enriched	depleted	NA	NA	NA	NA	enriched	NA	NA	enriched	9	1
HOMEZ	enriched	NA	enriched	NA	enriched	enriched	NA	NA	NA	NA	NA	enriched	enriched	enriched	NA	NA	NA	depleted	enriched	enriched	NA	NA	9	1
IFT88	enriched	enriched	enriched	NA	enriched	NA	NA	NA	NA	NA	NA	enriched	enriched	depleted	NA	NA	enriched	NA	enriched	NA	NA	enriched	9	1
KIDINS220	enriched	enriched	enriched	NA	NA	NA	enriched	NA	NA	NA	enriched	enriched	enriched	enriched	NA	NA	NA	enriched	NA	depleted	NA	NA	9	1
LMF1	NA	NA	NA	enriched	enriched	enriched	NA	enriched	NA	enriched	NA	enriched	enriched	depleted	NA	NA	enriched	enriched	NA	NA	NA	NA	9	1
LRRC27	enriched	NA	enriched	NA	enriched	enriched	enriched	enriched	NA	NA	NA	NA	enriched	NA	NA	NA	enriched	enriched	NA	NA	depleted	NA	9	1
MAPK9	enriched	enriched	enriched	NA	enriched	NA	NA	enriched	depleted	NA	NA	NA	enriched	NA	NA	enriched	NA	NA	enriched	NA	enriched	NA	9	1
NIN	enriched	enriched	enriched	NA	NA	NA	NA	enriched	enriched	NA	NA	enriched	enriched	NA	depleted	enriched	NA	NA	NA	NA	NA	enriched	9	1
NPM1	enriched	enriched	enriched	NA	NA	enriched	NA	NA	NA	NA	enriched	NA	enriched	NA	NA	NA	enriched	enriched	enriched	depleted	NA	NA	9	1
OSCP1	enriched	NA	enriched	NA	NA	NA	NA	enriched	NA	NA	NA	enriched	enriched	NA	depleted	NA	NA	NA	enriched	enriched	enriched	enriched	9	1
PBX1	NA	NA	enriched	NA	enriched	NA	NA	enriched	depleted	NA	NA	enriched	enriched	NA	enriched	enriched	enriched	enriched	NA	NA	NA	NA	9	1
PDK2	enriched	enriched	enriched	NA	enriched	enriched	NA	NA	NA	NA	enriched	enriched	enriched	NA	depleted	NA	NA	NA	NA	NA	NA	enriched	9	1
PDLIM7	enriched	NA	enriched	depleted	enriched	NA	NA	enriched	NA	NA	NA	enriched	NA	NA	enriched	NA	enriched	NA	enriched	NA	NA	enriched	9	1
PRDM5	NA	enriched	enriched	NA	enriched	NA	enriched	enriched	NA	NA	NA	NA	enriched	NA	enriched	NA	NA	enriched	enriched	depleted	NA	NA	9	1
RPGRIP1L	NA	enriched	enriched	NA	enriched	NA	NA	enriched	depleted	NA	NA	enriched	enriched	enriched	NA	NA	NA	enriched	NA	NA	NA	enriched	9	1
RPS10-NUDT3	NA	NA	enriched	NA	enriched	NA	NA	NA	enriched	enriched	NA	enriched	enriched	enriched	depleted	enriched	NA	NA	NA	NA	NA	enriched	9	1
SYNPO2	enriched	NA	NA	NA	enriched	NA	enriched	NA	NA	enriched	NA	enriched	NA	NA	NA	NA	enriched	depleted	NA	enriched	enriched	enriched	9	1
TMBIM4	NA	NA	NA	enriched	enriched	NA	enriched	NA	enriched	enriched	NA	NA	enriched	NA	depleted	NA	enriched	enriched	NA	NA	NA	enriched	9	1
TSNARE1	NA	NA	NA	enriched	NA	enriched	enriched	enriched	enriched	enriched	NA	NA	NA	depleted	enriched	NA	NA	enriched	enriched	NA	NA	NA	9	1
UBE3B	enriched	NA	NA	enriched	enriched	NA	NA	enriched	NA	NA	enriched	NA	enriched	enriched	enriched	NA	NA	NA	NA	depleted	NA	enriched	9	1
VPS53	NA	NA	NA	NA	enriched	enriched	NA	NA	enriched	NA	NA	enriched	enriched	enriched	depleted	NA	NA	enriched	NA	enriched	enriched	NA	9	1
VRK2	NA	enriched	NA	NA	enriched	enriched	enriched	NA	NA	enriched	NA	enriched	enriched	NA	enriched	NA	depleted	enriched	NA	NA	NA	NA	9	1
ZNF528	enriched	enriched	NA	NA	NA	NA	NA	enriched	enriched	enriched	NA	enriched	enriched	enriched	NA	NA	NA	depleted	NA	NA	NA	enriched	9	1
ZNF98	NA	NA	NA	NA	enriched	NA	NA	NA	enriched	enriched	NA	NA	NA	enriched	enriched	enriched	enriched	depleted	enriched	NA	NA	enriched	9	1
ACAD8	enriched	depleted	enriched	NA	enriched	enriched	enriched	enriched	enriched	NA	NA	NA	NA	NA	enriched	depleted	NA	enriched	NA	NA	NA	NA	9	2
B3GNTL1	NA	NA	NA	enriched	enriched	NA	NA	enriched	enriched	enriched	enriched	NA	NA	enriched	NA	NA	enriched	NA	enriched	NA	depleted	depleted	9	2
CCDC138	enriched	NA	NA	depleted	enriched	enriched	NA	enriched	NA	depleted	NA	enriched	enriched	NA	NA	NA	enriched	enriched	NA	NA	NA	enriched	9	2
CCDC173	NA	NA	NA	enriched	NA	NA	NA	depleted	depleted	enriched	NA	enriched	enriched	enriched	enriched	enriched	NA	enriched	enriched	NA	NA	NA	9	2
CCDC40	NA	NA	enriched	NA	enriched	NA	enriched	enriched	NA	NA	NA	NA	enriched	NA	depleted	NA	enriched	depleted	enriched	enriched	NA	enriched	9	2
CGREF1	enriched	NA	depleted	NA	enriched	NA	NA	NA	NA	NA	NA	enriched	enriched	enriched	enriched	enriched	enriched	enriched	NA	NA	depleted	NA	9	2
EGLN3	enriched	NA	enriched	NA	enriched	enriched	enriched	depleted	depleted	NA	NA	NA	NA	enriched	NA	NA	enriched	enriched	NA	NA	NA	enriched	9	2
FAM177A1	enriched	enriched	enriched	enriched	NA	NA	NA	NA	NA	enriched	enriched	enriched	enriched	NA	depleted	NA	NA	depleted	NA	NA	NA	enriched	9	2
FGFR1OP2	enriched	NA	enriched	NA	enriched	NA	enriched	NA	enriched	enriched	enriched	NA	enriched	depleted	depleted	NA	NA	NA	NA	NA	NA	enriched	9	2
FUT10	enriched	enriched	enriched	depleted	enriched	enriched	NA	depleted	NA	NA	NA	enriched	NA	NA	enriched	enriched	NA	NA	NA	NA	NA	enriched	9	2
GIT2	enriched	NA	enriched	NA	enriched	enriched	enriched	depleted	NA	NA	NA	NA	enriched	depleted	enriched	NA	NA	NA	NA	enriched	enriched	NA	9	2
GOLGA3	enriched	NA	enriched	depleted	enriched	enriched	enriched	enriched	NA	NA	NA	enriched	enriched	NA	depleted	NA	NA	NA	NA	NA	NA	enriched	9	2
HDAC9	NA	enriched	NA	enriched	NA	enriched	enriched	NA	NA	enriched	NA	enriched	NA	enriched	enriched	NA	depleted	depleted	NA	enriched	NA	NA	9	2
HIP1R	enriched	NA	NA	enriched	enriched	NA	enriched	enriched	NA	enriched	NA	NA	enriched	enriched	depleted	NA	enriched	NA	NA	NA	depleted	NA	9	2
KIAA2026	enriched	NA	enriched	NA	NA	enriched	NA	NA	NA	NA	NA	NA	enriched	enriched	depleted	enriched	NA	depleted	enriched	NA	enriched	enriched	9	2
MTA3	NA	enriched	enriched	depleted	NA	NA	NA	NA	NA	NA	NA	enriched	enriched	enriched	depleted	enriched	enriched	NA	NA	enriched	NA	enriched	9	2
NUP88	enriched	NA	enriched	NA	enriched	enriched	NA	depleted	NA	NA	NA	enriched	enriched	NA	depleted	NA	enriched	NA	enriched	NA	NA	enriched	9	2
OPN3	NA	NA	depleted	NA	enriched	enriched	NA	enriched	NA	enriched	NA	enriched	enriched	enriched	enriched	NA	enriched	NA	NA	depleted	NA	NA	9	2
PCLO	NA	enriched	enriched	NA	enriched	enriched	NA	enriched	NA	NA	NA	NA	NA	NA	depleted	enriched	enriched	depleted	NA	enriched	NA	enriched	9	2
PEX13	enriched	NA	NA	enriched	enriched	NA	enriched	depleted	depleted	NA	enriched	NA	enriched	enriched	NA	NA	NA	enriched	NA	NA	enriched	NA	9	2
PHF7	NA	NA	NA	enriched	enriched	enriched	NA	NA	NA	NA	enriched	enriched	enriched	enriched	NA	depleted	enriched	enriched	NA	depleted	NA	NA	9	2
POLN	enriched	NA	depleted	enriched	NA	enriched	NA	enriched	enriched	enriched	NA	NA	NA	enriched	NA	NA	NA	enriched	NA	depleted	enriched	NA	9	2
PPP2R5C	enriched	enriched	enriched	depleted	enriched	enriched	NA	NA	NA	NA	NA	enriched	NA	NA	NA	NA	NA	depleted	NA	enriched	enriched	enriched	9	2
RALGPS1	NA	NA	NA	depleted	enriched	depleted	NA	enriched	enriched	enriched	NA	NA	enriched	NA	enriched	NA	NA	enriched	NA	enriched	enriched	NA	9	2
RNASE4	enriched	NA	enriched	depleted	NA	enriched	enriched	NA	NA	enriched	depleted	NA	NA	NA	NA	NA	NA	enriched	NA	enriched	enriched	enriched	9	2
SEC31A	NA	NA	enriched	enriched	enriched	enriched	NA	NA	NA	NA	NA	NA	NA	NA	enriched	depleted	enriched	enriched	enriched	depleted	NA	enriched	9	2
SMIM7	enriched	NA	enriched	depleted	NA	enriched	NA	NA	enriched	NA	NA	NA	NA	enriched	depleted	NA	NA	enriched	enriched	enriched	NA	enriched	9	2
SOD2	enriched	enriched	enriched	enriched	NA	NA	NA	depleted	NA	NA	enriched	NA	NA	depleted	enriched	NA	NA	enriched	NA	NA	enriched	enriched	9	2
SRCIN1	NA	NA	enriched	NA	enriched	enriched	NA	enriched	enriched	NA	enriched	NA	NA	enriched	NA	enriched	enriched	depleted	NA	depleted	NA	NA	9	2
SYT17	NA	NA	enriched	enriched	enriched	enriched	NA	depleted	enriched	enriched	enriched	NA	NA	depleted	NA	NA	enriched	NA	enriched	NA	NA	NA	9	2
TCEA2	enriched	NA	enriched	enriched	NA	enriched	enriched	NA	NA	NA	NA	enriched	enriched	enriched	depleted	NA	depleted	NA	enriched	NA	NA	NA	9	2
TRAPPC12	enriched	enriched	enriched	NA	enriched	enriched	enriched	depleted	NA	NA	NA	enriched	enriched	NA	NA	NA	NA	NA	enriched	NA	depleted	NA	9	2
AP3B2	enriched	NA	enriched	depleted	enriched	NA	NA	enriched	enriched	NA	NA	NA	NA	depleted	depleted	NA	enriched	enriched	enriched	NA	NA	enriched	9	3
ARMC9	NA	NA	enriched	depleted	NA	enriched	NA	enriched	enriched	NA	depleted	enriched	enriched	NA	NA	NA	NA	depleted	NA	enriched	enriched	enriched	9	3
BBS7	enriched	enriched	enriched	enriched	NA	enriched	NA	enriched	depleted	NA	NA	enriched	enriched	NA	NA	NA	depleted	depleted	NA	NA	NA	enriched	9	3
C1QTNF3	enriched	NA	NA	depleted	enriched	enriched	NA	enriched	NA	NA	NA	NA	NA	depleted	depleted	NA	enriched	enriched	enriched	NA	enriched	enriched	9	3
CHRM5	NA	enriched	enriched	NA	enriched	NA	NA	enriched	enriched	enriched	NA	depleted	depleted	enriched	NA	NA	enriched	enriched	depleted	NA	NA	NA	9	3
COX6C	enriched	enriched	NA	NA	enriched	NA	enriched	depleted	depleted	NA	NA	enriched	enriched	enriched	depleted	NA	enriched	NA	NA	NA	NA	enriched	9	3
CUL4A	enriched	NA	NA	enriched	enriched	enriched	NA	depleted	NA	NA	NA	enriched	enriched	depleted	enriched	NA	depleted	enriched	NA	NA	NA	enriched	9	3
DIAPH2	enriched	enriched	enriched	NA	enriched	enriched	NA	depleted	depleted	NA	NA	enriched	enriched	NA	depleted	NA	NA	NA	NA	NA	enriched	enriched	9	3
DMKN	NA	enriched	enriched	NA	enriched	NA	enriched	enriched	NA	enriched	NA	enriched	NA	enriched	NA	NA	enriched	depleted	NA	depleted	depleted	NA	9	3
DZIP1L	NA	enriched	enriched	depleted	NA	enriched	NA	enriched	NA	NA	NA	enriched	NA	enriched	depleted	enriched	NA	depleted	NA	NA	enriched	enriched	9	3
GAREM1	depleted	NA	depleted	NA	enriched	NA	enriched	enriched	NA	NA	enriched	NA	enriched	depleted	enriched	NA	enriched	enriched	NA	NA	enriched	NA	9	3
GRAMD1C	NA	NA	depleted	NA	enriched	enriched	enriched	NA	enriched	enriched	enriched	enriched	enriched	depleted	NA	NA	NA	depleted	NA	NA	enriched	NA	9	3
KAT14	NA	enriched	enriched	NA	NA	NA	enriched	enriched	NA	enriched	NA	enriched	NA	enriched	depleted	NA	depleted	depleted	enriched	NA	NA	enriched	9	3
MACROD2	enriched	enriched	enriched	NA	NA	NA	NA	enriched	enriched	NA	NA	NA	NA	depleted	depleted	enriched	enriched	enriched	NA	depleted	NA	enriched	9	3
MAP3K8	enriched	enriched	enriched	enriched	NA	NA	NA	NA	depleted	NA	NA	NA	NA	enriched	enriched	NA	depleted	depleted	NA	enriched	enriched	enriched	9	3
MYBBP1A	NA	enriched	enriched	depleted	depleted	enriched	enriched	NA	NA	NA	NA	enriched	enriched	NA	NA	NA	depleted	NA	enriched	NA	enriched	enriched	9	3
N6AMT1	NA	enriched	enriched	depleted	NA	enriched	enriched	enriched	NA	NA	NA	enriched	enriched	enriched	depleted	NA	depleted	enriched	NA	NA	NA	NA	9	3
NSUN7	enriched	NA	enriched	enriched	NA	NA	NA	NA	depleted	NA	enriched	enriched	enriched	enriched	depleted	NA	depleted	NA	NA	NA	enriched	enriched	9	3
POLR2F	enriched	enriched	enriched	NA	NA	enriched	enriched	NA	depleted	NA	NA	NA	NA	depleted	NA	enriched	enriched	NA	NA	depleted	enriched	enriched	9	3
RBM39	enriched	NA	NA	NA	enriched	enriched	enriched	enriched	NA	NA	NA	NA	enriched	depleted	NA	NA	enriched	enriched	enriched	depleted	depleted	NA	9	3
RNF214	enriched	NA	enriched	enriched	NA	depleted	NA	NA	NA	NA	enriched	enriched	enriched	NA	depleted	NA	NA	NA	enriched	depleted	enriched	enriched	9	3
TPK1	enriched	NA	enriched	NA	enriched	depleted	NA	NA	depleted	depleted	enriched	enriched	enriched	NA	NA	enriched	enriched	NA	NA	NA	NA	enriched	9	3
VWA5A	enriched	enriched	depleted	NA	NA	enriched	enriched	enriched	NA	NA	enriched	NA	enriched	depleted	depleted	NA	NA	NA	NA	NA	enriched	enriched	9	3
ZNF660-ZNF197	enriched	NA	enriched	enriched	NA	enriched	NA	enriched	NA	enriched	enriched	NA	NA	enriched	depleted	depleted	depleted	enriched	NA	NA	NA	NA	9	3
FKBP11	NA	enriched	NA	depleted	depleted	NA	NA	enriched	enriched	NA	depleted	enriched	enriched	NA	enriched	NA	depleted	enriched	enriched	NA	NA	enriched	9	4
FXR1	enriched	enriched	enriched	NA	NA	enriched	enriched	depleted	depleted	depleted	NA	enriched	enriched	enriched	enriched	NA	NA	depleted	NA	NA	NA	NA	9	4
ING3	enriched	NA	enriched	NA	NA	enriched	enriched	depleted	depleted	depleted	NA	enriched	enriched	enriched	depleted	NA	NA	enriched	NA	NA	NA	enriched	9	4
LRRFIP1	enriched	enriched	enriched	depleted	NA	NA	NA	NA	depleted	NA	depleted	enriched	enriched	NA	depleted	enriched	NA	NA	enriched	NA	enriched	enriched	9	4
PPIE	enriched	NA	NA	depleted	enriched	NA	enriched	enriched	depleted	NA	NA	NA	NA	depleted	depleted	NA	enriched	enriched	NA	enriched	enriched	enriched	9	4
SLC35G1	NA	enriched	enriched	depleted	NA	NA	NA	enriched	depleted	NA	depleted	enriched	enriched	enriched	depleted	enriched	NA	enriched	NA	NA	NA	enriched	9	4
TRDMT1	NA	enriched	NA	NA	NA	depleted	depleted	enriched	depleted	NA	NA	enriched	enriched	enriched	enriched	enriched	enriched	NA	depleted	enriched	NA	NA	9	4
ZFYVE28	enriched	NA	enriched	NA	enriched	enriched	enriched	depleted	depleted	NA	NA	enriched	enriched	NA	enriched	depleted	NA	NA	NA	depleted	NA	enriched	9	4
ZSCAN2	NA	enriched	enriched	depleted	enriched	enriched	enriched	NA	NA	NA	NA	NA	enriched	depleted	depleted	NA	NA	depleted	enriched	enriched	NA	enriched	9	4
APBA3	NA	depleted	depleted	NA	enriched	enriched	enriched	depleted	enriched	NA	NA	NA	enriched	depleted	enriched	NA	enriched	enriched	NA	depleted	enriched	NA	9	5
BLZF1	NA	NA	enriched	enriched	enriched	NA	NA	enriched	enriched	enriched	NA	NA	enriched	depleted	depleted	enriched	NA	depleted	NA	depleted	depleted	enriched	9	5
CSTF3	enriched	NA	enriched	depleted	enriched	NA	depleted	NA	depleted	depleted	NA	NA	NA	enriched	depleted	NA	NA	enriched	enriched	enriched	enriched	enriched	9	5
EIF2D	NA	NA	depleted	enriched	enriched	NA	enriched	NA	depleted	depleted	enriched	enriched	enriched	enriched	depleted	enriched	enriched	NA	NA	depleted	NA	NA	9	5
KCNK15	NA	depleted	depleted	NA	enriched	NA	enriched	depleted	NA	NA	NA	enriched	enriched	depleted	depleted	enriched	enriched	enriched	enriched	enriched	NA	NA	9	5
SLC11A2	enriched	NA	enriched	depleted	NA	NA	NA	NA	depleted	NA	NA	enriched	enriched	enriched	enriched	enriched	depleted	enriched	NA	depleted	depleted	enriched	9	5
SLC35D2	enriched	enriched	enriched	enriched	NA	NA	NA	NA	depleted	NA	NA	enriched	enriched	NA	depleted	depleted	depleted	depleted	NA	enriched	enriched	enriched	9	5
TDRKH	enriched	enriched	enriched	NA	NA	enriched	NA	NA	depleted	depleted	NA	NA	enriched	depleted	enriched	NA	NA	depleted	enriched	depleted	enriched	enriched	9	5
C5orf63	enriched	enriched	enriched	depleted	NA	enriched	NA	NA	depleted	depleted	depleted	enriched	NA	enriched	depleted	NA	depleted	NA	NA	enriched	enriched	enriched	9	6
TSEN2	depleted	NA	depleted	depleted	enriched	enriched	enriched	NA	enriched	NA	NA	depleted	enriched	NA	NA	NA	enriched	enriched	enriched	depleted	enriched	depleted	9	6
DGKH	NA	depleted	depleted	NA	enriched	NA	enriched	depleted	enriched	enriched	NA	depleted	NA	enriched	enriched	depleted	enriched	enriched	NA	enriched	depleted	depleted	9	7
ANKRD50	NA	NA	enriched	NA	enriched	NA	enriched	NA	NA	NA	NA	NA	enriched	enriched	NA	NA	enriched	enriched	NA	NA	NA	enriched	8	0
AP5M1	NA	NA	NA	NA	enriched	NA	enriched	NA	NA	NA	NA	enriched	enriched	enriched	NA	enriched	enriched	enriched	NA	NA	NA	NA	8	0
ARHGEF9	enriched	NA	enriched	NA	enriched	NA	NA	NA	NA	NA	NA	NA	NA	enriched	NA	enriched	enriched	enriched	NA	NA	NA	enriched	8	0
BOC	NA	enriched	enriched	NA	NA	NA	enriched	NA	NA	enriched	NA	NA	enriched	enriched	NA	NA	NA	NA	NA	enriched	NA	enriched	8	0
C8orf44	enriched	NA	enriched	NA	NA	NA	enriched	enriched	enriched	NA	NA	NA	enriched	NA	NA	NA	NA	NA	enriched	NA	NA	enriched	8	0
CACNA2D4	NA	enriched	enriched	NA	enriched	enriched	NA	NA	NA	enriched	NA	NA	NA	enriched	enriched	NA	NA	NA	NA	enriched	NA	NA	8	0
CASP8	NA	enriched	enriched	NA	NA	NA	enriched	NA	NA	NA	NA	enriched	enriched	enriched	NA	enriched	NA	NA	NA	NA	NA	enriched	8	0
DCT	enriched	enriched	enriched	NA	NA	NA	NA	NA	NA	NA	NA	NA	enriched	NA	NA	enriched	NA	NA	enriched	NA	enriched	enriched	8	0
FBXO32	NA	enriched	enriched	NA	enriched	NA	NA	NA	NA	NA	NA	NA	enriched	enriched	enriched	NA	enriched	NA	NA	NA	NA	enriched	8	0
FBXO36	enriched	NA	NA	NA	NA	NA	enriched	NA	NA	enriched	NA	enriched	enriched	NA	NA	NA	enriched	NA	NA	enriched	enriched	NA	8	0
GNL3	NA	NA	NA	enriched	NA	NA	NA	enriched	enriched	enriched	NA	enriched	enriched	NA	NA	NA	NA	NA	enriched	NA	NA	enriched	8	0
HGD	NA	enriched	NA	enriched	enriched	enriched	NA	enriched	NA	NA	NA	NA	NA	enriched	NA	NA	enriched	NA	NA	enriched	NA	NA	8	0
HYKK	NA	NA	enriched	enriched	NA	NA	enriched	enriched	NA	enriched	NA	NA	NA	NA	enriched	NA	NA	enriched	NA	NA	enriched	NA	8	0
KIAA0513	enriched	NA	enriched	NA	enriched	enriched	NA	enriched	NA	NA	NA	enriched	enriched	NA	NA	NA	enriched	NA	NA	NA	NA	NA	8	0
MTHFSD	NA	NA	NA	NA	enriched	NA	enriched	enriched	NA	enriched	NA	enriched	enriched	enriched	enriched	NA	NA	NA	NA	NA	NA	NA	8	0
PRKRIP1	enriched	enriched	NA	NA	enriched	NA	NA	enriched	enriched	NA	NA	NA	enriched	NA	enriched	NA	enriched	NA	NA	NA	NA	NA	8	0
RBM41	NA	NA	enriched	enriched	enriched	NA	NA	NA	enriched	enriched	NA	enriched	NA	NA	NA	NA	NA	enriched	NA	NA	NA	enriched	8	0
SLC24A1	enriched	NA	NA	NA	enriched	NA	NA	enriched	NA	enriched	NA	NA	NA	NA	NA	NA	enriched	enriched	enriched	NA	NA	enriched	8	0
SLC38A6	enriched	enriched	enriched	NA	NA	NA	enriched	enriched	NA	NA	NA	NA	enriched	enriched	NA	NA	NA	NA	NA	NA	NA	enriched	8	0
ST8SIA6	NA	NA	enriched	enriched	NA	NA	enriched	enriched	NA	NA	NA	NA	enriched	NA	NA	enriched	NA	NA	enriched	NA	NA	enriched	8	0
SYNCRIP	enriched	enriched	enriched	NA	NA	enriched	NA	NA	NA	NA	NA	NA	NA	NA	enriched	NA	NA	NA	enriched	enriched	NA	enriched	8	0
TAB1	NA	NA	NA	NA	NA	NA	NA	enriched	NA	enriched	NA	enriched	enriched	enriched	NA	NA	enriched	NA	enriched	NA	NA	enriched	8	0
TEX22	enriched	NA	NA	NA	enriched	NA	enriched	enriched	NA	NA	NA	NA	NA	NA	NA	NA	enriched	enriched	enriched	enriched	NA	NA	8	0
TMEM177	NA	enriched	enriched	NA	NA	enriched	NA	NA	NA	enriched	NA	NA	enriched	NA	NA	NA	NA	NA	enriched	enriched	enriched	NA	8	0
TTC23	enriched	NA	enriched	NA	NA	NA	NA	NA	NA	NA	NA	enriched	enriched	enriched	NA	NA	NA	NA	NA	enriched	enriched	enriched	8	0
UBE4B	NA	NA	enriched	NA	NA	enriched	enriched	NA	NA	NA	NA	enriched	enriched	enriched	NA	NA	NA	enriched	enriched	NA	NA	NA	8	0
WWOX	enriched	NA	enriched	enriched	NA	NA	enriched	enriched	NA	NA	NA	NA	enriched	NA	enriched	NA	NA	enriched	NA	NA	NA	NA	8	0
ZCCHC4	enriched	enriched	enriched	NA	enriched	NA	NA	enriched	NA	NA	NA	enriched	enriched	NA	enriched	NA	NA	NA	NA	NA	NA	NA	8	0
ZNF813	enriched	NA	enriched	NA	enriched	NA	enriched	NA	enriched	NA	NA	NA	NA	NA	NA	NA	enriched	enriched	enriched	NA	NA	NA	8	0
ABHD5	NA	enriched	enriched	enriched	NA	NA	enriched	NA	NA	NA	NA	enriched	enriched	enriched	depleted	NA	NA	NA	enriched	NA	NA	NA	8	1
ADARB1	NA	NA	enriched	enriched	enriched	enriched	NA	enriched	NA	NA	NA	NA	NA	NA	enriched	NA	enriched	NA	enriched	NA	depleted	NA	8	1
ADGRL2	enriched	NA	enriched	NA	NA	NA	depleted	enriched	NA	NA	NA	enriched	enriched	enriched	enriched	enriched	NA	NA	NA	NA	NA	NA	8	1
ALG9	NA	enriched	enriched	NA	NA	enriched	NA	enriched	NA	enriched	NA	NA	NA	NA	depleted	NA	enriched	NA	enriched	NA	enriched	NA	8	1
ARSB	enriched	NA	enriched	NA	NA	enriched	NA	NA	NA	enriched	NA	enriched	enriched	NA	NA	NA	NA	depleted	NA	enriched	NA	enriched	8	1
BCAP29	NA	enriched	enriched	NA	NA	NA	NA	NA	depleted	NA	NA	enriched	enriched	enriched	NA	enriched	NA	enriched	NA	NA	NA	enriched	8	1
CASS4	enriched	NA	NA	enriched	NA	depleted	NA	enriched	NA	NA	NA	NA	NA	enriched	enriched	enriched	enriched	NA	NA	NA	NA	enriched	8	1
CDK19	enriched	NA	depleted	NA	enriched	enriched	enriched	NA	NA	NA	NA	enriched	enriched	enriched	NA	NA	enriched	NA	NA	NA	NA	NA	8	1
CLYBL	NA	enriched	enriched	NA	enriched	enriched	NA	enriched	NA	NA	NA	NA	NA	enriched	NA	NA	NA	enriched	NA	NA	depleted	enriched	8	1
CORO7-PAM16	NA	NA	enriched	NA	NA	NA	NA	enriched	enriched	enriched	NA	NA	NA	depleted	enriched	enriched	NA	enriched	NA	NA	NA	enriched	8	1
DNAJC12	NA	NA	NA	enriched	enriched	NA	NA	NA	enriched	enriched	enriched	NA	NA	NA	depleted	NA	NA	enriched	enriched	NA	NA	enriched	8	1
ERLIN2	NA	NA	NA	enriched	enriched	enriched	NA	enriched	NA	NA	NA	NA	depleted	enriched	NA	NA	enriched	NA	NA	enriched	enriched	NA	8	1
FBXO11	enriched	NA	enriched	NA	NA	NA	enriched	NA	NA	enriched	NA	NA	enriched	depleted	enriched	NA	NA	NA	NA	enriched	NA	enriched	8	1
FNTA	NA	enriched	NA	NA	NA	NA	enriched	enriched	enriched	enriched	NA	enriched	NA	enriched	NA	NA	NA	NA	enriched	depleted	NA	NA	8	1
HEATR1	enriched	NA	NA	enriched	enriched	enriched	enriched	NA	NA	NA	NA	enriched	enriched	NA	NA	NA	NA	enriched	NA	depleted	NA	NA	8	1
HIST1H2BD	enriched	NA	depleted	enriched	enriched	enriched	NA	NA	NA	NA	enriched	NA	NA	NA	enriched	NA	NA	enriched	enriched	NA	NA	NA	8	1
IQCG	enriched	enriched	enriched	NA	enriched	NA	NA	depleted	NA	NA	enriched	NA	NA	enriched	enriched	NA	NA	NA	NA	NA	NA	enriched	8	1
KCTD2	enriched	enriched	enriched	depleted	NA	NA	NA	enriched	NA	NA	NA	enriched	enriched	NA	NA	NA	NA	NA	NA	NA	enriched	enriched	8	1
NEK10	enriched	enriched	NA	NA	NA	NA	enriched	enriched	NA	NA	NA	enriched	enriched	NA	depleted	NA	enriched	NA	NA	enriched	NA	NA	8	1
NPHP3	NA	NA	NA	NA	NA	enriched	enriched	enriched	NA	NA	NA	enriched	enriched	enriched	depleted	enriched	NA	NA	enriched	NA	NA	NA	8	1
PCNX4	enriched	NA	enriched	enriched	NA	enriched	NA	depleted	NA	NA	NA	NA	enriched	NA	enriched	NA	enriched	NA	enriched	NA	NA	NA	8	1
PDCD11	enriched	NA	NA	NA	NA	NA	NA	enriched	depleted	NA	NA	enriched	enriched	NA	NA	enriched	NA	NA	enriched	NA	enriched	enriched	8	1
PDCD2	enriched	NA	NA	enriched	NA	enriched	NA	NA	NA	enriched	enriched	enriched	NA	NA	NA	NA	NA	depleted	enriched	NA	NA	enriched	8	1
PFKFB2	NA	NA	enriched	enriched	NA	NA	NA	enriched	NA	enriched	enriched	enriched	enriched	enriched	depleted	NA	NA	NA	NA	NA	NA	NA	8	1
PLB1	NA	enriched	enriched	NA	NA	NA	enriched	NA	NA	NA	NA	NA	enriched	depleted	NA	enriched	enriched	NA	enriched	NA	NA	enriched	8	1
PLPP5	NA	enriched	enriched	enriched	NA	enriched	NA	NA	NA	enriched	enriched	enriched	NA	NA	NA	NA	NA	depleted	NA	NA	NA	enriched	8	1
RASGRF1	NA	NA	enriched	NA	NA	NA	NA	NA	enriched	NA	NA	enriched	enriched	NA	NA	enriched	NA	enriched	NA	depleted	enriched	enriched	8	1
SLC30A9	enriched	enriched	enriched	NA	NA	NA	NA	enriched	NA	NA	NA	enriched	enriched	NA	depleted	enriched	NA	NA	NA	NA	NA	enriched	8	1
SLC9B2	NA	NA	enriched	enriched	enriched	NA	NA	NA	NA	enriched	enriched	NA	NA	NA	enriched	NA	enriched	enriched	NA	depleted	NA	NA	8	1
SPATA17	NA	NA	NA	NA	enriched	depleted	NA	NA	enriched	enriched	NA	enriched	enriched	NA	NA	enriched	enriched	NA	NA	NA	NA	enriched	8	1
SUSD4	depleted	enriched	NA	NA	NA	NA	NA	enriched	NA	enriched	NA	enriched	NA	enriched	enriched	NA	NA	NA	NA	enriched	enriched	NA	8	1
SWT1	enriched	NA	enriched	NA	NA	NA	enriched	enriched	NA	enriched	enriched	NA	enriched	NA	depleted	NA	NA	enriched	NA	NA	NA	NA	8	1
TBCK	enriched	NA	NA	enriched	NA	enriched	NA	enriched	enriched	NA	enriched	NA	enriched	depleted	NA	NA	NA	enriched	NA	NA	NA	NA	8	1
TF	NA	NA	enriched	NA	enriched	NA	NA	enriched	NA	enriched	NA	NA	NA	enriched	depleted	NA	NA	NA	enriched	enriched	enriched	NA	8	1
TIGD6	NA	NA	enriched	enriched	enriched	NA	NA	NA	NA	NA	NA	enriched	NA	NA	enriched	enriched	enriched	NA	depleted	NA	NA	enriched	8	1
TMEM189-UBE2V1	enriched	NA	enriched	NA	NA	enriched	enriched	NA	NA	NA	NA	NA	enriched	enriched	depleted	NA	NA	enriched	NA	NA	NA	enriched	8	1
TMEM91	enriched	enriched	NA	NA	NA	NA	NA	enriched	NA	enriched	NA	NA	enriched	NA	enriched	enriched	NA	enriched	NA	depleted	NA	NA	8	1
U2SURP	enriched	NA	enriched	NA	enriched	depleted	enriched	NA	NA	NA	NA	enriched	enriched	NA	enriched	NA	NA	enriched	NA	NA	NA	NA	8	1
UQCC1	enriched	NA	depleted	enriched	NA	NA	enriched	enriched	NA	NA	enriched	enriched	enriched	NA	enriched	NA	NA	NA	NA	NA	NA	NA	8	1
VPS37A	NA	enriched	enriched	NA	NA	enriched	enriched	NA	enriched	enriched	NA	enriched	NA	NA	depleted	NA	NA	NA	NA	NA	NA	enriched	8	1
ZNF280D	enriched	enriched	enriched	NA	NA	enriched	NA	NA	depleted	NA	NA	enriched	enriched	enriched	NA	NA	NA	NA	NA	NA	NA	enriched	8	1
AK7	enriched	enriched	NA	enriched	enriched	enriched	NA	enriched	NA	depleted	NA	enriched	enriched	depleted	NA	NA	NA	NA	NA	NA	NA	NA	8	2
ALG2	enriched	NA	enriched	NA	NA	depleted	enriched	NA	NA	NA	NA	enriched	enriched	enriched	depleted	NA	enriched	NA	NA	NA	NA	enriched	8	2
ATP9B	NA	NA	NA	enriched	enriched	NA	enriched	depleted	NA	NA	NA	enriched	enriched	enriched	depleted	NA	enriched	enriched	NA	NA	NA	NA	8	2
BCAS3	depleted	NA	NA	enriched	enriched	depleted	NA	NA	enriched	enriched	NA	enriched	enriched	NA	NA	enriched	enriched	NA	NA	NA	NA	NA	8	2
BEND6	enriched	NA	enriched	NA	NA	NA	NA	enriched	enriched	enriched	NA	NA	NA	depleted	depleted	enriched	NA	enriched	NA	NA	NA	enriched	8	2
C12orf66	NA	enriched	enriched	enriched	NA	NA	NA	NA	depleted	NA	NA	enriched	enriched	NA	enriched	NA	NA	enriched	NA	depleted	NA	enriched	8	2
CDKL3	enriched	NA	NA	enriched	NA	enriched	NA	enriched	depleted	NA	NA	NA	NA	NA	depleted	enriched	NA	enriched	NA	NA	enriched	enriched	8	2
CECR2	enriched	NA	NA	enriched	NA	NA	NA	NA	enriched	NA	depleted	NA	enriched	enriched	depleted	NA	NA	enriched	NA	enriched	enriched	NA	8	2
COX11	NA	enriched	enriched	depleted	NA	NA	NA	NA	NA	NA	depleted	enriched	NA	enriched	enriched	enriched	NA	NA	NA	NA	enriched	enriched	8	2
CSMD1	enriched	enriched	enriched	NA	enriched	NA	NA	enriched	NA	NA	depleted	enriched	enriched	NA	depleted	NA	NA	NA	NA	NA	NA	enriched	8	2
CSNK2A2	NA	NA	enriched	NA	NA	NA	enriched	enriched	NA	NA	NA	enriched	enriched	NA	depleted	NA	NA	enriched	NA	depleted	enriched	enriched	8	2
CUL9	enriched	NA	NA	NA	enriched	enriched	NA	NA	depleted	enriched	NA	enriched	enriched	enriched	NA	NA	NA	enriched	NA	depleted	NA	NA	8	2
DEAF1	NA	NA	NA	enriched	NA	NA	enriched	NA	depleted	NA	NA	enriched	enriched	enriched	NA	depleted	enriched	NA	NA	enriched	NA	enriched	8	2
DHRS7	NA	NA	enriched	NA	enriched	enriched	NA	NA	NA	enriched	NA	enriched	enriched	depleted	NA	NA	NA	depleted	NA	NA	enriched	enriched	8	2
DLGAP1	NA	enriched	enriched	NA	enriched	enriched	NA	NA	enriched	NA	NA	NA	NA	NA	depleted	NA	enriched	depleted	NA	enriched	enriched	NA	8	2
DPP9	enriched	enriched	enriched	enriched	enriched	NA	NA	NA	NA	depleted	NA	NA	NA	depleted	NA	NA	enriched	enriched	NA	NA	NA	enriched	8	2
DYNC2LI1	NA	NA	enriched	enriched	NA	NA	depleted	enriched	NA	enriched	enriched	NA	NA	enriched	NA	NA	NA	depleted	NA	enriched	enriched	NA	8	2
ELK4	NA	NA	enriched	NA	enriched	NA	enriched	NA	NA	enriched	NA	NA	enriched	depleted	depleted	NA	enriched	NA	enriched	NA	NA	enriched	8	2
FPGT-TNNI3K	enriched	NA	enriched	depleted	NA	NA	NA	enriched	NA	enriched	NA	enriched	NA	NA	enriched	enriched	NA	NA	enriched	NA	depleted	NA	8	2
GPALPP1	NA	enriched	enriched	depleted	NA	enriched	NA	NA	depleted	NA	NA	enriched	enriched	NA	NA	NA	NA	NA	enriched	NA	enriched	enriched	8	2
HELQ	NA	enriched	NA	enriched	NA	NA	NA	enriched	NA	enriched	NA	enriched	enriched	enriched	depleted	enriched	NA	NA	depleted	NA	NA	NA	8	2
HEXB	enriched	NA	depleted	enriched	NA	NA	enriched	enriched	NA	enriched	NA	NA	NA	enriched	enriched	NA	NA	enriched	NA	depleted	NA	NA	8	2
HS3ST3B1	enriched	NA	depleted	NA	enriched	NA	enriched	NA	NA	enriched	NA	enriched	enriched	NA	depleted	NA	enriched	NA	NA	NA	NA	enriched	8	2
IDS	enriched	enriched	enriched	depleted	enriched	NA	NA	enriched	NA	NA	NA	NA	NA	depleted	NA	NA	enriched	NA	NA	enriched	NA	enriched	8	2
MPP3	enriched	enriched	enriched	NA	depleted	NA	NA	enriched	NA	NA	NA	NA	enriched	enriched	depleted	NA	NA	NA	enriched	NA	NA	enriched	8	2
NLRC5	enriched	enriched	enriched	NA	NA	enriched	NA	NA	NA	depleted	NA	enriched	enriched	NA	enriched	NA	NA	NA	NA	depleted	enriched	NA	8	2
NOL4L	enriched	NA	NA	enriched	enriched	NA	NA	NA	depleted	NA	NA	enriched	enriched	enriched	depleted	NA	NA	NA	NA	NA	enriched	enriched	8	2
PDE9A	enriched	enriched	NA	NA	NA	NA	NA	NA	depleted	depleted	NA	enriched	NA	enriched	NA	NA	enriched	NA	enriched	NA	enriched	enriched	8	2
PPP5D1	NA	NA	enriched	NA	enriched	NA	NA	NA	NA	NA	NA	enriched	enriched	NA	depleted	depleted	enriched	enriched	enriched	enriched	NA	NA	8	2
PRTFDC1	enriched	NA	enriched	NA	NA	NA	NA	enriched	enriched	enriched	enriched	enriched	NA	NA	depleted	NA	NA	depleted	NA	enriched	NA	NA	8	2
RBM4B	NA	enriched	NA	NA	enriched	NA	enriched	NA	depleted	NA	NA	enriched	enriched	NA	depleted	NA	NA	enriched	enriched	NA	NA	enriched	8	2
RUVBL1	enriched	enriched	NA	NA	enriched	NA	NA	NA	NA	NA	NA	NA	enriched	enriched	depleted	NA	enriched	depleted	NA	enriched	enriched	NA	8	2
SDCCAG8	enriched	enriched	enriched	NA	NA	NA	depleted	NA	NA	NA	NA	NA	NA	enriched	depleted	NA	enriched	enriched	NA	NA	enriched	enriched	8	2
SEMA4D	enriched	NA	enriched	enriched	enriched	NA	NA	NA	enriched	NA	NA	enriched	NA	NA	depleted	enriched	NA	depleted	enriched	NA	NA	NA	8	2
SLC35B3	enriched	NA	enriched	enriched	enriched	NA	NA	NA	depleted	NA	enriched	NA	NA	NA	enriched	enriched	NA	enriched	NA	NA	depleted	NA	8	2
SRR	enriched	NA	depleted	enriched	enriched	NA	NA	enriched	NA	NA	enriched	NA	NA	enriched	depleted	NA	enriched	enriched	NA	NA	NA	NA	8	2
SVIP	enriched	enriched	enriched	enriched	NA	NA	NA	depleted	enriched	NA	NA	enriched	enriched	NA	NA	NA	NA	depleted	NA	NA	NA	enriched	8	2
TPGS2	NA	enriched	NA	depleted	NA	NA	NA	NA	enriched	enriched	enriched	NA	NA	depleted	NA	enriched	NA	enriched	NA	NA	enriched	enriched	8	2
TPM1	NA	NA	enriched	depleted	enriched	NA	depleted	enriched	NA	NA	NA	NA	NA	enriched	NA	enriched	enriched	enriched	NA	NA	NA	enriched	8	2
TSHZ3	enriched	enriched	NA	NA	enriched	NA	NA	depleted	NA	NA	NA	NA	enriched	NA	depleted	NA	enriched	enriched	enriched	NA	NA	enriched	8	2
TTC12	NA	enriched	enriched	NA	enriched	enriched	NA	NA	NA	depleted	NA	enriched	enriched	NA	depleted	NA	NA	NA	NA	NA	enriched	enriched	8	2
UIMC1	enriched	NA	enriched	depleted	enriched	NA	enriched	NA	NA	NA	NA	NA	enriched	enriched	depleted	NA	NA	enriched	NA	NA	NA	enriched	8	2
VAMP4	enriched	enriched	enriched	depleted	NA	NA	NA	NA	enriched	NA	NA	enriched	enriched	NA	depleted	enriched	NA	NA	NA	NA	NA	enriched	8	2
ZKSCAN1	NA	enriched	enriched	NA	enriched	NA	enriched	depleted	NA	NA	NA	NA	enriched	enriched	depleted	NA	NA	NA	enriched	NA	NA	enriched	8	2
ZNF169	enriched	NA	depleted	NA	enriched	NA	NA	NA	depleted	NA	NA	NA	enriched	NA	enriched	enriched	enriched	NA	NA	enriched	NA	enriched	8	2
ANGEL2	enriched	NA	enriched	NA	enriched	depleted	enriched	enriched	NA	enriched	NA	NA	NA	NA	depleted	NA	NA	depleted	NA	NA	enriched	enriched	8	3
ATXN1	enriched	NA	enriched	depleted	enriched	enriched	NA	depleted	NA	NA	NA	NA	NA	NA	depleted	NA	enriched	enriched	NA	NA	enriched	enriched	8	3
CASZ1	NA	NA	NA	NA	NA	NA	NA	enriched	enriched	enriched	enriched	enriched	enriched	depleted	depleted	NA	NA	depleted	NA	enriched	enriched	NA	8	3
CRADD	NA	NA	enriched	depleted	NA	depleted	NA	enriched	enriched	enriched	NA	NA	enriched	enriched	NA	NA	depleted	NA	NA	enriched	enriched	NA	8	3
DPY19L4	enriched	NA	depleted	enriched	NA	enriched	enriched	NA	NA	NA	NA	NA	enriched	depleted	enriched	NA	NA	enriched	NA	depleted	enriched	NA	8	3
FLAD1	enriched	NA	NA	enriched	enriched	NA	NA	NA	depleted	NA	enriched	NA	enriched	NA	depleted	enriched	NA	depleted	NA	NA	enriched	enriched	8	3
GNAO1	NA	NA	NA	enriched	enriched	enriched	enriched	NA	NA	enriched	enriched	NA	NA	depleted	depleted	NA	NA	enriched	enriched	NA	NA	depleted	8	3
HOXC4	enriched	depleted	depleted	NA	enriched	NA	NA	NA	enriched	enriched	NA	NA	enriched	NA	depleted	NA	NA	enriched	NA	NA	enriched	enriched	8	3
KIF13A	enriched	NA	enriched	depleted	NA	NA	NA	NA	depleted	NA	NA	enriched	enriched	enriched	enriched	NA	NA	enriched	NA	depleted	NA	enriched	8	3
LY75	enriched	enriched	enriched	NA	NA	NA	enriched	depleted	depleted	NA	NA	NA	enriched	enriched	enriched	NA	depleted	NA	NA	NA	NA	enriched	8	3
MED14	NA	enriched	NA	depleted	enriched	NA	NA	enriched	NA	enriched	enriched	enriched	enriched	NA	depleted	NA	enriched	depleted	NA	NA	NA	NA	8	3
NSUN6	enriched	NA	enriched	enriched	NA	NA	NA	depleted	depleted	NA	enriched	NA	NA	NA	depleted	enriched	enriched	NA	enriched	NA	NA	enriched	8	3
NUP85	enriched	enriched	enriched	depleted	NA	enriched	enriched	depleted	NA	NA	depleted	enriched	enriched	NA	NA	NA	NA	NA	enriched	NA	NA	NA	8	3
PTGR1	NA	enriched	enriched	depleted	NA	NA	NA	NA	NA	NA	NA	enriched	enriched	enriched	depleted	enriched	enriched	depleted	NA	NA	NA	enriched	8	3
RNF103-CHMP3	NA	enriched	depleted	depleted	NA	NA	NA	NA	NA	NA	depleted	enriched	enriched	NA	NA	enriched	enriched	enriched	NA	NA	enriched	enriched	8	3
SBF2	enriched	NA	enriched	NA	NA	depleted	enriched	NA	depleted	NA	NA	NA	enriched	enriched	enriched	NA	depleted	enriched	NA	NA	NA	enriched	8	3
THAP2	NA	NA	NA	enriched	enriched	enriched	NA	enriched	NA	NA	NA	NA	NA	depleted	depleted	enriched	enriched	depleted	NA	enriched	NA	enriched	8	3
ZNF318	NA	enriched	enriched	depleted	NA	enriched	enriched	NA	NA	NA	NA	enriched	enriched	enriched	depleted	NA	NA	depleted	NA	NA	NA	enriched	8	3
ATXN2	NA	NA	enriched	enriched	enriched	depleted	NA	NA	depleted	NA	NA	enriched	enriched	enriched	depleted	NA	NA	depleted	NA	NA	enriched	enriched	8	4
BRAF	NA	enriched	enriched	depleted	NA	enriched	NA	NA	depleted	NA	NA	enriched	enriched	enriched	depleted	NA	NA	depleted	NA	enriched	NA	enriched	8	4
CNOT7	enriched	NA	enriched	NA	enriched	enriched	enriched	depleted	depleted	NA	NA	enriched	enriched	depleted	NA	NA	NA	depleted	NA	NA	NA	enriched	8	4
CREB1	enriched	enriched	enriched	NA	NA	enriched	enriched	NA	depleted	NA	NA	enriched	enriched	NA	depleted	NA	NA	depleted	NA	NA	depleted	enriched	8	4
FAAP20	NA	NA	depleted	NA	enriched	NA	enriched	NA	enriched	NA	NA	enriched	enriched	depleted	enriched	enriched	enriched	depleted	NA	NA	depleted	NA	8	4
FARP1	enriched	enriched	NA	NA	enriched	depleted	NA	NA	NA	depleted	NA	enriched	NA	NA	depleted	enriched	enriched	NA	NA	enriched	depleted	enriched	8	4
KCTD1	enriched	enriched	NA	NA	enriched	enriched	NA	depleted	NA	NA	NA	NA	depleted	depleted	depleted	enriched	enriched	NA	enriched	NA	NA	enriched	8	4
KDM4C	enriched	NA	depleted	NA	NA	enriched	NA	NA	depleted	NA	NA	enriched	NA	enriched	enriched	NA	NA	enriched	enriched	depleted	depleted	enriched	8	4
KDM5C	enriched	enriched	enriched	depleted	enriched	enriched	NA	NA	depleted	NA	NA	NA	NA	NA	depleted	enriched	NA	NA	enriched	depleted	enriched	NA	8	4
KIAA0141	enriched	enriched	enriched	NA	NA	NA	NA	enriched	depleted	enriched	depleted	enriched	enriched	NA	NA	NA	NA	depleted	NA	depleted	enriched	NA	8	4
RAD51C	enriched	NA	depleted	NA	NA	NA	enriched	enriched	depleted	NA	NA	NA	NA	enriched	depleted	enriched	depleted	NA	NA	enriched	enriched	enriched	8	4
RRAGB	NA	NA	enriched	depleted	NA	NA	NA	NA	enriched	enriched	NA	NA	NA	enriched	depleted	enriched	enriched	depleted	enriched	NA	depleted	enriched	8	4
SETDB1	NA	depleted	depleted	enriched	NA	NA	depleted	enriched	NA	NA	NA	enriched	enriched	depleted	enriched	NA	NA	enriched	NA	NA	enriched	enriched	8	4
TGFBRAP1	depleted	NA	depleted	enriched	enriched	NA	enriched	NA	enriched	enriched	NA	NA	enriched	enriched	depleted	depleted	enriched	NA	NA	NA	NA	NA	8	4
VSIG10	enriched	enriched	enriched	NA	NA	NA	NA	depleted	depleted	NA	NA	NA	enriched	enriched	depleted	NA	depleted	NA	enriched	NA	enriched	enriched	8	4
ASXL1	enriched	enriched	enriched	depleted	NA	enriched	NA	depleted	NA	depleted	NA	NA	enriched	NA	depleted	NA	NA	enriched	enriched	depleted	NA	enriched	8	5
FAM47E-STBD1	enriched	NA	NA	enriched	enriched	NA	NA	depleted	depleted	depleted	NA	NA	depleted	NA	enriched	enriched	enriched	NA	enriched	depleted	enriched	NA	8	5
GDAP2	enriched	enriched	enriched	depleted	NA	enriched	NA	NA	depleted	NA	NA	NA	enriched	enriched	depleted	NA	depleted	depleted	NA	NA	enriched	enriched	8	5
KIAA1217	NA	enriched	enriched	depleted	depleted	NA	depleted	enriched	NA	NA	NA	enriched	enriched	enriched	depleted	enriched	depleted	NA	NA	NA	NA	enriched	8	5
NBPF1	enriched	enriched	NA	enriched	depleted	enriched	enriched	NA	depleted	NA	NA	enriched	enriched	NA	depleted	NA	depleted	depleted	NA	NA	NA	enriched	8	5
PCDH1	NA	NA	enriched	depleted	enriched	enriched	NA	depleted	enriched	enriched	depleted	enriched	enriched	enriched	depleted	NA	NA	depleted	NA	NA	NA	NA	8	5
RYR2	enriched	NA	enriched	depleted	NA	NA	depleted	NA	depleted	depleted	NA	enriched	enriched	NA	depleted	NA	NA	enriched	NA	enriched	enriched	enriched	8	5
SCRN3	enriched	NA	enriched	depleted	depleted	enriched	NA	NA	depleted	depleted	NA	enriched	NA	depleted	enriched	enriched	NA	enriched	NA	NA	NA	enriched	8	5
SYNGR1	NA	NA	enriched	depleted	enriched	enriched	NA	depleted	enriched	NA	NA	enriched	NA	depleted	depleted	NA	enriched	depleted	NA	NA	enriched	enriched	8	5
ANKS6	enriched	enriched	enriched	depleted	NA	enriched	enriched	NA	NA	NA	depleted	NA	NA	enriched	depleted	NA	depleted	depleted	NA	depleted	enriched	enriched	8	6
DCLK1	enriched	NA	enriched	NA	NA	enriched	enriched	depleted	depleted	depleted	NA	depleted	depleted	enriched	depleted	depleted	enriched	enriched	enriched	depleted	NA	NA	8	8
KIF16B	enriched	enriched	depleted	depleted	depleted	NA	enriched	enriched	depleted	depleted	NA	enriched	enriched	enriched	NA	NA	depleted	depleted	NA	depleted	NA	enriched	8	8
AK6	NA	NA	enriched	NA	enriched	NA	enriched	NA	NA	enriched	NA	NA	NA	NA	enriched	NA	NA	enriched	NA	NA	NA	enriched	7	0
BEAN1	NA	enriched	NA	enriched	NA	NA	NA	NA	NA	enriched	NA	enriched	NA	enriched	NA	NA	enriched	NA	NA	enriched	NA	NA	7	0
BICRAL	enriched	NA	enriched	enriched	enriched	NA	NA	enriched	NA	NA	NA	NA	NA	NA	enriched	NA	NA	enriched	NA	NA	NA	NA	7	0
C6orf203	enriched	NA	enriched	enriched	enriched	NA	enriched	NA	NA	NA	NA	enriched	NA	NA	NA	NA	NA	NA	NA	NA	NA	enriched	7	0
CDK4	NA	NA	NA	enriched	enriched	enriched	NA	NA	NA	NA	NA	enriched	enriched	NA	NA	NA	enriched	enriched	NA	NA	NA	NA	7	0
CFAP221	NA	NA	NA	NA	NA	NA	NA	enriched	NA	NA	NA	enriched	enriched	enriched	NA	NA	NA	NA	enriched	enriched	NA	enriched	7	0
CHRM2	NA	NA	NA	enriched	enriched	NA	NA	NA	NA	NA	enriched	NA	enriched	NA	NA	NA	enriched	NA	NA	NA	enriched	enriched	7	0
DNAJC21	NA	NA	NA	NA	enriched	enriched	enriched	enriched	NA	NA	NA	NA	enriched	NA	NA	NA	enriched	NA	enriched	NA	NA	NA	7	0
EIF2AK2	enriched	enriched	enriched	NA	NA	NA	NA	NA	NA	NA	NA	enriched	enriched	NA	enriched	NA	NA	enriched	NA	NA	NA	NA	7	0
EIF4G3	NA	NA	NA	NA	enriched	NA	enriched	NA	NA	NA	NA	NA	enriched	NA	NA	enriched	enriched	NA	enriched	NA	NA	enriched	7	0
EPS15L1	enriched	NA	NA	NA	NA	NA	enriched	NA	NA	NA	NA	NA	enriched	enriched	NA	NA	enriched	enriched	NA	enriched	NA	NA	7	0
GLDN	enriched	enriched	NA	NA	NA	NA	NA	NA	NA	NA	NA	enriched	enriched	NA	enriched	NA	enriched	enriched	NA	NA	NA	NA	7	0
HP1BP3	enriched	NA	enriched	NA	enriched	NA	NA	NA	NA	NA	NA	enriched	enriched	enriched	NA	NA	enriched	NA	NA	NA	NA	NA	7	0
LRRC6	enriched	enriched	NA	NA	NA	NA	enriched	enriched	NA	NA	NA	enriched	enriched	NA	NA	NA	NA	NA	enriched	NA	NA	NA	7	0
MDH1B	NA	enriched	enriched	NA	NA	enriched	NA	enriched	enriched	NA	NA	NA	enriched	NA	NA	NA	NA	NA	NA	enriched	NA	NA	7	0
ME1	NA	NA	NA	NA	NA	NA	NA	enriched	enriched	NA	enriched	NA	NA	enriched	NA	NA	enriched	NA	NA	enriched	NA	enriched	7	0
METTL6	NA	NA	enriched	NA	enriched	NA	NA	enriched	NA	enriched	enriched	NA	NA	enriched	NA	NA	NA	NA	NA	enriched	NA	NA	7	0
NT5DC1	NA	NA	enriched	NA	NA	NA	NA	NA	NA	NA	NA	enriched	enriched	enriched	enriched	NA	NA	enriched	NA	NA	NA	enriched	7	0
NTNG1	enriched	NA	enriched	NA	NA	NA	NA	enriched	NA	enriched	NA	enriched	enriched	NA	NA	enriched	NA	NA	NA	NA	NA	NA	7	0
OLFML1	NA	NA	enriched	enriched	NA	NA	NA	enriched	NA	enriched	enriched	NA	NA	enriched	NA	NA	NA	NA	NA	NA	enriched	NA	7	0
PDE7A	enriched	NA	enriched	enriched	NA	NA	NA	enriched	enriched	NA	NA	NA	NA	NA	enriched	NA	NA	enriched	NA	NA	NA	NA	7	0
PPP1R7	enriched	enriched	enriched	NA	enriched	NA	NA	enriched	NA	NA	NA	NA	NA	NA	NA	NA	NA	NA	enriched	NA	NA	enriched	7	0
RAD50	enriched	NA	NA	NA	enriched	NA	NA	NA	NA	NA	NA	enriched	enriched	NA	NA	NA	enriched	NA	enriched	NA	NA	enriched	7	0
SLCO3A1	NA	enriched	enriched	NA	enriched	enriched	NA	NA	enriched	enriched	NA	enriched	NA	NA	NA	NA	NA	NA	NA	NA	NA	NA	7	0
SNX5	enriched	NA	enriched	NA	enriched	enriched	enriched	NA	NA	NA	NA	NA	enriched	NA	NA	NA	NA	NA	enriched	NA	NA	NA	7	0
TBC1D31	NA	enriched	NA	enriched	NA	NA	enriched	enriched	NA	NA	NA	NA	enriched	enriched	enriched	NA	NA	NA	NA	NA	NA	NA	7	0
TRABD2A	NA	NA	NA	NA	enriched	NA	NA	NA	NA	enriched	NA	enriched	enriched	enriched	NA	NA	enriched	enriched	NA	NA	NA	NA	7	0
TTC7A	NA	NA	enriched	NA	enriched	NA	NA	NA	NA	NA	NA	enriched	enriched	NA	NA	enriched	enriched	enriched	NA	NA	NA	NA	7	0
ZNF331	enriched	NA	enriched	enriched	NA	NA	NA	NA	NA	NA	NA	enriched	NA	enriched	enriched	NA	NA	NA	NA	NA	NA	enriched	7	0
AIG1	NA	NA	NA	enriched	NA	enriched	enriched	NA	NA	NA	NA	NA	NA	enriched	depleted	enriched	NA	enriched	NA	NA	enriched	NA	7	1
ALG10B	NA	enriched	enriched	NA	NA	NA	enriched	NA	NA	NA	NA	enriched	enriched	enriched	NA	NA	NA	NA	depleted	NA	NA	enriched	7	1
ARSE	NA	NA	NA	enriched	enriched	NA	NA	enriched	NA	NA	enriched	enriched	enriched	depleted	NA	NA	enriched	NA	NA	NA	NA	NA	7	1
ATG7	NA	NA	enriched	NA	NA	enriched	NA	NA	NA	NA	NA	NA	NA	enriched	NA	NA	NA	depleted	enriched	enriched	enriched	enriched	7	1
AUH	NA	NA	NA	enriched	enriched	NA	enriched	NA	enriched	NA	depleted	enriched	enriched	NA	NA	NA	enriched	NA	NA	NA	NA	NA	7	1
C1RL	NA	NA	enriched	enriched	enriched	NA	NA	enriched	NA	NA	enriched	NA	NA	enriched	NA	NA	NA	depleted	NA	enriched	NA	NA	7	1
C6orf52	NA	NA	NA	NA	enriched	depleted	NA	enriched	NA	enriched	NA	NA	NA	NA	enriched	enriched	enriched	NA	NA	enriched	NA	NA	7	1
C9orf3	NA	NA	NA	enriched	NA	NA	enriched	NA	NA	NA	enriched	enriched	NA	depleted	enriched	NA	NA	NA	enriched	NA	enriched	NA	7	1
CNDP2	enriched	NA	enriched	NA	enriched	NA	enriched	NA	NA	NA	enriched	NA	enriched	NA	enriched	NA	NA	NA	NA	NA	NA	depleted	7	1
CRELD1	enriched	NA	enriched	NA	NA	NA	NA	enriched	NA	enriched	NA	NA	enriched	NA	NA	NA	enriched	NA	enriched	NA	depleted	NA	7	1
DDX60L	NA	enriched	enriched	enriched	enriched	NA	NA	NA	depleted	NA	NA	enriched	enriched	NA	NA	NA	NA	NA	NA	NA	NA	enriched	7	1
DOCK9	NA	enriched	enriched	enriched	NA	NA	NA	NA	NA	enriched	NA	enriched	enriched	NA	NA	NA	NA	depleted	NA	NA	NA	enriched	7	1
GOSR2	NA	enriched	depleted	NA	enriched	NA	NA	NA	NA	NA	NA	NA	enriched	NA	NA	NA	enriched	enriched	NA	NA	enriched	enriched	7	1
IFT74	NA	enriched	enriched	NA	NA	NA	enriched	NA	NA	NA	NA	NA	enriched	enriched	NA	NA	depleted	enriched	NA	NA	NA	enriched	7	1
IGF2R	NA	NA	enriched	NA	depleted	NA	enriched	NA	NA	NA	NA	enriched	enriched	NA	enriched	NA	NA	enriched	NA	enriched	NA	NA	7	1
JPH2	enriched	NA	enriched	NA	NA	NA	enriched	enriched	depleted	NA	NA	NA	NA	enriched	NA	enriched	NA	NA	NA	NA	NA	enriched	7	1
MAN2C1	NA	NA	enriched	enriched	enriched	NA	NA	enriched	NA	NA	NA	NA	NA	NA	enriched	NA	enriched	enriched	NA	NA	depleted	NA	7	1
MUM1	enriched	NA	depleted	NA	NA	NA	enriched	enriched	NA	NA	NA	enriched	enriched	enriched	NA	NA	NA	NA	enriched	NA	NA	NA	7	1
MYOM1	NA	NA	NA	NA	NA	enriched	NA	enriched	NA	NA	NA	NA	enriched	enriched	depleted	NA	NA	enriched	enriched	enriched	NA	NA	7	1
OCIAD1	enriched	NA	NA	enriched	enriched	depleted	NA	NA	NA	enriched	NA	NA	NA	enriched	enriched	NA	NA	enriched	NA	NA	NA	NA	7	1
PDCD4	NA	NA	NA	enriched	enriched	NA	enriched	NA	enriched	enriched	NA	NA	NA	NA	enriched	NA	depleted	enriched	NA	NA	NA	NA	7	1
PRRC1	enriched	enriched	enriched	NA	NA	NA	NA	NA	NA	NA	enriched	enriched	NA	NA	NA	NA	NA	enriched	NA	depleted	NA	enriched	7	1
PTHLH	NA	NA	enriched	NA	NA	NA	enriched	NA	enriched	enriched	NA	NA	enriched	NA	depleted	NA	enriched	enriched	NA	NA	NA	NA	7	1
PTPN4	enriched	NA	NA	NA	NA	NA	enriched	NA	NA	NA	NA	enriched	enriched	enriched	NA	NA	depleted	enriched	NA	NA	NA	enriched	7	1
RAB3IP	NA	NA	enriched	depleted	NA	NA	NA	NA	NA	NA	NA	enriched	enriched	enriched	NA	NA	enriched	enriched	NA	enriched	NA	NA	7	1
RPS20	enriched	NA	enriched	NA	NA	enriched	NA	enriched	enriched	enriched	NA	NA	NA	NA	depleted	NA	NA	NA	NA	NA	NA	enriched	7	1
SCLT1	enriched	NA	NA	NA	enriched	NA	NA	NA	depleted	NA	NA	enriched	enriched	enriched	NA	NA	enriched	enriched	NA	NA	NA	NA	7	1
SLC16A14	NA	NA	enriched	NA	enriched	NA	NA	NA	NA	NA	NA	enriched	NA	enriched	depleted	NA	enriched	NA	enriched	NA	NA	enriched	7	1
SLC2A13	NA	NA	enriched	NA	enriched	NA	NA	NA	NA	NA	enriched	enriched	NA	NA	depleted	NA	enriched	NA	NA	NA	enriched	enriched	7	1
SREK1IP1	NA	enriched	enriched	NA	NA	NA	NA	NA	enriched	enriched	NA	NA	enriched	NA	depleted	NA	NA	NA	NA	enriched	NA	enriched	7	1
SRP19	NA	NA	enriched	NA	NA	enriched	NA	NA	NA	NA	NA	enriched	NA	NA	depleted	NA	enriched	NA	enriched	NA	enriched	enriched	7	1
TBC1D17	enriched	NA	enriched	enriched	enriched	NA	NA	NA	NA	NA	NA	NA	enriched	depleted	NA	NA	enriched	NA	enriched	NA	NA	NA	7	1
TCEA3	NA	NA	depleted	enriched	enriched	NA	enriched	enriched	NA	NA	enriched	NA	enriched	NA	NA	NA	NA	enriched	NA	NA	NA	NA	7	1
TFPI	enriched	NA	depleted	enriched	NA	NA	NA	NA	NA	NA	enriched	enriched	enriched	NA	NA	NA	NA	enriched	NA	NA	enriched	NA	7	1
TMPO	enriched	NA	NA	NA	NA	NA	enriched	NA	depleted	NA	NA	enriched	enriched	enriched	enriched	NA	NA	enriched	NA	NA	NA	NA	7	1
TRAF1	enriched	NA	enriched	NA	NA	NA	NA	enriched	NA	NA	NA	NA	enriched	enriched	depleted	enriched	NA	NA	NA	NA	NA	enriched	7	1
UROS	NA	NA	depleted	enriched	NA	enriched	enriched	NA	NA	NA	enriched	enriched	enriched	NA	enriched	NA	NA	NA	NA	NA	NA	NA	7	1
ZNF138	enriched	NA	enriched	NA	NA	enriched	NA	enriched	NA	NA	NA	enriched	enriched	NA	depleted	enriched	NA	NA	NA	NA	NA	NA	7	1
ZNF425	enriched	NA	NA	NA	enriched	enriched	NA	enriched	NA	enriched	NA	NA	NA	NA	depleted	NA	NA	NA	enriched	NA	NA	enriched	7	1
ZNF677	enriched	NA	depleted	enriched	NA	enriched	NA	NA	NA	enriched	NA	NA	NA	NA	enriched	NA	NA	enriched	NA	enriched	NA	NA	7	1
ZSCAN25	enriched	NA	NA	NA	NA	NA	enriched	enriched	NA	NA	NA	NA	enriched	depleted	enriched	NA	NA	enriched	NA	NA	enriched	NA	7	1
ANKRD36	NA	NA	enriched	NA	enriched	enriched	enriched	NA	depleted	NA	NA	enriched	enriched	NA	NA	NA	NA	enriched	NA	NA	depleted	NA	7	2
ARMC2	enriched	NA	enriched	NA	NA	NA	NA	enriched	NA	NA	NA	enriched	enriched	enriched	depleted	NA	depleted	NA	NA	NA	enriched	NA	7	2
ARMC8	enriched	NA	NA	NA	enriched	enriched	enriched	NA	depleted	NA	depleted	NA	enriched	NA	enriched	NA	enriched	NA	NA	NA	NA	NA	7	2
B9D1	enriched	NA	NA	NA	enriched	enriched	NA	depleted	NA	NA	NA	NA	NA	enriched	NA	enriched	enriched	NA	NA	depleted	enriched	NA	7	2
BTN2A1	NA	NA	enriched	NA	NA	NA	NA	enriched	NA	NA	NA	NA	NA	NA	enriched	enriched	enriched	enriched	NA	depleted	depleted	enriched	7	2
C5orf24	enriched	NA	enriched	NA	NA	NA	enriched	NA	NA	NA	NA	NA	enriched	NA	enriched	NA	NA	enriched	NA	depleted	depleted	enriched	7	2
CCSER1	enriched	NA	enriched	NA	depleted	NA	NA	NA	enriched	enriched	NA	NA	NA	NA	depleted	enriched	NA	NA	NA	enriched	NA	enriched	7	2
CHCHD3	NA	NA	enriched	NA	enriched	NA	enriched	depleted	depleted	NA	NA	NA	enriched	NA	NA	NA	enriched	enriched	NA	NA	NA	enriched	7	2
DFFA	enriched	enriched	enriched	NA	NA	NA	NA	NA	NA	NA	NA	NA	NA	depleted	enriched	NA	NA	depleted	NA	enriched	enriched	enriched	7	2
ERAP1	NA	NA	enriched	enriched	NA	NA	NA	NA	enriched	NA	NA	NA	NA	depleted	depleted	NA	enriched	NA	enriched	NA	enriched	enriched	7	2
FAM120B	enriched	NA	NA	NA	enriched	depleted	enriched	enriched	enriched	NA	NA	NA	NA	enriched	depleted	NA	enriched	NA	NA	NA	NA	NA	7	2
FBXL13	NA	NA	enriched	enriched	NA	NA	NA	NA	NA	NA	NA	NA	enriched	enriched	depleted	NA	enriched	enriched	NA	depleted	NA	enriched	7	2
FRY	NA	enriched	enriched	NA	NA	NA	NA	enriched	enriched	enriched	NA	NA	NA	NA	NA	NA	depleted	NA	depleted	enriched	NA	enriched	7	2
HECTD2	enriched	NA	NA	enriched	enriched	NA	NA	enriched	depleted	NA	NA	NA	NA	enriched	enriched	enriched	NA	depleted	NA	NA	NA	NA	7	2
ING5	enriched	enriched	enriched	NA	NA	NA	NA	enriched	enriched	enriched	NA	NA	NA	NA	depleted	NA	NA	depleted	NA	NA	enriched	NA	7	2
KIAA0232	enriched	NA	enriched	NA	NA	NA	NA	depleted	NA	NA	NA	enriched	enriched	enriched	enriched	NA	NA	enriched	NA	NA	depleted	NA	7	2
KIAA1958	NA	NA	enriched	NA	NA	enriched	NA	enriched	NA	enriched	NA	NA	NA	NA	enriched	NA	enriched	enriched	NA	depleted	NA	depleted	7	2
KLHL24	enriched	NA	enriched	NA	NA	NA	NA	NA	NA	depleted	enriched	NA	enriched	NA	enriched	NA	NA	enriched	NA	depleted	NA	enriched	7	2
KLHL36	enriched	enriched	NA	depleted	enriched	NA	NA	NA	NA	NA	depleted	enriched	enriched	NA	NA	NA	NA	enriched	NA	NA	NA	enriched	7	2
LHFPL3	NA	NA	NA	depleted	enriched	depleted	NA	enriched	enriched	enriched	NA	enriched	enriched	NA	NA	NA	NA	enriched	NA	NA	NA	NA	7	2
MLLT10	NA	enriched	enriched	NA	NA	NA	NA	NA	depleted	depleted	NA	NA	NA	enriched	NA	enriched	NA	enriched	NA	NA	enriched	enriched	7	2
MRS2	enriched	enriched	NA	enriched	NA	NA	NA	NA	NA	depleted	enriched	NA	NA	depleted	enriched	NA	NA	NA	enriched	NA	NA	enriched	7	2
NBPF3	NA	enriched	NA	NA	depleted	enriched	NA	enriched	NA	enriched	NA	enriched	enriched	NA	depleted	NA	NA	NA	NA	NA	NA	enriched	7	2
NISCH	enriched	enriched	enriched	depleted	NA	NA	enriched	enriched	enriched	NA	NA	NA	NA	NA	depleted	NA	NA	NA	enriched	NA	NA	NA	7	2
NSMCE2	enriched	enriched	enriched	NA	NA	enriched	NA	depleted	NA	NA	NA	enriched	NA	NA	enriched	NA	NA	depleted	NA	NA	enriched	NA	7	2
PCF11	NA	NA	NA	enriched	enriched	NA	NA	NA	depleted	depleted	NA	enriched	enriched	enriched	NA	NA	enriched	enriched	NA	NA	NA	NA	7	2
PCMT1	enriched	enriched	enriched	NA	NA	enriched	enriched	enriched	NA	NA	NA	NA	NA	NA	depleted	NA	depleted	NA	NA	NA	NA	enriched	7	2
PDE6A	NA	NA	depleted	NA	enriched	NA	enriched	NA	NA	NA	NA	enriched	enriched	NA	enriched	enriched	enriched	depleted	NA	NA	NA	NA	7	2
RPRD1A	enriched	NA	NA	NA	enriched	NA	NA	NA	depleted	NA	NA	enriched	enriched	depleted	enriched	NA	NA	enriched	enriched	NA	NA	NA	7	2
SAXO2	NA	NA	enriched	NA	NA	NA	NA	enriched	enriched	enriched	NA	enriched	enriched	enriched	depleted	depleted	NA	NA	NA	NA	NA	NA	7	2
SLC30A5	NA	NA	enriched	enriched	NA	NA	NA	enriched	NA	depleted	NA	enriched	enriched	NA	enriched	NA	NA	enriched	depleted	NA	NA	NA	7	2
SLC5A10	enriched	NA	enriched	enriched	NA	NA	NA	enriched	NA	NA	NA	enriched	enriched	enriched	NA	NA	depleted	NA	NA	NA	depleted	NA	7	2
SMPDL3B	NA	enriched	depleted	NA	NA	enriched	NA	enriched	NA	NA	NA	enriched	enriched	depleted	NA	NA	enriched	NA	NA	NA	NA	enriched	7	2
SPACA9	NA	enriched	enriched	NA	NA	enriched	NA	depleted	depleted	NA	NA	enriched	NA	enriched	NA	NA	NA	NA	NA	NA	enriched	enriched	7	2
SPRED1	NA	enriched	enriched	NA	NA	NA	enriched	depleted	enriched	NA	NA	enriched	enriched	depleted	NA	NA	NA	enriched	NA	NA	NA	NA	7	2
TBC1D7-LOC100130357	enriched	enriched	NA	depleted	NA	enriched	NA	NA	NA	NA	NA	NA	enriched	NA	NA	NA	depleted	NA	enriched	NA	enriched	enriched	7	2
TDP1	NA	NA	enriched	NA	NA	NA	enriched	depleted	depleted	NA	NA	enriched	enriched	NA	enriched	NA	enriched	NA	NA	NA	NA	enriched	7	2
TTC17	NA	NA	NA	depleted	enriched	NA	enriched	NA	enriched	NA	NA	NA	enriched	enriched	enriched	NA	enriched	NA	NA	depleted	NA	NA	7	2
TXNRD2	NA	NA	NA	enriched	enriched	NA	NA	depleted	enriched	NA	NA	NA	enriched	depleted	enriched	NA	NA	enriched	NA	NA	enriched	NA	7	2
WDPCP	enriched	NA	enriched	NA	NA	NA	NA	NA	NA	NA	NA	enriched	enriched	depleted	depleted	enriched	enriched	NA	NA	NA	NA	enriched	7	2
ZFP41	NA	NA	enriched	NA	enriched	NA	NA	enriched	NA	NA	NA	enriched	NA	NA	depleted	enriched	NA	depleted	NA	NA	enriched	enriched	7	2
ZKSCAN7	NA	NA	NA	NA	NA	enriched	NA	enriched	enriched	NA	NA	NA	NA	enriched	enriched	depleted	NA	enriched	NA	enriched	depleted	NA	7	2
ZNF496	enriched	NA	NA	NA	NA	NA	enriched	depleted	depleted	NA	NA	NA	enriched	enriched	enriched	NA	NA	enriched	enriched	NA	NA	NA	7	2
ACYP2	NA	NA	NA	enriched	NA	NA	enriched	depleted	depleted	NA	enriched	NA	NA	enriched	enriched	NA	enriched	enriched	NA	depleted	NA	NA	7	3
ASTN2	NA	NA	enriched	enriched	enriched	enriched	depleted	depleted	enriched	NA	NA	NA	NA	NA	depleted	NA	enriched	NA	NA	NA	enriched	NA	7	3
ATF7	NA	enriched	enriched	NA	NA	NA	NA	NA	depleted	NA	NA	enriched	enriched	enriched	depleted	NA	depleted	NA	NA	NA	enriched	enriched	7	3
BCCIP	enriched	NA	depleted	enriched	NA	depleted	NA	enriched	NA	enriched	NA	NA	NA	depleted	enriched	NA	NA	enriched	NA	enriched	NA	NA	7	3
BCL7C	NA	enriched	NA	depleted	NA	enriched	NA	NA	enriched	NA	NA	enriched	enriched	NA	depleted	NA	NA	depleted	NA	enriched	NA	enriched	7	3
CDC23	enriched	enriched	enriched	NA	NA	NA	enriched	NA	depleted	depleted	NA	enriched	NA	enriched	NA	NA	NA	depleted	enriched	NA	NA	NA	7	3
DCBLD2	NA	NA	NA	enriched	NA	depleted	enriched	depleted	NA	NA	enriched	NA	enriched	enriched	enriched	NA	NA	enriched	NA	depleted	NA	NA	7	3
KATNAL1	enriched	NA	enriched	NA	NA	NA	NA	depleted	NA	NA	NA	enriched	enriched	depleted	enriched	NA	depleted	NA	NA	NA	enriched	enriched	7	3
KHDC1	enriched	NA	NA	NA	enriched	NA	NA	NA	NA	enriched	NA	NA	enriched	depleted	NA	enriched	NA	depleted	enriched	NA	depleted	enriched	7	3
LHPP	enriched	NA	NA	NA	NA	NA	NA	depleted	depleted	depleted	enriched	enriched	NA	enriched	enriched	NA	NA	NA	NA	NA	enriched	enriched	7	3
MTERF4	enriched	NA	enriched	depleted	enriched	enriched	NA	NA	NA	NA	NA	NA	enriched	depleted	enriched	NA	enriched	depleted	NA	NA	NA	NA	7	3
MTRF1	enriched	NA	depleted	enriched	enriched	NA	NA	NA	depleted	NA	enriched	NA	enriched	depleted	enriched	NA	enriched	NA	NA	NA	NA	NA	7	3
NPEPL1	enriched	NA	NA	depleted	NA	enriched	enriched	depleted	NA	NA	NA	enriched	enriched	NA	enriched	NA	NA	enriched	NA	depleted	NA	NA	7	3
PABPC1L	enriched	enriched	enriched	NA	NA	enriched	NA	enriched	depleted	NA	NA	NA	enriched	NA	depleted	NA	NA	NA	enriched	NA	depleted	NA	7	3
POLI	enriched	NA	enriched	NA	NA	NA	NA	enriched	depleted	depleted	NA	NA	NA	NA	enriched	enriched	NA	enriched	enriched	depleted	NA	NA	7	3
SIN3B	enriched	NA	enriched	NA	NA	NA	NA	NA	NA	NA	NA	enriched	enriched	NA	depleted	enriched	depleted	NA	enriched	depleted	NA	enriched	7	3
STAU1	NA	NA	enriched	enriched	NA	NA	depleted	NA	enriched	enriched	enriched	NA	NA	depleted	NA	NA	depleted	NA	NA	enriched	NA	enriched	7	3
SUSD1	NA	enriched	enriched	depleted	NA	NA	NA	depleted	NA	enriched	NA	enriched	enriched	enriched	NA	NA	depleted	enriched	NA	NA	NA	NA	7	3
TGFB1I1	enriched	NA	NA	NA	enriched	enriched	depleted	NA	depleted	enriched	NA	NA	NA	NA	depleted	NA	enriched	NA	NA	enriched	NA	enriched	7	3
TMEM164	NA	NA	NA	enriched	NA	NA	NA	NA	NA	depleted	enriched	enriched	enriched	enriched	enriched	NA	depleted	enriched	NA	depleted	NA	NA	7	3
TRIO	NA	enriched	enriched	NA	NA	NA	NA	NA	depleted	NA	enriched	enriched	enriched	NA	enriched	NA	depleted	NA	depleted	NA	NA	enriched	7	3
TRIP11	enriched	NA	depleted	enriched	enriched	NA	NA	depleted	NA	NA	NA	NA	enriched	enriched	NA	NA	depleted	NA	NA	NA	enriched	enriched	7	3
ZNF682	depleted	NA	enriched	NA	enriched	enriched	NA	NA	NA	NA	NA	enriched	enriched	enriched	depleted	NA	NA	enriched	NA	NA	NA	depleted	7	3
ZRANB3	NA	NA	enriched	depleted	enriched	enriched	NA	NA	NA	NA	NA	enriched	enriched	enriched	depleted	NA	NA	depleted	NA	NA	enriched	NA	7	3
ACTR3C	enriched	NA	enriched	depleted	NA	NA	NA	enriched	depleted	depleted	NA	enriched	enriched	NA	depleted	enriched	NA	enriched	NA	NA	NA	NA	7	4
CNTLN	enriched	NA	enriched	depleted	enriched	enriched	NA	NA	depleted	depleted	NA	NA	NA	enriched	depleted	enriched	NA	enriched	NA	NA	NA	NA	7	4
CP	enriched	NA	NA	depleted	NA	enriched	NA	NA	enriched	enriched	depleted	enriched	NA	enriched	depleted	NA	NA	depleted	NA	NA	NA	enriched	7	4
CRTC3	NA	enriched	enriched	depleted	enriched	NA	NA	NA	depleted	depleted	NA	enriched	enriched	NA	depleted	enriched	NA	NA	NA	NA	enriched	NA	7	4
CTSC	depleted	depleted	depleted	NA	NA	NA	enriched	NA	enriched	NA	NA	enriched	enriched	enriched	enriched	NA	NA	enriched	NA	NA	NA	depleted	7	4
DCP2	enriched	NA	NA	enriched	NA	enriched	NA	depleted	enriched	enriched	enriched	NA	depleted	NA	depleted	NA	NA	depleted	NA	NA	NA	enriched	7	4
DMXL1	enriched	depleted	depleted	enriched	enriched	NA	NA	enriched	NA	NA	NA	enriched	NA	enriched	depleted	NA	enriched	NA	NA	NA	NA	depleted	7	4
DPF3	enriched	enriched	enriched	depleted	NA	NA	NA	NA	NA	enriched	depleted	NA	NA	NA	depleted	NA	depleted	enriched	enriched	NA	NA	enriched	7	4
FARP2	enriched	NA	enriched	NA	NA	enriched	enriched	depleted	depleted	NA	depleted	NA	enriched	NA	depleted	NA	NA	enriched	enriched	NA	NA	NA	7	4
FGGY	NA	enriched	NA	enriched	depleted	NA	NA	NA	depleted	depleted	depleted	enriched	enriched	enriched	enriched	NA	NA	enriched	NA	NA	NA	NA	7	4
HNRNPD	enriched	NA	depleted	depleted	NA	NA	NA	enriched	enriched	enriched	NA	NA	enriched	NA	depleted	enriched	NA	enriched	NA	NA	depleted	NA	7	4
KLC1	NA	NA	NA	depleted	NA	depleted	NA	enriched	NA	NA	NA	enriched	NA	enriched	enriched	enriched	NA	depleted	NA	enriched	depleted	enriched	7	4
LETM2	enriched	enriched	enriched	depleted	enriched	NA	NA	depleted	depleted	NA	NA	NA	NA	enriched	depleted	NA	enriched	NA	NA	NA	enriched	NA	7	4
LRRC69	NA	NA	depleted	NA	NA	NA	NA	NA	enriched	enriched	depleted	NA	depleted	enriched	enriched	NA	NA	enriched	enriched	enriched	depleted	NA	7	4
MVB12A	enriched	NA	enriched	depleted	enriched	enriched	enriched	NA	NA	depleted	NA	NA	NA	depleted	NA	NA	enriched	enriched	NA	NA	depleted	NA	7	4
OAS2	enriched	NA	depleted	NA	NA	NA	depleted	depleted	NA	enriched	enriched	enriched	NA	NA	enriched	NA	depleted	enriched	NA	NA	NA	enriched	7	4
RPL17-C18orf32	depleted	depleted	NA	enriched	enriched	enriched	NA	NA	enriched	enriched	NA	NA	enriched	NA	depleted	NA	enriched	NA	NA	NA	NA	depleted	7	4
SENP7	NA	NA	enriched	depleted	enriched	NA	NA	enriched	enriched	NA	NA	enriched	NA	NA	depleted	NA	NA	depleted	depleted	NA	enriched	enriched	7	4
SSFA2	NA	NA	NA	enriched	enriched	NA	NA	depleted	depleted	depleted	NA	NA	enriched	NA	enriched	NA	enriched	NA	enriched	depleted	NA	enriched	7	4
ST7	NA	depleted	NA	NA	enriched	enriched	enriched	NA	NA	enriched	NA	NA	NA	enriched	depleted	depleted	enriched	enriched	NA	NA	NA	depleted	7	4
SUV39H2	NA	enriched	enriched	depleted	enriched	NA	enriched	depleted	depleted	NA	NA	enriched	enriched	NA	depleted	NA	NA	NA	NA	NA	enriched	NA	7	4
TIMM8A	enriched	NA	NA	enriched	NA	NA	enriched	NA	NA	enriched	NA	NA	NA	depleted	enriched	NA	depleted	depleted	depleted	enriched	enriched	NA	7	4
TRIM37	NA	NA	depleted	enriched	NA	enriched	NA	depleted	enriched	NA	enriched	enriched	enriched	NA	NA	depleted	enriched	NA	NA	depleted	NA	NA	7	4
WNT2B	enriched	depleted	enriched	depleted	NA	NA	NA	enriched	NA	NA	depleted	NA	NA	enriched	enriched	NA	enriched	NA	NA	NA	depleted	enriched	7	4
ZCCHC10	enriched	enriched	enriched	depleted	NA	NA	depleted	enriched	NA	NA	NA	NA	NA	NA	depleted	enriched	NA	depleted	NA	enriched	NA	enriched	7	4
ZNF654	enriched	NA	NA	NA	enriched	depleted	NA	NA	depleted	NA	NA	enriched	enriched	NA	enriched	NA	NA	enriched	NA	depleted	depleted	enriched	7	4
ACO2	enriched	NA	enriched	depleted	enriched	enriched	NA	depleted	NA	NA	depleted	NA	NA	enriched	depleted	NA	enriched	NA	NA	NA	depleted	enriched	7	5
AMACR	NA	enriched	enriched	depleted	depleted	NA	NA	depleted	depleted	NA	NA	enriched	enriched	enriched	NA	enriched	depleted	NA	NA	NA	NA	enriched	7	5
APOBEC3F	depleted	enriched	NA	enriched	NA	NA	NA	enriched	depleted	NA	enriched	NA	NA	enriched	enriched	NA	depleted	depleted	depleted	NA	NA	enriched	7	5
C21orf59-TCP10L	NA	NA	enriched	depleted	NA	NA	NA	enriched	NA	NA	depleted	depleted	depleted	enriched	NA	enriched	NA	depleted	NA	enriched	enriched	enriched	7	5
C8orf44-SGK3	NA	NA	NA	enriched	enriched	enriched	NA	depleted	depleted	NA	NA	enriched	enriched	NA	enriched	depleted	enriched	depleted	NA	depleted	NA	NA	7	5
CAMSAP2	enriched	NA	enriched	NA	NA	NA	NA	depleted	depleted	depleted	NA	NA	enriched	enriched	enriched	NA	NA	enriched	NA	depleted	depleted	enriched	7	5
EXOC6B	NA	NA	enriched	depleted	NA	enriched	NA	NA	depleted	depleted	depleted	enriched	NA	enriched	enriched	NA	NA	enriched	NA	depleted	enriched	NA	7	5
GPATCH2	enriched	NA	NA	NA	enriched	NA	NA	depleted	depleted	depleted	NA	NA	enriched	enriched	enriched	NA	NA	enriched	NA	depleted	enriched	depleted	7	5
LONP2	NA	enriched	enriched	depleted	NA	depleted	depleted	enriched	depleted	NA	NA	enriched	enriched	enriched	NA	NA	NA	depleted	NA	NA	enriched	NA	7	5
NDUFC2-KCTD14	NA	enriched	depleted	NA	depleted	NA	NA	enriched	depleted	NA	enriched	NA	enriched	depleted	enriched	enriched	depleted	NA	NA	NA	enriched	NA	7	5
NRG1	NA	enriched	enriched	depleted	enriched	NA	NA	NA	depleted	NA	NA	enriched	enriched	depleted	depleted	NA	enriched	depleted	NA	NA	enriched	NA	7	5
SNED1	NA	NA	NA	enriched	enriched	depleted	NA	enriched	depleted	enriched	enriched	NA	NA	depleted	enriched	NA	NA	depleted	NA	depleted	NA	enriched	7	5
SPIN3	NA	NA	depleted	NA	NA	NA	enriched	enriched	depleted	NA	NA	NA	enriched	enriched	NA	enriched	enriched	enriched	NA	depleted	depleted	depleted	7	5
SPTB	enriched	enriched	enriched	enriched	NA	NA	NA	depleted	depleted	depleted	NA	enriched	NA	depleted	NA	NA	NA	depleted	NA	NA	enriched	enriched	7	5
TOMM70	enriched	NA	NA	depleted	NA	enriched	enriched	depleted	depleted	depleted	NA	NA	enriched	enriched	enriched	NA	NA	enriched	NA	NA	NA	depleted	7	5
TRAK1	NA	enriched	enriched	depleted	NA	enriched	NA	NA	depleted	depleted	NA	enriched	enriched	NA	depleted	enriched	NA	NA	enriched	depleted	NA	NA	7	5
TXNRD1	NA	NA	enriched	NA	enriched	enriched	depleted	NA	enriched	depleted	depleted	NA	NA	depleted	enriched	enriched	NA	enriched	depleted	NA	NA	NA	7	5
WDR20	enriched	enriched	enriched	NA	depleted	NA	depleted	NA	depleted	NA	NA	NA	NA	NA	depleted	enriched	NA	depleted	enriched	NA	enriched	enriched	7	5
ZNF655	enriched	enriched	enriched	depleted	depleted	NA	NA	NA	NA	NA	NA	enriched	enriched	enriched	depleted	NA	depleted	depleted	NA	NA	NA	enriched	7	5
ABHD12	NA	enriched	enriched	depleted	enriched	NA	NA	depleted	enriched	depleted	NA	NA	NA	depleted	NA	NA	enriched	depleted	NA	depleted	enriched	enriched	7	6
CEP83	NA	NA	enriched	NA	enriched	NA	NA	NA	depleted	depleted	depleted	NA	enriched	enriched	depleted	NA	enriched	depleted	NA	depleted	enriched	enriched	7	6
ERCC1	NA	NA	NA	depleted	depleted	enriched	NA	enriched	enriched	NA	NA	enriched	NA	enriched	depleted	depleted	depleted	enriched	depleted	enriched	NA	NA	7	6
NECTIN3	depleted	NA	enriched	NA	depleted	depleted	NA	enriched	enriched	NA	NA	NA	enriched	NA	enriched	NA	depleted	depleted	depleted	NA	enriched	enriched	7	6
ARPC4-TTLL3	NA	enriched	enriched	depleted	NA	enriched	NA	NA	depleted	depleted	NA	NA	enriched	NA	enriched	NA	depleted	depleted	enriched	depleted	depleted	enriched	7	7
FANCC	depleted	NA	NA	enriched	enriched	NA	NA	enriched	depleted	depleted	NA	NA	NA	enriched	enriched	depleted	enriched	depleted	depleted	NA	enriched	depleted	7	7
FRMD4B	NA	NA	depleted	enriched	enriched	NA	enriched	enriched	NA	depleted	enriched	NA	NA	depleted	depleted	depleted	NA	depleted	NA	enriched	enriched	depleted	7	7
MECOM	NA	NA	depleted	depleted	enriched	NA	NA	NA	enriched	enriched	depleted	enriched	enriched	depleted	depleted	enriched	NA	NA	NA	depleted	enriched	depleted	7	7
MINOS1-NBL1	enriched	NA	enriched	depleted	NA	depleted	depleted	enriched	depleted	depleted	NA	enriched	enriched	depleted	depleted	NA	NA	NA	NA	NA	enriched	enriched	7	7
TM2D3	NA	depleted	depleted	depleted	enriched	enriched	enriched	NA	enriched	NA	depleted	NA	enriched	enriched	depleted	NA	enriched	NA	NA	NA	depleted	depleted	7	7
ABCD1	enriched	NA	enriched	NA	enriched	NA	NA	NA	NA	NA	NA	NA	enriched	NA	NA	NA	enriched	NA	NA	NA	NA	enriched	6	0
AMDHD1	NA	NA	enriched	NA	NA	NA	enriched	enriched	NA	NA	NA	NA	enriched	enriched	NA	NA	enriched	NA	NA	NA	NA	NA	6	0
ANKRD36C	enriched	enriched	enriched	NA	NA	NA	enriched	NA	NA	NA	NA	NA	NA	NA	NA	NA	NA	NA	enriched	NA	enriched	NA	6	0
ANO6	NA	NA	enriched	NA	NA	NA	NA	enriched	enriched	NA	NA	NA	enriched	NA	enriched	NA	NA	enriched	NA	NA	NA	NA	6	0
ATOX1	NA	NA	enriched	enriched	NA	NA	NA	enriched	NA	NA	NA	NA	NA	enriched	enriched	NA	NA	NA	NA	NA	enriched	NA	6	0
BAIAP2	NA	NA	NA	enriched	NA	enriched	NA	NA	enriched	enriched	enriched	NA	NA	NA	NA	NA	NA	NA	enriched	NA	NA	NA	6	0
C8orf76	enriched	NA	NA	enriched	NA	NA	enriched	NA	NA	NA	NA	NA	NA	NA	enriched	NA	enriched	NA	NA	NA	NA	enriched	6	0
CACNA2D1	enriched	NA	NA	NA	enriched	NA	NA	enriched	NA	NA	NA	NA	NA	enriched	NA	NA	NA	NA	enriched	NA	NA	enriched	6	0
CASK	NA	NA	enriched	enriched	enriched	NA	NA	NA	NA	NA	NA	NA	enriched	NA	NA	NA	NA	NA	NA	NA	enriched	enriched	6	0
CCDC66	enriched	NA	NA	enriched	enriched	NA	NA	NA	NA	NA	NA	NA	enriched	NA	NA	NA	enriched	NA	NA	NA	NA	enriched	6	0
CDH22	NA	NA	enriched	NA	NA	NA	enriched	NA	NA	enriched	NA	NA	NA	NA	NA	NA	NA	enriched	enriched	NA	NA	enriched	6	0
COG5	enriched	NA	NA	enriched	NA	enriched	NA	enriched	NA	NA	NA	NA	NA	enriched	NA	enriched	NA	NA	NA	NA	NA	NA	6	0
COL4A3	NA	NA	NA	NA	NA	NA	NA	enriched	enriched	enriched	NA	enriched	enriched	enriched	NA	NA	NA	NA	NA	NA	NA	NA	6	0
DOK1	NA	NA	enriched	NA	NA	NA	enriched	NA	NA	NA	NA	NA	enriched	NA	enriched	enriched	NA	enriched	NA	NA	NA	NA	6	0
FAM118A	NA	NA	enriched	NA	enriched	NA	NA	enriched	NA	NA	NA	NA	NA	NA	enriched	enriched	NA	NA	NA	NA	NA	enriched	6	0
GRIN2A	enriched	NA	enriched	NA	enriched	NA	NA	enriched	NA	NA	NA	NA	NA	NA	NA	enriched	enriched	NA	NA	NA	NA	NA	6	0
GUCY1A3	enriched	NA	NA	NA	NA	NA	NA	NA	NA	enriched	NA	enriched	enriched	NA	NA	NA	NA	NA	NA	NA	enriched	enriched	6	0
HELB	NA	NA	enriched	NA	enriched	NA	enriched	NA	NA	NA	NA	NA	NA	enriched	NA	NA	NA	NA	NA	NA	enriched	enriched	6	0
HEXDC	NA	NA	NA	enriched	NA	NA	enriched	NA	enriched	enriched	enriched	NA	enriched	NA	NA	NA	NA	NA	NA	NA	NA	NA	6	0
2022-03-07	NA	NA	NA	NA	NA	enriched	NA	NA	NA	NA	NA	NA	NA	enriched	enriched	NA	enriched	enriched	NA	NA	NA	enriched	6	0
MSTO1	enriched	NA	NA	NA	NA	NA	NA	NA	NA	NA	enriched	enriched	enriched	NA	enriched	NA	NA	enriched	NA	NA	NA	NA	6	0
NCAPG2	enriched	enriched	NA	NA	NA	NA	NA	NA	NA	NA	NA	enriched	enriched	NA	NA	NA	enriched	NA	enriched	NA	NA	NA	6	0
PEX6	enriched	NA	NA	NA	enriched	NA	enriched	NA	NA	NA	NA	NA	enriched	NA	enriched	NA	NA	enriched	NA	NA	NA	NA	6	0
PRKACB	NA	NA	enriched	enriched	NA	NA	NA	enriched	NA	NA	NA	NA	NA	enriched	NA	NA	NA	enriched	NA	enriched	NA	NA	6	0
PRTG	NA	NA	enriched	NA	NA	NA	NA	enriched	enriched	NA	NA	NA	enriched	NA	NA	NA	NA	enriched	NA	NA	NA	enriched	6	0
SEC22C	enriched	NA	enriched	NA	NA	NA	enriched	NA	NA	NA	NA	enriched	enriched	NA	NA	NA	enriched	NA	NA	NA	NA	NA	6	0
SGIP1	NA	enriched	NA	NA	NA	NA	NA	enriched	NA	NA	NA	enriched	enriched	NA	NA	NA	NA	enriched	NA	enriched	NA	NA	6	0
SLIT2	enriched	NA	NA	NA	NA	NA	NA	NA	NA	NA	NA	NA	NA	enriched	enriched	enriched	NA	enriched	NA	NA	NA	enriched	6	0
TMEM254	NA	NA	NA	enriched	NA	enriched	enriched	NA	NA	NA	NA	NA	enriched	NA	enriched	NA	NA	enriched	NA	NA	NA	NA	6	0
TNS4	enriched	NA	enriched	NA	NA	enriched	enriched	NA	NA	NA	NA	NA	enriched	enriched	NA	NA	NA	NA	NA	NA	NA	NA	6	0
USP4	enriched	NA	NA	enriched	enriched	enriched	NA	NA	NA	NA	enriched	NA	NA	NA	NA	NA	enriched	NA	NA	NA	NA	NA	6	0
YAP1	enriched	NA	enriched	NA	NA	NA	NA	NA	NA	NA	NA	NA	enriched	NA	NA	NA	NA	enriched	enriched	NA	NA	enriched	6	0
ZDHHC3	enriched	NA	NA	NA	NA	NA	enriched	NA	enriched	enriched	NA	NA	NA	enriched	NA	NA	NA	NA	enriched	NA	NA	NA	6	0
ZNF3	NA	NA	enriched	NA	NA	enriched	NA	NA	NA	enriched	NA	enriched	NA	NA	enriched	NA	NA	enriched	NA	NA	NA	NA	6	0
ZNF414	enriched	NA	enriched	NA	NA	NA	enriched	enriched	NA	enriched	NA	NA	enriched	NA	NA	NA	NA	NA	NA	NA	NA	NA	6	0
ZNF83	enriched	NA	enriched	NA	NA	NA	NA	NA	NA	NA	NA	NA	NA	enriched	enriched	NA	enriched	enriched	NA	NA	NA	NA	6	0
ZXDC	NA	NA	NA	enriched	NA	NA	NA	enriched	NA	enriched	NA	NA	NA	NA	enriched	NA	NA	enriched	NA	NA	enriched	NA	6	0
ABCA3	NA	NA	NA	depleted	enriched	NA	NA	NA	NA	NA	NA	enriched	enriched	enriched	NA	NA	NA	enriched	NA	NA	NA	enriched	6	1
ADGRL3	enriched	NA	NA	NA	NA	NA	NA	enriched	enriched	enriched	NA	NA	NA	NA	enriched	NA	depleted	enriched	NA	NA	NA	NA	6	1
AGBL3	NA	NA	depleted	enriched	NA	enriched	NA	enriched	NA	NA	NA	NA	enriched	NA	NA	NA	NA	enriched	enriched	NA	NA	NA	6	1
AGL	NA	NA	NA	enriched	enriched	NA	NA	NA	NA	NA	enriched	NA	NA	NA	enriched	NA	NA	enriched	NA	depleted	NA	enriched	6	1
ANKRD12	enriched	NA	enriched	depleted	NA	NA	NA	enriched	NA	NA	NA	enriched	enriched	enriched	NA	NA	NA	NA	NA	NA	NA	NA	6	1
ARHGAP26	NA	NA	NA	NA	enriched	NA	enriched	NA	NA	NA	NA	NA	enriched	depleted	NA	NA	enriched	enriched	enriched	NA	NA	NA	6	1
CA8	NA	enriched	enriched	NA	NA	enriched	NA	enriched	NA	NA	NA	NA	NA	NA	NA	NA	NA	enriched	NA	NA	depleted	enriched	6	1
CCDC169-SOHLH2	enriched	NA	enriched	NA	NA	NA	NA	NA	depleted	NA	NA	NA	NA	NA	enriched	enriched	NA	enriched	NA	NA	NA	enriched	6	1
CD96	enriched	NA	depleted	NA	NA	enriched	enriched	NA	NA	NA	NA	NA	enriched	enriched	NA	NA	NA	NA	NA	NA	enriched	NA	6	1
CENPN	NA	NA	enriched	NA	NA	NA	NA	enriched	NA	NA	enriched	enriched	NA	NA	depleted	NA	NA	enriched	NA	enriched	NA	NA	6	1
CEP70	NA	NA	NA	NA	enriched	NA	NA	NA	NA	NA	enriched	enriched	enriched	enriched	NA	NA	depleted	enriched	NA	NA	NA	NA	6	1
CHD6	enriched	NA	enriched	NA	NA	NA	NA	NA	depleted	NA	NA	NA	enriched	enriched	enriched	NA	NA	enriched	NA	NA	NA	NA	6	1
DST	NA	NA	enriched	NA	NA	NA	NA	NA	NA	NA	NA	enriched	enriched	enriched	enriched	NA	NA	enriched	NA	NA	depleted	NA	6	1
EEF1AKMT4-ECE2	NA	enriched	NA	NA	enriched	enriched	NA	NA	NA	NA	NA	NA	NA	NA	depleted	enriched	enriched	NA	enriched	NA	NA	NA	6	1
EGFR	NA	NA	enriched	enriched	enriched	NA	NA	NA	depleted	NA	enriched	NA	NA	NA	enriched	NA	enriched	NA	NA	NA	NA	NA	6	1
EMC2	NA	NA	enriched	NA	enriched	NA	NA	NA	NA	NA	NA	NA	enriched	depleted	NA	NA	NA	NA	enriched	NA	enriched	enriched	6	1
FAHD2A	enriched	enriched	NA	enriched	NA	NA	NA	NA	NA	depleted	enriched	NA	NA	NA	NA	enriched	NA	NA	enriched	NA	NA	NA	6	1
FAM122B	enriched	enriched	enriched	enriched	NA	NA	NA	NA	NA	NA	NA	NA	enriched	NA	depleted	NA	NA	enriched	NA	NA	NA	NA	6	1
FBXO10	enriched	NA	enriched	NA	NA	NA	enriched	enriched	NA	NA	NA	enriched	NA	NA	enriched	NA	NA	NA	depleted	NA	NA	NA	6	1
GCA	NA	NA	enriched	NA	NA	NA	enriched	NA	NA	NA	NA	enriched	enriched	enriched	NA	NA	NA	enriched	depleted	NA	NA	NA	6	1
GTF2E2	enriched	NA	enriched	depleted	NA	NA	NA	NA	NA	NA	NA	NA	enriched	NA	enriched	enriched	NA	NA	NA	NA	NA	enriched	6	1
HTR2A	enriched	NA	enriched	NA	NA	NA	NA	enriched	NA	NA	NA	NA	NA	NA	NA	enriched	NA	depleted	NA	enriched	enriched	NA	6	1
HUS1	enriched	NA	enriched	NA	enriched	NA	NA	NA	NA	NA	NA	NA	enriched	NA	NA	NA	NA	depleted	enriched	NA	NA	enriched	6	1
IQCE	enriched	NA	enriched	NA	NA	NA	enriched	enriched	NA	NA	NA	NA	enriched	NA	depleted	NA	NA	NA	NA	NA	NA	enriched	6	1
L3MBTL1	enriched	NA	enriched	NA	NA	enriched	NA	NA	depleted	NA	NA	NA	enriched	NA	NA	NA	NA	NA	enriched	NA	NA	enriched	6	1
LARP1	enriched	NA	NA	enriched	NA	NA	NA	NA	NA	NA	NA	enriched	enriched	NA	enriched	NA	depleted	enriched	NA	NA	NA	NA	6	1
LYRM1	enriched	NA	NA	NA	enriched	NA	enriched	NA	NA	enriched	NA	NA	NA	NA	enriched	NA	NA	NA	NA	NA	depleted	enriched	6	1
MASP1	NA	NA	NA	enriched	NA	enriched	NA	enriched	NA	enriched	NA	NA	NA	NA	enriched	NA	NA	enriched	NA	NA	NA	depleted	6	1
MIPOL1	enriched	NA	NA	NA	enriched	NA	NA	NA	NA	NA	NA	enriched	enriched	depleted	NA	NA	enriched	NA	NA	NA	NA	enriched	6	1
MYO5C	NA	NA	enriched	NA	NA	depleted	enriched	NA	NA	NA	NA	enriched	enriched	NA	enriched	NA	NA	enriched	NA	NA	NA	NA	6	1
NADSYN1	NA	NA	NA	NA	enriched	enriched	NA	NA	depleted	NA	NA	NA	enriched	enriched	NA	NA	enriched	enriched	NA	NA	NA	NA	6	1
NPAS2	NA	NA	enriched	NA	NA	enriched	NA	NA	NA	NA	NA	NA	enriched	enriched	enriched	NA	NA	enriched	NA	depleted	NA	NA	6	1
PCOLCE2	NA	NA	NA	NA	enriched	NA	NA	enriched	NA	NA	NA	NA	NA	depleted	enriched	NA	enriched	NA	NA	enriched	enriched	NA	6	1
PHF21B	enriched	NA	NA	NA	NA	enriched	NA	enriched	NA	NA	NA	NA	NA	depleted	NA	enriched	NA	NA	enriched	NA	NA	enriched	6	1
PLSCR1	NA	enriched	depleted	NA	enriched	NA	NA	NA	NA	NA	NA	enriched	enriched	enriched	NA	NA	enriched	NA	NA	NA	NA	NA	6	1
RGS12	enriched	NA	NA	NA	NA	enriched	NA	enriched	enriched	NA	NA	NA	NA	enriched	depleted	NA	NA	enriched	NA	NA	NA	NA	6	1
SGSM1	enriched	NA	NA	NA	NA	enriched	NA	NA	NA	NA	NA	NA	enriched	NA	depleted	NA	enriched	NA	enriched	NA	NA	enriched	6	1
SNX14	NA	NA	NA	depleted	enriched	NA	NA	enriched	NA	NA	NA	enriched	NA	NA	enriched	enriched	NA	enriched	NA	NA	NA	NA	6	1
TECPR2	enriched	NA	enriched	NA	NA	NA	NA	NA	NA	NA	NA	enriched	enriched	NA	depleted	NA	NA	enriched	NA	NA	NA	enriched	6	1
THAP6	NA	enriched	NA	NA	enriched	NA	NA	NA	NA	NA	NA	NA	NA	enriched	enriched	NA	NA	enriched	depleted	NA	enriched	NA	6	1
TIGD4	enriched	NA	enriched	NA	NA	NA	NA	enriched	NA	NA	NA	NA	enriched	NA	NA	NA	enriched	NA	NA	enriched	depleted	NA	6	1
TM2D1	NA	NA	NA	enriched	NA	NA	NA	enriched	NA	NA	NA	NA	NA	NA	depleted	enriched	enriched	enriched	NA	NA	NA	enriched	6	1
TMEM105	enriched	NA	NA	NA	NA	NA	NA	NA	enriched	enriched	NA	NA	enriched	depleted	enriched	NA	enriched	NA	NA	NA	NA	NA	6	1
TMEM182	NA	enriched	enriched	NA	enriched	NA	NA	NA	NA	depleted	NA	NA	NA	enriched	NA	NA	enriched	NA	NA	NA	enriched	NA	6	1
WNK2	enriched	NA	NA	NA	enriched	NA	NA	NA	NA	NA	NA	NA	NA	enriched	NA	enriched	enriched	enriched	NA	NA	depleted	NA	6	1
ZBTB44	NA	enriched	NA	enriched	NA	enriched	NA	NA	NA	NA	NA	enriched	enriched	depleted	NA	NA	NA	NA	NA	NA	NA	enriched	6	1
ZNF85	depleted	enriched	NA	NA	NA	NA	NA	NA	NA	NA	NA	enriched	enriched	enriched	enriched	NA	NA	NA	enriched	NA	NA	NA	6	1
ABCB8	NA	NA	enriched	NA	enriched	NA	enriched	NA	NA	NA	NA	enriched	NA	depleted	depleted	NA	NA	NA	enriched	enriched	NA	NA	6	2
AGO3	NA	enriched	enriched	depleted	enriched	NA	NA	NA	NA	NA	NA	enriched	NA	NA	depleted	enriched	NA	NA	NA	NA	NA	enriched	6	2
APLF	enriched	enriched	enriched	NA	NA	depleted	NA	NA	depleted	NA	NA	NA	NA	enriched	NA	enriched	NA	enriched	NA	NA	NA	NA	6	2
ATP10D	enriched	NA	enriched	NA	NA	NA	NA	enriched	NA	NA	NA	NA	NA	depleted	enriched	NA	NA	enriched	depleted	NA	NA	enriched	6	2
ATP2C1	enriched	NA	enriched	enriched	NA	enriched	NA	NA	NA	NA	NA	NA	NA	NA	depleted	NA	NA	depleted	NA	enriched	NA	enriched	6	2
BCHE	NA	enriched	NA	NA	NA	enriched	NA	NA	NA	NA	NA	enriched	enriched	NA	depleted	enriched	NA	NA	enriched	NA	depleted	NA	6	2
C12orf29	NA	NA	enriched	depleted	enriched	NA	NA	NA	NA	NA	NA	enriched	enriched	NA	NA	NA	NA	enriched	NA	depleted	NA	enriched	6	2
CELF1	NA	NA	enriched	enriched	NA	NA	enriched	enriched	NA	enriched	NA	NA	depleted	NA	enriched	NA	NA	NA	NA	NA	depleted	NA	6	2
CHEK2	enriched	enriched	enriched	NA	NA	enriched	NA	NA	depleted	depleted	NA	NA	NA	NA	NA	enriched	NA	enriched	NA	NA	NA	NA	6	2
CPT1A	enriched	NA	NA	enriched	enriched	depleted	NA	NA	NA	depleted	NA	NA	NA	enriched	enriched	NA	NA	enriched	NA	NA	NA	NA	6	2
CREBZF	NA	enriched	enriched	NA	NA	enriched	enriched	NA	NA	NA	depleted	enriched	NA	NA	NA	NA	NA	NA	enriched	NA	NA	depleted	6	2
DGKE	enriched	enriched	NA	NA	NA	depleted	NA	NA	depleted	NA	NA	enriched	enriched	NA	NA	NA	NA	enriched	NA	NA	NA	enriched	6	2
DNAH14	NA	NA	enriched	NA	NA	enriched	NA	enriched	depleted	NA	NA	enriched	NA	enriched	enriched	NA	NA	NA	NA	NA	depleted	NA	6	2
DPY30	NA	NA	enriched	depleted	NA	NA	NA	depleted	NA	NA	NA	enriched	enriched	NA	NA	NA	enriched	NA	enriched	NA	enriched	NA	6	2
DTNB	enriched	NA	NA	NA	NA	enriched	NA	NA	NA	NA	NA	enriched	enriched	enriched	depleted	NA	NA	enriched	NA	NA	depleted	NA	6	2
ELOVL6	enriched	NA	NA	NA	enriched	NA	NA	NA	NA	depleted	NA	NA	enriched	NA	enriched	NA	enriched	depleted	enriched	NA	NA	NA	6	2
FBRSL1	NA	enriched	enriched	depleted	NA	NA	NA	NA	NA	NA	NA	NA	enriched	NA	enriched	NA	NA	enriched	enriched	depleted	NA	NA	6	2
FOXK1	enriched	NA	enriched	depleted	enriched	NA	enriched	NA	NA	NA	depleted	NA	NA	enriched	NA	NA	enriched	NA	NA	NA	NA	NA	6	2
GOLGA4	NA	NA	NA	enriched	enriched	enriched	enriched	depleted	NA	NA	NA	NA	enriched	NA	NA	NA	NA	enriched	NA	depleted	NA	NA	6	2
GSTCD	NA	NA	depleted	NA	enriched	NA	NA	enriched	depleted	NA	NA	NA	NA	enriched	enriched	NA	NA	enriched	NA	NA	enriched	NA	6	2
GTF2H1	enriched	NA	NA	NA	NA	NA	enriched	NA	depleted	NA	NA	enriched	enriched	depleted	enriched	NA	NA	enriched	NA	NA	NA	NA	6	2
LURAP1L	NA	NA	enriched	NA	enriched	NA	enriched	NA	NA	NA	NA	NA	NA	NA	depleted	NA	enriched	depleted	enriched	NA	NA	enriched	6	2
MAGI3	NA	NA	enriched	NA	NA	enriched	NA	depleted	NA	NA	NA	enriched	enriched	enriched	NA	NA	NA	enriched	NA	depleted	NA	NA	6	2
MAPK1	NA	NA	enriched	enriched	NA	NA	NA	enriched	enriched	enriched	NA	depleted	NA	NA	depleted	NA	NA	NA	NA	enriched	NA	NA	6	2
MKL2	enriched	NA	enriched	NA	NA	NA	NA	NA	NA	NA	depleted	enriched	NA	enriched	depleted	NA	NA	enriched	NA	NA	NA	enriched	6	2
MYCL	NA	NA	depleted	enriched	enriched	enriched	NA	depleted	NA	NA	enriched	NA	NA	NA	NA	NA	NA	NA	NA	NA	enriched	enriched	6	2
MYEF2	NA	NA	enriched	NA	NA	NA	NA	NA	NA	NA	NA	enriched	enriched	enriched	enriched	NA	NA	NA	enriched	depleted	depleted	NA	6	2
NPC1	NA	NA	NA	enriched	NA	NA	NA	enriched	depleted	NA	enriched	NA	NA	enriched	NA	NA	enriched	enriched	NA	NA	NA	depleted	6	2
PCYT1B	NA	NA	NA	NA	NA	enriched	NA	enriched	NA	enriched	NA	NA	NA	depleted	enriched	NA	NA	NA	enriched	NA	depleted	enriched	6	2
PDS5A	enriched	enriched	enriched	depleted	enriched	NA	NA	NA	depleted	NA	NA	NA	NA	NA	enriched	NA	NA	NA	NA	NA	NA	enriched	6	2
PHF20L1	enriched	NA	enriched	NA	NA	NA	NA	NA	depleted	depleted	NA	NA	NA	enriched	enriched	enriched	NA	NA	enriched	NA	NA	NA	6	2
PIAS2	NA	NA	enriched	depleted	enriched	NA	enriched	NA	NA	NA	NA	enriched	enriched	NA	enriched	NA	depleted	NA	NA	NA	NA	NA	6	2
PPP4R3B	NA	NA	NA	NA	NA	enriched	NA	NA	depleted	NA	NA	NA	enriched	enriched	enriched	NA	NA	enriched	enriched	depleted	NA	NA	6	2
PRMT2	enriched	NA	enriched	depleted	NA	enriched	NA	NA	NA	depleted	NA	NA	NA	NA	NA	enriched	enriched	enriched	NA	NA	NA	NA	6	2
RABEP1	enriched	NA	NA	depleted	NA	enriched	enriched	NA	NA	NA	NA	NA	enriched	depleted	enriched	NA	NA	enriched	NA	NA	NA	NA	6	2
RC3H2	enriched	NA	NA	NA	NA	NA	NA	enriched	NA	NA	enriched	NA	enriched	NA	depleted	NA	NA	depleted	NA	enriched	NA	enriched	6	2
RET	NA	enriched	enriched	depleted	enriched	NA	NA	enriched	NA	NA	NA	NA	NA	NA	depleted	NA	NA	NA	enriched	enriched	NA	NA	6	2
RPS6KA2	enriched	enriched	NA	enriched	enriched	NA	NA	NA	NA	NA	enriched	NA	NA	depleted	depleted	NA	NA	NA	NA	NA	enriched	NA	6	2
SLC25A37	enriched	NA	enriched	NA	NA	NA	enriched	enriched	NA	NA	NA	NA	NA	enriched	depleted	NA	depleted	enriched	NA	NA	NA	NA	6	2
SLC4A8	NA	NA	enriched	NA	NA	enriched	NA	enriched	enriched	enriched	NA	NA	NA	enriched	depleted	NA	NA	depleted	NA	NA	NA	NA	6	2
SPEG	enriched	enriched	NA	NA	NA	NA	NA	depleted	NA	NA	NA	enriched	NA	NA	enriched	NA	NA	depleted	NA	enriched	enriched	NA	6	2
TTC39B	enriched	NA	NA	enriched	NA	enriched	enriched	depleted	enriched	NA	NA	NA	enriched	NA	NA	NA	depleted	NA	NA	NA	NA	NA	6	2
URI1	enriched	NA	NA	NA	NA	NA	NA	enriched	NA	NA	NA	depleted	NA	enriched	enriched	NA	NA	enriched	enriched	NA	NA	depleted	6	2
WWP2	NA	NA	NA	NA	enriched	NA	NA	depleted	NA	NA	NA	enriched	enriched	enriched	enriched	depleted	enriched	NA	NA	NA	NA	NA	6	2
ZNF397	enriched	NA	NA	NA	enriched	NA	NA	enriched	NA	NA	NA	NA	enriched	depleted	depleted	NA	enriched	NA	NA	NA	NA	enriched	6	2
ZNF611	NA	NA	enriched	depleted	NA	NA	enriched	NA	NA	NA	NA	NA	enriched	enriched	depleted	NA	NA	enriched	enriched	NA	NA	NA	6	2
ZNF638	NA	NA	enriched	enriched	NA	NA	NA	NA	NA	enriched	NA	NA	NA	enriched	depleted	enriched	NA	enriched	NA	NA	depleted	NA	6	2
ZSCAN31	enriched	NA	NA	NA	NA	NA	NA	NA	enriched	NA	NA	NA	enriched	enriched	NA	NA	NA	enriched	depleted	NA	depleted	enriched	6	2
BCL9	NA	NA	enriched	depleted	NA	NA	enriched	NA	depleted	NA	NA	NA	NA	NA	enriched	NA	enriched	depleted	NA	enriched	NA	enriched	6	3
CFAP53	NA	NA	enriched	depleted	NA	NA	NA	enriched	depleted	NA	NA	enriched	enriched	NA	depleted	NA	NA	enriched	NA	NA	NA	enriched	6	3
CHPT1	NA	enriched	enriched	enriched	NA	NA	NA	NA	depleted	NA	NA	NA	enriched	enriched	depleted	NA	depleted	enriched	NA	NA	NA	NA	6	3
HEATR5A	NA	NA	enriched	NA	NA	depleted	NA	NA	NA	NA	NA	NA	enriched	NA	enriched	NA	depleted	enriched	NA	depleted	enriched	enriched	6	3
HSPA12A	enriched	NA	enriched	NA	NA	depleted	depleted	NA	NA	enriched	NA	NA	NA	NA	enriched	enriched	NA	NA	NA	NA	depleted	enriched	6	3
NCAM2	enriched	NA	NA	NA	depleted	depleted	depleted	NA	NA	NA	NA	enriched	enriched	enriched	enriched	enriched	NA	NA	NA	NA	NA	NA	6	3
NDUFAF7	depleted	enriched	NA	depleted	NA	enriched	depleted	enriched	NA	NA	NA	NA	enriched	NA	NA	NA	enriched	NA	NA	enriched	NA	NA	6	3
NF1	NA	NA	enriched	NA	NA	depleted	enriched	NA	depleted	depleted	NA	NA	enriched	NA	enriched	NA	NA	enriched	NA	NA	NA	enriched	6	3
NIPBL	enriched	enriched	enriched	depleted	NA	enriched	NA	NA	NA	NA	NA	NA	NA	NA	enriched	NA	depleted	depleted	NA	NA	NA	enriched	6	3
OSMR	NA	NA	NA	NA	NA	enriched	enriched	depleted	NA	NA	NA	enriched	enriched	enriched	NA	NA	depleted	enriched	NA	NA	depleted	NA	6	3
PCSK5	NA	depleted	depleted	enriched	enriched	NA	enriched	NA	NA	NA	NA	enriched	NA	NA	NA	depleted	enriched	enriched	NA	NA	NA	NA	6	3
PLEKHG1	NA	enriched	enriched	NA	NA	depleted	NA	NA	NA	enriched	enriched	enriched	enriched	NA	depleted	NA	NA	depleted	NA	NA	NA	NA	6	3
SCAF11	NA	enriched	enriched	NA	NA	NA	NA	depleted	depleted	depleted	NA	enriched	enriched	enriched	enriched	NA	NA	NA	NA	NA	NA	NA	6	3
SCP2	NA	depleted	NA	NA	enriched	NA	enriched	NA	NA	enriched	NA	NA	enriched	depleted	enriched	NA	enriched	depleted	NA	NA	NA	NA	6	3
SRSF5	NA	NA	NA	enriched	enriched	depleted	NA	enriched	NA	NA	enriched	NA	NA	depleted	NA	enriched	enriched	NA	NA	NA	depleted	NA	6	3
SYNE2	NA	NA	enriched	NA	NA	NA	enriched	NA	NA	NA	NA	NA	enriched	enriched	enriched	NA	depleted	enriched	NA	depleted	depleted	NA	6	3
THBS3	enriched	NA	enriched	enriched	NA	NA	NA	enriched	NA	NA	NA	depleted	depleted	enriched	NA	NA	enriched	NA	NA	NA	depleted	NA	6	3
THEM4	NA	NA	enriched	depleted	NA	NA	enriched	enriched	NA	NA	NA	enriched	enriched	NA	depleted	enriched	depleted	NA	NA	NA	NA	NA	6	3
TTBK2	enriched	NA	NA	NA	enriched	NA	NA	depleted	depleted	NA	NA	NA	enriched	NA	NA	NA	NA	enriched	NA	depleted	enriched	enriched	6	3
ZNF174	enriched	NA	NA	depleted	NA	NA	NA	NA	depleted	NA	NA	enriched	enriched	NA	NA	enriched	enriched	depleted	NA	NA	NA	enriched	6	3
ZNF423	enriched	NA	enriched	NA	enriched	NA	NA	NA	NA	enriched	NA	NA	enriched	NA	NA	depleted	enriched	NA	NA	depleted	depleted	NA	6	3
ZNF730	depleted	NA	enriched	NA	enriched	NA	NA	NA	NA	NA	NA	NA	enriched	enriched	depleted	enriched	enriched	NA	NA	depleted	NA	NA	6	3
ZNF789	enriched	NA	depleted	NA	NA	enriched	NA	NA	depleted	NA	NA	enriched	enriched	enriched	enriched	NA	depleted	NA	NA	NA	NA	NA	6	3
ZNF880	NA	NA	enriched	NA	NA	enriched	NA	NA	NA	enriched	NA	NA	NA	enriched	depleted	NA	depleted	depleted	NA	enriched	enriched	NA	6	3
ANOS1	NA	enriched	NA	NA	NA	depleted	enriched	NA	NA	NA	NA	enriched	enriched	depleted	depleted	NA	NA	NA	depleted	enriched	enriched	NA	6	4
ATP8B3	NA	NA	NA	NA	NA	enriched	depleted	NA	NA	enriched	enriched	enriched	NA	depleted	NA	NA	NA	depleted	NA	depleted	enriched	enriched	6	4
CEP76	NA	NA	enriched	NA	depleted	enriched	NA	depleted	NA	enriched	NA	NA	enriched	NA	depleted	depleted	NA	enriched	NA	NA	enriched	NA	6	4
CREBRF	enriched	NA	enriched	NA	NA	NA	NA	depleted	depleted	depleted	NA	NA	enriched	NA	enriched	NA	depleted	enriched	NA	NA	NA	enriched	6	4
ELAC2	NA	NA	enriched	NA	enriched	NA	NA	depleted	NA	NA	NA	enriched	enriched	NA	NA	NA	enriched	enriched	depleted	depleted	NA	depleted	6	4
FBXO17	NA	NA	enriched	enriched	enriched	NA	NA	NA	depleted	depleted	NA	NA	NA	depleted	enriched	NA	NA	NA	NA	enriched	depleted	enriched	6	4
GRB14	depleted	NA	depleted	NA	enriched	depleted	NA	NA	NA	NA	NA	NA	NA	NA	enriched	NA	enriched	enriched	NA	enriched	enriched	depleted	6	4
HNRNPLL	enriched	enriched	enriched	depleted	NA	NA	NA	NA	NA	NA	NA	enriched	enriched	depleted	depleted	NA	enriched	depleted	NA	NA	NA	NA	6	4
IRS1	NA	NA	NA	enriched	enriched	enriched	NA	NA	NA	NA	NA	NA	depleted	depleted	depleted	NA	enriched	depleted	enriched	NA	NA	enriched	6	4
KAZN	NA	enriched	enriched	NA	NA	enriched	NA	depleted	depleted	NA	NA	NA	enriched	enriched	depleted	NA	NA	depleted	NA	NA	enriched	NA	6	4
KRT8	NA	depleted	depleted	NA	NA	NA	NA	NA	enriched	NA	enriched	NA	enriched	NA	enriched	NA	NA	enriched	NA	enriched	depleted	depleted	6	4
MAN1B1	NA	NA	enriched	NA	depleted	NA	enriched	depleted	NA	NA	NA	enriched	enriched	NA	enriched	NA	depleted	enriched	NA	NA	NA	depleted	6	4
MTHFD2L	enriched	NA	NA	depleted	NA	enriched	NA	NA	depleted	NA	NA	NA	NA	enriched	depleted	enriched	NA	NA	NA	depleted	enriched	enriched	6	4
NSA2	NA	NA	depleted	enriched	enriched	depleted	NA	depleted	enriched	enriched	NA	NA	NA	enriched	NA	NA	enriched	NA	NA	NA	NA	depleted	6	4
OBSL1	enriched	NA	enriched	depleted	NA	NA	NA	NA	NA	NA	depleted	NA	NA	depleted	depleted	enriched	NA	enriched	enriched	NA	NA	enriched	6	4
PCDH9	enriched	enriched	NA	NA	NA	NA	NA	NA	NA	enriched	NA	NA	depleted	depleted	enriched	NA	NA	depleted	NA	depleted	enriched	enriched	6	4
PRR5-ARHGAP8	depleted	NA	NA	depleted	NA	NA	NA	NA	enriched	enriched	NA	enriched	enriched	depleted	NA	NA	NA	enriched	NA	NA	enriched	depleted	6	4
STARD4	enriched	NA	NA	enriched	depleted	NA	NA	NA	depleted	NA	enriched	NA	enriched	NA	enriched	NA	depleted	enriched	depleted	NA	NA	NA	6	4
TAOK2	depleted	enriched	enriched	NA	depleted	NA	NA	enriched	NA	NA	NA	enriched	NA	enriched	depleted	NA	depleted	NA	NA	NA	NA	enriched	6	4
TEX9	NA	enriched	enriched	NA	NA	NA	NA	enriched	NA	NA	depleted	NA	NA	NA	NA	enriched	depleted	depleted	NA	enriched	depleted	enriched	6	4
TTLL11	NA	enriched	NA	depleted	enriched	NA	NA	NA	enriched	enriched	depleted	NA	NA	depleted	NA	NA	NA	NA	enriched	NA	enriched	depleted	6	4
TXNDC9	enriched	NA	NA	NA	enriched	NA	NA	depleted	NA	NA	NA	enriched	enriched	enriched	depleted	depleted	NA	NA	NA	NA	depleted	enriched	6	4
ZNF37A	enriched	NA	enriched	enriched	NA	enriched	NA	depleted	depleted	NA	NA	NA	NA	depleted	depleted	enriched	NA	enriched	NA	NA	NA	NA	6	4
ZNF599	NA	enriched	NA	depleted	NA	NA	NA	NA	depleted	NA	NA	NA	enriched	NA	depleted	enriched	enriched	NA	NA	depleted	enriched	enriched	6	4
ZNF665	NA	NA	enriched	depleted	NA	NA	enriched	depleted	NA	NA	NA	NA	enriched	enriched	depleted	enriched	NA	NA	enriched	NA	depleted	NA	6	4
AGBL4	NA	depleted	NA	NA	depleted	NA	NA	enriched	enriched	enriched	NA	enriched	NA	depleted	depleted	NA	depleted	NA	NA	enriched	enriched	NA	6	5
ATIC	NA	depleted	NA	enriched	NA	NA	depleted	NA	depleted	NA	enriched	enriched	enriched	NA	depleted	NA	enriched	NA	NA	depleted	enriched	NA	6	5
BCL10	enriched	depleted	enriched	NA	enriched	NA	NA	depleted	depleted	depleted	NA	NA	NA	enriched	enriched	NA	NA	enriched	NA	depleted	NA	NA	6	5
BCL11A	NA	NA	depleted	NA	enriched	NA	NA	NA	depleted	depleted	NA	NA	depleted	enriched	enriched	enriched	enriched	NA	enriched	NA	depleted	NA	6	5
COQ2	enriched	NA	NA	enriched	NA	NA	enriched	depleted	depleted	depleted	NA	NA	NA	enriched	enriched	NA	depleted	enriched	NA	depleted	NA	NA	6	5
DZIP1	NA	NA	NA	depleted	depleted	NA	enriched	enriched	enriched	enriched	enriched	depleted	NA	depleted	NA	NA	NA	NA	NA	depleted	NA	enriched	6	5
GNA12	NA	NA	enriched	NA	NA	NA	depleted	enriched	enriched	enriched	NA	NA	NA	depleted	depleted	NA	depleted	depleted	NA	NA	enriched	enriched	6	5
HSF2BP	NA	NA	depleted	depleted	NA	NA	NA	NA	enriched	enriched	depleted	NA	depleted	NA	depleted	enriched	enriched	enriched	NA	NA	NA	enriched	6	5
MAX	NA	enriched	enriched	NA	depleted	enriched	NA	NA	NA	NA	depleted	NA	NA	depleted	depleted	NA	NA	depleted	NA	enriched	enriched	enriched	6	5
MGAT1	enriched	NA	NA	enriched	enriched	depleted	NA	NA	depleted	NA	NA	enriched	enriched	depleted	depleted	NA	enriched	depleted	NA	NA	NA	NA	6	5
PXMP2	NA	NA	depleted	enriched	enriched	NA	depleted	NA	depleted	depleted	enriched	depleted	NA	NA	enriched	NA	enriched	NA	NA	NA	NA	enriched	6	5
RCC1	NA	NA	NA	enriched	enriched	NA	depleted	NA	NA	depleted	enriched	NA	depleted	depleted	enriched	enriched	enriched	depleted	NA	NA	NA	NA	6	5
SETD4	NA	NA	enriched	depleted	NA	NA	NA	enriched	NA	NA	depleted	enriched	enriched	depleted	depleted	NA	depleted	NA	NA	NA	enriched	enriched	6	5
SLC20A2	NA	depleted	depleted	enriched	enriched	NA	NA	NA	enriched	NA	enriched	NA	depleted	depleted	depleted	NA	enriched	enriched	NA	NA	NA	NA	6	5
ZNF394	NA	NA	enriched	depleted	NA	NA	NA	enriched	enriched	NA	depleted	NA	NA	enriched	depleted	NA	depleted	enriched	depleted	enriched	NA	NA	6	5
ZNF547	depleted	NA	enriched	depleted	NA	NA	NA	enriched	enriched	enriched	NA	NA	enriched	enriched	depleted	NA	depleted	NA	depleted	NA	NA	NA	6	5
ACOT11	NA	enriched	enriched	depleted	NA	enriched	NA	depleted	depleted	depleted	depleted	enriched	enriched	NA	NA	NA	depleted	NA	NA	NA	NA	enriched	6	6
C20orf196	enriched	enriched	enriched	depleted	NA	enriched	NA	NA	depleted	depleted	NA	NA	NA	enriched	depleted	NA	depleted	depleted	NA	NA	NA	enriched	6	6
CYHR1	NA	NA	enriched	enriched	enriched	depleted	NA	NA	enriched	NA	NA	depleted	depleted	enriched	depleted	NA	enriched	depleted	NA	NA	NA	depleted	6	6
ENTPD1	NA	enriched	depleted	NA	depleted	enriched	NA	NA	enriched	NA	NA	NA	depleted	NA	enriched	depleted	depleted	enriched	NA	enriched	depleted	NA	6	6
GCDH	depleted	depleted	depleted	enriched	enriched	NA	NA	NA	enriched	enriched	NA	NA	depleted	depleted	NA	NA	NA	enriched	depleted	NA	enriched	NA	6	6
HSPA14	NA	depleted	depleted	enriched	NA	depleted	enriched	depleted	depleted	NA	depleted	enriched	NA	enriched	enriched	NA	NA	enriched	NA	NA	NA	NA	6	6
OPA3	enriched	NA	NA	NA	enriched	depleted	NA	enriched	depleted	depleted	NA	NA	enriched	depleted	NA	NA	enriched	enriched	NA	depleted	depleted	NA	6	6
PFKP	NA	NA	NA	enriched	depleted	enriched	NA	NA	NA	depleted	NA	enriched	enriched	enriched	enriched	depleted	depleted	NA	NA	depleted	NA	depleted	6	6
PIGG	depleted	depleted	enriched	NA	enriched	depleted	NA	enriched	enriched	enriched	NA	NA	NA	NA	depleted	NA	NA	NA	NA	enriched	depleted	depleted	6	6
PIN4	enriched	enriched	enriched	depleted	NA	NA	NA	depleted	depleted	depleted	NA	NA	NA	NA	enriched	NA	NA	depleted	NA	depleted	enriched	enriched	6	6
ZDHHC6	NA	enriched	depleted	enriched	enriched	depleted	NA	NA	depleted	NA	NA	NA	enriched	depleted	enriched	NA	NA	depleted	NA	depleted	enriched	NA	6	6
DCLRE1C	NA	depleted	NA	enriched	depleted	NA	depleted	enriched	enriched	NA	NA	depleted	depleted	NA	enriched	depleted	NA	enriched	NA	enriched	depleted	NA	6	7
PANK2	NA	enriched	enriched	depleted	NA	enriched	NA	enriched	NA	NA	depleted	NA	enriched	NA	depleted	depleted	depleted	depleted	NA	depleted	enriched	NA	6	7
RNF157	NA	enriched	depleted	NA	enriched	depleted	NA	enriched	NA	NA	depleted	depleted	NA	enriched	depleted	depleted	NA	NA	depleted	enriched	enriched	NA	6	7
SLC25A51	depleted	NA	depleted	enriched	NA	NA	NA	enriched	enriched	enriched	depleted	depleted	depleted	NA	enriched	depleted	NA	enriched	NA	NA	NA	depleted	6	7
SLC27A4	NA	depleted	depleted	enriched	enriched	NA	NA	NA	enriched	enriched	NA	depleted	depleted	depleted	depleted	depleted	NA	NA	NA	enriched	enriched	NA	6	7
TKFC	NA	NA	NA	depleted	enriched	enriched	NA	depleted	depleted	depleted	depleted	NA	enriched	NA	depleted	NA	enriched	depleted	NA	enriched	NA	enriched	6	7
ORC3	enriched	enriched	depleted	depleted	depleted	enriched	NA	enriched	depleted	NA	NA	NA	NA	NA	NA	enriched	depleted	depleted	NA	depleted	depleted	enriched	6	8
CAMTA1	depleted	NA	enriched	depleted	depleted	enriched	NA	depleted	NA	depleted	NA	enriched	enriched	enriched	depleted	NA	depleted	depleted	NA	depleted	NA	enriched	6	9
CCDC157	enriched	NA	depleted	NA	NA	enriched	depleted	depleted	depleted	depleted	NA	NA	NA	enriched	enriched	depleted	depleted	depleted	NA	depleted	enriched	enriched	6	9
XPNPEP3	NA	depleted	enriched	enriched	depleted	enriched	NA	depleted	depleted	depleted	NA	depleted	depleted	NA	enriched	NA	depleted	enriched	NA	NA	enriched	depleted	6	9
ADAMTSL4	depleted	depleted	depleted	depleted	depleted	NA	NA	enriched	enriched	enriched	enriched	depleted	depleted	enriched	NA	depleted	depleted	depleted	NA	enriched	NA	depleted	6	11
KAZALD1	depleted	depleted	depleted	depleted	enriched	enriched	NA	enriched	depleted	depleted	depleted	enriched	NA	enriched	depleted	depleted	enriched	depleted	NA	depleted	depleted	depleted	6	13
ACRBP	NA	NA	enriched	enriched	NA	NA	NA	NA	NA	NA	NA	enriched	enriched	enriched	NA	NA	NA	NA	NA	NA	NA	NA	5	0
ARHGEF28	NA	NA	enriched	NA	NA	enriched	NA	NA	NA	NA	NA	NA	NA	enriched	NA	NA	NA	NA	NA	enriched	NA	enriched	5	0
BRWD1	NA	NA	enriched	NA	NA	enriched	NA	NA	NA	NA	NA	NA	NA	enriched	enriched	NA	NA	enriched	NA	NA	NA	NA	5	0
C2orf92	NA	enriched	enriched	NA	NA	enriched	NA	NA	NA	NA	NA	NA	enriched	NA	NA	NA	NA	NA	enriched	NA	NA	NA	5	0
CCDC82	NA	enriched	NA	NA	enriched	enriched	NA	NA	NA	NA	NA	enriched	NA	NA	NA	NA	NA	enriched	NA	NA	NA	NA	5	0
CORO2B	enriched	NA	enriched	NA	NA	NA	NA	NA	NA	NA	NA	NA	NA	enriched	NA	NA	enriched	NA	enriched	NA	NA	NA	5	0
DENND2D	NA	NA	enriched	NA	enriched	NA	NA	enriched	NA	NA	NA	NA	enriched	enriched	NA	NA	NA	NA	NA	NA	NA	NA	5	0
DNHD1	enriched	NA	NA	enriched	NA	NA	NA	enriched	NA	NA	NA	NA	NA	NA	enriched	NA	NA	NA	NA	NA	enriched	NA	5	0
DSE	enriched	NA	enriched	NA	NA	NA	NA	enriched	NA	NA	NA	NA	enriched	enriched	NA	NA	NA	NA	NA	NA	NA	NA	5	0
EFCAB2	NA	NA	enriched	enriched	NA	enriched	NA	NA	NA	NA	enriched	NA	NA	NA	NA	enriched	NA	NA	NA	NA	NA	NA	5	0
EFCC1	enriched	NA	NA	NA	enriched	NA	NA	NA	NA	NA	NA	enriched	enriched	NA	NA	NA	enriched	NA	NA	NA	NA	NA	5	0
ETFRF1	NA	NA	enriched	NA	NA	NA	NA	enriched	NA	NA	enriched	NA	NA	NA	enriched	enriched	NA	NA	NA	NA	NA	NA	5	0
FAAH2	enriched	NA	NA	NA	NA	NA	NA	NA	NA	enriched	NA	NA	enriched	enriched	NA	NA	NA	enriched	NA	NA	NA	NA	5	0
GAS2	enriched	NA	enriched	NA	NA	enriched	NA	NA	NA	NA	NA	NA	NA	enriched	NA	NA	NA	NA	NA	NA	NA	enriched	5	0
GRM7	enriched	enriched	enriched	NA	NA	NA	NA	NA	NA	NA	NA	NA	NA	NA	NA	NA	enriched	NA	NA	NA	enriched	NA	5	0
HMGCLL1	NA	enriched	NA	NA	NA	NA	NA	NA	NA	enriched	NA	enriched	enriched	enriched	NA	NA	NA	NA	NA	NA	NA	NA	5	0
ILDR1	enriched	NA	NA	NA	enriched	NA	NA	NA	NA	NA	NA	enriched	enriched	NA	NA	NA	enriched	NA	NA	NA	NA	NA	5	0
KCTD20	NA	NA	enriched	enriched	enriched	NA	NA	NA	NA	NA	NA	NA	enriched	enriched	NA	NA	NA	NA	NA	NA	NA	NA	5	0
KNTC1	NA	NA	NA	NA	NA	NA	NA	NA	NA	NA	NA	enriched	enriched	NA	enriched	NA	NA	enriched	NA	NA	NA	enriched	5	0
LRCH3	enriched	NA	NA	NA	enriched	NA	enriched	NA	NA	NA	NA	NA	enriched	NA	NA	NA	enriched	NA	NA	NA	NA	NA	5	0
LRPPRC	NA	NA	NA	enriched	enriched	NA	NA	NA	NA	NA	NA	enriched	enriched	NA	NA	NA	enriched	NA	NA	NA	NA	NA	5	0
2022-03-01	NA	enriched	NA	NA	NA	NA	NA	NA	NA	NA	enriched	enriched	enriched	NA	NA	NA	enriched	NA	NA	NA	NA	NA	5	0
MFSD13A	NA	NA	enriched	NA	enriched	enriched	NA	NA	NA	NA	NA	NA	NA	enriched	NA	NA	enriched	NA	NA	NA	NA	NA	5	0
MFSD2B	NA	NA	enriched	enriched	NA	NA	NA	NA	NA	NA	NA	enriched	enriched	NA	NA	NA	NA	enriched	NA	NA	NA	NA	5	0
NFKBID	enriched	enriched	enriched	NA	NA	NA	enriched	NA	NA	NA	NA	NA	enriched	NA	NA	NA	NA	NA	NA	NA	NA	NA	5	0
NMRAL1	NA	enriched	NA	enriched	NA	NA	enriched	NA	NA	enriched	NA	NA	enriched	NA	NA	NA	NA	NA	NA	NA	NA	NA	5	0
NOP56	enriched	NA	NA	NA	enriched	NA	NA	NA	NA	NA	NA	NA	enriched	enriched	NA	NA	enriched	NA	NA	NA	NA	NA	5	0
NUB1	NA	NA	NA	enriched	NA	NA	NA	NA	NA	NA	NA	NA	enriched	enriched	NA	NA	NA	enriched	NA	NA	NA	enriched	5	0
NUDT3	enriched	NA	enriched	NA	NA	NA	NA	NA	NA	NA	NA	NA	enriched	NA	NA	NA	NA	NA	NA	enriched	NA	enriched	5	0
PCDH10	NA	NA	NA	NA	NA	NA	NA	NA	NA	enriched	NA	NA	NA	NA	enriched	NA	NA	enriched	NA	NA	enriched	enriched	5	0
PIK3C3	enriched	NA	enriched	NA	NA	enriched	NA	NA	NA	NA	NA	NA	enriched	NA	NA	NA	NA	NA	NA	NA	NA	enriched	5	0
PLEKHG4B	NA	enriched	enriched	NA	NA	NA	NA	NA	NA	NA	NA	NA	enriched	NA	NA	NA	NA	NA	NA	enriched	NA	enriched	5	0
PPFIBP2	enriched	enriched	enriched	NA	NA	NA	NA	enriched	NA	NA	NA	NA	NA	NA	NA	NA	NA	NA	NA	NA	NA	enriched	5	0
RADIL	enriched	NA	NA	NA	enriched	NA	NA	NA	NA	enriched	NA	NA	NA	NA	NA	NA	enriched	NA	NA	NA	enriched	NA	5	0
REEP5	enriched	NA	NA	NA	NA	NA	NA	NA	NA	NA	NA	NA	enriched	NA	NA	NA	NA	enriched	NA	NA	enriched	enriched	5	0
RFX2	NA	NA	enriched	NA	enriched	NA	NA	enriched	NA	NA	NA	enriched	NA	NA	NA	NA	NA	NA	NA	NA	NA	enriched	5	0
RPS27L	NA	NA	enriched	enriched	NA	NA	NA	NA	NA	NA	NA	enriched	NA	NA	NA	NA	enriched	enriched	NA	NA	NA	NA	5	0
SCARA3	enriched	NA	enriched	NA	NA	NA	NA	NA	NA	NA	NA	NA	NA	enriched	enriched	NA	NA	NA	NA	NA	enriched	NA	5	0
SFXN1	NA	NA	NA	NA	enriched	NA	NA	NA	NA	NA	enriched	NA	NA	NA	enriched	NA	enriched	enriched	NA	NA	NA	NA	5	0
SLC37A1	NA	NA	enriched	NA	enriched	NA	enriched	NA	NA	NA	NA	NA	NA	NA	enriched	NA	NA	NA	enriched	NA	NA	NA	5	0
STAC	enriched	NA	enriched	NA	NA	NA	NA	NA	NA	NA	NA	enriched	enriched	NA	NA	NA	NA	NA	enriched	NA	NA	NA	5	0
SUCLA2	enriched	NA	enriched	NA	NA	NA	NA	NA	NA	NA	NA	NA	NA	NA	NA	NA	NA	enriched	NA	NA	enriched	enriched	5	0
TAPBPL	NA	NA	enriched	enriched	enriched	NA	NA	enriched	NA	NA	NA	NA	NA	NA	NA	NA	enriched	NA	NA	NA	NA	NA	5	0
THNSL2	enriched	NA	NA	enriched	enriched	NA	NA	NA	NA	NA	NA	NA	enriched	NA	NA	NA	enriched	NA	NA	NA	NA	NA	5	0
TMLHE	enriched	NA	NA	enriched	NA	NA	NA	NA	NA	enriched	NA	NA	NA	NA	NA	NA	NA	NA	enriched	NA	enriched	NA	5	0
TMOD2	NA	enriched	enriched	NA	NA	NA	NA	NA	NA	NA	NA	enriched	enriched	NA	NA	NA	NA	enriched	NA	NA	NA	NA	5	0
UST	enriched	NA	enriched	NA	NA	enriched	NA	NA	NA	NA	NA	NA	enriched	NA	NA	NA	NA	NA	NA	enriched	NA	NA	5	0
VPS50	NA	NA	NA	NA	enriched	NA	enriched	NA	NA	NA	NA	NA	enriched	NA	NA	NA	NA	enriched	NA	NA	enriched	NA	5	0
ZBTB20	enriched	NA	enriched	NA	NA	NA	NA	NA	NA	NA	NA	NA	enriched	NA	NA	NA	NA	NA	NA	NA	enriched	enriched	5	0
ZFR2	NA	NA	enriched	NA	NA	NA	NA	NA	NA	NA	NA	enriched	enriched	NA	enriched	NA	NA	NA	NA	NA	enriched	NA	5	0
ZNF43	enriched	NA	enriched	NA	NA	NA	NA	NA	NA	NA	NA	NA	NA	NA	NA	NA	enriched	NA	NA	NA	enriched	enriched	5	0
ZNF493	NA	NA	enriched	enriched	NA	NA	NA	NA	NA	NA	NA	NA	enriched	NA	enriched	NA	enriched	NA	NA	NA	NA	NA	5	0
ZNF652	NA	NA	enriched	NA	NA	NA	enriched	NA	NA	NA	NA	NA	enriched	NA	enriched	NA	enriched	NA	NA	NA	NA	NA	5	0
ABCC3	NA	NA	NA	NA	enriched	NA	NA	NA	NA	NA	NA	enriched	depleted	enriched	NA	NA	enriched	NA	NA	enriched	NA	NA	5	1
ADCY1	NA	enriched	NA	NA	NA	NA	NA	NA	NA	NA	NA	NA	enriched	NA	NA	NA	NA	depleted	NA	enriched	enriched	enriched	5	1
AHRR	NA	NA	NA	NA	enriched	NA	NA	NA	NA	NA	NA	enriched	enriched	enriched	NA	NA	enriched	depleted	NA	NA	NA	NA	5	1
ANKRD46	NA	NA	NA	NA	NA	NA	NA	enriched	NA	NA	NA	enriched	enriched	enriched	depleted	NA	NA	enriched	NA	NA	NA	NA	5	1
B4GALT2	NA	NA	enriched	enriched	enriched	NA	NA	enriched	NA	NA	NA	NA	NA	depleted	NA	NA	enriched	NA	NA	NA	NA	NA	5	1
BBS1	enriched	NA	enriched	NA	NA	NA	NA	NA	NA	NA	enriched	NA	enriched	NA	depleted	NA	NA	enriched	NA	NA	NA	NA	5	1
CBX5	NA	NA	enriched	NA	NA	NA	NA	NA	NA	NA	NA	enriched	enriched	enriched	depleted	NA	NA	NA	NA	NA	NA	enriched	5	1
CD163L1	enriched	enriched	NA	enriched	enriched	NA	NA	NA	depleted	NA	NA	NA	NA	NA	NA	NA	enriched	NA	NA	NA	NA	NA	5	1
CGNL1	NA	NA	enriched	NA	NA	NA	NA	NA	NA	NA	enriched	NA	enriched	depleted	NA	enriched	NA	NA	enriched	NA	NA	NA	5	1
CLCN6	enriched	NA	enriched	NA	NA	NA	NA	NA	NA	NA	NA	NA	NA	depleted	NA	NA	enriched	enriched	enriched	NA	NA	NA	5	1
CSNK1A1	enriched	NA	NA	enriched	NA	NA	NA	NA	NA	NA	NA	NA	NA	NA	depleted	NA	enriched	NA	enriched	NA	NA	enriched	5	1
CYB5R4	enriched	NA	NA	NA	NA	NA	NA	enriched	NA	NA	NA	NA	enriched	NA	NA	NA	enriched	NA	enriched	NA	depleted	NA	5	1
DDX31	enriched	NA	enriched	NA	NA	NA	NA	enriched	NA	NA	NA	NA	enriched	NA	NA	NA	NA	depleted	NA	enriched	NA	NA	5	1
ETV5	enriched	enriched	enriched	NA	NA	NA	NA	NA	NA	NA	NA	enriched	enriched	NA	NA	NA	NA	depleted	NA	NA	NA	NA	5	1
F8	NA	NA	NA	enriched	NA	depleted	NA	enriched	NA	NA	enriched	NA	NA	NA	NA	NA	enriched	NA	NA	NA	NA	enriched	5	1
FHIT	NA	enriched	NA	depleted	NA	enriched	enriched	NA	NA	NA	NA	NA	NA	enriched	NA	NA	NA	NA	enriched	NA	NA	NA	5	1
FOXN3	NA	NA	enriched	depleted	NA	NA	NA	NA	NA	NA	NA	NA	NA	enriched	enriched	NA	NA	enriched	NA	NA	NA	enriched	5	1
GK5	NA	NA	enriched	NA	NA	enriched	NA	NA	NA	NA	NA	enriched	enriched	depleted	enriched	NA	NA	NA	NA	NA	NA	NA	5	1
GPC5	NA	NA	NA	enriched	NA	NA	NA	NA	NA	NA	NA	enriched	enriched	NA	depleted	NA	NA	NA	enriched	enriched	NA	NA	5	1
H2AFY	NA	NA	NA	enriched	enriched	NA	NA	enriched	NA	enriched	NA	NA	NA	NA	NA	NA	enriched	depleted	NA	NA	NA	NA	5	1
HAT1	enriched	NA	enriched	NA	NA	NA	enriched	NA	NA	NA	NA	NA	enriched	NA	NA	NA	NA	enriched	NA	depleted	NA	NA	5	1
JMY	NA	NA	enriched	NA	NA	NA	NA	NA	NA	NA	NA	NA	NA	enriched	enriched	NA	NA	enriched	NA	depleted	NA	enriched	5	1
KATNAL2	enriched	NA	NA	depleted	NA	NA	enriched	NA	NA	enriched	NA	NA	enriched	NA	NA	NA	NA	NA	NA	enriched	NA	NA	5	1
KMT2E	enriched	NA	NA	NA	NA	NA	NA	NA	NA	NA	NA	NA	NA	enriched	NA	NA	NA	depleted	enriched	enriched	NA	enriched	5	1
LCAT	enriched	NA	enriched	NA	NA	NA	NA	NA	NA	NA	enriched	enriched	enriched	NA	NA	NA	NA	NA	NA	NA	depleted	NA	5	1
LLGL2	NA	NA	enriched	depleted	NA	NA	NA	enriched	NA	NA	NA	enriched	enriched	enriched	NA	NA	NA	NA	NA	NA	NA	NA	5	1
2022-03-06	enriched	NA	NA	NA	NA	NA	NA	depleted	NA	NA	NA	enriched	enriched	NA	enriched	NA	NA	enriched	NA	NA	NA	NA	5	1
MATR3	enriched	NA	NA	NA	enriched	NA	NA	NA	NA	NA	NA	NA	enriched	depleted	NA	enriched	enriched	NA	NA	NA	NA	NA	5	1
MCPH1	enriched	NA	NA	NA	NA	enriched	NA	NA	NA	NA	NA	NA	NA	enriched	enriched	depleted	NA	enriched	NA	NA	NA	NA	5	1
MTMR1	enriched	NA	NA	NA	NA	NA	enriched	NA	NA	depleted	NA	NA	enriched	NA	enriched	NA	NA	enriched	NA	NA	NA	NA	5	1
MXD4	enriched	enriched	enriched	enriched	NA	NA	NA	NA	depleted	NA	NA	NA	NA	enriched	NA	NA	NA	NA	NA	NA	NA	NA	5	1
PAXBP1	NA	NA	enriched	NA	NA	NA	enriched	enriched	NA	NA	NA	NA	enriched	NA	NA	NA	NA	enriched	NA	NA	depleted	NA	5	1
PDHA1	NA	NA	NA	enriched	NA	depleted	NA	NA	enriched	NA	NA	NA	NA	enriched	NA	NA	enriched	enriched	NA	NA	NA	NA	5	1
PGM3	NA	enriched	enriched	NA	NA	NA	NA	NA	NA	NA	NA	enriched	enriched	enriched	NA	NA	NA	NA	NA	NA	depleted	NA	5	1
PRH1-TAS2R14	NA	NA	enriched	NA	NA	depleted	NA	NA	enriched	enriched	NA	NA	NA	NA	NA	enriched	NA	NA	NA	NA	NA	enriched	5	1
PWWP2A	NA	NA	enriched	NA	NA	NA	NA	enriched	NA	NA	NA	NA	NA	enriched	depleted	enriched	NA	NA	NA	NA	NA	enriched	5	1
RABEP2	NA	NA	enriched	NA	NA	NA	enriched	NA	NA	NA	NA	NA	NA	enriched	enriched	NA	enriched	NA	NA	NA	depleted	NA	5	1
RAD9B	NA	NA	enriched	NA	NA	NA	NA	enriched	NA	enriched	NA	NA	NA	NA	NA	enriched	NA	depleted	NA	NA	NA	enriched	5	1
RARS2	NA	NA	NA	NA	enriched	NA	NA	NA	NA	NA	NA	enriched	enriched	NA	depleted	NA	enriched	NA	NA	NA	NA	enriched	5	1
RBM43	NA	NA	enriched	NA	NA	NA	NA	enriched	NA	NA	NA	NA	NA	enriched	depleted	enriched	NA	NA	NA	NA	enriched	NA	5	1
RPS6KB1	NA	NA	enriched	enriched	NA	NA	NA	NA	NA	NA	enriched	NA	enriched	NA	enriched	NA	NA	NA	depleted	NA	NA	NA	5	1
SCLY	enriched	NA	NA	enriched	NA	NA	NA	enriched	NA	NA	NA	enriched	NA	NA	NA	NA	NA	enriched	NA	NA	depleted	NA	5	1
SDHA	NA	NA	NA	depleted	enriched	NA	NA	enriched	NA	NA	NA	NA	enriched	NA	NA	NA	NA	enriched	NA	NA	enriched	NA	5	1
SERINC5	enriched	NA	enriched	NA	NA	enriched	NA	NA	NA	NA	NA	NA	enriched	enriched	depleted	NA	NA	NA	NA	NA	NA	NA	5	1
SHISA6	enriched	NA	NA	NA	NA	NA	NA	NA	NA	NA	NA	NA	enriched	enriched	NA	NA	enriched	depleted	NA	NA	NA	enriched	5	1
SLC25A24	enriched	NA	enriched	NA	NA	NA	NA	depleted	NA	NA	NA	NA	NA	NA	enriched	enriched	NA	enriched	NA	NA	NA	NA	5	1
SLC39A8	NA	NA	enriched	NA	NA	NA	NA	enriched	NA	NA	NA	enriched	enriched	NA	NA	NA	depleted	NA	NA	NA	enriched	NA	5	1
ST8SIA1	enriched	NA	NA	NA	NA	NA	NA	NA	NA	NA	NA	NA	enriched	depleted	enriched	NA	NA	NA	enriched	NA	NA	enriched	5	1
STON1-GTF2A1L	NA	NA	NA	NA	NA	enriched	NA	NA	NA	depleted	NA	NA	NA	enriched	NA	enriched	NA	enriched	NA	enriched	NA	NA	5	1
TAF5L	depleted	NA	enriched	NA	enriched	NA	NA	enriched	NA	enriched	NA	NA	NA	NA	NA	NA	NA	NA	NA	NA	NA	enriched	5	1
TBC1D19	NA	NA	enriched	NA	NA	NA	NA	depleted	NA	NA	NA	enriched	enriched	enriched	NA	NA	NA	NA	NA	NA	NA	enriched	5	1
TMTC4	NA	NA	depleted	enriched	enriched	enriched	enriched	NA	NA	NA	NA	NA	NA	NA	NA	NA	NA	enriched	NA	NA	NA	NA	5	1
TRIM14	NA	NA	NA	NA	NA	enriched	enriched	depleted	enriched	NA	NA	NA	NA	enriched	enriched	NA	NA	NA	NA	NA	NA	NA	5	1
TSPEAR	NA	enriched	enriched	NA	enriched	NA	NA	NA	NA	enriched	NA	NA	enriched	NA	NA	NA	NA	NA	NA	NA	depleted	NA	5	1
ZHX1	NA	enriched	enriched	enriched	NA	NA	NA	NA	NA	NA	NA	enriched	NA	NA	depleted	NA	NA	NA	NA	NA	NA	enriched	5	1
ZNF251	enriched	NA	NA	NA	NA	enriched	NA	enriched	NA	NA	NA	NA	enriched	NA	depleted	enriched	NA	NA	NA	NA	NA	NA	5	1
ZNF254	enriched	NA	enriched	NA	enriched	NA	enriched	NA	NA	NA	NA	NA	NA	NA	NA	NA	NA	depleted	NA	NA	enriched	NA	5	1
ZNF454	enriched	NA	enriched	NA	NA	NA	NA	NA	NA	enriched	NA	NA	enriched	NA	depleted	NA	NA	NA	NA	NA	enriched	NA	5	1
ABHD18	NA	NA	NA	enriched	NA	NA	NA	NA	depleted	NA	enriched	NA	NA	NA	NA	NA	NA	depleted	enriched	enriched	NA	enriched	5	2
ANKRD13C	NA	NA	enriched	NA	NA	enriched	NA	depleted	depleted	NA	NA	NA	enriched	enriched	NA	NA	NA	NA	NA	NA	NA	enriched	5	2
C11orf70	enriched	NA	NA	NA	NA	NA	NA	enriched	NA	NA	NA	enriched	enriched	NA	depleted	NA	NA	depleted	NA	NA	NA	enriched	5	2
C8orf88	NA	NA	enriched	NA	NA	NA	NA	enriched	NA	NA	NA	enriched	enriched	NA	depleted	NA	NA	enriched	depleted	NA	NA	NA	5	2
CCDC125	NA	NA	NA	NA	enriched	NA	enriched	NA	NA	NA	NA	enriched	enriched	NA	NA	NA	depleted	enriched	NA	depleted	NA	NA	5	2
CEP89	enriched	NA	NA	enriched	NA	NA	enriched	NA	NA	NA	enriched	NA	NA	NA	depleted	NA	depleted	enriched	NA	NA	NA	NA	5	2
CLEC16A	enriched	NA	NA	NA	enriched	NA	NA	depleted	NA	NA	depleted	NA	enriched	NA	enriched	NA	NA	NA	NA	NA	enriched	NA	5	2
CNOT1	NA	NA	enriched	depleted	NA	enriched	NA	NA	NA	NA	NA	enriched	enriched	depleted	NA	NA	NA	NA	NA	NA	NA	enriched	5	2
CRACR2A	NA	enriched	NA	NA	enriched	NA	enriched	NA	NA	NA	NA	NA	enriched	depleted	NA	NA	enriched	depleted	NA	NA	NA	NA	5	2
CREB3L2	enriched	enriched	enriched	NA	NA	NA	NA	enriched	NA	NA	NA	NA	NA	depleted	depleted	NA	NA	NA	NA	NA	NA	enriched	5	2
DGCR6	NA	depleted	NA	NA	NA	NA	NA	NA	NA	enriched	enriched	enriched	NA	NA	enriched	NA	NA	enriched	NA	NA	depleted	NA	5	2
DNAAF4	NA	NA	enriched	NA	NA	enriched	NA	enriched	NA	NA	NA	NA	NA	depleted	NA	NA	depleted	enriched	NA	enriched	NA	NA	5	2
DNAH5	enriched	NA	NA	depleted	NA	NA	NA	enriched	NA	NA	depleted	enriched	enriched	enriched	NA	NA	NA	NA	NA	NA	NA	NA	5	2
DNAJB6	NA	NA	enriched	NA	NA	NA	enriched	NA	depleted	NA	depleted	NA	NA	enriched	enriched	NA	NA	NA	NA	enriched	NA	NA	5	2
DTWD1	enriched	NA	depleted	enriched	NA	enriched	enriched	NA	depleted	NA	NA	NA	NA	enriched	NA	NA	NA	NA	NA	NA	NA	NA	5	2
EEF1E1	NA	enriched	enriched	NA	NA	NA	NA	NA	depleted	NA	NA	enriched	enriched	NA	depleted	NA	NA	NA	NA	NA	enriched	NA	5	2
ELOVL5	NA	NA	enriched	enriched	enriched	NA	NA	depleted	NA	NA	NA	enriched	NA	NA	NA	NA	NA	depleted	NA	NA	enriched	NA	5	2
EPB41L4B	NA	enriched	enriched	NA	NA	NA	NA	NA	NA	enriched	NA	NA	NA	NA	depleted	NA	enriched	depleted	enriched	NA	NA	NA	5	2
ERI1	NA	NA	NA	NA	NA	enriched	NA	NA	NA	enriched	NA	NA	NA	enriched	enriched	NA	depleted	enriched	NA	NA	depleted	NA	5	2
ERICH2	NA	NA	NA	enriched	NA	NA	NA	enriched	depleted	depleted	enriched	NA	NA	enriched	NA	NA	NA	NA	NA	NA	NA	enriched	5	2
EVA1C	enriched	NA	depleted	NA	NA	NA	NA	enriched	NA	enriched	NA	NA	NA	enriched	depleted	NA	enriched	NA	NA	NA	NA	NA	5	2
FAM13A	NA	enriched	NA	NA	NA	NA	NA	NA	NA	NA	NA	NA	NA	enriched	enriched	enriched	NA	enriched	NA	depleted	depleted	NA	5	2
FAM173B	NA	NA	enriched	NA	NA	NA	NA	NA	NA	NA	NA	NA	NA	enriched	depleted	NA	NA	NA	depleted	enriched	enriched	enriched	5	2
GALK2	NA	enriched	enriched	NA	NA	enriched	NA	NA	NA	NA	NA	NA	NA	depleted	NA	NA	NA	depleted	enriched	NA	NA	enriched	5	2
GPATCH2L	NA	enriched	enriched	depleted	NA	enriched	NA	NA	NA	NA	NA	NA	NA	enriched	depleted	NA	NA	NA	NA	NA	NA	enriched	5	2
GPM6B	NA	NA	enriched	NA	NA	NA	enriched	NA	NA	NA	NA	enriched	enriched	NA	depleted	depleted	NA	enriched	NA	NA	NA	NA	5	2
HYDIN	NA	NA	depleted	NA	NA	NA	NA	enriched	NA	NA	NA	enriched	enriched	NA	NA	NA	NA	enriched	depleted	enriched	NA	NA	5	2
IL18R1	enriched	NA	enriched	NA	NA	NA	NA	NA	depleted	NA	enriched	NA	NA	enriched	enriched	NA	NA	depleted	NA	NA	NA	NA	5	2
KCNRG	NA	NA	depleted	enriched	depleted	NA	NA	NA	NA	NA	NA	enriched	enriched	enriched	NA	NA	NA	enriched	NA	NA	NA	NA	5	2
KCTD3	enriched	NA	NA	NA	NA	NA	enriched	depleted	NA	depleted	NA	NA	enriched	NA	enriched	NA	NA	enriched	NA	NA	NA	NA	5	2
KIN	NA	enriched	enriched	enriched	NA	enriched	NA	NA	NA	NA	enriched	NA	NA	NA	NA	NA	depleted	depleted	NA	NA	NA	NA	5	2
KIZ	NA	NA	enriched	NA	enriched	NA	depleted	enriched	NA	NA	NA	enriched	depleted	NA	NA	NA	NA	enriched	NA	NA	NA	NA	5	2
LACTB	NA	NA	NA	enriched	NA	NA	NA	NA	depleted	depleted	NA	enriched	NA	enriched	enriched	NA	NA	enriched	NA	NA	NA	NA	5	2
LANCL2	enriched	NA	enriched	NA	enriched	NA	NA	depleted	depleted	NA	NA	NA	NA	NA	NA	NA	NA	enriched	NA	NA	enriched	NA	5	2
LCA5L	NA	enriched	depleted	NA	NA	NA	NA	NA	NA	enriched	NA	enriched	NA	depleted	NA	NA	NA	NA	enriched	NA	NA	enriched	5	2
MKNK1	NA	NA	enriched	NA	NA	NA	enriched	enriched	NA	depleted	NA	NA	NA	enriched	enriched	NA	NA	NA	depleted	NA	NA	NA	5	2
MPHOSPH8	NA	NA	enriched	enriched	enriched	NA	enriched	NA	NA	NA	NA	NA	NA	enriched	depleted	NA	NA	NA	NA	NA	depleted	NA	5	2
MTIF2	enriched	NA	enriched	NA	NA	NA	NA	NA	NA	depleted	NA	NA	enriched	NA	enriched	NA	NA	enriched	NA	depleted	NA	NA	5	2
MTSS1	NA	NA	enriched	enriched	enriched	enriched	NA	depleted	NA	NA	NA	NA	enriched	NA	depleted	NA	NA	NA	NA	NA	NA	NA	5	2
MYO5A	enriched	NA	depleted	NA	NA	NA	enriched	NA	NA	NA	NA	enriched	enriched	NA	NA	NA	NA	enriched	NA	depleted	NA	NA	5	2
NDUFAF5	NA	NA	NA	NA	NA	NA	NA	enriched	depleted	NA	NA	enriched	NA	enriched	depleted	enriched	NA	enriched	NA	NA	NA	NA	5	2
NNT	enriched	NA	enriched	NA	NA	NA	enriched	NA	depleted	NA	NA	NA	NA	NA	enriched	NA	NA	enriched	NA	NA	depleted	NA	5	2
NOTCH2	NA	NA	enriched	depleted	NA	NA	NA	enriched	NA	NA	NA	NA	NA	NA	enriched	NA	NA	depleted	NA	NA	enriched	enriched	5	2
NUDT6	NA	enriched	NA	NA	NA	NA	NA	NA	NA	NA	NA	NA	enriched	enriched	depleted	NA	enriched	depleted	NA	NA	enriched	NA	5	2
PDE1A	NA	NA	enriched	enriched	NA	NA	NA	NA	enriched	enriched	NA	NA	NA	NA	depleted	NA	enriched	depleted	NA	NA	NA	NA	5	2
PGBD3	NA	enriched	enriched	enriched	NA	NA	NA	enriched	NA	NA	NA	NA	depleted	enriched	depleted	NA	NA	NA	NA	NA	NA	NA	5	2
PHF12	NA	NA	enriched	enriched	NA	NA	enriched	NA	NA	NA	NA	NA	NA	enriched	depleted	NA	enriched	NA	NA	NA	depleted	NA	5	2
PPA2	enriched	NA	depleted	NA	enriched	NA	NA	NA	NA	NA	NA	NA	NA	NA	enriched	enriched	enriched	NA	NA	depleted	NA	NA	5	2
PPM1A	NA	NA	depleted	NA	enriched	NA	enriched	NA	NA	NA	NA	NA	enriched	enriched	depleted	NA	NA	enriched	NA	NA	NA	NA	5	2
RAB5B	NA	NA	NA	NA	enriched	NA	enriched	NA	NA	NA	NA	enriched	NA	NA	depleted	NA	enriched	NA	NA	NA	depleted	enriched	5	2
RASGRF2	depleted	enriched	NA	NA	NA	enriched	NA	depleted	NA	NA	NA	enriched	NA	NA	NA	NA	enriched	enriched	NA	NA	NA	NA	5	2
RELL1	NA	NA	NA	enriched	NA	NA	enriched	depleted	enriched	enriched	NA	NA	NA	depleted	NA	NA	NA	enriched	NA	NA	NA	NA	5	2
RPL31	NA	NA	enriched	NA	NA	NA	NA	NA	enriched	NA	NA	enriched	NA	NA	depleted	NA	NA	NA	depleted	enriched	enriched	NA	5	2
SLC6A6	NA	NA	enriched	NA	depleted	NA	NA	enriched	NA	NA	NA	NA	NA	depleted	enriched	NA	NA	enriched	NA	NA	NA	enriched	5	2
SLC9C1	NA	NA	enriched	NA	NA	enriched	NA	depleted	NA	NA	NA	enriched	enriched	NA	NA	depleted	NA	NA	NA	enriched	NA	NA	5	2
SNRNP35	NA	enriched	enriched	depleted	NA	NA	depleted	NA	NA	NA	NA	enriched	NA	NA	NA	NA	NA	NA	NA	enriched	NA	enriched	5	2
STX3	NA	NA	NA	enriched	enriched	NA	enriched	NA	NA	NA	NA	NA	NA	depleted	enriched	NA	enriched	depleted	NA	NA	NA	NA	5	2
STXBP1	enriched	NA	enriched	NA	NA	enriched	NA	NA	NA	NA	NA	NA	enriched	depleted	depleted	NA	NA	NA	NA	NA	NA	enriched	5	2
STXBP4	enriched	NA	NA	NA	NA	NA	NA	NA	NA	NA	NA	NA	enriched	depleted	NA	enriched	NA	depleted	NA	NA	enriched	enriched	5	2
TAF8	enriched	NA	NA	enriched	enriched	NA	NA	NA	NA	depleted	enriched	NA	NA	NA	NA	NA	NA	depleted	NA	NA	NA	enriched	5	2
TBCE	enriched	NA	NA	depleted	depleted	enriched	NA	NA	enriched	enriched	NA	NA	NA	NA	enriched	NA	NA	NA	NA	NA	NA	NA	5	2
TERF2	enriched	NA	enriched	NA	NA	NA	enriched	NA	depleted	NA	NA	NA	NA	enriched	depleted	NA	NA	enriched	NA	NA	NA	NA	5	2
TIA1	enriched	NA	enriched	NA	NA	depleted	NA	NA	NA	NA	NA	NA	NA	NA	NA	enriched	NA	enriched	enriched	NA	depleted	NA	5	2
TMCO3	NA	NA	NA	depleted	NA	NA	NA	enriched	NA	NA	NA	NA	NA	enriched	enriched	NA	enriched	enriched	NA	NA	depleted	NA	5	2
TMPRSS13	depleted	enriched	enriched	NA	enriched	NA	NA	enriched	NA	NA	NA	NA	NA	NA	NA	NA	NA	NA	NA	enriched	NA	depleted	5	2
TMPRSS3	NA	enriched	NA	NA	NA	NA	NA	enriched	depleted	NA	enriched	NA	NA	enriched	NA	NA	depleted	NA	NA	enriched	NA	NA	5	2
TMTC2	NA	NA	enriched	depleted	enriched	NA	NA	NA	depleted	NA	NA	NA	enriched	NA	NA	NA	NA	enriched	NA	NA	NA	enriched	5	2
UBE2D4	enriched	NA	enriched	enriched	enriched	NA	NA	NA	NA	NA	NA	NA	NA	NA	depleted	NA	NA	depleted	NA	NA	NA	enriched	5	2
USP34	NA	NA	enriched	NA	NA	NA	enriched	NA	NA	NA	NA	NA	enriched	depleted	enriched	NA	NA	depleted	NA	enriched	NA	NA	5	2
USP45	enriched	NA	enriched	NA	NA	NA	NA	NA	depleted	NA	NA	enriched	enriched	NA	depleted	NA	NA	NA	NA	NA	NA	enriched	5	2
WRB	depleted	NA	NA	NA	NA	NA	NA	enriched	enriched	NA	NA	NA	NA	enriched	enriched	NA	NA	NA	NA	enriched	NA	depleted	5	2
ZFP64	NA	NA	NA	NA	NA	enriched	depleted	NA	enriched	enriched	NA	NA	depleted	NA	NA	NA	NA	enriched	enriched	NA	NA	NA	5	2
ZFYVE26	enriched	NA	depleted	enriched	NA	enriched	NA	enriched	NA	NA	NA	NA	enriched	NA	NA	NA	NA	depleted	NA	NA	NA	NA	5	2
ANKEF1	NA	NA	depleted	enriched	NA	enriched	enriched	NA	depleted	NA	NA	NA	NA	enriched	depleted	NA	NA	NA	NA	enriched	NA	NA	5	3
BBOF1	NA	enriched	enriched	depleted	NA	NA	NA	NA	enriched	enriched	NA	NA	NA	NA	NA	depleted	NA	depleted	NA	NA	NA	enriched	5	3
BROX	enriched	NA	enriched	NA	NA	depleted	NA	NA	NA	NA	NA	NA	enriched	depleted	depleted	NA	NA	enriched	NA	NA	NA	enriched	5	3
CCAR1	enriched	NA	enriched	enriched	NA	depleted	NA	NA	NA	depleted	NA	NA	NA	NA	enriched	NA	enriched	NA	NA	NA	depleted	NA	5	3
CEP95	enriched	NA	enriched	NA	NA	depleted	NA	NA	depleted	NA	NA	NA	enriched	enriched	NA	NA	depleted	enriched	NA	NA	NA	NA	5	3
DCAF7	enriched	NA	NA	depleted	enriched	NA	NA	NA	NA	NA	NA	enriched	enriched	NA	depleted	NA	depleted	NA	NA	NA	NA	enriched	5	3
DENND1B	NA	NA	NA	depleted	NA	enriched	NA	NA	NA	enriched	NA	enriched	enriched	depleted	NA	depleted	NA	enriched	NA	NA	NA	NA	5	3
EFCAB13	NA	NA	enriched	depleted	enriched	NA	NA	enriched	NA	NA	NA	NA	NA	depleted	depleted	NA	enriched	enriched	NA	NA	NA	NA	5	3
ENKUR	NA	depleted	depleted	NA	enriched	NA	NA	enriched	NA	NA	NA	NA	enriched	depleted	NA	NA	enriched	NA	NA	enriched	NA	NA	5	3
ETV7	enriched	NA	NA	enriched	NA	NA	enriched	enriched	NA	enriched	NA	NA	NA	depleted	depleted	NA	NA	NA	NA	NA	depleted	NA	5	3
GAMT	NA	NA	NA	depleted	NA	NA	NA	depleted	enriched	NA	NA	enriched	enriched	depleted	enriched	NA	NA	NA	NA	enriched	NA	NA	5	3
GUCY1A2	NA	NA	NA	enriched	NA	depleted	NA	NA	NA	enriched	enriched	NA	NA	enriched	NA	NA	NA	depleted	depleted	NA	enriched	NA	5	3
HIPK2	NA	NA	enriched	NA	NA	enriched	NA	NA	enriched	NA	depleted	NA	NA	NA	depleted	NA	NA	depleted	NA	enriched	enriched	NA	5	3
HSF1	NA	NA	enriched	enriched	NA	NA	enriched	depleted	depleted	NA	NA	NA	enriched	NA	NA	NA	NA	NA	enriched	depleted	NA	NA	5	3
ISY1-RAB43	NA	NA	enriched	enriched	NA	NA	NA	depleted	NA	enriched	NA	NA	enriched	NA	enriched	depleted	NA	depleted	NA	NA	NA	NA	5	3
KIF2A	NA	NA	enriched	NA	NA	NA	NA	depleted	NA	NA	NA	enriched	enriched	NA	enriched	NA	depleted	enriched	NA	depleted	NA	NA	5	3
LIMCH1	NA	NA	NA	NA	enriched	NA	NA	depleted	NA	depleted	NA	NA	enriched	NA	enriched	NA	NA	enriched	NA	NA	depleted	enriched	5	3
LRRC23	NA	NA	enriched	NA	enriched	enriched	NA	enriched	depleted	depleted	NA	enriched	NA	depleted	NA	NA	NA	NA	NA	NA	NA	NA	5	3
MAP3K13	NA	NA	NA	enriched	NA	NA	enriched	NA	depleted	NA	NA	NA	enriched	NA	enriched	NA	NA	enriched	depleted	depleted	NA	NA	5	3
MARVELD3	NA	NA	NA	depleted	NA	enriched	NA	enriched	enriched	NA	NA	NA	enriched	NA	depleted	NA	NA	enriched	NA	NA	depleted	NA	5	3
MON2	NA	NA	enriched	NA	NA	NA	NA	depleted	NA	depleted	NA	NA	enriched	enriched	enriched	NA	depleted	enriched	NA	NA	NA	NA	5	3
MPND	enriched	NA	enriched	depleted	enriched	depleted	enriched	NA	NA	NA	NA	NA	NA	NA	NA	NA	enriched	depleted	NA	NA	NA	NA	5	3
PARD6G	NA	enriched	NA	depleted	NA	NA	NA	enriched	enriched	enriched	enriched	NA	NA	NA	depleted	NA	NA	depleted	NA	NA	NA	NA	5	3
PSMG4	NA	NA	depleted	NA	enriched	enriched	NA	depleted	NA	enriched	NA	NA	NA	NA	enriched	NA	enriched	NA	NA	NA	depleted	NA	5	3
PTPN13	NA	NA	NA	depleted	NA	depleted	NA	NA	NA	NA	NA	enriched	enriched	enriched	enriched	NA	NA	enriched	NA	depleted	NA	NA	5	3
SFPQ	NA	enriched	enriched	NA	NA	NA	NA	NA	depleted	NA	NA	NA	enriched	depleted	NA	enriched	NA	NA	NA	depleted	enriched	NA	5	3
SFXN5	NA	NA	enriched	depleted	enriched	enriched	NA	NA	NA	NA	depleted	NA	enriched	NA	enriched	NA	NA	NA	NA	depleted	NA	NA	5	3
SLC39A10	NA	NA	enriched	NA	NA	depleted	NA	enriched	NA	NA	NA	enriched	NA	depleted	NA	NA	enriched	enriched	NA	NA	depleted	NA	5	3
SLC39A3	enriched	NA	enriched	enriched	NA	NA	NA	depleted	NA	NA	NA	NA	depleted	NA	NA	NA	NA	depleted	enriched	NA	NA	enriched	5	3
SLF2	enriched	NA	NA	NA	NA	NA	NA	depleted	depleted	NA	NA	NA	enriched	NA	enriched	enriched	NA	enriched	NA	depleted	NA	NA	5	3
STEAP1B	NA	NA	depleted	NA	enriched	enriched	NA	NA	NA	NA	NA	NA	NA	enriched	depleted	enriched	enriched	depleted	NA	NA	NA	NA	5	3
TMEM126B	NA	NA	depleted	NA	NA	NA	enriched	NA	NA	NA	NA	enriched	enriched	depleted	NA	NA	NA	enriched	enriched	depleted	NA	NA	5	3
TTC21B	NA	NA	NA	enriched	NA	depleted	NA	NA	depleted	NA	NA	enriched	NA	enriched	enriched	NA	NA	enriched	NA	depleted	NA	NA	5	3
TVP23C	NA	enriched	enriched	depleted	NA	NA	NA	enriched	NA	NA	NA	NA	NA	enriched	NA	NA	NA	depleted	NA	NA	enriched	depleted	5	3
UPF3A	NA	NA	NA	enriched	enriched	NA	NA	NA	NA	NA	enriched	NA	NA	enriched	depleted	NA	depleted	depleted	NA	NA	NA	enriched	5	3
VPS13A	NA	NA	enriched	depleted	NA	NA	NA	NA	NA	NA	depleted	enriched	enriched	depleted	enriched	NA	NA	enriched	NA	NA	NA	NA	5	3
WSB2	NA	NA	enriched	NA	NA	NA	enriched	NA	depleted	NA	NA	enriched	enriched	NA	NA	NA	depleted	NA	NA	enriched	depleted	NA	5	3
ZNF841	NA	NA	enriched	NA	NA	enriched	NA	NA	NA	NA	NA	NA	NA	enriched	depleted	depleted	NA	depleted	NA	enriched	NA	enriched	5	3
AAMDC	depleted	NA	NA	depleted	NA	NA	NA	NA	NA	enriched	NA	NA	NA	enriched	NA	NA	depleted	depleted	NA	enriched	enriched	enriched	5	4
AHI1	enriched	NA	NA	depleted	NA	enriched	NA	enriched	NA	NA	NA	NA	NA	NA	depleted	enriched	NA	depleted	NA	depleted	NA	enriched	5	4
ANKAR	NA	NA	depleted	NA	enriched	enriched	NA	NA	NA	NA	depleted	depleted	NA	NA	enriched	NA	enriched	depleted	NA	NA	enriched	NA	5	4
ANKH	NA	NA	enriched	depleted	NA	NA	NA	NA	depleted	NA	NA	enriched	enriched	enriched	depleted	NA	NA	depleted	NA	enriched	NA	NA	5	4
ANKHD1	NA	NA	enriched	depleted	NA	enriched	NA	enriched	enriched	NA	depleted	NA	NA	NA	depleted	NA	depleted	NA	NA	NA	NA	enriched	5	4
BORCS8-MEF2B	NA	enriched	enriched	enriched	NA	NA	NA	depleted	depleted	depleted	NA	NA	NA	NA	NA	NA	NA	depleted	NA	NA	enriched	enriched	5	4
C20orf96	NA	enriched	enriched	depleted	NA	NA	NA	NA	depleted	depleted	NA	NA	enriched	depleted	NA	NA	NA	NA	NA	enriched	enriched	NA	5	4
CARD8	NA	NA	enriched	depleted	NA	enriched	NA	depleted	enriched	NA	NA	NA	depleted	NA	depleted	NA	NA	enriched	NA	NA	enriched	NA	5	4
CCDC88C	depleted	NA	depleted	NA	enriched	NA	NA	enriched	enriched	enriched	NA	NA	NA	enriched	depleted	depleted	NA	NA	NA	NA	NA	NA	5	4
CDK6	NA	NA	NA	depleted	enriched	NA	NA	NA	depleted	depleted	NA	enriched	NA	depleted	enriched	NA	enriched	enriched	NA	NA	NA	NA	5	4
CUL7	enriched	depleted	depleted	NA	NA	NA	NA	NA	enriched	enriched	enriched	NA	NA	enriched	depleted	NA	NA	depleted	NA	NA	NA	NA	5	4
EIF2B3	enriched	enriched	NA	NA	NA	enriched	NA	depleted	depleted	depleted	NA	enriched	NA	enriched	NA	depleted	NA	NA	NA	NA	NA	NA	5	4
ELP5	NA	NA	depleted	depleted	NA	depleted	NA	enriched	enriched	NA	NA	NA	enriched	NA	depleted	NA	enriched	enriched	NA	NA	NA	NA	5	4
FAM149A	enriched	NA	NA	depleted	NA	NA	NA	enriched	depleted	NA	NA	NA	enriched	depleted	depleted	NA	NA	enriched	enriched	NA	NA	NA	5	4
FAM208A	NA	enriched	NA	NA	NA	NA	NA	depleted	depleted	depleted	NA	enriched	enriched	enriched	NA	NA	depleted	NA	NA	NA	NA	enriched	5	4
GRAP2	enriched	NA	NA	NA	NA	depleted	NA	NA	depleted	NA	enriched	NA	NA	enriched	depleted	NA	NA	depleted	NA	enriched	NA	enriched	5	4
KLHL18	enriched	NA	enriched	depleted	NA	enriched	NA	enriched	NA	NA	NA	NA	NA	depleted	NA	NA	depleted	depleted	NA	NA	NA	enriched	5	4
MIA2	NA	NA	enriched	depleted	NA	NA	NA	enriched	NA	NA	NA	NA	NA	enriched	depleted	NA	NA	depleted	NA	enriched	depleted	enriched	5	4
MRM3	enriched	NA	depleted	enriched	NA	NA	enriched	NA	depleted	depleted	NA	NA	enriched	NA	enriched	NA	NA	depleted	NA	NA	NA	NA	5	4
NECTIN2	depleted	depleted	depleted	NA	enriched	NA	enriched	NA	enriched	NA	enriched	depleted	NA	NA	enriched	NA	NA	NA	NA	NA	NA	NA	5	4
NRP2	depleted	NA	NA	enriched	depleted	NA	NA	NA	NA	enriched	NA	enriched	enriched	enriched	depleted	NA	depleted	NA	NA	NA	NA	NA	5	4
POC1B	NA	NA	depleted	NA	NA	NA	NA	NA	NA	NA	NA	enriched	NA	enriched	depleted	enriched	NA	enriched	NA	depleted	depleted	enriched	5	4
PVR	NA	depleted	NA	NA	NA	NA	enriched	NA	depleted	NA	NA	enriched	enriched	enriched	enriched	NA	NA	depleted	depleted	NA	NA	NA	5	4
RAB40B	NA	NA	enriched	enriched	NA	NA	NA	NA	NA	depleted	NA	NA	depleted	enriched	NA	NA	depleted	enriched	NA	NA	depleted	enriched	5	4
RHOF	NA	depleted	depleted	NA	enriched	NA	NA	enriched	NA	NA	NA	NA	enriched	NA	NA	enriched	enriched	NA	NA	NA	depleted	depleted	5	4
SLC26A1	enriched	NA	NA	depleted	NA	NA	NA	enriched	NA	NA	depleted	NA	NA	enriched	depleted	NA	enriched	NA	enriched	NA	depleted	NA	5	4
SPRED2	NA	NA	enriched	depleted	NA	NA	NA	depleted	NA	depleted	NA	enriched	enriched	enriched	enriched	NA	NA	depleted	NA	NA	NA	NA	5	4
TRIM73	NA	NA	depleted	NA	depleted	enriched	NA	depleted	NA	NA	NA	NA	NA	NA	enriched	enriched	NA	depleted	enriched	enriched	NA	NA	5	4
ZDHHC14	NA	NA	NA	NA	enriched	NA	NA	depleted	depleted	NA	NA	enriched	enriched	NA	depleted	NA	enriched	NA	enriched	NA	depleted	NA	5	4
ZNF219	enriched	NA	enriched	enriched	depleted	enriched	NA	NA	NA	NA	NA	NA	enriched	NA	NA	NA	depleted	NA	depleted	depleted	NA	NA	5	4
ZNF644	enriched	NA	NA	NA	NA	NA	NA	depleted	depleted	depleted	NA	enriched	NA	enriched	enriched	NA	depleted	NA	NA	NA	NA	enriched	5	4
ASB3	NA	NA	enriched	depleted	NA	NA	NA	depleted	NA	NA	NA	enriched	enriched	NA	depleted	enriched	NA	depleted	NA	NA	depleted	enriched	5	5
CDK13	NA	enriched	enriched	NA	NA	depleted	NA	NA	depleted	NA	enriched	NA	enriched	depleted	enriched	NA	depleted	depleted	NA	NA	NA	NA	5	5
CNNM2	NA	enriched	enriched	depleted	depleted	NA	NA	depleted	NA	NA	NA	enriched	NA	NA	depleted	NA	depleted	enriched	NA	NA	NA	enriched	5	5
NCBP3	enriched	enriched	NA	enriched	NA	NA	NA	NA	depleted	depleted	NA	depleted	NA	NA	NA	NA	NA	depleted	NA	depleted	enriched	enriched	5	5
NUP58	NA	NA	NA	depleted	NA	NA	depleted	enriched	depleted	NA	NA	enriched	NA	NA	depleted	enriched	NA	depleted	NA	enriched	NA	enriched	5	5
PIH1D2	enriched	NA	enriched	NA	NA	NA	NA	NA	enriched	enriched	NA	depleted	depleted	NA	NA	NA	NA	NA	depleted	depleted	enriched	depleted	5	5
RAPH1	NA	NA	enriched	NA	NA	NA	NA	depleted	depleted	depleted	NA	NA	NA	enriched	enriched	NA	NA	enriched	NA	depleted	depleted	enriched	5	5
RNF213	NA	enriched	NA	enriched	NA	NA	enriched	depleted	depleted	depleted	NA	NA	enriched	NA	NA	depleted	NA	enriched	NA	depleted	NA	NA	5	5
RPS24	NA	enriched	NA	NA	enriched	NA	NA	enriched	depleted	depleted	NA	NA	NA	depleted	depleted	NA	enriched	depleted	enriched	NA	NA	NA	5	5
SHANK1	enriched	enriched	enriched	NA	NA	NA	NA	NA	depleted	depleted	NA	NA	NA	depleted	depleted	NA	NA	NA	NA	depleted	enriched	enriched	5	5
SLC35A3	enriched	NA	NA	NA	NA	NA	NA	depleted	depleted	NA	NA	NA	enriched	depleted	NA	NA	depleted	depleted	enriched	enriched	NA	enriched	5	5
SPG11	enriched	NA	NA	NA	depleted	NA	NA	enriched	NA	NA	NA	NA	depleted	enriched	enriched	NA	depleted	enriched	depleted	NA	NA	depleted	5	5
TOR1B	enriched	NA	NA	NA	depleted	NA	NA	NA	depleted	NA	NA	NA	NA	enriched	enriched	NA	depleted	enriched	NA	depleted	enriched	depleted	5	5
VTI1A	enriched	depleted	NA	NA	enriched	enriched	NA	depleted	NA	NA	NA	NA	NA	enriched	depleted	NA	depleted	enriched	NA	NA	NA	depleted	5	5
ZNF720	NA	NA	NA	enriched	NA	enriched	NA	depleted	NA	NA	enriched	depleted	NA	depleted	enriched	NA	enriched	depleted	NA	depleted	NA	NA	5	5
ANKHD1-EIF4EBP3	NA	NA	depleted	enriched	NA	NA	enriched	depleted	NA	NA	NA	NA	enriched	depleted	enriched	depleted	enriched	NA	NA	depleted	NA	depleted	5	6
BPGM	NA	enriched	enriched	depleted	NA	depleted	depleted	NA	depleted	NA	depleted	enriched	NA	enriched	depleted	NA	enriched	NA	NA	NA	NA	NA	5	6
CHURC1-FNTB	NA	depleted	NA	NA	NA	enriched	NA	depleted	depleted	depleted	NA	NA	NA	enriched	enriched	depleted	NA	enriched	NA	NA	enriched	depleted	5	6
GRIP2	depleted	NA	enriched	NA	depleted	NA	NA	depleted	NA	NA	NA	enriched	enriched	enriched	enriched	NA	depleted	depleted	NA	depleted	NA	NA	5	6
IP6K2	enriched	NA	enriched	depleted	NA	NA	NA	depleted	depleted	NA	NA	enriched	enriched	NA	depleted	NA	enriched	depleted	NA	NA	NA	depleted	5	6
KANSL1L	NA	depleted	depleted	NA	enriched	NA	depleted	NA	NA	NA	NA	NA	depleted	enriched	enriched	NA	enriched	enriched	NA	depleted	depleted	NA	5	6
LNPK	NA	NA	NA	NA	enriched	NA	enriched	depleted	depleted	depleted	NA	NA	NA	enriched	enriched	depleted	depleted	enriched	NA	depleted	NA	NA	5	6
MMD	NA	NA	depleted	enriched	enriched	NA	NA	NA	depleted	depleted	NA	NA	enriched	NA	depleted	NA	NA	depleted	enriched	depleted	enriched	NA	5	6
PLEKHA5	enriched	enriched	NA	NA	depleted	depleted	depleted	NA	depleted	depleted	NA	NA	NA	NA	enriched	enriched	NA	enriched	NA	depleted	NA	NA	5	6
PUDP	NA	depleted	enriched	NA	NA	NA	depleted	depleted	NA	NA	NA	NA	depleted	enriched	enriched	NA	depleted	enriched	NA	NA	depleted	enriched	5	6
RNF220	NA	enriched	enriched	depleted	depleted	NA	NA	NA	depleted	NA	depleted	NA	depleted	enriched	enriched	NA	NA	depleted	NA	NA	NA	enriched	5	6
RPA1	enriched	enriched	enriched	depleted	NA	NA	depleted	NA	depleted	depleted	NA	enriched	NA	NA	depleted	NA	NA	depleted	NA	NA	NA	enriched	5	6
RTKN2	NA	NA	depleted	NA	enriched	NA	NA	NA	depleted	NA	NA	NA	enriched	enriched	NA	depleted	depleted	depleted	depleted	enriched	enriched	NA	5	6
ZFP28	NA	NA	depleted	NA	NA	NA	enriched	depleted	depleted	depleted	NA	NA	enriched	enriched	enriched	depleted	depleted	NA	NA	enriched	NA	NA	5	6
AHNAK	depleted	NA	depleted	enriched	depleted	NA	enriched	depleted	NA	NA	enriched	NA	depleted	depleted	NA	enriched	NA	enriched	NA	NA	NA	depleted	5	7
ALG13	enriched	enriched	enriched	depleted	depleted	NA	NA	NA	depleted	depleted	NA	NA	NA	enriched	depleted	NA	depleted	enriched	NA	depleted	NA	NA	5	7
FLJ44635	depleted	NA	depleted	enriched	depleted	NA	enriched	NA	NA	depleted	enriched	NA	NA	NA	enriched	depleted	depleted	NA	NA	enriched	depleted	NA	5	7
MBD1	depleted	NA	NA	enriched	NA	depleted	depleted	enriched	enriched	depleted	NA	NA	depleted	NA	enriched	depleted	NA	enriched	NA	NA	NA	depleted	5	7
MSANTD3-TMEFF1	NA	NA	enriched	depleted	enriched	NA	depleted	depleted	NA	depleted	depleted	NA	NA	enriched	depleted	enriched	enriched	NA	NA	NA	depleted	NA	5	7
NEDD4L	NA	NA	enriched	depleted	NA	enriched	NA	NA	enriched	enriched	depleted	NA	NA	NA	depleted	depleted	NA	depleted	depleted	depleted	enriched	NA	5	7
SARNP	enriched	NA	enriched	enriched	depleted	NA	depleted	NA	NA	NA	NA	NA	depleted	enriched	depleted	depleted	depleted	depleted	NA	enriched	NA	NA	5	7
STX8	enriched	NA	depleted	NA	enriched	NA	NA	depleted	depleted	depleted	NA	NA	depleted	depleted	NA	enriched	enriched	NA	enriched	depleted	NA	NA	5	7
C6orf132	enriched	NA	enriched	depleted	NA	enriched	depleted	depleted	depleted	depleted	NA	enriched	NA	depleted	depleted	NA	depleted	NA	NA	NA	enriched	NA	5	8
CXADR	NA	NA	enriched	NA	NA	depleted	NA	depleted	depleted	NA	depleted	NA	enriched	enriched	NA	enriched	depleted	depleted	NA	depleted	depleted	enriched	5	8
IVD	enriched	NA	enriched	depleted	depleted	NA	NA	enriched	depleted	depleted	depleted	NA	NA	depleted	enriched	enriched	depleted	NA	NA	depleted	NA	NA	5	8
ORAOV1	enriched	NA	enriched	NA	depleted	NA	NA	depleted	depleted	NA	enriched	NA	enriched	depleted	depleted	NA	depleted	depleted	NA	depleted	enriched	NA	5	8
PPP2R2D	NA	NA	depleted	enriched	depleted	enriched	NA	NA	depleted	depleted	NA	NA	depleted	depleted	depleted	NA	NA	enriched	enriched	NA	enriched	depleted	5	8
RRNAD1	NA	NA	depleted	enriched	enriched	depleted	depleted	depleted	NA	depleted	enriched	NA	NA	NA	depleted	NA	NA	depleted	NA	depleted	enriched	enriched	5	8
KLHL28	depleted	NA	enriched	enriched	NA	NA	depleted	enriched	depleted	depleted	enriched	depleted	depleted	NA	NA	enriched	depleted	depleted	NA	NA	depleted	NA	5	9
TUBB6	depleted	depleted	depleted	enriched	NA	NA	NA	depleted	enriched	enriched	NA	depleted	NA	depleted	enriched	depleted	NA	enriched	NA	NA	depleted	depleted	5	9
RBM14-RBM4	depleted	NA	NA	enriched	depleted	NA	enriched	NA	enriched	enriched	NA	depleted	depleted	depleted	depleted	depleted	depleted	enriched	NA	depleted	NA	depleted	5	10
BAIAP2L1	depleted	depleted	depleted	enriched	NA	depleted	depleted	depleted	NA	depleted	NA	enriched	NA	depleted	enriched	depleted	NA	enriched	depleted	NA	enriched	depleted	5	11
RBM4	depleted	NA	depleted	enriched	depleted	NA	enriched	depleted	enriched	enriched	enriched	depleted	depleted	depleted	depleted	depleted	depleted	depleted	NA	depleted	NA	depleted	5	13
BCL2L2-PABPN1	depleted	depleted	depleted	enriched	depleted	depleted	NA	enriched	depleted	depleted	NA	depleted	depleted	enriched	enriched	NA	depleted	enriched	depleted	depleted	depleted	depleted	5	14
ABCB1	NA	NA	enriched	NA	NA	NA	enriched	NA	NA	NA	NA	enriched	NA	NA	NA	NA	NA	NA	NA	NA	enriched	NA	4	0
ABCC4	enriched	NA	NA	NA	NA	NA	NA	NA	NA	NA	NA	enriched	enriched	NA	NA	NA	NA	enriched	NA	NA	NA	NA	4	0
ABCD3	enriched	NA	enriched	NA	NA	NA	enriched	NA	NA	NA	NA	NA	enriched	NA	NA	NA	NA	NA	NA	NA	NA	NA	4	0
AFDN	NA	NA	NA	NA	NA	NA	enriched	NA	NA	NA	NA	NA	enriched	NA	enriched	NA	NA	NA	NA	NA	NA	enriched	4	0
ARMC3	NA	NA	enriched	NA	NA	NA	NA	NA	NA	NA	NA	enriched	enriched	NA	NA	NA	NA	NA	NA	NA	NA	enriched	4	0
ATPAF1	enriched	NA	enriched	NA	NA	NA	NA	NA	NA	NA	NA	NA	NA	NA	enriched	NA	NA	NA	NA	NA	enriched	NA	4	0
B4GALNT2	NA	NA	NA	NA	NA	NA	NA	enriched	enriched	enriched	NA	NA	NA	NA	NA	NA	NA	NA	NA	enriched	NA	NA	4	0
BCAT1	NA	NA	enriched	NA	NA	NA	NA	NA	NA	NA	NA	enriched	NA	NA	NA	NA	NA	enriched	NA	NA	NA	enriched	4	0
BICC1	NA	NA	NA	NA	enriched	NA	NA	NA	NA	NA	NA	NA	NA	NA	NA	NA	enriched	NA	NA	enriched	enriched	NA	4	0
C2orf49	NA	NA	enriched	NA	NA	NA	NA	NA	NA	NA	NA	enriched	enriched	NA	NA	NA	NA	NA	NA	NA	NA	enriched	4	0
C6orf106	NA	NA	enriched	NA	NA	NA	NA	NA	NA	NA	NA	enriched	NA	NA	NA	NA	enriched	NA	enriched	NA	NA	NA	4	0
CCDC60	enriched	NA	NA	NA	NA	NA	NA	NA	NA	NA	NA	NA	enriched	NA	NA	enriched	NA	NA	NA	NA	NA	enriched	4	0
CHAF1B	NA	NA	NA	NA	NA	NA	enriched	NA	NA	NA	NA	NA	enriched	enriched	enriched	NA	NA	NA	NA	NA	NA	NA	4	0
CNKSR2	enriched	NA	enriched	NA	NA	NA	NA	NA	enriched	NA	NA	NA	NA	NA	NA	NA	NA	NA	NA	NA	NA	enriched	4	0
CPO	NA	enriched	NA	NA	NA	NA	NA	NA	NA	enriched	NA	NA	NA	NA	NA	enriched	enriched	NA	NA	NA	NA	NA	4	0
CYFIP2	enriched	NA	enriched	NA	NA	NA	NA	NA	NA	NA	NA	NA	NA	NA	enriched	NA	NA	enriched	NA	NA	NA	NA	4	0
DHDDS	enriched	NA	enriched	NA	enriched	NA	NA	NA	NA	NA	NA	NA	NA	NA	NA	NA	NA	NA	NA	NA	enriched	NA	4	0
DMPK	NA	NA	NA	NA	NA	NA	NA	enriched	enriched	enriched	NA	NA	NA	NA	NA	NA	NA	enriched	NA	NA	NA	NA	4	0
DNPEP	enriched	NA	NA	NA	NA	NA	NA	enriched	NA	NA	NA	NA	enriched	NA	NA	NA	NA	enriched	NA	NA	NA	NA	4	0
FIG4	enriched	NA	enriched	NA	NA	NA	NA	NA	NA	NA	NA	NA	enriched	NA	NA	NA	NA	enriched	NA	NA	NA	NA	4	0
FKTN	NA	NA	enriched	NA	NA	NA	NA	NA	NA	NA	NA	NA	NA	NA	enriched	NA	NA	enriched	NA	NA	NA	enriched	4	0
GABRA2	NA	NA	NA	NA	enriched	NA	NA	NA	NA	NA	NA	NA	NA	enriched	NA	NA	enriched	NA	enriched	NA	NA	NA	4	0
GAD1	NA	NA	NA	NA	NA	NA	NA	enriched	enriched	enriched	NA	NA	NA	NA	NA	NA	NA	enriched	NA	NA	NA	NA	4	0
GPR158	NA	NA	NA	enriched	NA	NA	NA	NA	enriched	enriched	NA	NA	NA	NA	NA	NA	NA	NA	NA	enriched	NA	NA	4	0
GRK6	NA	NA	NA	NA	enriched	NA	enriched	NA	NA	NA	NA	enriched	NA	NA	NA	NA	enriched	NA	NA	NA	NA	NA	4	0
HOXC5	NA	NA	NA	NA	NA	NA	NA	NA	NA	NA	NA	NA	NA	enriched	NA	NA	NA	NA	enriched	NA	enriched	enriched	4	0
JRK	NA	NA	enriched	NA	NA	enriched	NA	NA	NA	NA	NA	NA	NA	NA	NA	NA	NA	enriched	enriched	NA	NA	NA	4	0
KATNBL1	enriched	NA	NA	NA	NA	NA	enriched	enriched	NA	NA	NA	NA	NA	NA	NA	NA	enriched	NA	NA	NA	NA	NA	4	0
KIAA0825	enriched	NA	enriched	NA	NA	NA	NA	enriched	NA	NA	NA	NA	NA	NA	NA	enriched	NA	NA	NA	NA	NA	NA	4	0
KIAA1328	NA	NA	enriched	NA	NA	enriched	NA	NA	NA	NA	NA	NA	NA	enriched	NA	NA	NA	enriched	NA	NA	NA	NA	4	0
LATS2	enriched	NA	enriched	NA	NA	NA	NA	NA	NA	enriched	NA	NA	NA	NA	NA	NA	NA	enriched	NA	NA	NA	NA	4	0
LDAH	NA	NA	enriched	enriched	NA	NA	NA	enriched	NA	NA	NA	NA	NA	enriched	NA	NA	NA	NA	NA	NA	NA	NA	4	0
LMAN2	NA	NA	NA	enriched	enriched	NA	NA	enriched	NA	NA	NA	NA	NA	enriched	NA	NA	NA	NA	NA	NA	NA	NA	4	0
MBLAC2	NA	NA	NA	NA	enriched	enriched	NA	NA	NA	enriched	NA	NA	NA	NA	NA	NA	NA	NA	NA	NA	enriched	NA	4	0
MRPL4	NA	NA	enriched	NA	NA	NA	NA	enriched	enriched	NA	NA	NA	NA	NA	enriched	NA	NA	NA	NA	NA	NA	NA	4	0
MTG1	NA	NA	NA	NA	NA	NA	NA	NA	NA	enriched	NA	NA	NA	enriched	enriched	NA	enriched	NA	NA	NA	NA	NA	4	0
OGFOD3	enriched	NA	enriched	NA	NA	NA	NA	NA	NA	NA	NA	NA	enriched	NA	NA	NA	enriched	NA	NA	NA	NA	NA	4	0
PAOX	NA	NA	enriched	enriched	NA	NA	enriched	NA	NA	enriched	NA	NA	NA	NA	NA	NA	NA	NA	NA	NA	NA	NA	4	0
PCSK6	NA	NA	NA	NA	NA	enriched	NA	NA	NA	NA	NA	NA	enriched	enriched	enriched	NA	NA	NA	NA	NA	NA	NA	4	0
PDE4D	NA	NA	enriched	NA	NA	NA	NA	NA	NA	NA	NA	enriched	NA	NA	NA	enriched	enriched	NA	NA	NA	NA	NA	4	0
PHF3	NA	NA	enriched	NA	NA	NA	NA	NA	NA	NA	NA	NA	enriched	NA	enriched	NA	NA	enriched	NA	NA	NA	NA	4	0
PIGN	NA	NA	NA	NA	NA	NA	enriched	NA	NA	NA	NA	NA	enriched	enriched	enriched	NA	NA	NA	NA	NA	NA	NA	4	0
PQLC2L	enriched	NA	NA	NA	NA	enriched	NA	NA	NA	NA	NA	NA	enriched	NA	NA	NA	NA	NA	NA	enriched	NA	NA	4	0
RANBP3L	enriched	enriched	NA	enriched	NA	NA	NA	NA	NA	NA	NA	NA	NA	enriched	NA	NA	NA	NA	NA	NA	NA	NA	4	0
RASSF5	NA	NA	NA	NA	NA	NA	NA	enriched	NA	NA	NA	NA	NA	NA	NA	enriched	enriched	NA	NA	NA	NA	enriched	4	0
REEP3	enriched	NA	enriched	NA	NA	NA	NA	NA	NA	NA	NA	NA	enriched	NA	NA	NA	NA	NA	NA	NA	NA	enriched	4	0
RIMBP2	NA	NA	enriched	NA	enriched	NA	NA	NA	NA	NA	NA	NA	NA	NA	NA	NA	enriched	NA	NA	NA	NA	enriched	4	0
SCAPER	NA	NA	NA	NA	NA	NA	enriched	NA	NA	NA	NA	enriched	enriched	NA	NA	NA	NA	NA	NA	NA	NA	enriched	4	0
SFXN4	NA	NA	NA	enriched	NA	NA	NA	NA	NA	NA	NA	NA	NA	enriched	enriched	NA	NA	enriched	NA	NA	NA	NA	4	0
SIPA1L1	NA	NA	enriched	NA	NA	NA	NA	NA	NA	NA	NA	NA	enriched	NA	NA	NA	NA	enriched	enriched	NA	NA	NA	4	0
SLC1A1	NA	NA	enriched	enriched	NA	NA	NA	NA	NA	NA	NA	NA	NA	NA	enriched	NA	NA	enriched	NA	NA	NA	NA	4	0
SLC22A11	NA	NA	NA	enriched	NA	NA	NA	NA	enriched	enriched	NA	NA	NA	enriched	NA	NA	NA	NA	NA	NA	NA	NA	4	0
SLC25A35	NA	enriched	NA	NA	NA	NA	NA	enriched	NA	NA	NA	NA	NA	enriched	NA	NA	NA	enriched	NA	NA	NA	NA	4	0
SPAG16	enriched	NA	NA	NA	NA	NA	NA	enriched	enriched	enriched	NA	NA	NA	NA	NA	NA	NA	NA	NA	NA	NA	NA	4	0
ST6GALNAC3	NA	NA	NA	NA	enriched	NA	enriched	NA	NA	NA	NA	NA	enriched	NA	NA	NA	NA	NA	NA	NA	NA	enriched	4	0
STAG2	NA	NA	enriched	NA	NA	NA	NA	NA	NA	NA	NA	NA	NA	NA	enriched	NA	NA	NA	enriched	NA	NA	enriched	4	0
SZT2	NA	NA	enriched	NA	NA	NA	NA	NA	NA	NA	NA	enriched	enriched	NA	NA	NA	NA	enriched	NA	NA	NA	NA	4	0
TBP	enriched	NA	NA	NA	NA	NA	NA	enriched	NA	enriched	NA	NA	enriched	NA	NA	NA	NA	NA	NA	NA	NA	NA	4	0
TCF3	NA	NA	enriched	NA	NA	enriched	NA	NA	NA	NA	NA	enriched	enriched	NA	NA	NA	NA	NA	NA	NA	NA	NA	4	0
TEAD1	NA	NA	NA	NA	NA	NA	NA	enriched	enriched	enriched	NA	NA	NA	NA	NA	NA	NA	NA	NA	enriched	NA	NA	4	0
TOLLIP	NA	NA	NA	NA	enriched	enriched	NA	NA	NA	NA	enriched	NA	NA	NA	NA	NA	enriched	NA	NA	NA	NA	NA	4	0
WASHC5	enriched	NA	enriched	NA	NA	NA	enriched	NA	NA	NA	NA	NA	enriched	NA	NA	NA	NA	NA	NA	NA	NA	NA	4	0
WIPI1	NA	NA	NA	NA	NA	NA	NA	enriched	NA	NA	NA	NA	NA	enriched	NA	NA	enriched	enriched	NA	NA	NA	NA	4	0
WNK4	NA	NA	NA	NA	enriched	NA	NA	NA	enriched	enriched	NA	NA	NA	NA	NA	NA	enriched	NA	NA	NA	NA	NA	4	0
ZNF517	NA	NA	NA	NA	NA	enriched	NA	NA	NA	NA	NA	NA	NA	NA	enriched	NA	NA	NA	NA	enriched	NA	enriched	4	0
ACTR8	NA	NA	NA	enriched	NA	NA	NA	enriched	NA	enriched	NA	NA	NA	NA	NA	NA	NA	enriched	depleted	NA	NA	NA	4	1
BAHCC1	enriched	NA	enriched	NA	enriched	NA	NA	NA	NA	NA	NA	NA	NA	depleted	enriched	NA	NA	NA	NA	NA	NA	NA	4	1
BNIPL	NA	NA	NA	NA	NA	NA	NA	enriched	enriched	enriched	NA	NA	NA	depleted	NA	NA	NA	enriched	NA	NA	NA	NA	4	1
C2orf68	NA	NA	enriched	enriched	NA	NA	NA	NA	NA	NA	enriched	NA	NA	enriched	NA	NA	NA	depleted	NA	NA	NA	NA	4	1
C2orf76	NA	NA	NA	NA	enriched	NA	NA	enriched	NA	NA	NA	NA	NA	NA	NA	NA	enriched	NA	enriched	NA	depleted	NA	4	1
CC2D2A	NA	NA	enriched	NA	NA	NA	NA	NA	NA	NA	NA	NA	NA	depleted	enriched	NA	NA	enriched	NA	NA	NA	enriched	4	1
CCDC148	NA	NA	depleted	NA	NA	NA	NA	NA	NA	enriched	NA	NA	enriched	NA	NA	NA	NA	enriched	NA	NA	NA	enriched	4	1
CCDC171	enriched	NA	enriched	NA	NA	NA	NA	enriched	NA	NA	NA	NA	enriched	NA	NA	NA	NA	NA	NA	NA	depleted	NA	4	1
CCDC180	NA	NA	depleted	NA	NA	NA	NA	enriched	NA	enriched	NA	NA	NA	NA	enriched	NA	NA	enriched	NA	NA	NA	NA	4	1
CD58	NA	NA	NA	NA	enriched	NA	NA	enriched	NA	NA	NA	enriched	NA	NA	enriched	NA	NA	NA	NA	depleted	NA	NA	4	1
CEBPZOS	enriched	NA	NA	NA	NA	NA	NA	enriched	NA	enriched	NA	NA	NA	NA	depleted	NA	NA	NA	NA	NA	NA	enriched	4	1
CWF19L2	NA	NA	enriched	NA	enriched	NA	NA	NA	NA	NA	NA	NA	enriched	NA	depleted	NA	NA	enriched	NA	NA	NA	NA	4	1
CYP27A1	enriched	NA	enriched	NA	NA	NA	NA	NA	NA	NA	NA	NA	enriched	depleted	NA	NA	NA	NA	NA	NA	NA	enriched	4	1
DNAH10	enriched	NA	depleted	NA	NA	NA	NA	NA	NA	enriched	NA	enriched	enriched	NA	NA	NA	NA	NA	NA	NA	NA	NA	4	1
DPY19L2	enriched	NA	depleted	NA	NA	NA	NA	NA	NA	NA	NA	NA	NA	enriched	enriched	NA	NA	NA	NA	NA	enriched	NA	4	1
DUSP18	NA	NA	NA	enriched	NA	NA	NA	NA	NA	enriched	NA	NA	NA	NA	NA	NA	NA	NA	enriched	NA	depleted	enriched	4	1
ENAH	enriched	NA	enriched	NA	NA	NA	enriched	NA	NA	NA	NA	NA	enriched	NA	depleted	NA	NA	NA	NA	NA	NA	NA	4	1
FAM135A	NA	NA	enriched	depleted	NA	NA	NA	NA	NA	NA	NA	NA	NA	NA	enriched	enriched	enriched	NA	NA	NA	NA	NA	4	1
GULP1	enriched	NA	enriched	NA	NA	NA	NA	depleted	NA	NA	NA	NA	NA	NA	enriched	NA	NA	enriched	NA	NA	NA	NA	4	1
GVQW2	NA	enriched	NA	enriched	NA	NA	NA	enriched	NA	NA	NA	NA	NA	NA	NA	NA	NA	NA	NA	enriched	depleted	NA	4	1
HERC4	NA	NA	enriched	NA	enriched	NA	enriched	NA	NA	NA	NA	NA	NA	NA	depleted	NA	NA	enriched	NA	NA	NA	NA	4	1
IDI1	NA	NA	enriched	depleted	NA	NA	NA	NA	enriched	enriched	NA	NA	NA	enriched	NA	NA	NA	NA	NA	NA	NA	NA	4	1
ITPK1	NA	NA	depleted	NA	enriched	enriched	NA	NA	NA	NA	NA	NA	NA	NA	NA	NA	enriched	NA	enriched	NA	NA	NA	4	1
KCTD15	NA	NA	NA	NA	enriched	NA	NA	NA	NA	enriched	NA	NA	NA	enriched	NA	NA	NA	depleted	NA	NA	NA	enriched	4	1
KHSRP	NA	NA	NA	NA	NA	NA	NA	NA	NA	NA	NA	NA	NA	enriched	enriched	NA	enriched	enriched	NA	depleted	NA	NA	4	1
LHFPL4	NA	NA	enriched	depleted	NA	NA	NA	NA	enriched	enriched	NA	NA	NA	NA	NA	NA	NA	enriched	NA	NA	NA	NA	4	1
MACROD1	NA	NA	NA	depleted	enriched	NA	NA	NA	NA	NA	enriched	NA	NA	NA	enriched	enriched	NA	NA	NA	NA	NA	NA	4	1
2022-03-02	NA	NA	NA	NA	enriched	NA	enriched	NA	NA	NA	NA	NA	NA	NA	depleted	NA	enriched	NA	NA	NA	NA	enriched	4	1
MCTP1	NA	NA	NA	NA	NA	NA	NA	enriched	NA	NA	depleted	NA	NA	NA	NA	NA	enriched	enriched	NA	NA	NA	enriched	4	1
PARPBP	NA	NA	NA	NA	enriched	NA	enriched	enriched	NA	NA	NA	NA	NA	NA	depleted	enriched	NA	NA	NA	NA	NA	NA	4	1
PHTF2	enriched	NA	enriched	NA	NA	NA	NA	NA	depleted	NA	NA	NA	NA	NA	enriched	NA	NA	enriched	NA	NA	NA	NA	4	1
PMF1-BGLAP	NA	NA	NA	NA	enriched	NA	NA	NA	NA	NA	NA	NA	NA	depleted	NA	NA	enriched	NA	enriched	NA	enriched	NA	4	1
PRR12	enriched	NA	NA	NA	NA	NA	NA	NA	NA	NA	NA	enriched	enriched	NA	depleted	NA	NA	NA	NA	NA	enriched	NA	4	1
RBSN	enriched	NA	NA	NA	NA	enriched	NA	NA	NA	NA	NA	NA	NA	NA	enriched	NA	NA	enriched	NA	depleted	NA	NA	4	1
RPL8	NA	NA	enriched	NA	NA	NA	NA	NA	NA	NA	NA	NA	NA	enriched	enriched	NA	NA	enriched	depleted	NA	NA	NA	4	1
RUFY3	NA	NA	enriched	NA	depleted	NA	NA	NA	NA	NA	NA	NA	NA	enriched	enriched	NA	NA	enriched	NA	NA	NA	NA	4	1
SLC13A3	NA	NA	NA	NA	NA	NA	enriched	NA	NA	NA	enriched	NA	NA	depleted	enriched	NA	NA	NA	NA	NA	enriched	NA	4	1
STIM2	NA	NA	enriched	NA	NA	enriched	enriched	NA	NA	NA	NA	NA	NA	depleted	NA	NA	enriched	NA	NA	NA	NA	NA	4	1
SYNE3	enriched	NA	NA	NA	NA	NA	NA	NA	NA	NA	NA	enriched	enriched	enriched	NA	NA	NA	depleted	NA	NA	NA	NA	4	1
TCTN1	NA	NA	NA	NA	NA	NA	NA	enriched	depleted	NA	NA	NA	NA	NA	enriched	NA	NA	enriched	NA	NA	NA	enriched	4	1
TENM4	depleted	NA	NA	NA	NA	NA	NA	enriched	NA	enriched	NA	NA	NA	NA	NA	NA	NA	NA	NA	enriched	enriched	NA	4	1
TIRAP	NA	NA	enriched	enriched	NA	enriched	NA	NA	NA	enriched	NA	NA	NA	NA	depleted	NA	NA	NA	NA	NA	NA	NA	4	1
TM9SF1	NA	NA	enriched	enriched	enriched	NA	NA	enriched	NA	NA	NA	NA	NA	NA	NA	NA	NA	depleted	NA	NA	NA	NA	4	1
TMEM255B	NA	NA	NA	NA	enriched	NA	NA	NA	NA	enriched	NA	NA	NA	enriched	enriched	NA	NA	depleted	NA	NA	NA	NA	4	1
TNNI3K	NA	NA	enriched	NA	NA	NA	NA	enriched	NA	enriched	NA	NA	NA	NA	NA	NA	NA	depleted	enriched	NA	NA	NA	4	1
TRAPPC13	enriched	NA	NA	enriched	NA	NA	NA	NA	NA	NA	NA	NA	enriched	NA	depleted	NA	NA	NA	NA	NA	NA	enriched	4	1
TRAPPC3	NA	NA	enriched	enriched	NA	NA	enriched	NA	NA	NA	NA	NA	NA	NA	NA	NA	NA	enriched	NA	depleted	NA	NA	4	1
TROAP	NA	enriched	enriched	NA	NA	enriched	NA	enriched	NA	NA	NA	NA	NA	NA	NA	NA	NA	depleted	NA	NA	NA	NA	4	1
VSIR	NA	NA	NA	NA	NA	NA	NA	NA	depleted	NA	NA	NA	enriched	enriched	NA	NA	NA	NA	NA	enriched	NA	enriched	4	1
WNT4	NA	enriched	enriched	NA	NA	NA	enriched	NA	NA	NA	NA	NA	enriched	NA	depleted	NA	NA	NA	NA	NA	NA	NA	4	1
WNT9B	NA	NA	NA	NA	NA	NA	NA	enriched	enriched	NA	NA	NA	enriched	NA	enriched	NA	NA	depleted	NA	NA	NA	NA	4	1
YARS2	enriched	NA	NA	NA	NA	enriched	NA	NA	NA	enriched	NA	NA	NA	NA	depleted	NA	NA	NA	NA	NA	NA	enriched	4	1
ZDHHC15	NA	enriched	NA	NA	NA	NA	NA	enriched	NA	NA	NA	NA	NA	NA	NA	NA	NA	depleted	NA	enriched	enriched	NA	4	1
ZNF345	NA	depleted	NA	NA	NA	enriched	NA	enriched	enriched	enriched	NA	NA	NA	NA	NA	NA	NA	NA	NA	NA	NA	NA	4	1
ZNF385D	enriched	enriched	NA	NA	NA	depleted	NA	NA	NA	enriched	NA	NA	NA	enriched	NA	NA	NA	NA	NA	NA	NA	NA	4	1
ZNF626	NA	NA	depleted	NA	enriched	NA	NA	NA	NA	NA	NA	NA	enriched	enriched	NA	NA	NA	NA	enriched	NA	NA	NA	4	1
ZNF714	NA	NA	NA	NA	enriched	depleted	NA	enriched	NA	NA	NA	NA	enriched	enriched	NA	NA	NA	NA	NA	NA	NA	NA	4	1
ZSCAN30	NA	NA	enriched	depleted	NA	NA	NA	NA	NA	NA	NA	enriched	NA	enriched	NA	NA	NA	enriched	NA	NA	NA	NA	4	1
ACTL6A	NA	NA	enriched	NA	enriched	NA	NA	depleted	NA	depleted	NA	NA	NA	NA	enriched	NA	NA	enriched	NA	NA	NA	NA	4	2
ALPK1	NA	NA	NA	NA	NA	NA	NA	NA	depleted	NA	NA	enriched	NA	enriched	enriched	NA	depleted	enriched	NA	NA	NA	NA	4	2
ANAPC1	enriched	NA	enriched	NA	enriched	NA	enriched	NA	NA	NA	NA	NA	NA	NA	depleted	NA	depleted	NA	NA	NA	NA	NA	4	2
ATRNL1	NA	NA	NA	NA	NA	NA	NA	enriched	NA	enriched	enriched	NA	NA	NA	depleted	NA	NA	NA	NA	NA	depleted	enriched	4	2
BACH1	NA	NA	NA	enriched	NA	NA	NA	enriched	NA	enriched	NA	NA	NA	NA	enriched	NA	NA	depleted	NA	NA	depleted	NA	4	2
BAZ2B	NA	NA	NA	enriched	NA	NA	NA	NA	NA	NA	NA	NA	enriched	NA	NA	NA	depleted	enriched	enriched	depleted	NA	NA	4	2
CDH18	NA	NA	NA	NA	NA	NA	depleted	enriched	NA	enriched	NA	NA	NA	depleted	NA	enriched	NA	NA	enriched	NA	NA	NA	4	2
CDKL1	NA	NA	enriched	NA	enriched	NA	NA	NA	enriched	enriched	NA	NA	NA	depleted	NA	NA	NA	NA	NA	NA	depleted	NA	4	2
CFAP46	NA	NA	depleted	NA	NA	NA	NA	NA	NA	enriched	NA	NA	enriched	NA	depleted	NA	NA	NA	NA	enriched	NA	enriched	4	2
CMTM1	NA	NA	NA	NA	NA	enriched	NA	depleted	NA	NA	NA	enriched	enriched	NA	enriched	NA	NA	NA	NA	NA	NA	depleted	4	2
CUX1	NA	NA	depleted	NA	NA	enriched	NA	NA	NA	enriched	NA	NA	enriched	NA	depleted	NA	NA	enriched	NA	NA	NA	NA	4	2
D2HGDH	NA	NA	NA	enriched	enriched	depleted	NA	NA	NA	NA	NA	NA	NA	NA	enriched	NA	enriched	NA	NA	depleted	NA	NA	4	2
DRAM2	enriched	NA	NA	depleted	enriched	NA	NA	NA	NA	NA	NA	NA	enriched	depleted	NA	NA	NA	enriched	NA	NA	NA	NA	4	2
EDNRB	NA	NA	NA	enriched	NA	NA	NA	NA	NA	NA	enriched	NA	NA	NA	enriched	NA	NA	enriched	NA	depleted	depleted	NA	4	2
EPHA4	NA	NA	enriched	depleted	NA	depleted	NA	NA	NA	NA	NA	NA	NA	enriched	enriched	NA	NA	enriched	NA	NA	NA	NA	4	2
ICA1L	NA	NA	enriched	NA	NA	NA	NA	NA	NA	NA	NA	NA	NA	NA	enriched	NA	NA	enriched	NA	depleted	depleted	enriched	4	2
KMT2C	NA	NA	enriched	NA	NA	NA	NA	NA	NA	NA	NA	NA	NA	depleted	NA	NA	NA	enriched	NA	depleted	enriched	enriched	4	2
KYAT3	depleted	NA	NA	NA	NA	NA	NA	NA	depleted	NA	NA	NA	NA	enriched	enriched	enriched	NA	enriched	NA	NA	NA	NA	4	2
MGST1	NA	NA	NA	enriched	NA	NA	NA	NA	NA	enriched	enriched	depleted	NA	depleted	NA	NA	enriched	NA	NA	NA	NA	NA	4	2
NUFIP2	NA	NA	enriched	NA	NA	NA	NA	NA	NA	depleted	NA	NA	enriched	NA	enriched	NA	NA	enriched	NA	depleted	NA	NA	4	2
OAS3	NA	NA	enriched	NA	NA	NA	NA	NA	NA	NA	NA	enriched	enriched	enriched	NA	NA	depleted	depleted	NA	NA	NA	NA	4	2
ODF2	NA	NA	enriched	NA	NA	depleted	NA	enriched	NA	NA	enriched	NA	NA	NA	depleted	NA	NA	NA	NA	NA	NA	enriched	4	2
PIGX	enriched	NA	NA	depleted	NA	NA	NA	NA	NA	NA	NA	NA	enriched	NA	enriched	NA	NA	depleted	NA	NA	NA	enriched	4	2
PLPBP	NA	NA	depleted	NA	NA	enriched	NA	enriched	NA	NA	NA	enriched	NA	NA	enriched	NA	NA	NA	NA	NA	depleted	NA	4	2
RGS9	NA	enriched	NA	depleted	NA	NA	NA	NA	NA	NA	NA	NA	enriched	depleted	NA	NA	NA	enriched	NA	NA	NA	enriched	4	2
RNPEP	NA	NA	NA	NA	enriched	NA	NA	NA	NA	NA	enriched	NA	NA	NA	enriched	NA	enriched	NA	NA	depleted	NA	depleted	4	2
RPL22	enriched	NA	enriched	NA	NA	NA	NA	NA	NA	NA	NA	NA	enriched	depleted	NA	NA	NA	enriched	NA	NA	depleted	NA	4	2
RPL34	NA	NA	NA	enriched	NA	NA	NA	NA	NA	enriched	NA	NA	NA	NA	enriched	NA	NA	enriched	NA	NA	depleted	depleted	4	2
RSRP1	NA	NA	NA	enriched	depleted	NA	NA	enriched	NA	NA	NA	NA	NA	enriched	enriched	NA	NA	NA	NA	NA	depleted	NA	4	2
SCMH1	enriched	NA	enriched	depleted	NA	enriched	NA	NA	NA	NA	NA	NA	NA	depleted	NA	NA	NA	enriched	NA	NA	NA	NA	4	2
SIRT5	enriched	NA	NA	enriched	NA	enriched	NA	depleted	NA	depleted	NA	NA	NA	NA	enriched	NA	NA	NA	NA	NA	NA	NA	4	2
SRSF11	enriched	depleted	enriched	NA	NA	NA	NA	NA	enriched	NA	NA	NA	NA	NA	NA	NA	NA	enriched	NA	NA	depleted	NA	4	2
TESMIN	NA	NA	NA	NA	enriched	enriched	NA	depleted	depleted	NA	NA	NA	NA	NA	NA	NA	NA	enriched	NA	NA	enriched	NA	4	2
TMEM38B	enriched	NA	enriched	depleted	NA	NA	NA	NA	NA	NA	NA	NA	NA	NA	enriched	NA	NA	enriched	depleted	NA	NA	NA	4	2
TNIK	enriched	NA	enriched	NA	enriched	NA	NA	depleted	NA	depleted	NA	NA	NA	NA	enriched	NA	NA	NA	NA	NA	NA	NA	4	2
TROVE2	NA	NA	enriched	NA	enriched	NA	NA	NA	NA	NA	NA	enriched	enriched	NA	depleted	NA	NA	NA	NA	depleted	NA	NA	4	2
VEPH1	NA	enriched	depleted	NA	NA	NA	NA	NA	NA	depleted	NA	enriched	enriched	NA	NA	NA	NA	NA	NA	enriched	NA	NA	4	2
XRN1	enriched	NA	NA	NA	NA	NA	enriched	NA	depleted	NA	NA	NA	NA	NA	enriched	NA	NA	enriched	NA	depleted	NA	NA	4	2
YLPM1	enriched	NA	NA	NA	NA	NA	NA	NA	NA	NA	NA	NA	enriched	enriched	depleted	NA	NA	depleted	NA	NA	enriched	NA	4	2
ZNF124	NA	NA	enriched	depleted	NA	NA	NA	enriched	enriched	NA	NA	NA	NA	enriched	depleted	NA	NA	NA	NA	NA	NA	NA	4	2
ZNF461	NA	NA	NA	depleted	enriched	enriched	NA	NA	NA	NA	depleted	NA	NA	NA	enriched	NA	enriched	NA	NA	NA	NA	NA	4	2
ZNF91	NA	NA	enriched	depleted	NA	NA	enriched	NA	NA	NA	NA	NA	enriched	NA	depleted	NA	enriched	NA	NA	NA	NA	NA	4	2
AGBL5	NA	NA	enriched	enriched	NA	NA	NA	depleted	NA	NA	enriched	NA	NA	NA	depleted	NA	NA	depleted	NA	NA	NA	enriched	4	3
AK2	NA	NA	enriched	NA	NA	NA	NA	NA	depleted	NA	NA	enriched	enriched	NA	enriched	NA	NA	NA	NA	depleted	depleted	NA	4	3
ALMS1	NA	NA	NA	NA	NA	depleted	NA	NA	NA	depleted	NA	enriched	NA	enriched	enriched	NA	NA	enriched	NA	depleted	NA	NA	4	3
APOPT1	enriched	enriched	depleted	enriched	depleted	NA	NA	NA	NA	NA	NA	NA	NA	enriched	NA	NA	depleted	NA	NA	NA	NA	NA	4	3
ARSG	NA	NA	enriched	NA	enriched	NA	NA	enriched	NA	NA	NA	NA	depleted	depleted	NA	NA	NA	depleted	NA	NA	enriched	NA	4	3
ATOH8	NA	NA	NA	enriched	NA	NA	NA	NA	depleted	depleted	NA	NA	NA	NA	enriched	NA	enriched	enriched	NA	depleted	NA	NA	4	3
B4GALNT1	NA	NA	enriched	NA	NA	NA	depleted	enriched	depleted	NA	depleted	NA	NA	enriched	enriched	NA	NA	NA	NA	NA	NA	NA	4	3
BMP2K	NA	NA	NA	depleted	NA	enriched	depleted	NA	depleted	NA	NA	NA	NA	NA	enriched	NA	NA	enriched	NA	enriched	NA	NA	4	3
C19orf44	NA	NA	enriched	depleted	NA	NA	NA	NA	NA	enriched	NA	NA	NA	NA	depleted	NA	NA	depleted	NA	enriched	NA	enriched	4	3
CASD1	NA	NA	NA	NA	enriched	NA	NA	depleted	depleted	depleted	NA	NA	enriched	NA	enriched	NA	NA	NA	NA	NA	NA	enriched	4	3
CEP41	NA	enriched	enriched	NA	NA	NA	NA	NA	NA	depleted	NA	NA	enriched	NA	depleted	NA	NA	depleted	NA	NA	NA	enriched	4	3
CKLF-CMTM1	NA	NA	NA	NA	NA	enriched	NA	depleted	NA	NA	NA	NA	enriched	enriched	enriched	NA	NA	depleted	NA	NA	NA	depleted	4	3
CYP4V2	NA	depleted	NA	NA	NA	NA	NA	enriched	NA	NA	NA	NA	enriched	NA	enriched	depleted	NA	enriched	NA	NA	NA	depleted	4	3
DERL3	NA	NA	NA	NA	depleted	NA	NA	NA	enriched	NA	NA	enriched	NA	NA	enriched	NA	depleted	enriched	NA	NA	depleted	NA	4	3
DHX15	NA	NA	enriched	NA	NA	NA	enriched	enriched	NA	depleted	NA	NA	NA	NA	enriched	NA	NA	depleted	NA	NA	depleted	NA	4	3
DLG5	enriched	enriched	NA	NA	NA	NA	NA	NA	NA	NA	NA	NA	NA	enriched	depleted	NA	NA	depleted	NA	depleted	NA	enriched	4	3
EMC3	enriched	depleted	NA	NA	NA	NA	NA	enriched	NA	enriched	NA	NA	NA	depleted	NA	NA	NA	NA	NA	NA	depleted	enriched	4	3
ERCC6	depleted	NA	enriched	NA	NA	enriched	NA	NA	NA	NA	NA	NA	NA	enriched	depleted	NA	depleted	NA	NA	NA	NA	enriched	4	3
ERV3-1	NA	depleted	NA	NA	NA	enriched	NA	NA	NA	NA	NA	NA	enriched	NA	depleted	NA	enriched	depleted	NA	NA	enriched	NA	4	3
FAM149B1	NA	NA	NA	enriched	NA	NA	depleted	enriched	NA	enriched	enriched	NA	NA	NA	depleted	NA	NA	depleted	NA	NA	NA	NA	4	3
FAM169A	NA	NA	NA	NA	NA	NA	enriched	NA	depleted	depleted	NA	NA	enriched	NA	enriched	NA	enriched	NA	NA	depleted	NA	NA	4	3
FAM185A	enriched	NA	NA	depleted	NA	enriched	NA	enriched	NA	NA	NA	NA	NA	NA	depleted	NA	NA	depleted	NA	enriched	NA	NA	4	3
FAM78B	depleted	NA	NA	NA	enriched	NA	NA	NA	enriched	NA	NA	NA	NA	NA	depleted	NA	enriched	depleted	enriched	NA	NA	NA	4	3
FBXO25	NA	NA	depleted	NA	NA	NA	NA	NA	enriched	NA	NA	NA	NA	depleted	enriched	NA	NA	enriched	NA	enriched	depleted	NA	4	3
FHAD1	NA	NA	NA	depleted	NA	NA	NA	NA	depleted	NA	NA	enriched	enriched	enriched	depleted	NA	NA	enriched	NA	NA	NA	NA	4	3
GALNT9	NA	NA	NA	NA	enriched	NA	NA	enriched	depleted	depleted	NA	NA	NA	enriched	NA	NA	NA	NA	NA	depleted	enriched	NA	4	3
GCH1	NA	NA	enriched	enriched	NA	NA	NA	NA	NA	NA	NA	NA	NA	enriched	enriched	NA	depleted	NA	NA	depleted	depleted	NA	4	3
HCK	NA	NA	NA	enriched	NA	NA	depleted	depleted	NA	depleted	NA	enriched	NA	enriched	NA	NA	enriched	NA	NA	NA	NA	NA	4	3
LDLRAD4	NA	enriched	NA	depleted	enriched	NA	NA	NA	NA	NA	NA	depleted	depleted	NA	NA	NA	enriched	enriched	NA	NA	NA	NA	4	3
MCM9	NA	NA	depleted	enriched	NA	NA	depleted	NA	NA	NA	enriched	NA	NA	enriched	NA	NA	NA	depleted	NA	enriched	NA	NA	4	3
MLH1	NA	NA	depleted	enriched	NA	enriched	NA	depleted	NA	depleted	NA	NA	NA	NA	NA	NA	enriched	enriched	NA	NA	NA	NA	4	3
MLXIP	enriched	NA	enriched	depleted	NA	NA	NA	enriched	NA	NA	NA	NA	enriched	NA	NA	NA	NA	depleted	depleted	NA	NA	NA	4	3
MTM1	NA	NA	enriched	NA	NA	NA	NA	depleted	NA	NA	NA	NA	NA	enriched	enriched	NA	depleted	enriched	depleted	NA	NA	NA	4	3
PNISR	NA	NA	enriched	depleted	NA	NA	enriched	NA	depleted	NA	NA	NA	NA	depleted	enriched	NA	NA	enriched	NA	NA	NA	NA	4	3
POLR1A	NA	NA	enriched	NA	NA	NA	NA	NA	depleted	depleted	NA	NA	enriched	NA	enriched	NA	NA	enriched	NA	depleted	NA	NA	4	3
POLR1D	NA	NA	NA	depleted	enriched	NA	enriched	NA	depleted	NA	NA	NA	NA	NA	depleted	enriched	NA	enriched	NA	NA	NA	NA	4	3
PTEN	NA	NA	enriched	NA	NA	NA	NA	NA	depleted	NA	NA	NA	enriched	enriched	depleted	enriched	NA	depleted	NA	NA	NA	NA	4	3
PUS7	NA	NA	enriched	NA	NA	depleted	NA	enriched	NA	NA	NA	NA	NA	NA	enriched	NA	NA	enriched	NA	depleted	depleted	NA	4	3
RPAP3	enriched	NA	NA	NA	NA	NA	enriched	NA	depleted	depleted	NA	NA	enriched	NA	NA	NA	NA	NA	NA	depleted	NA	enriched	4	3
SEC23IP	NA	NA	NA	NA	NA	NA	enriched	NA	depleted	NA	NA	NA	enriched	enriched	NA	NA	depleted	enriched	depleted	NA	NA	NA	4	3
SMAD2	NA	NA	NA	depleted	NA	NA	NA	enriched	NA	NA	NA	enriched	NA	NA	enriched	NA	NA	depleted	NA	NA	depleted	enriched	4	3
SMURF2	NA	enriched	enriched	NA	NA	NA	enriched	NA	depleted	depleted	NA	NA	NA	NA	depleted	NA	NA	NA	NA	enriched	NA	NA	4	3
SUPT20H	NA	NA	NA	depleted	NA	NA	NA	depleted	depleted	NA	NA	NA	NA	enriched	enriched	enriched	enriched	NA	NA	NA	NA	NA	4	3
TANC2	enriched	NA	enriched	NA	NA	NA	NA	depleted	NA	NA	NA	enriched	NA	NA	depleted	NA	depleted	enriched	NA	NA	NA	NA	4	3
TARSL2	enriched	NA	enriched	NA	enriched	NA	NA	depleted	depleted	depleted	NA	NA	NA	NA	enriched	NA	NA	NA	NA	NA	NA	NA	4	3
THOC2	enriched	NA	NA	NA	NA	NA	NA	depleted	depleted	NA	NA	enriched	NA	enriched	NA	NA	NA	enriched	NA	depleted	NA	NA	4	3
TRIM6-TRIM34	NA	NA	NA	enriched	NA	NA	NA	depleted	NA	NA	enriched	enriched	enriched	NA	NA	NA	depleted	NA	NA	NA	depleted	NA	4	3
TRIM74	NA	NA	NA	NA	NA	enriched	NA	depleted	NA	depleted	NA	NA	NA	NA	enriched	NA	NA	depleted	enriched	enriched	NA	NA	4	3
UBR1	NA	NA	enriched	enriched	NA	NA	NA	NA	NA	depleted	NA	NA	NA	NA	enriched	NA	depleted	enriched	NA	depleted	NA	NA	4	3
ZCCHC14	NA	NA	enriched	depleted	NA	NA	enriched	enriched	NA	NA	NA	NA	NA	NA	NA	NA	NA	enriched	NA	depleted	depleted	NA	4	3
ZDHHC17	enriched	NA	enriched	NA	NA	depleted	NA	depleted	NA	depleted	NA	NA	NA	NA	enriched	NA	NA	enriched	NA	NA	NA	NA	4	3
ZNF142	enriched	NA	NA	NA	NA	NA	enriched	depleted	NA	NA	NA	NA	NA	enriched	NA	NA	NA	enriched	NA	depleted	NA	depleted	4	3
ZNF215	NA	NA	depleted	NA	depleted	enriched	NA	NA	NA	NA	NA	enriched	NA	NA	NA	NA	depleted	enriched	NA	enriched	NA	NA	4	3
ZNF431	NA	NA	NA	depleted	NA	NA	NA	enriched	enriched	enriched	NA	NA	NA	NA	NA	NA	depleted	NA	NA	depleted	NA	enriched	4	3
ZNF816-ZNF321P	NA	enriched	NA	depleted	NA	NA	NA	NA	NA	NA	NA	NA	enriched	depleted	enriched	depleted	NA	enriched	NA	NA	NA	NA	4	3
ATM	enriched	NA	enriched	NA	NA	NA	NA	enriched	depleted	NA	NA	NA	NA	depleted	enriched	NA	depleted	NA	NA	depleted	NA	NA	4	4
BIVM-ERCC5	enriched	NA	NA	NA	enriched	NA	NA	depleted	NA	NA	NA	NA	NA	enriched	enriched	NA	depleted	NA	NA	depleted	NA	depleted	4	4
C16orf62	depleted	NA	enriched	depleted	NA	NA	NA	NA	NA	NA	NA	NA	depleted	depleted	NA	NA	NA	enriched	NA	NA	enriched	enriched	4	4
CCNL2	NA	enriched	depleted	NA	NA	NA	enriched	NA	depleted	NA	depleted	enriched	enriched	NA	NA	NA	NA	NA	NA	NA	NA	depleted	4	4
FAM177B	NA	depleted	NA	depleted	enriched	enriched	NA	NA	NA	NA	NA	depleted	NA	NA	depleted	NA	enriched	NA	NA	NA	enriched	NA	4	4
HECW1	depleted	NA	NA	NA	NA	NA	NA	enriched	NA	enriched	NA	depleted	NA	depleted	NA	NA	NA	enriched	NA	enriched	NA	depleted	4	4
IFIH1	NA	depleted	depleted	enriched	NA	NA	NA	depleted	depleted	NA	NA	NA	NA	enriched	enriched	NA	NA	enriched	NA	NA	NA	NA	4	4
ITPR1	NA	depleted	depleted	enriched	NA	NA	NA	NA	NA	NA	NA	NA	NA	enriched	enriched	NA	NA	enriched	NA	depleted	depleted	NA	4	4
LEPROTL1	NA	NA	NA	NA	NA	enriched	NA	depleted	depleted	NA	NA	NA	enriched	enriched	enriched	NA	depleted	NA	NA	NA	NA	depleted	4	4
MACF1	enriched	NA	enriched	NA	NA	NA	NA	depleted	depleted	NA	NA	NA	NA	NA	enriched	NA	depleted	enriched	NA	depleted	NA	NA	4	4
ODF2L	NA	NA	depleted	NA	NA	NA	NA	enriched	NA	NA	NA	NA	enriched	enriched	depleted	NA	NA	enriched	depleted	depleted	NA	NA	4	4
PARP4	NA	NA	NA	enriched	NA	depleted	NA	depleted	NA	NA	enriched	NA	NA	NA	enriched	NA	depleted	enriched	NA	depleted	NA	NA	4	4
PDXK	enriched	NA	depleted	depleted	NA	enriched	NA	NA	enriched	NA	depleted	NA	NA	NA	depleted	NA	NA	NA	enriched	NA	NA	NA	4	4
PDZD8	enriched	NA	enriched	NA	NA	NA	NA	depleted	depleted	depleted	NA	NA	NA	NA	NA	enriched	NA	enriched	NA	depleted	NA	NA	4	4
PTPRS	enriched	NA	depleted	enriched	NA	NA	NA	NA	NA	depleted	NA	NA	NA	NA	enriched	NA	NA	enriched	depleted	depleted	NA	NA	4	4
RNF165	enriched	enriched	NA	NA	NA	NA	NA	depleted	depleted	NA	depleted	NA	enriched	NA	NA	NA	NA	depleted	NA	NA	NA	enriched	4	4
RUNX2	NA	enriched	NA	enriched	NA	NA	NA	NA	depleted	NA	enriched	NA	NA	NA	depleted	NA	NA	depleted	NA	depleted	enriched	NA	4	4
SARS	enriched	NA	NA	NA	NA	NA	enriched	depleted	depleted	NA	enriched	NA	NA	NA	NA	NA	NA	enriched	NA	depleted	depleted	NA	4	4
SETD9	NA	NA	enriched	NA	enriched	NA	depleted	NA	NA	NA	NA	enriched	NA	NA	depleted	NA	NA	depleted	NA	enriched	depleted	NA	4	4
SMARCA4	NA	depleted	enriched	depleted	enriched	depleted	NA	NA	NA	NA	NA	NA	NA	enriched	enriched	NA	NA	NA	NA	NA	NA	depleted	4	4
SOS2	NA	NA	NA	NA	NA	NA	NA	depleted	depleted	depleted	NA	enriched	enriched	enriched	NA	NA	NA	depleted	NA	NA	NA	enriched	4	4
TAF1B	NA	enriched	enriched	NA	NA	depleted	NA	NA	depleted	NA	NA	NA	enriched	NA	depleted	NA	NA	depleted	NA	NA	NA	enriched	4	4
TAOK1	enriched	NA	NA	depleted	NA	NA	NA	depleted	NA	NA	NA	NA	NA	NA	enriched	NA	NA	enriched	NA	depleted	depleted	enriched	4	4
TBC1D16	enriched	NA	enriched	depleted	NA	NA	NA	NA	enriched	NA	depleted	NA	NA	depleted	depleted	NA	NA	NA	NA	NA	NA	enriched	4	4
TBC1D4	NA	NA	enriched	NA	NA	NA	NA	depleted	NA	depleted	NA	NA	NA	NA	enriched	NA	NA	enriched	NA	depleted	depleted	enriched	4	4
TCFL5	enriched	depleted	enriched	NA	NA	depleted	enriched	NA	NA	depleted	NA	NA	NA	enriched	NA	NA	depleted	NA	NA	NA	NA	NA	4	4
TRAPPC10	enriched	NA	NA	depleted	NA	NA	NA	NA	NA	NA	NA	enriched	enriched	depleted	depleted	NA	NA	NA	NA	NA	depleted	enriched	4	4
TRMU	enriched	enriched	enriched	NA	NA	NA	enriched	depleted	depleted	depleted	NA	NA	NA	depleted	NA	NA	NA	NA	NA	NA	NA	NA	4	4
TTC39C	NA	depleted	NA	enriched	NA	NA	NA	depleted	NA	NA	enriched	depleted	NA	NA	enriched	NA	NA	NA	NA	enriched	depleted	NA	4	4
TXNRD3	NA	NA	enriched	depleted	NA	depleted	NA	NA	NA	NA	NA	NA	NA	enriched	enriched	NA	NA	enriched	NA	depleted	NA	depleted	4	4
ZNF529	NA	NA	enriched	NA	NA	NA	NA	depleted	enriched	enriched	enriched	NA	NA	depleted	NA	NA	depleted	depleted	NA	NA	NA	NA	4	4
ZNF680	NA	NA	depleted	depleted	NA	NA	NA	NA	NA	NA	NA	NA	enriched	enriched	enriched	depleted	NA	depleted	NA	enriched	NA	NA	4	4
ZRSR2	NA	enriched	NA	NA	NA	NA	NA	depleted	depleted	NA	NA	NA	NA	enriched	enriched	NA	depleted	NA	depleted	NA	NA	enriched	4	4
ASXL2	enriched	NA	enriched	NA	NA	NA	NA	depleted	depleted	NA	NA	NA	NA	NA	enriched	NA	depleted	enriched	NA	depleted	depleted	NA	4	5
C1orf123	NA	NA	NA	enriched	enriched	NA	NA	NA	depleted	NA	enriched	depleted	NA	NA	depleted	NA	NA	NA	NA	depleted	enriched	depleted	4	5
C7orf50	NA	NA	NA	depleted	depleted	enriched	NA	NA	NA	NA	NA	NA	NA	depleted	enriched	NA	depleted	enriched	NA	NA	depleted	enriched	4	5
CCDC97	NA	NA	enriched	depleted	NA	NA	depleted	NA	depleted	NA	NA	enriched	NA	NA	enriched	NA	depleted	depleted	NA	enriched	NA	NA	4	5
CCL28	depleted	NA	NA	NA	depleted	enriched	NA	NA	depleted	NA	depleted	enriched	NA	enriched	NA	NA	depleted	enriched	NA	NA	NA	NA	4	5
EIF3E	NA	NA	enriched	NA	NA	NA	enriched	depleted	depleted	depleted	NA	NA	NA	enriched	NA	depleted	NA	enriched	NA	depleted	NA	NA	4	5
ELAC1	enriched	NA	NA	NA	NA	NA	NA	depleted	depleted	NA	NA	NA	enriched	enriched	depleted	NA	depleted	depleted	NA	NA	NA	enriched	4	5
HEXA	enriched	NA	depleted	enriched	NA	NA	NA	depleted	depleted	depleted	NA	enriched	NA	enriched	NA	NA	NA	NA	NA	depleted	NA	NA	4	5
HM13	NA	NA	NA	enriched	NA	depleted	NA	NA	NA	depleted	NA	NA	NA	enriched	enriched	NA	depleted	NA	NA	depleted	enriched	depleted	4	5
JADE1	NA	NA	NA	NA	NA	NA	NA	depleted	depleted	depleted	NA	enriched	enriched	enriched	enriched	NA	depleted	depleted	NA	NA	NA	NA	4	5
LOC100130357	NA	NA	depleted	depleted	NA	NA	NA	enriched	enriched	NA	NA	depleted	depleted	depleted	enriched	NA	NA	NA	NA	NA	enriched	NA	4	5
MAP3K20	NA	NA	NA	enriched	depleted	NA	NA	NA	depleted	NA	NA	NA	NA	enriched	enriched	depleted	NA	enriched	depleted	NA	depleted	NA	4	5
NOL7	NA	depleted	NA	NA	NA	enriched	enriched	NA	NA	NA	enriched	depleted	depleted	NA	depleted	NA	NA	depleted	enriched	NA	NA	NA	4	5
NUDCD3	NA	NA	depleted	depleted	enriched	NA	depleted	NA	NA	NA	NA	NA	NA	depleted	depleted	enriched	NA	NA	NA	NA	enriched	enriched	4	5
PABPC1	NA	NA	enriched	NA	enriched	depleted	NA	depleted	NA	depleted	NA	NA	NA	depleted	enriched	NA	NA	enriched	NA	depleted	NA	NA	4	5
PIEZO2	NA	NA	NA	depleted	NA	depleted	NA	NA	depleted	enriched	depleted	NA	NA	enriched	depleted	NA	NA	enriched	NA	NA	enriched	NA	4	5
PIGZ	NA	NA	NA	depleted	enriched	NA	NA	enriched	NA	NA	NA	NA	NA	depleted	depleted	enriched	NA	depleted	NA	NA	enriched	depleted	4	5
PLEKHA6	depleted	depleted	NA	NA	enriched	NA	enriched	enriched	enriched	NA	NA	depleted	NA	depleted	depleted	NA	NA	NA	NA	NA	NA	NA	4	5
PTPN2	NA	enriched	NA	depleted	NA	NA	enriched	NA	depleted	depleted	depleted	NA	NA	NA	enriched	NA	NA	enriched	NA	depleted	NA	NA	4	5
PTPRK	enriched	NA	NA	NA	NA	NA	NA	depleted	depleted	NA	NA	NA	NA	enriched	enriched	NA	depleted	enriched	NA	depleted	depleted	NA	4	5
QKI	NA	NA	enriched	NA	NA	enriched	NA	NA	NA	NA	NA	depleted	depleted	depleted	NA	NA	NA	depleted	enriched	enriched	NA	depleted	4	5
RMDN1	enriched	NA	enriched	depleted	depleted	NA	NA	depleted	NA	NA	NA	NA	enriched	NA	enriched	NA	depleted	NA	NA	depleted	NA	NA	4	5
ROCK2	NA	NA	enriched	NA	NA	NA	NA	depleted	depleted	depleted	NA	NA	NA	enriched	enriched	NA	depleted	enriched	NA	depleted	NA	NA	4	5
SEC61A2	NA	NA	NA	enriched	NA	NA	NA	depleted	depleted	NA	NA	NA	enriched	NA	enriched	depleted	NA	enriched	NA	depleted	depleted	NA	4	5
SPTBN1	NA	depleted	enriched	NA	NA	enriched	enriched	depleted	NA	NA	NA	depleted	NA	NA	depleted	NA	depleted	enriched	NA	NA	NA	NA	4	5
STAG1	NA	NA	enriched	NA	NA	depleted	NA	depleted	depleted	NA	NA	NA	enriched	depleted	enriched	NA	depleted	enriched	NA	NA	NA	NA	4	5
TRPM7	NA	NA	depleted	NA	NA	NA	enriched	depleted	depleted	NA	NA	enriched	NA	enriched	enriched	NA	depleted	depleted	NA	NA	NA	NA	4	5
XPO5	depleted	NA	NA	NA	NA	NA	NA	enriched	enriched	enriched	NA	NA	NA	depleted	depleted	NA	depleted	NA	depleted	enriched	NA	NA	4	5
ZNF678	enriched	NA	depleted	NA	NA	NA	NA	depleted	depleted	NA	NA	enriched	NA	enriched	NA	NA	NA	enriched	NA	depleted	NA	depleted	4	5
CNOT10	NA	NA	enriched	NA	NA	depleted	NA	depleted	depleted	NA	NA	NA	NA	enriched	enriched	NA	depleted	enriched	depleted	depleted	NA	NA	4	6
DPH6	NA	enriched	NA	depleted	NA	NA	NA	depleted	depleted	depleted	depleted	NA	NA	NA	enriched	NA	depleted	enriched	NA	NA	NA	enriched	4	6
EIF2AK1	enriched	NA	NA	NA	NA	depleted	NA	depleted	depleted	depleted	NA	NA	NA	enriched	enriched	NA	NA	enriched	depleted	NA	NA	depleted	4	6
FAM84A	NA	NA	enriched	NA	NA	NA	NA	NA	depleted	NA	depleted	NA	NA	depleted	depleted	enriched	depleted	depleted	NA	NA	enriched	enriched	4	6
FNDC3B	enriched	enriched	enriched	depleted	depleted	NA	NA	depleted	depleted	NA	NA	NA	NA	depleted	depleted	NA	NA	NA	NA	NA	NA	enriched	4	6
LZIC	NA	NA	NA	NA	NA	depleted	NA	depleted	depleted	depleted	NA	NA	enriched	enriched	NA	NA	NA	enriched	enriched	depleted	depleted	NA	4	6
MSI2	NA	enriched	enriched	depleted	NA	NA	NA	depleted	depleted	depleted	NA	NA	enriched	depleted	depleted	NA	NA	NA	NA	NA	NA	enriched	4	6
PIGL	NA	NA	depleted	NA	NA	enriched	NA	depleted	depleted	NA	NA	NA	enriched	enriched	enriched	depleted	depleted	depleted	NA	NA	NA	NA	4	6
POLR1C	NA	NA	NA	depleted	enriched	NA	depleted	NA	NA	NA	depleted	NA	NA	depleted	depleted	NA	enriched	depleted	NA	enriched	NA	enriched	4	6
POM121	depleted	enriched	NA	depleted	depleted	enriched	NA	depleted	NA	NA	NA	NA	NA	NA	enriched	NA	depleted	enriched	NA	depleted	NA	NA	4	6
PTBP3	NA	NA	NA	NA	NA	NA	enriched	NA	depleted	depleted	depleted	NA	enriched	NA	enriched	NA	depleted	enriched	NA	depleted	depleted	NA	4	6
SCAMP1	NA	NA	depleted	NA	NA	depleted	NA	depleted	depleted	depleted	NA	NA	enriched	enriched	enriched	NA	NA	enriched	depleted	NA	NA	NA	4	6
SPATA9	NA	NA	depleted	depleted	NA	NA	NA	NA	depleted	depleted	NA	NA	depleted	enriched	NA	NA	enriched	enriched	NA	enriched	depleted	NA	4	6
SSH2	enriched	NA	NA	depleted	NA	NA	NA	NA	depleted	depleted	NA	NA	enriched	enriched	depleted	NA	depleted	depleted	NA	NA	NA	enriched	4	6
SUCO	NA	NA	enriched	NA	NA	depleted	NA	depleted	depleted	NA	NA	NA	NA	enriched	enriched	NA	depleted	enriched	depleted	depleted	NA	NA	4	6
UBOX5	enriched	enriched	depleted	depleted	NA	enriched	NA	NA	depleted	NA	depleted	NA	NA	NA	depleted	NA	NA	NA	NA	depleted	NA	enriched	4	6
ZNF664-RFLNA	NA	NA	NA	depleted	enriched	NA	NA	NA	NA	NA	NA	depleted	depleted	depleted	NA	NA	enriched	depleted	NA	depleted	enriched	enriched	4	6
CAST	NA	NA	enriched	depleted	depleted	NA	NA	depleted	depleted	depleted	NA	NA	NA	enriched	enriched	NA	NA	enriched	NA	depleted	depleted	NA	4	7
MAP4K3	NA	NA	enriched	NA	NA	depleted	NA	depleted	depleted	depleted	NA	NA	NA	NA	enriched	NA	depleted	enriched	depleted	depleted	enriched	NA	4	7
NAA35	NA	depleted	NA	depleted	enriched	NA	NA	depleted	NA	NA	NA	depleted	NA	depleted	enriched	depleted	enriched	enriched	NA	NA	NA	depleted	4	7
SYCE1L	NA	enriched	NA	depleted	NA	enriched	NA	NA	depleted	depleted	NA	depleted	depleted	NA	NA	enriched	NA	depleted	NA	depleted	enriched	NA	4	7
TOR1AIP2	NA	NA	depleted	enriched	NA	NA	depleted	NA	depleted	enriched	NA	NA	NA	NA	depleted	enriched	depleted	enriched	NA	depleted	depleted	NA	4	7
USP6NL	NA	enriched	enriched	NA	depleted	NA	depleted	NA	depleted	depleted	NA	NA	NA	depleted	enriched	NA	depleted	enriched	NA	NA	NA	depleted	4	7
C15orf38-AP3S2	depleted	NA	depleted	enriched	NA	depleted	NA	NA	NA	NA	enriched	depleted	depleted	NA	enriched	NA	depleted	enriched	NA	NA	depleted	depleted	4	8
SNAPC5	depleted	NA	NA	enriched	depleted	depleted	NA	NA	depleted	NA	enriched	NA	NA	enriched	depleted	depleted	depleted	depleted	NA	NA	enriched	NA	4	8
TMEM161B	NA	NA	enriched	enriched	depleted	enriched	depleted	NA	NA	NA	NA	depleted	depleted	enriched	NA	depleted	depleted	depleted	NA	NA	NA	depleted	4	8
ASCC3	NA	NA	enriched	depleted	NA	depleted	NA	NA	depleted	depleted	NA	NA	depleted	enriched	enriched	NA	depleted	enriched	NA	depleted	depleted	depleted	4	9
DHX40	NA	NA	enriched	NA	depleted	depleted	NA	depleted	depleted	depleted	NA	NA	NA	enriched	enriched	NA	depleted	enriched	depleted	depleted	NA	depleted	4	9
HPS4	NA	depleted	depleted	depleted	NA	depleted	NA	NA	enriched	enriched	NA	depleted	depleted	depleted	depleted	NA	enriched	NA	NA	depleted	enriched	NA	4	9
LRTOMT	NA	NA	depleted	NA	NA	depleted	NA	depleted	depleted	depleted	NA	NA	depleted	enriched	enriched	enriched	NA	enriched	NA	depleted	depleted	depleted	4	9
GFM1	depleted	depleted	depleted	enriched	depleted	NA	depleted	depleted	enriched	enriched	NA	depleted	depleted	NA	enriched	NA	depleted	depleted	NA	NA	NA	NA	4	10
APOO	depleted	depleted	depleted	NA	NA	NA	depleted	depleted	enriched	enriched	NA	depleted	depleted	depleted	NA	NA	depleted	enriched	depleted	enriched	NA	depleted	4	11
CCNI2	depleted	depleted	depleted	depleted	depleted	depleted	NA	NA	enriched	enriched	NA	depleted	depleted	depleted	NA	enriched	depleted	enriched	depleted	NA	depleted	depleted	4	13
ABAT	NA	NA	enriched	NA	NA	enriched	NA	NA	NA	NA	NA	NA	enriched	NA	NA	NA	NA	NA	NA	NA	NA	NA	3	0
ADAM22	NA	NA	enriched	NA	enriched	NA	NA	NA	NA	NA	NA	NA	enriched	NA	NA	NA	NA	NA	NA	NA	NA	NA	3	0
ADAMTS1	NA	NA	enriched	NA	NA	NA	NA	NA	NA	NA	NA	NA	NA	NA	enriched	NA	NA	enriched	NA	NA	NA	NA	3	0
APOLD1	NA	NA	enriched	NA	NA	NA	NA	NA	NA	NA	NA	NA	NA	NA	NA	NA	enriched	NA	NA	NA	enriched	NA	3	0
APPBP2	NA	NA	NA	enriched	NA	enriched	NA	NA	NA	NA	NA	NA	NA	enriched	NA	NA	NA	NA	NA	NA	NA	NA	3	0
ARFRP1	NA	NA	NA	NA	NA	enriched	NA	NA	NA	NA	NA	NA	NA	NA	enriched	NA	enriched	NA	NA	NA	NA	NA	3	0
BACE2	NA	NA	enriched	NA	NA	NA	NA	enriched	NA	NA	NA	NA	NA	enriched	NA	NA	NA	NA	NA	NA	NA	NA	3	0
C17orf62	NA	NA	NA	enriched	NA	NA	NA	NA	NA	NA	NA	NA	NA	enriched	NA	NA	enriched	NA	NA	NA	NA	NA	3	0
C6orf141	NA	enriched	enriched	NA	NA	NA	NA	NA	NA	NA	NA	enriched	NA	NA	NA	NA	NA	NA	NA	NA	NA	NA	3	0
CERS1	NA	NA	NA	NA	NA	NA	NA	NA	NA	NA	NA	NA	NA	NA	enriched	NA	NA	NA	NA	enriched	NA	enriched	3	0
CLK1	enriched	NA	NA	NA	NA	NA	NA	enriched	NA	NA	NA	NA	NA	NA	enriched	NA	NA	NA	NA	NA	NA	NA	3	0
CNTN4	NA	NA	NA	NA	NA	NA	enriched	NA	NA	NA	NA	enriched	enriched	NA	NA	NA	NA	NA	NA	NA	NA	NA	3	0
CPS1	NA	NA	NA	NA	NA	NA	NA	NA	NA	NA	NA	NA	NA	enriched	NA	NA	NA	enriched	enriched	NA	NA	NA	3	0
CUL5	NA	NA	enriched	NA	NA	NA	NA	NA	NA	NA	NA	NA	NA	NA	enriched	NA	NA	enriched	NA	NA	NA	NA	3	0
DKK3	NA	NA	NA	NA	NA	NA	enriched	NA	NA	NA	NA	NA	NA	enriched	enriched	NA	NA	NA	NA	NA	NA	NA	3	0
DLL1	NA	NA	NA	NA	enriched	NA	NA	NA	NA	NA	NA	NA	NA	NA	enriched	NA	NA	enriched	NA	NA	NA	NA	3	0
DPYSL3	NA	NA	enriched	NA	NA	NA	NA	NA	NA	NA	NA	NA	NA	NA	enriched	NA	NA	enriched	NA	NA	NA	NA	3	0
EGLN1	NA	NA	enriched	NA	NA	NA	NA	NA	NA	NA	NA	NA	NA	NA	enriched	NA	NA	enriched	NA	NA	NA	NA	3	0
EIF5B	NA	enriched	enriched	NA	NA	NA	NA	NA	NA	NA	NA	NA	NA	enriched	NA	NA	NA	NA	NA	NA	NA	NA	3	0
EYA3	enriched	NA	enriched	NA	NA	NA	NA	NA	NA	NA	NA	NA	NA	NA	enriched	NA	NA	NA	NA	NA	NA	NA	3	0
GDA	NA	NA	NA	NA	NA	enriched	NA	NA	NA	enriched	NA	NA	NA	NA	NA	NA	NA	NA	enriched	NA	NA	NA	3	0
GDF1	NA	NA	NA	NA	NA	NA	NA	NA	NA	NA	NA	NA	NA	NA	enriched	NA	NA	NA	NA	enriched	NA	enriched	3	0
GLRX3	NA	NA	enriched	NA	NA	NA	NA	enriched	NA	NA	NA	NA	NA	enriched	NA	NA	NA	NA	NA	NA	NA	NA	3	0
GPR153	NA	NA	enriched	NA	NA	NA	NA	NA	NA	NA	NA	NA	NA	NA	enriched	NA	NA	NA	NA	enriched	NA	NA	3	0
GREB1	NA	NA	enriched	NA	NA	NA	NA	NA	NA	NA	NA	NA	NA	enriched	enriched	NA	NA	NA	NA	NA	NA	NA	3	0
HDDC2	NA	NA	NA	NA	NA	NA	enriched	NA	NA	enriched	NA	NA	NA	NA	NA	NA	NA	enriched	NA	NA	NA	NA	3	0
KCNC3	NA	NA	enriched	NA	NA	NA	NA	enriched	NA	NA	NA	NA	NA	NA	NA	enriched	NA	NA	NA	NA	NA	NA	3	0
KLHL5	NA	NA	enriched	NA	enriched	NA	NA	NA	NA	NA	NA	NA	NA	NA	NA	NA	NA	enriched	NA	NA	NA	NA	3	0
LATS1	NA	NA	enriched	NA	NA	NA	NA	NA	NA	NA	NA	NA	enriched	enriched	NA	NA	NA	NA	NA	NA	NA	NA	3	0
LEPROT	enriched	NA	NA	NA	enriched	NA	NA	NA	NA	NA	NA	NA	NA	NA	NA	NA	NA	NA	NA	NA	enriched	NA	3	0
LRRIQ1	NA	NA	enriched	NA	NA	NA	NA	NA	NA	NA	NA	NA	NA	NA	NA	NA	NA	NA	NA	enriched	NA	enriched	3	0
LRRIQ3	NA	enriched	NA	NA	NA	NA	NA	NA	NA	NA	NA	NA	NA	enriched	NA	NA	NA	NA	NA	NA	enriched	NA	3	0
LURAP1	NA	NA	NA	NA	enriched	NA	NA	NA	NA	NA	NA	NA	NA	enriched	NA	NA	enriched	NA	NA	NA	NA	NA	3	0
2022-03-03	NA	NA	NA	NA	NA	NA	NA	NA	NA	NA	NA	NA	NA	enriched	enriched	NA	NA	enriched	NA	NA	NA	NA	3	0
MATK	NA	NA	NA	NA	NA	NA	enriched	NA	NA	NA	NA	enriched	enriched	NA	NA	NA	NA	NA	NA	NA	NA	NA	3	0
MEF2C	NA	NA	enriched	NA	NA	NA	NA	NA	NA	NA	NA	NA	NA	NA	enriched	NA	NA	enriched	NA	NA	NA	NA	3	0
MEGF8	enriched	NA	NA	NA	NA	NA	enriched	NA	NA	NA	NA	NA	NA	NA	NA	NA	NA	NA	enriched	NA	NA	NA	3	0
METTL13	NA	NA	enriched	NA	NA	NA	enriched	NA	NA	NA	NA	NA	NA	enriched	NA	NA	NA	NA	NA	NA	NA	NA	3	0
METTL2B	enriched	NA	NA	NA	NA	NA	NA	NA	NA	NA	NA	NA	enriched	NA	NA	NA	enriched	NA	NA	NA	NA	NA	3	0
MTMR3	NA	NA	enriched	NA	NA	NA	NA	NA	NA	NA	NA	NA	NA	enriched	enriched	NA	NA	NA	NA	NA	NA	NA	3	0
MTMR6	NA	NA	enriched	NA	NA	NA	NA	NA	NA	NA	NA	NA	NA	NA	enriched	NA	NA	enriched	NA	NA	NA	NA	3	0
NBEAL1	NA	NA	enriched	NA	NA	enriched	NA	NA	NA	NA	NA	NA	enriched	NA	NA	NA	NA	NA	NA	NA	NA	NA	3	0
NCMAP	NA	enriched	enriched	NA	NA	enriched	NA	NA	NA	NA	NA	NA	NA	NA	NA	NA	NA	NA	NA	NA	NA	NA	3	0
NEK1	enriched	NA	NA	NA	enriched	NA	NA	NA	NA	NA	NA	NA	NA	NA	NA	NA	enriched	NA	NA	NA	NA	NA	3	0
NGF	NA	NA	NA	NA	NA	NA	NA	NA	NA	NA	NA	NA	NA	NA	NA	NA	enriched	NA	enriched	NA	NA	enriched	3	0
NOM1	enriched	NA	NA	enriched	NA	NA	NA	NA	NA	NA	NA	NA	NA	NA	NA	NA	NA	NA	NA	enriched	NA	NA	3	0
ORC1	NA	NA	enriched	NA	NA	NA	NA	NA	NA	enriched	NA	NA	enriched	NA	NA	NA	NA	NA	NA	NA	NA	NA	3	0
ORC4	NA	NA	enriched	NA	NA	NA	enriched	NA	NA	NA	NA	NA	enriched	NA	NA	NA	NA	NA	NA	NA	NA	NA	3	0
OSBPL1A	NA	NA	NA	NA	enriched	NA	NA	NA	NA	NA	NA	NA	NA	NA	NA	enriched	enriched	NA	NA	NA	NA	NA	3	0
PCBP3	NA	NA	NA	NA	enriched	NA	NA	NA	NA	NA	NA	NA	NA	NA	NA	enriched	enriched	NA	NA	NA	NA	NA	3	0
PRDM10	NA	NA	NA	enriched	NA	NA	NA	NA	NA	NA	NA	NA	NA	NA	enriched	NA	NA	NA	NA	NA	enriched	NA	3	0
PTH2R	NA	NA	enriched	NA	NA	NA	NA	enriched	NA	enriched	NA	NA	NA	NA	NA	NA	NA	NA	NA	NA	NA	NA	3	0
RANGAP1	NA	NA	NA	enriched	NA	NA	NA	NA	NA	NA	NA	NA	NA	enriched	enriched	NA	NA	NA	NA	NA	NA	NA	3	0
REEP1	NA	NA	enriched	NA	NA	NA	NA	NA	NA	NA	NA	NA	enriched	NA	NA	NA	NA	NA	enriched	NA	NA	NA	3	0
RHBDD1	NA	NA	enriched	NA	NA	NA	NA	NA	NA	NA	enriched	NA	NA	NA	NA	NA	NA	enriched	NA	NA	NA	NA	3	0
RNF141	NA	NA	enriched	NA	enriched	NA	NA	NA	NA	NA	NA	NA	NA	NA	NA	NA	NA	enriched	NA	NA	NA	NA	3	0
RNGTT	NA	NA	NA	NA	NA	NA	NA	NA	NA	NA	NA	NA	enriched	enriched	NA	NA	NA	enriched	NA	NA	NA	NA	3	0
SAA2-SAA4	NA	NA	NA	enriched	NA	enriched	NA	NA	NA	NA	NA	NA	NA	enriched	NA	NA	NA	NA	NA	NA	NA	NA	3	0
SGCB	enriched	NA	NA	NA	NA	NA	NA	NA	NA	NA	NA	NA	enriched	NA	NA	NA	NA	enriched	NA	NA	NA	NA	3	0
SH3PXD2B	NA	NA	NA	enriched	NA	NA	NA	NA	NA	enriched	enriched	NA	NA	NA	NA	NA	NA	NA	NA	NA	NA	NA	3	0
SHISAL2A	NA	NA	NA	NA	NA	enriched	NA	NA	NA	NA	NA	NA	NA	enriched	NA	NA	NA	NA	NA	enriched	NA	NA	3	0
SIDT1	NA	NA	enriched	NA	NA	NA	NA	NA	NA	NA	NA	enriched	NA	enriched	NA	NA	NA	NA	NA	NA	NA	NA	3	0
SIM2	NA	NA	NA	NA	NA	NA	enriched	NA	NA	NA	NA	NA	NA	enriched	NA	NA	NA	enriched	NA	NA	NA	NA	3	0
SLC25A16	enriched	NA	NA	enriched	NA	NA	NA	NA	NA	NA	NA	NA	NA	NA	NA	NA	NA	NA	NA	NA	NA	enriched	3	0
SLC33A1	NA	NA	enriched	NA	NA	NA	NA	NA	NA	NA	NA	NA	NA	enriched	enriched	NA	NA	NA	NA	NA	NA	NA	3	0
SLCO4A1	NA	NA	NA	NA	NA	NA	enriched	NA	NA	NA	NA	NA	NA	NA	NA	NA	NA	enriched	NA	NA	NA	enriched	3	0
SLMAP	NA	NA	enriched	NA	NA	enriched	NA	NA	NA	NA	NA	NA	NA	NA	enriched	NA	NA	NA	NA	NA	NA	NA	3	0
SMIM8	enriched	NA	enriched	NA	NA	enriched	NA	NA	NA	NA	NA	NA	NA	NA	NA	NA	NA	NA	NA	NA	NA	NA	3	0
SOS1	NA	NA	NA	enriched	enriched	NA	NA	NA	NA	NA	NA	NA	NA	NA	NA	NA	NA	NA	NA	NA	enriched	NA	3	0
SPATA1	NA	NA	NA	enriched	NA	enriched	NA	NA	NA	NA	NA	NA	NA	NA	NA	NA	NA	NA	NA	NA	enriched	NA	3	0
SRGAP3	enriched	NA	enriched	NA	NA	NA	NA	NA	NA	NA	NA	NA	NA	enriched	NA	NA	NA	NA	NA	NA	NA	NA	3	0
SVEP1	NA	NA	NA	NA	NA	NA	NA	NA	NA	NA	NA	enriched	NA	NA	enriched	NA	NA	enriched	NA	NA	NA	NA	3	0
TFAP2A	enriched	NA	NA	NA	NA	NA	NA	NA	NA	NA	NA	NA	NA	enriched	NA	enriched	NA	NA	NA	NA	NA	NA	3	0
TIAM1	NA	NA	NA	NA	NA	NA	NA	NA	NA	NA	enriched	NA	NA	enriched	NA	NA	NA	NA	NA	NA	NA	enriched	3	0
TMEM150C	NA	NA	enriched	NA	enriched	NA	NA	NA	NA	NA	NA	NA	NA	NA	NA	NA	enriched	NA	NA	NA	NA	NA	3	0
TRIM2	NA	NA	enriched	NA	enriched	NA	NA	NA	NA	NA	NA	NA	NA	NA	NA	NA	NA	NA	NA	NA	NA	enriched	3	0
TTC6	enriched	enriched	NA	NA	NA	NA	NA	NA	NA	NA	NA	enriched	NA	NA	NA	NA	NA	NA	NA	NA	NA	NA	3	0
UGT1A1	NA	NA	NA	enriched	NA	NA	enriched	NA	NA	NA	NA	NA	NA	NA	NA	NA	enriched	NA	NA	NA	NA	NA	3	0
UGT1A10	NA	NA	NA	enriched	NA	NA	enriched	NA	NA	NA	NA	NA	NA	NA	NA	NA	enriched	NA	NA	NA	NA	NA	3	0
WDR92	NA	NA	enriched	NA	NA	NA	NA	NA	NA	NA	NA	NA	NA	enriched	NA	NA	enriched	NA	NA	NA	NA	NA	3	0
XRCC4	NA	NA	enriched	NA	NA	NA	NA	NA	NA	enriched	NA	NA	NA	NA	NA	NA	NA	NA	NA	enriched	NA	NA	3	0
ZNF160	NA	NA	enriched	NA	NA	NA	NA	enriched	NA	enriched	NA	NA	NA	NA	NA	NA	NA	NA	NA	NA	NA	NA	3	0
ZNF500	NA	NA	NA	NA	NA	NA	NA	NA	NA	NA	NA	enriched	enriched	NA	enriched	NA	NA	NA	NA	NA	NA	NA	3	0
ZNF607	NA	NA	enriched	NA	NA	enriched	enriched	NA	NA	NA	NA	NA	NA	NA	NA	NA	NA	NA	NA	NA	NA	NA	3	0
AAK1	NA	NA	NA	NA	NA	NA	NA	NA	NA	NA	NA	NA	NA	NA	NA	NA	depleted	enriched	enriched	NA	NA	enriched	3	1
ACOX3	NA	NA	NA	NA	NA	NA	NA	enriched	NA	NA	NA	NA	enriched	NA	NA	NA	NA	NA	NA	enriched	depleted	NA	3	1
ADAMTS17	NA	NA	enriched	NA	NA	enriched	NA	depleted	NA	NA	NA	NA	enriched	NA	NA	NA	NA	NA	NA	NA	NA	NA	3	1
AKAP10	NA	NA	enriched	NA	NA	NA	NA	NA	NA	NA	NA	NA	NA	NA	enriched	NA	NA	enriched	NA	depleted	NA	NA	3	1
ALDH7A1	NA	depleted	NA	NA	NA	NA	enriched	NA	NA	NA	NA	NA	enriched	NA	enriched	NA	NA	NA	NA	NA	NA	NA	3	1
ANKLE2	NA	NA	NA	NA	NA	NA	enriched	NA	NA	NA	NA	NA	enriched	NA	NA	NA	NA	depleted	enriched	NA	NA	NA	3	1
ARHGAP28	NA	NA	NA	NA	NA	NA	NA	NA	depleted	NA	NA	NA	enriched	enriched	enriched	NA	NA	NA	NA	NA	NA	NA	3	1
ASCC1	NA	NA	NA	NA	enriched	NA	depleted	enriched	NA	NA	NA	NA	NA	NA	NA	enriched	NA	NA	NA	NA	NA	NA	3	1
ASIC2	NA	NA	NA	NA	enriched	NA	NA	NA	NA	NA	NA	NA	enriched	depleted	NA	NA	enriched	NA	NA	NA	NA	NA	3	1
CAPN13	NA	NA	depleted	NA	NA	NA	NA	NA	NA	NA	NA	NA	NA	enriched	NA	NA	enriched	NA	enriched	NA	NA	NA	3	1
CASP10	enriched	NA	NA	NA	NA	NA	NA	NA	NA	NA	NA	NA	NA	enriched	NA	NA	depleted	NA	NA	NA	enriched	NA	3	1
CCDC126	NA	enriched	enriched	NA	NA	NA	NA	NA	NA	NA	NA	NA	NA	NA	NA	NA	NA	depleted	NA	NA	enriched	NA	3	1
CCDC13	NA	NA	NA	NA	NA	NA	NA	NA	NA	NA	NA	enriched	enriched	NA	NA	NA	NA	depleted	NA	enriched	NA	NA	3	1
CD164	NA	NA	enriched	NA	NA	NA	NA	NA	NA	NA	NA	NA	NA	NA	enriched	NA	NA	enriched	NA	depleted	NA	NA	3	1
CLMN	NA	NA	NA	depleted	enriched	NA	NA	enriched	NA	NA	NA	NA	NA	NA	NA	NA	enriched	NA	NA	NA	NA	NA	3	1
CNOT3	NA	depleted	NA	NA	NA	NA	NA	NA	enriched	enriched	NA	NA	enriched	NA	NA	NA	NA	NA	NA	NA	NA	NA	3	1
COL4A5	NA	NA	enriched	depleted	NA	NA	NA	NA	NA	NA	NA	NA	NA	NA	enriched	NA	NA	enriched	NA	NA	NA	NA	3	1
CRB1	NA	NA	NA	NA	NA	NA	NA	NA	NA	NA	NA	NA	NA	NA	NA	NA	NA	enriched	NA	enriched	depleted	enriched	3	1
DBT	NA	NA	enriched	NA	NA	NA	NA	NA	NA	NA	NA	NA	NA	NA	enriched	NA	NA	enriched	NA	depleted	NA	NA	3	1
DCAF17	NA	NA	enriched	NA	NA	NA	NA	NA	NA	NA	NA	NA	NA	NA	enriched	NA	NA	NA	NA	depleted	NA	enriched	3	1
DHODH	NA	NA	depleted	enriched	NA	enriched	NA	NA	NA	NA	enriched	NA	NA	NA	NA	NA	NA	NA	NA	NA	NA	NA	3	1
DKKL1	NA	NA	NA	NA	NA	NA	NA	enriched	NA	NA	NA	NA	NA	NA	NA	enriched	enriched	depleted	NA	NA	NA	NA	3	1
DOK6	NA	NA	NA	NA	NA	depleted	NA	NA	NA	NA	NA	NA	enriched	enriched	NA	NA	NA	enriched	NA	NA	NA	NA	3	1
EPB41L4A	NA	NA	NA	NA	NA	NA	NA	enriched	NA	NA	NA	NA	NA	enriched	NA	NA	NA	NA	NA	enriched	NA	depleted	3	1
EVA1A	NA	NA	enriched	enriched	depleted	NA	NA	NA	NA	NA	NA	NA	NA	enriched	NA	NA	NA	NA	NA	NA	NA	NA	3	1
FAH	NA	NA	NA	NA	NA	NA	enriched	NA	NA	NA	NA	NA	enriched	NA	NA	NA	NA	NA	NA	depleted	enriched	NA	3	1
FAM122C	NA	NA	depleted	NA	NA	NA	enriched	enriched	NA	NA	NA	NA	NA	enriched	NA	NA	NA	NA	NA	NA	NA	NA	3	1
FAM193B	NA	NA	enriched	NA	NA	NA	NA	NA	NA	NA	NA	NA	NA	NA	enriched	NA	depleted	enriched	NA	NA	NA	NA	3	1
GALNT18	enriched	NA	NA	NA	NA	NA	depleted	NA	NA	NA	NA	NA	NA	NA	NA	NA	enriched	NA	NA	NA	enriched	NA	3	1
GATS	enriched	NA	NA	enriched	NA	NA	NA	NA	NA	depleted	NA	NA	NA	enriched	NA	NA	NA	NA	NA	NA	NA	NA	3	1
GLI3	NA	NA	enriched	NA	NA	NA	NA	NA	depleted	NA	NA	NA	enriched	NA	NA	enriched	NA	NA	NA	NA	NA	NA	3	1
GPC6	enriched	NA	NA	NA	NA	NA	NA	depleted	NA	NA	NA	NA	NA	NA	NA	NA	NA	enriched	NA	NA	NA	enriched	3	1
HBS1L	NA	NA	NA	NA	enriched	NA	NA	NA	NA	NA	NA	NA	NA	NA	NA	NA	enriched	enriched	NA	NA	depleted	NA	3	1
HDAC4	enriched	NA	NA	NA	enriched	NA	enriched	NA	NA	NA	NA	NA	NA	depleted	NA	NA	NA	NA	NA	NA	NA	NA	3	1
HMG20A	NA	NA	NA	NA	NA	NA	NA	enriched	enriched	NA	NA	NA	depleted	NA	NA	NA	NA	NA	NA	enriched	NA	NA	3	1
HS3ST1	enriched	NA	enriched	NA	NA	NA	NA	NA	NA	NA	NA	NA	NA	depleted	NA	enriched	NA	NA	NA	NA	NA	NA	3	1
IAH1	NA	NA	depleted	NA	enriched	NA	NA	enriched	NA	NA	NA	NA	NA	NA	NA	NA	enriched	NA	NA	NA	NA	NA	3	1
IDUA	NA	NA	NA	NA	enriched	NA	NA	enriched	NA	NA	NA	NA	NA	NA	depleted	NA	NA	NA	enriched	NA	NA	NA	3	1
LARP4	NA	NA	enriched	NA	NA	NA	NA	NA	NA	NA	NA	NA	NA	NA	enriched	NA	NA	enriched	NA	depleted	NA	NA	3	1
LMBRD2	NA	NA	NA	NA	NA	NA	NA	NA	NA	NA	NA	enriched	NA	NA	enriched	NA	NA	enriched	NA	depleted	NA	NA	3	1
LMO7	NA	NA	enriched	NA	NA	NA	NA	NA	NA	depleted	NA	NA	NA	NA	enriched	NA	NA	enriched	NA	NA	NA	NA	3	1
LRRC37A3	NA	NA	enriched	NA	NA	NA	NA	enriched	NA	NA	NA	NA	NA	NA	depleted	NA	NA	NA	NA	NA	enriched	NA	3	1
LYRM4	NA	NA	enriched	NA	NA	NA	NA	NA	NA	NA	NA	NA	NA	NA	depleted	NA	enriched	NA	NA	enriched	NA	NA	3	1
MAP3K15	enriched	NA	NA	enriched	NA	NA	NA	NA	NA	NA	NA	NA	NA	NA	NA	NA	depleted	enriched	NA	NA	NA	NA	3	1
ME3	NA	enriched	NA	NA	NA	enriched	NA	NA	NA	NA	NA	NA	NA	NA	NA	NA	depleted	enriched	NA	NA	NA	NA	3	1
METTL15	enriched	NA	enriched	NA	NA	NA	NA	depleted	NA	NA	NA	NA	NA	NA	NA	NA	enriched	NA	NA	NA	NA	NA	3	1
MKS1	NA	NA	enriched	NA	enriched	NA	NA	enriched	NA	NA	NA	NA	NA	NA	NA	NA	NA	depleted	NA	NA	NA	NA	3	1
MLYCD	NA	NA	NA	enriched	NA	NA	NA	depleted	NA	NA	NA	NA	NA	NA	enriched	NA	NA	NA	NA	NA	enriched	NA	3	1
MSL3	NA	NA	depleted	NA	NA	NA	enriched	enriched	NA	NA	NA	NA	NA	NA	NA	NA	NA	enriched	NA	NA	NA	NA	3	1
NCOR1	NA	NA	NA	NA	NA	NA	NA	depleted	NA	NA	enriched	NA	NA	NA	enriched	NA	NA	enriched	NA	NA	NA	NA	3	1
NEBL	enriched	NA	NA	depleted	NA	NA	NA	NA	NA	NA	NA	NA	NA	enriched	NA	NA	NA	NA	NA	enriched	NA	NA	3	1
NOXRED1	NA	NA	NA	NA	NA	NA	NA	enriched	NA	NA	NA	NA	NA	enriched	NA	NA	NA	NA	NA	enriched	depleted	NA	3	1
NUDT5	NA	NA	enriched	NA	NA	NA	NA	NA	NA	NA	NA	enriched	enriched	NA	NA	NA	NA	NA	NA	NA	depleted	NA	3	1
NXNL2	NA	NA	depleted	NA	NA	NA	NA	enriched	NA	enriched	NA	NA	NA	NA	NA	NA	NA	enriched	NA	NA	NA	NA	3	1
PCNX1	NA	NA	NA	NA	NA	NA	enriched	NA	NA	NA	NA	NA	enriched	NA	depleted	NA	NA	enriched	NA	NA	NA	NA	3	1
PCYOX1	NA	NA	enriched	NA	NA	NA	NA	NA	NA	NA	NA	NA	NA	NA	enriched	NA	NA	enriched	NA	depleted	NA	NA	3	1
PER2	NA	NA	enriched	NA	NA	NA	NA	NA	NA	NA	NA	NA	NA	NA	enriched	NA	depleted	enriched	NA	NA	NA	NA	3	1
PLCH1	NA	NA	NA	NA	NA	NA	NA	NA	NA	NA	NA	NA	enriched	depleted	NA	NA	NA	NA	NA	enriched	NA	enriched	3	1
PPARG	NA	NA	NA	NA	NA	NA	enriched	NA	NA	NA	NA	NA	NA	NA	enriched	NA	NA	enriched	NA	NA	NA	depleted	3	1
PPP1CB	NA	NA	enriched	NA	NA	NA	NA	depleted	NA	NA	NA	NA	NA	NA	enriched	NA	NA	enriched	NA	NA	NA	NA	3	1
PPP1R1C	NA	NA	enriched	NA	NA	NA	NA	enriched	NA	enriched	NA	NA	NA	depleted	NA	NA	NA	NA	NA	NA	NA	NA	3	1
PRKCQ	NA	NA	NA	NA	NA	NA	NA	NA	NA	enriched	NA	NA	NA	depleted	NA	NA	NA	NA	NA	enriched	enriched	NA	3	1
PRPS2	NA	NA	enriched	NA	NA	NA	NA	NA	NA	NA	NA	NA	NA	NA	enriched	NA	NA	enriched	NA	NA	NA	depleted	3	1
PSMA3	NA	NA	NA	NA	NA	NA	NA	depleted	NA	NA	NA	NA	enriched	enriched	NA	NA	NA	NA	NA	NA	NA	enriched	3	1
PTPRA	NA	NA	enriched	NA	enriched	NA	NA	NA	NA	NA	NA	NA	NA	NA	depleted	NA	enriched	NA	NA	NA	NA	NA	3	1
PYROXD2	NA	NA	NA	NA	NA	enriched	NA	NA	NA	NA	NA	NA	NA	depleted	NA	NA	NA	NA	enriched	NA	NA	enriched	3	1
RASA1	NA	NA	NA	enriched	NA	NA	NA	enriched	NA	NA	NA	NA	NA	NA	enriched	NA	NA	NA	NA	NA	depleted	NA	3	1
RB1	NA	NA	NA	NA	NA	NA	NA	depleted	NA	NA	NA	NA	NA	enriched	enriched	NA	NA	enriched	NA	NA	NA	NA	3	1
RBM15	NA	NA	NA	NA	NA	NA	NA	enriched	NA	NA	NA	NA	enriched	NA	NA	NA	NA	enriched	NA	depleted	NA	NA	3	1
RFC2	NA	NA	NA	depleted	NA	NA	NA	NA	NA	NA	NA	enriched	enriched	enriched	NA	NA	NA	NA	NA	NA	NA	NA	3	1
RFX3	NA	NA	enriched	NA	NA	NA	NA	NA	NA	NA	NA	NA	enriched	NA	NA	NA	NA	depleted	NA	NA	NA	enriched	3	1
RNF146	NA	enriched	NA	enriched	NA	NA	NA	NA	NA	NA	NA	NA	NA	NA	NA	NA	NA	enriched	NA	NA	NA	depleted	3	1
RORA	NA	enriched	NA	NA	NA	NA	NA	NA	NA	NA	NA	NA	enriched	NA	NA	NA	NA	depleted	NA	NA	NA	enriched	3	1
SETD5	NA	NA	NA	NA	NA	NA	NA	NA	depleted	NA	NA	enriched	enriched	NA	enriched	NA	NA	NA	NA	NA	NA	NA	3	1
SETMAR	enriched	NA	NA	NA	NA	NA	NA	NA	NA	NA	NA	NA	NA	NA	NA	enriched	NA	depleted	NA	NA	NA	enriched	3	1
SGCD	NA	NA	NA	NA	NA	NA	NA	NA	NA	NA	NA	NA	enriched	NA	NA	NA	enriched	depleted	NA	enriched	NA	NA	3	1
SGMS1	NA	NA	enriched	NA	NA	NA	NA	NA	NA	NA	NA	NA	NA	NA	enriched	NA	NA	enriched	NA	depleted	NA	NA	3	1
SLC16A10	NA	NA	NA	enriched	NA	NA	NA	depleted	NA	NA	NA	NA	NA	enriched	enriched	NA	NA	NA	NA	NA	NA	NA	3	1
SLC25A43	NA	NA	enriched	NA	NA	NA	NA	NA	NA	NA	NA	NA	NA	NA	enriched	NA	NA	enriched	NA	NA	NA	depleted	3	1
SLC25A48	NA	depleted	NA	NA	enriched	NA	NA	NA	enriched	NA	NA	NA	NA	NA	NA	NA	enriched	NA	NA	NA	NA	NA	3	1
SLC30A10	NA	NA	depleted	NA	NA	enriched	NA	NA	NA	NA	NA	NA	NA	NA	enriched	NA	enriched	NA	NA	NA	NA	NA	3	1
STK17B	NA	NA	enriched	enriched	NA	NA	NA	NA	NA	NA	NA	NA	NA	NA	depleted	NA	NA	enriched	NA	NA	NA	NA	3	1
STON1	enriched	NA	NA	NA	NA	enriched	NA	NA	NA	enriched	NA	NA	NA	depleted	NA	NA	NA	NA	NA	NA	NA	NA	3	1
TBC1D20	NA	NA	enriched	depleted	NA	NA	NA	NA	NA	NA	NA	enriched	enriched	NA	NA	NA	NA	NA	NA	NA	NA	NA	3	1
TCTN3	NA	NA	NA	NA	enriched	NA	NA	NA	NA	NA	NA	NA	NA	NA	NA	NA	enriched	enriched	NA	depleted	NA	NA	3	1
TFB1M	NA	NA	depleted	NA	NA	enriched	NA	NA	NA	NA	NA	NA	NA	NA	enriched	NA	NA	NA	NA	enriched	NA	NA	3	1
TMC1	enriched	NA	enriched	NA	NA	depleted	NA	NA	NA	NA	NA	NA	NA	NA	NA	enriched	NA	NA	NA	NA	NA	NA	3	1
TP53I11	NA	NA	enriched	NA	enriched	NA	NA	NA	NA	NA	NA	NA	NA	NA	NA	NA	enriched	NA	NA	NA	depleted	NA	3	1
TRAM1	NA	NA	enriched	depleted	NA	NA	NA	NA	NA	NA	NA	NA	NA	NA	enriched	NA	NA	enriched	NA	NA	NA	NA	3	1
TRMT61B	NA	NA	depleted	NA	NA	NA	NA	NA	NA	NA	NA	NA	NA	NA	enriched	NA	enriched	NA	NA	NA	enriched	NA	3	1
TUBD1	NA	NA	NA	NA	NA	NA	NA	NA	NA	NA	NA	NA	NA	enriched	enriched	NA	NA	enriched	NA	depleted	NA	NA	3	1
TWIST1	NA	enriched	depleted	NA	NA	NA	NA	NA	NA	NA	NA	NA	NA	NA	NA	NA	NA	enriched	NA	NA	enriched	NA	3	1
TYK2	NA	NA	NA	NA	enriched	NA	NA	NA	NA	NA	NA	NA	NA	enriched	NA	NA	enriched	NA	NA	NA	depleted	NA	3	1
YY1	NA	NA	enriched	depleted	enriched	NA	NA	NA	NA	NA	NA	NA	NA	NA	NA	NA	NA	enriched	NA	NA	NA	NA	3	1
ZNF23	NA	NA	NA	enriched	NA	NA	NA	depleted	NA	NA	NA	NA	NA	NA	NA	NA	NA	NA	enriched	NA	enriched	NA	3	1
ZNF28	NA	NA	NA	NA	NA	NA	NA	NA	NA	NA	NA	NA	NA	enriched	NA	NA	NA	depleted	NA	enriched	enriched	NA	3	1
ZNF292	NA	NA	NA	NA	NA	NA	NA	NA	NA	NA	NA	NA	NA	NA	enriched	NA	depleted	enriched	NA	NA	enriched	NA	3	1
ZNF365	NA	NA	NA	NA	NA	NA	NA	NA	depleted	enriched	NA	enriched	enriched	NA	NA	NA	NA	NA	NA	NA	NA	NA	3	1
ZNF530	NA	NA	NA	NA	NA	depleted	NA	enriched	NA	enriched	NA	NA	NA	enriched	NA	NA	NA	NA	NA	NA	NA	NA	3	1
ADGRF3	NA	NA	NA	NA	NA	NA	NA	NA	NA	enriched	NA	NA	NA	depleted	depleted	enriched	enriched	NA	NA	NA	NA	NA	3	2
ANKRD42	NA	NA	NA	enriched	NA	NA	NA	NA	depleted	NA	NA	NA	NA	NA	enriched	NA	NA	enriched	NA	NA	depleted	NA	3	2
ARID4B	NA	NA	depleted	NA	NA	NA	NA	NA	NA	NA	NA	NA	NA	NA	enriched	NA	NA	enriched	enriched	depleted	NA	NA	3	2
ATE1	NA	NA	enriched	NA	NA	NA	NA	depleted	NA	NA	NA	NA	NA	NA	enriched	NA	NA	enriched	NA	depleted	NA	NA	3	2
BFAR	NA	depleted	NA	enriched	enriched	depleted	NA	NA	NA	NA	NA	NA	NA	NA	enriched	NA	NA	NA	NA	NA	NA	NA	3	2
BNIP3	NA	NA	NA	NA	depleted	enriched	NA	NA	NA	NA	NA	NA	NA	NA	NA	NA	NA	NA	enriched	NA	enriched	depleted	3	2
BPHL	enriched	enriched	NA	NA	NA	NA	NA	depleted	NA	NA	NA	NA	NA	depleted	NA	NA	enriched	NA	NA	NA	NA	NA	3	2
C16orf71	NA	NA	NA	NA	NA	NA	NA	NA	NA	NA	NA	enriched	enriched	depleted	NA	NA	NA	NA	NA	NA	depleted	enriched	3	2
C2CD2	enriched	NA	NA	enriched	NA	NA	enriched	NA	depleted	depleted	NA	NA	NA	NA	NA	NA	NA	NA	NA	NA	NA	NA	3	2
C2orf27A	NA	NA	NA	NA	NA	NA	NA	enriched	depleted	NA	NA	NA	NA	enriched	NA	NA	NA	enriched	NA	depleted	NA	NA	3	2
CAMK2D	NA	NA	NA	NA	NA	NA	enriched	NA	NA	NA	NA	NA	enriched	depleted	NA	enriched	NA	NA	NA	depleted	NA	NA	3	2
CAPRIN1	NA	NA	enriched	NA	NA	NA	NA	NA	NA	NA	NA	NA	enriched	depleted	enriched	NA	NA	NA	depleted	NA	NA	NA	3	2
CDH20	NA	NA	NA	depleted	NA	NA	NA	enriched	NA	enriched	NA	NA	NA	NA	NA	enriched	NA	depleted	NA	NA	NA	NA	3	2
CEP44	NA	NA	NA	NA	NA	NA	enriched	enriched	enriched	NA	NA	NA	NA	NA	depleted	NA	NA	NA	depleted	NA	NA	NA	3	2
CHD2	NA	NA	enriched	NA	NA	NA	NA	depleted	depleted	NA	NA	NA	NA	NA	enriched	NA	NA	NA	NA	NA	enriched	NA	3	2
CNOT6	NA	enriched	NA	depleted	enriched	NA	NA	enriched	NA	NA	NA	NA	NA	NA	NA	NA	NA	depleted	NA	NA	NA	NA	3	2
COLGALT2	NA	NA	NA	enriched	NA	NA	NA	NA	depleted	NA	NA	depleted	enriched	enriched	NA	NA	NA	NA	NA	NA	NA	NA	3	2
CRIM1	NA	NA	NA	NA	NA	NA	NA	depleted	NA	NA	NA	NA	enriched	NA	enriched	NA	NA	enriched	NA	NA	depleted	NA	3	2
CSMD2	NA	NA	NA	NA	NA	NA	NA	NA	depleted	NA	NA	NA	NA	enriched	enriched	NA	enriched	NA	NA	NA	depleted	NA	3	2
DDX49	enriched	NA	depleted	NA	enriched	NA	NA	enriched	NA	NA	NA	NA	NA	NA	NA	NA	NA	NA	NA	NA	depleted	NA	3	2
DIDO1	NA	NA	NA	enriched	enriched	NA	NA	NA	NA	NA	NA	NA	NA	NA	enriched	NA	NA	depleted	NA	NA	depleted	NA	3	2
DNAJB14	enriched	NA	NA	NA	NA	NA	NA	NA	NA	depleted	NA	NA	NA	NA	enriched	NA	NA	enriched	NA	depleted	NA	NA	3	2
DNM1L	NA	NA	NA	enriched	NA	NA	NA	NA	NA	NA	NA	NA	depleted	enriched	depleted	NA	NA	enriched	NA	NA	NA	NA	3	2
FASTKD2	NA	NA	NA	depleted	NA	NA	NA	NA	NA	NA	NA	enriched	enriched	NA	depleted	NA	NA	enriched	NA	NA	NA	NA	3	2
FLT4	NA	NA	enriched	NA	NA	NA	NA	NA	NA	enriched	NA	NA	NA	NA	depleted	NA	depleted	NA	NA	NA	enriched	NA	3	2
FPGT	NA	NA	NA	NA	NA	NA	NA	depleted	NA	NA	NA	NA	NA	enriched	enriched	NA	NA	enriched	depleted	NA	NA	NA	3	2
FZD6	NA	NA	enriched	NA	NA	NA	NA	NA	NA	NA	NA	NA	NA	NA	NA	NA	NA	enriched	enriched	depleted	NA	depleted	3	2
GABPB1	NA	NA	enriched	NA	NA	NA	NA	NA	NA	NA	NA	NA	NA	enriched	depleted	NA	depleted	enriched	NA	NA	NA	NA	3	2
GPR35	NA	NA	depleted	NA	enriched	NA	NA	NA	NA	NA	NA	NA	NA	NA	NA	NA	enriched	enriched	NA	depleted	NA	NA	3	2
HPS3	NA	NA	NA	NA	NA	NA	enriched	enriched	NA	NA	NA	NA	NA	depleted	depleted	NA	NA	NA	NA	NA	enriched	NA	3	2
HSF5	enriched	NA	NA	NA	NA	NA	NA	NA	NA	NA	NA	NA	enriched	enriched	depleted	NA	NA	NA	NA	NA	depleted	NA	3	2
ILF3	enriched	NA	NA	NA	NA	enriched	NA	depleted	NA	NA	NA	NA	NA	NA	depleted	NA	NA	enriched	NA	NA	NA	NA	3	2
ITGB1BP1	NA	NA	NA	depleted	enriched	NA	NA	NA	NA	enriched	NA	NA	NA	depleted	NA	NA	enriched	NA	NA	NA	NA	NA	3	2
KBTBD3	enriched	NA	NA	depleted	NA	NA	NA	enriched	NA	NA	NA	NA	enriched	NA	depleted	NA	NA	NA	NA	NA	NA	NA	3	2
LARS	NA	NA	NA	NA	NA	NA	NA	depleted	NA	depleted	NA	NA	enriched	NA	enriched	NA	NA	enriched	NA	NA	NA	NA	3	2
LNPEP	NA	NA	NA	depleted	NA	NA	NA	enriched	NA	NA	NA	NA	NA	NA	depleted	enriched	NA	NA	NA	NA	NA	enriched	3	2
LRP10	NA	NA	enriched	NA	NA	NA	NA	NA	NA	enriched	NA	NA	NA	NA	depleted	NA	NA	depleted	NA	enriched	NA	NA	3	2
MALT1	NA	NA	enriched	depleted	NA	NA	NA	NA	NA	NA	NA	NA	NA	NA	enriched	NA	NA	enriched	NA	depleted	NA	NA	3	2
MAP3K5	NA	NA	enriched	depleted	NA	NA	NA	NA	NA	NA	NA	NA	NA	NA	enriched	NA	NA	enriched	NA	depleted	NA	NA	3	2
MCU	NA	NA	enriched	depleted	NA	NA	NA	NA	NA	NA	NA	NA	NA	NA	enriched	NA	NA	enriched	NA	depleted	NA	NA	3	2
MICAL3	enriched	NA	enriched	NA	NA	NA	NA	depleted	NA	NA	NA	NA	NA	enriched	depleted	NA	NA	NA	NA	NA	NA	NA	3	2
MLPH	NA	NA	NA	depleted	NA	enriched	NA	NA	NA	NA	NA	enriched	NA	depleted	NA	enriched	NA	NA	NA	NA	NA	NA	3	2
MMS22L	NA	NA	depleted	NA	NA	enriched	NA	NA	depleted	NA	NA	NA	NA	enriched	NA	NA	NA	NA	NA	NA	NA	enriched	3	2
MTBP	NA	NA	NA	NA	NA	NA	NA	enriched	NA	NA	NA	enriched	NA	NA	depleted	enriched	NA	NA	NA	NA	depleted	NA	3	2
NEDD9	NA	NA	NA	NA	NA	NA	NA	depleted	NA	NA	NA	enriched	enriched	enriched	depleted	NA	NA	NA	NA	NA	NA	NA	3	2
NID1	NA	NA	NA	NA	NA	NA	NA	NA	NA	NA	NA	NA	NA	enriched	enriched	NA	depleted	enriched	NA	depleted	NA	NA	3	2
NTRK2	NA	depleted	NA	enriched	NA	NA	NA	NA	NA	NA	NA	NA	NA	NA	depleted	NA	NA	enriched	NA	NA	NA	enriched	3	2
NUBPL	NA	NA	NA	NA	NA	NA	NA	depleted	NA	NA	NA	NA	NA	enriched	enriched	NA	NA	enriched	NA	depleted	NA	NA	3	2
NUP160	NA	NA	enriched	NA	NA	NA	NA	NA	depleted	depleted	enriched	NA	NA	NA	enriched	NA	NA	NA	NA	NA	NA	NA	3	2
PANK1	NA	NA	NA	NA	enriched	NA	NA	depleted	NA	NA	NA	NA	NA	NA	NA	NA	enriched	enriched	NA	NA	depleted	NA	3	2
PCBD1	NA	NA	depleted	NA	NA	NA	NA	NA	NA	NA	NA	NA	NA	enriched	enriched	NA	NA	depleted	NA	NA	NA	enriched	3	2
PCGF3	enriched	NA	NA	NA	NA	depleted	NA	NA	depleted	NA	enriched	NA	NA	NA	NA	NA	enriched	NA	NA	NA	NA	NA	3	2
POLE2	NA	NA	NA	depleted	NA	enriched	NA	NA	NA	NA	NA	NA	NA	enriched	NA	NA	NA	depleted	NA	NA	NA	enriched	3	2
RAB3GAP1	enriched	NA	enriched	NA	NA	NA	NA	NA	NA	depleted	NA	NA	NA	NA	depleted	enriched	NA	NA	NA	NA	NA	NA	3	2
RANBP9	NA	NA	enriched	depleted	NA	depleted	NA	NA	NA	NA	NA	NA	NA	NA	enriched	NA	NA	enriched	NA	NA	NA	NA	3	2
RAP1GDS1	NA	NA	NA	NA	NA	enriched	NA	NA	NA	depleted	NA	NA	NA	NA	enriched	NA	NA	enriched	NA	NA	NA	depleted	3	2
RBBP6	NA	NA	enriched	enriched	NA	NA	NA	NA	NA	NA	NA	NA	NA	NA	NA	NA	depleted	enriched	NA	depleted	NA	NA	3	2
RBFOX2	enriched	NA	enriched	NA	NA	NA	NA	NA	NA	NA	NA	NA	NA	NA	depleted	NA	NA	depleted	NA	NA	NA	enriched	3	2
RSF1	NA	NA	NA	NA	NA	NA	NA	NA	NA	NA	enriched	NA	NA	NA	NA	NA	NA	depleted	NA	enriched	depleted	enriched	3	2
SEC16A	NA	NA	enriched	NA	depleted	NA	NA	NA	NA	NA	NA	NA	NA	NA	enriched	NA	NA	enriched	NA	NA	NA	depleted	3	2
SEMA6A	NA	NA	enriched	NA	NA	NA	NA	NA	NA	depleted	NA	NA	NA	NA	enriched	NA	NA	enriched	NA	depleted	NA	NA	3	2
SHISA9	NA	enriched	NA	NA	enriched	NA	NA	depleted	NA	NA	NA	NA	NA	NA	depleted	NA	NA	enriched	NA	NA	NA	NA	3	2
SLC1A3	NA	depleted	NA	NA	NA	NA	NA	NA	NA	depleted	NA	NA	NA	enriched	enriched	NA	NA	enriched	NA	NA	NA	NA	3	2
STAMBP	NA	NA	NA	NA	NA	NA	NA	enriched	NA	NA	NA	NA	NA	enriched	depleted	NA	depleted	enriched	NA	NA	NA	NA	3	2
TET1	NA	NA	enriched	NA	enriched	NA	NA	NA	NA	NA	NA	NA	depleted	depleted	NA	NA	enriched	NA	NA	NA	NA	NA	3	2
TMEM260	enriched	NA	NA	NA	NA	depleted	NA	NA	depleted	NA	NA	NA	NA	NA	enriched	NA	NA	enriched	NA	NA	NA	NA	3	2
TMSB15B	NA	NA	NA	NA	NA	NA	NA	NA	depleted	NA	NA	NA	enriched	enriched	NA	NA	NA	depleted	NA	NA	NA	enriched	3	2
TOP1	NA	NA	enriched	NA	NA	NA	NA	NA	NA	NA	NA	NA	NA	NA	enriched	NA	NA	enriched	NA	depleted	NA	depleted	3	2
TREM1	NA	NA	enriched	NA	NA	NA	NA	NA	NA	NA	NA	depleted	depleted	enriched	enriched	NA	NA	NA	NA	NA	NA	NA	3	2
TRHDE	enriched	NA	NA	NA	NA	NA	NA	depleted	depleted	NA	NA	NA	NA	NA	NA	NA	NA	NA	NA	NA	enriched	enriched	3	2
TRIB2	NA	NA	enriched	NA	NA	NA	NA	enriched	NA	NA	NA	NA	NA	enriched	depleted	NA	NA	depleted	NA	NA	NA	NA	3	2
[truncated: 2,493 more rows]

## Sheet: S3
Table S3: Functional enrichment of pan-cancer (A) tumor enriched and (B) depleted IPA genes (tumor vs. paired normal).
(A)
Term	P.value	Adjusted.P.value	Combined.Score
cilium assembly (GO:0060271)	1.49895e-08	5.37974e-05	46.0044
establishment of protein localization to membrane (GO:0090150)	1.32377e-06	0.0023755	52.2758
cilium organization (GO:0044782)	6.82935e-06	0.00817018	29.4838
double-strand break repair via homologous recombination (GO:0000724)	1.71488e-05	0.0153868	39.1116
plasma membrane bounded cell projection assembly (GO:0120031)	4.32024e-05	0.0287564	21.4799
ciliary basal body-plasma membrane docking (GO:0097711)	5.51076e-05	0.0287564	29.3643
regulation of dendrite morphogenesis (GO:0048814)	5.60866e-05	0.0287564	43.8
recombinational repair (GO:0000725)	8.44091e-05	0.037868	31.5421
fatty acid beta-oxidation using acyl-CoA oxidase (GO:0033540)	0.000120363	0.047998	84.0723
cellular response to DNA damage stimulus (GO:0006974)	0.00021592	0.0774939	15.4906
regulation of translation (GO:0006417)	0.000332705	0.108553	16.2991
double-strand break repair (GO:0006302)	0.000403219	0.120596	18.0165
epithelial cilium movement involved in determination of left/right asymmetry (GO:0060287)	0.000442288	0.122106	102.687
epithelial cilium movement (GO:0003351)	0.00102493	0.262748	48.822
organelle assembly (GO:0070925)	0.00138299	0.321966	10.8343
phosphorylation (GO:0016310)	0.00143535	0.321966	10.6945
regulation of transcription, DNA-templated (GO:0006355)	0.00196858	0.415602	8.04715
DNA repair (GO:0006281)	0.00319145	0.61289	9.6368
Golgi to plasma membrane protein transport (GO:0043001)	0.00324461	0.61289	25.1099
nucleic acid phosphodiester bond hydrolysis (GO:0090305)	0.00344073	0.617439	14.3475
double-strand break repair (GO:0006302)	0.0016733	0.258617	14.523
double-strand break repair via homologous recombination (GO:0000724)	0.00178699	0.266325	18.2676
recombinational repair (GO:0000725)	0.00208599	0.300166	17.4563
positive regulation of DNA repair (GO:0045739)	0.0344119	0.823134	9.34453
transcription-coupled nucleotide-excision repair (GO:0006283)	0.0458124	0.881206	6.72574
regulation of DNA repair (GO:0006282)	0.0536429	0.925008	5.83364
nucleotide-excision repair (GO:0006289)	0.0557546	0.940982	5.27845
double-strand break repair via nonhomologous end joining (GO:0006303)	0.19842	0.999996	3.43446
non-recombinational repair (GO:0000726)	0.19842	0.999996	3.43446
postreplication repair (GO:0006301)	0.26923	0.999996	2.32163
nucleotide-excision repair, DNA gap filling (GO:0006297)	0.293485	0.999996	2.05474
regulation of double-strand break repair (GO:2000779)	0.342275	0.999996	1.62566
single strand break repair (GO:0000012)	0.40659	0.999996	1.36431
negative regulation of DNA repair (GO:0045738)	0.513657	0.999996	1.00974
pyrimidine dimer repair (GO:0006290)	0.513657	0.999996	1.00974
base-excision repair, AP site formation (GO:0006285)	0.513657	0.999996	1.00974
nucleotide-excision repair, DNA damage removal (GO:0000718)	0.550807	0.999996	0.665985
regulation of double-strand break repair via homologous recombination (GO:0010569)	0.690104	0.999996	0.327851
DNA synthesis involved in DNA repair (GO:0000731)	0.690104	0.999996	0.327851
base-excision repair (GO:0006284)	0.887489	0.999996	0.0632411
(B)
Term	P.value	Adjusted.P.value	Combined.Score
RNA splicing (GO:0008380)	5.49044e-06	0.0168611	30.9504
nucleocytoplasmic transport (GO:0006913)	1.71169e-05	0.0213605	31.5689
nuclear transport (GO:0051169)	2.56108e-05	0.0213605	29.5802
purine ribonucleoside monophosphate metabolic process (GO:0009167)	3.2973e-05	0.0213605	22.6829
purine nucleoside monophosphate metabolic process (GO:0009126)	3.47777e-05	0.0213605	22.5029
ATP metabolic process (GO:0046034)	4.47499e-05	0.0229045	22.198
ribonucleoside monophosphate metabolic process (GO:0009161)	6.80035e-05	0.0277773	20.2975
purine ribonucleoside monophosphate catabolic process (GO:0009169)	0.000107751	0.0277773	20.3296
ribonucleoside monophosphate catabolic process (GO:0009158)	0.000107751	0.0277773	20.3296
mRNA transport (GO:0051028)	0.000111059	0.0277773	28.4089
purine nucleoside monophosphate catabolic process (GO:0009128)	0.00011383	0.0277773	20.1395
nucleoside monophosphate metabolic process (GO:0009123)	0.000116301	0.0277773	18.611
mRNA processing (GO:0006397)	0.000125946	0.0277773	18.7846
nucleoside monophosphate catabolic process (GO:0009125)	0.00012692	0.0277773	19.7651
mRNA splicing, via spliceosome (GO:0000398)	0.000147024	0.0277773	24.1708
RNA splicing, via transesterification reactions with bulged adenosine as nucleophile (GO:0000377)	0.000147024	0.0277773	24.1708
RNA transport (GO:0050658)	0.000186997	0.0277773	24.5821
nucleic acid transport (GO:0050657)	0.000186997	0.0277773	24.5821
establishment of RNA localization (GO:0051236)	0.000186997	0.0277773	24.5821
ATP catabolic process (GO:0006200)	0.000188406	0.0277773	18.7017
RNA splicing, via transesterification reactions (GO:0000375)	0.000248294	0.0346595	21.7571
regulation of RNA splicing (GO:0043484)	0.00537841	0.317636	15.6808
RNA 3'-end processing (GO:0031123)	0.00194233	0.156971	18.0022
mRNA 3'-end processing (GO:0031124)	0.00481793	0.31106	15.1891

## Sheet: S4A
Table S4A: Summary of genes and samples truncated by truncating mutations or IPAs in human tumor tissues. TR: truncating mutations, DDR: DNA damage repair genes.
cancer	IPA_patient	IPA_gene	TR_patient	TR_gene	Both_in_patient	Both_in_gene	IPA_DDR_patient	IPA_DDR_gene	TR_DDR_patient	TR_DDR_gene	Both_in_DDR_patient	Both_in_DDR_gene
BLCA	19	3663	19	319	10	17	19	88	7	9	3	3
BRCA	112	4709	97	756	14	53	112	108	10	14	1	2
CESC	3	2206	1	5	0	0	3	56	0	0	0	0
CHOL	9	1918	8	28	1	1	9	50	0	0	0	0
COAD	41	3609	29	448	13	30	41	92	8	8	1	1
ESCA	8	2244	7	74	3	4	8	52	3	3	1	1
HNSC	42	3998	42	418	14	26	42	96	16	10	1	1
KICH	23	3279	18	74	2	2	23	81	2	1	1	1
KIRC	72	3602	60	193	4	6	72	81	9	4	0	0
KIRP	31	3351	27	185	8	9	31	76	3	5	0	0
LIHC	50	3477	46	221	6	6	50	85	5	2	0	0
LUAD	57	4060	53	810	26	41	57	96	12	10	0	0
LUSC	49	4096	45	569	22	34	49	97	8	6	2	2
PAAD	4	1327	3	9	0	0	4	31	0	0	0	0
PCPG	3	1386	1	1	0	0	3	41	0	0	0	0
PRAD	46	3937	35	99	2	2	46	99	0	0	0	0
READ	9	1887	8	41	0	0	9	46	0	0	0	0
SARC	2	1447	1	5	1	1	2	42	0	0	0	0
STAD	27	4052	25	292	11	19	27	89	6	5	0	0
THCA	58	4014	21	39	2	2	58	91	0	0	0	0
THYM	2	615	0	0	0	0	2	14	0	0	0	0
UCEC	23	3480	17	2527	9	175	23	84	5	38	2	5

## Sheet: S4B
Table S4B: List of genes and samples truncated by IPA, truncating mutations or both. TR: truncating mutations, DDR: DNA damage repair genes, TSG: tumor suppressor genes.
Tumor_Sample_Barcode	gene_symbol	cancer_type	IPA	TR	IPA_TR	DDR	TSG
TCGA-BL-A13J-01	ACO2	BLCA	Yes	No	No	No	No
TCGA-BL-A13J-01	ACYP2	BLCA	Yes	No	No	No	No
TCGA-BL-A13J-01	ADGRL3	BLCA	Yes	No	No	No	No
TCGA-BL-A13J-01	ADK	BLCA	Yes	No	No	No	No
TCGA-BL-A13J-01	AGO3	BLCA	Yes	No	No	No	No
TCGA-BL-A13J-01	AKAP6	BLCA	Yes	No	No	No	No
TCGA-BL-A13J-01	ALPK1	BLCA	Yes	No	No	No	No
TCGA-BL-A13J-01	AMY2B	BLCA	Yes	No	No	No	No
TCGA-BL-A13J-01	ANKDD1A	BLCA	Yes	No	No	No	No
TCGA-BL-A13J-01	ANKRD12	BLCA	Yes	No	No	No	No
TCGA-BL-A13J-01	AP4E1	BLCA	Yes	No	No	No	No
TCGA-BL-A13J-01	APLF	BLCA	Yes	No	No	Yes	No
TCGA-BL-A13J-01	APOPT1	BLCA	Yes	No	No	No	No
TCGA-BL-A13J-01	ARMC8	BLCA	Yes	No	No	No	No
TCGA-BL-A13J-01	ARMCX4	BLCA	Yes	No	No	No	No
TCGA-BL-A13J-01	ASXL1	BLCA	Yes	No	No	No	Yes
TCGA-BL-A13J-01	ATM	BLCA	Yes	No	No	Yes	Yes
TCGA-BL-A13J-01	ATP11B	BLCA	Yes	No	No	No	No
TCGA-BL-A13J-01	ATP2A2	BLCA	Yes	No	No	No	No
TCGA-BL-A13J-01	BBS9	BLCA	Yes	No	No	No	No
TCGA-BL-A13J-01	BCAP29	BLCA	Yes	No	No	No	No
TCGA-BL-A13J-01	BICD1	BLCA	Yes	No	No	No	No
TCGA-BL-A13J-01	BIVM-ERCC5	BLCA	Yes	No	No	No	No
TCGA-BL-A13J-01	BLZF1	BLCA	Yes	No	No	No	No
TCGA-BL-A13J-01	BMX	BLCA	Yes	No	No	No	No
TCGA-BL-A13J-01	BPTF	BLCA	Yes	No	No	No	No
TCGA-BL-A13J-01	BTN2A1	BLCA	Yes	No	No	No	No
TCGA-BL-A13J-01	C20orf196	BLCA	Yes	No	No	No	No
TCGA-BL-A13J-01	C2orf27A	BLCA	Yes	No	No	No	No
TCGA-BL-A13J-01	C6orf203	BLCA	Yes	No	No	No	No
TCGA-BL-A13J-01	C8orf44-SGK3	BLCA	Yes	No	No	No	No
TCGA-BL-A13J-01	CAMSAP2	BLCA	Yes	No	No	No	No
TCGA-BL-A13J-01	CASS4	BLCA	Yes	No	No	No	No
TCGA-BL-A13J-01	CCDC138	BLCA	Yes	No	No	No	No
TCGA-BL-A13J-01	CCDC18	BLCA	Yes	No	No	No	No
TCGA-BL-A13J-01	CCDC40	BLCA	Yes	No	No	No	No
TCGA-BL-A13J-01	CEP57	BLCA	Yes	No	No	No	No
TCGA-BL-A13J-01	CEP68	BLCA	Yes	No	No	No	No
TCGA-BL-A13J-01	CFLAR	BLCA	Yes	No	No	No	No
TCGA-BL-A13J-01	CHD9	BLCA	Yes	No	No	No	No
TCGA-BL-A13J-01	CHEK1	BLCA	Yes	No	No	Yes	No
TCGA-BL-A13J-01	CLCN6	BLCA	Yes	No	No	No	No
TCGA-BL-A13J-01	CLIP4	BLCA	Yes	No	No	No	No
TCGA-BL-A13J-01	CLYBL	BLCA	Yes	No	No	No	No
TCGA-BL-A13J-01	CMSS1	BLCA	Yes	No	No	No	No
TCGA-BL-A13J-01	CNIH4	BLCA	Yes	No	No	No	No
TCGA-BL-A13J-01	CNTLN	BLCA	Yes	No	No	No	No
TCGA-BL-A13J-01	CROT	BLCA	Yes	No	No	No	No
TCGA-BL-A13J-01	CRTC3	BLCA	Yes	No	No	No	No
TCGA-BL-A13J-01	CUL1	BLCA	Yes	No	No	No	No
TCGA-BL-A13J-01	CUL9	BLCA	Yes	No	No	No	No
TCGA-BL-A13J-01	CYB5R4	BLCA	Yes	No	No	No	No
TCGA-BL-A13J-01	CYFIP2	BLCA	Yes	No	No	No	No
TCGA-BL-A13J-01	CYP27A1	BLCA	Yes	No	No	No	No
TCGA-BL-A13J-01	DDX49	BLCA	Yes	No	No	No	No
TCGA-BL-A13J-01	DGKE	BLCA	Yes	No	No	No	No
TCGA-BL-A13J-01	DLGAP2	BLCA	Yes	No	No	No	No
TCGA-BL-A13J-01	DMXL1	BLCA	Yes	No	No	No	No
TCGA-BL-A13J-01	DNHD1	BLCA	Yes	No	No	No	No
TCGA-BL-A13J-01	DPY19L4	BLCA	Yes	No	No	No	Yes
TCGA-BL-A13J-01	DTNA	BLCA	Yes	No	No	No	No
TCGA-BL-A13J-01	DYNC2LI1	BLCA	Yes	No	No	No	No
TCGA-BL-A13J-01	ECHDC3	BLCA	Yes	No	No	No	No
TCGA-BL-A13J-01	EFCAB2	BLCA	Yes	No	No	No	No
TCGA-BL-A13J-01	ENDOV	BLCA	Yes	No	No	Yes	No
TCGA-BL-A13J-01	EPB41L5	BLCA	Yes	No	No	No	No
TCGA-BL-A13J-01	ERCC4	BLCA	Yes	No	No	Yes	No
TCGA-BL-A13J-01	ERCC6L2	BLCA	Yes	No	No	Yes	No
TCGA-BL-A13J-01	EXOC4	BLCA	Yes	No	No	No	No
TCGA-BL-A13J-01	FAHD2A	BLCA	Yes	No	No	No	No
TCGA-BL-A13J-01	FAM120B	BLCA	Yes	No	No	No	No
TCGA-BL-A13J-01	FAM124A	BLCA	Yes	No	No	No	No
TCGA-BL-A13J-01	FAM149A	BLCA	Yes	No	No	No	No
TCGA-BL-A13J-01	FAM185A	BLCA	Yes	No	No	No	No
TCGA-BL-A13J-01	FAM20C	BLCA	Yes	No	No	No	No
TCGA-BL-A13J-01	FAM228B	BLCA	Yes	No	No	No	No
TCGA-BL-A13J-01	FAM91A1	BLCA	Yes	No	No	No	No
TCGA-BL-A13J-01	FANCI	BLCA	Yes	No	No	Yes	No
TCGA-BL-A13J-01	FMN2	BLCA	Yes	No	No	No	No
TCGA-BL-A13J-01	FNDC3B	BLCA	Yes	No	No	No	No
TCGA-BL-A13J-01	FPGT-TNNI3K	BLCA	Yes	No	No	No	No
TCGA-BL-A13J-01	GABPB2	BLCA	Yes	No	No	No	No
TCGA-BL-A13J-01	GARNL3	BLCA	Yes	No	No	No	No
TCGA-BL-A13J-01	GFM1	BLCA	Yes	No	No	No	No
TCGA-BL-A13J-01	GGPS1	BLCA	Yes	No	No	No	No
TCGA-BL-A13J-01	GLIPR1L2	BLCA	Yes	No	No	No	No
TCGA-BL-A13J-01	GNAL	BLCA	Yes	No	No	No	No
TCGA-BL-A13J-01	GPATCH2L	BLCA	Yes	No	No	No	No
TCGA-BL-A13J-01	GPR146	BLCA	Yes	No	No	No	No
TCGA-BL-A13J-01	GRHPR	BLCA	Yes	No	No	No	No
TCGA-BL-A13J-01	GTF2H1	BLCA	Yes	No	No	Yes	No
TCGA-BL-A13J-01	GVQW3	BLCA	Yes	No	No	No	No
TCGA-BL-A13J-01	HECTD2	BLCA	Yes	No	No	No	No
TCGA-BL-A13J-01	HEXB	BLCA	Yes	No	No	No	No
TCGA-BL-A13J-01	HIST1H2BD	BLCA	Yes	No	No	No	No
TCGA-BL-A13J-01	HSPE1-MOB4	BLCA	Yes	No	No	No	No
TCGA-BL-A13J-01	IFT43	BLCA	Yes	No	No	No	No
TCGA-BL-A13J-01	IGF2R	BLCA	Yes	No	No	No	No
TCGA-BL-A13J-01	IL18R1	BLCA	Yes	No	No	No	No
TCGA-BL-A13J-01	ILF3	BLCA	Yes	No	No	No	No
TCGA-BL-A13J-01	ING3	BLCA	Yes	No	No	No	No
TCGA-BL-A13J-01	ING5	BLCA	Yes	No	No	No	No
TCGA-BL-A13J-01	IQCH	BLCA	Yes	No	No	No	No
TCGA-BL-A13J-01	IVD	BLCA	Yes	No	No	No	No
TCGA-BL-A13J-01	JHY	BLCA	Yes	No	No	No	No
TCGA-BL-A13J-01	KAT8	BLCA	Yes	No	No	No	No
TCGA-BL-A13J-01	KCNAB2	BLCA	Yes	No	No	No	No
TCGA-BL-A13J-01	KDM4C	BLCA	Yes	No	No	No	No
TCGA-BL-A13J-01	KIAA0141	BLCA	Yes	No	No	No	No
TCGA-BL-A13J-01	KIAA0232	BLCA	Yes	No	No	No	No
TCGA-BL-A13J-01	KIAA0586	BLCA	Yes	No	No	No	No
TCGA-BL-A13J-01	KIAA1841	BLCA	Yes	No	No	No	No
TCGA-BL-A13J-01	KIF1B	BLCA	Yes	No	No	No	No
TCGA-BL-A13J-01	KIZ	BLCA	Yes	No	No	No	No
TCGA-BL-A13J-01	KLHL7	BLCA	Yes	No	No	No	No
TCGA-BL-A13J-01	KPNA5	BLCA	Yes	No	No	No	No
TCGA-BL-A13J-01	LACTB	BLCA	Yes	No	No	No	No
TCGA-BL-A13J-01	LAMA3	BLCA	Yes	No	No	No	No
TCGA-BL-A13J-01	LANCL2	BLCA	Yes	No	No	No	No
TCGA-BL-A13J-01	LARP1B	BLCA	Yes	No	No	No	No
TCGA-BL-A13J-01	LEPR	BLCA	Yes	No	No	No	No
TCGA-BL-A13J-01	LIAS	BLCA	Yes	No	No	No	No
TCGA-BL-A13J-01	LIMK2	BLCA	Yes	No	No	No	No
TCGA-BL-A13J-01	LRRC27	BLCA	Yes	No	No	No	No
TCGA-BL-A13J-01	LRRC28	BLCA	Yes	No	No	No	No
TCGA-BL-A13J-01	LRRC61	BLCA	Yes	No	No	No	No
TCGA-BL-A13J-01	MACF1	BLCA	Yes	No	No	No	No
TCGA-BL-A13J-01	MACROD2	BLCA	Yes	No	No	No	No
TCGA-BL-A13J-01	MARVELD3	BLCA	Yes	No	No	No	No
TCGA-BL-A13J-01	MBD5	BLCA	Yes	No	No	No	No
TCGA-BL-A13J-01	MIB2	BLCA	Yes	No	No	No	No
TCGA-BL-A13J-01	MPI	BLCA	Yes	No	No	No	No
TCGA-BL-A13J-01	MPND	BLCA	Yes	No	No	No	No
TCGA-BL-A13J-01	MRM3	BLCA	Yes	No	No	No	No
TCGA-BL-A13J-01	MRPL37	BLCA	Yes	No	No	No	No
TCGA-BL-A13J-01	MRPS6	BLCA	Yes	No	No	No	No
TCGA-BL-A13J-01	MTA3	BLCA	Yes	No	No	No	No
TCGA-BL-A13J-01	MTHFD2L	BLCA	Yes	No	No	No	No
TCGA-BL-A13J-01	MUM1	BLCA	Yes	No	No	No	No
TCGA-BL-A13J-01	MVB12A	BLCA	Yes	No	No	No	No
TCGA-BL-A13J-01	MVP	BLCA	Yes	No	No	No	No
TCGA-BL-A13J-01	NAALADL2	BLCA	Yes	No	No	No	No
TCGA-BL-A13J-01	NADSYN1	BLCA	Yes	No	No	No	No
TCGA-BL-A13J-01	NEK11	BLCA	Yes	No	No	No	No
TCGA-BL-A13J-01	NFE2L3	BLCA	Yes	No	No	No	No
TCGA-BL-A13J-01	NIPAL3	BLCA	Yes	No	No	No	No
TCGA-BL-A13J-01	NIPBL	BLCA	Yes	No	No	Yes	Yes
TCGA-BL-A13J-01	NME1-NME2	BLCA	Yes	No	No	No	No
TCGA-BL-A13J-01	NPM1	BLCA	Yes	No	No	Yes	Yes
TCGA-BL-A13J-01	NSUN7	BLCA	Yes	No	No	No	No
TCGA-BL-A13J-01	NTNG1	BLCA	Yes	No	No	No	No
TCGA-BL-A13J-01	NXPE3	BLCA	Yes	No	No	No	No
TCGA-BL-A13J-01	OAS1	BLCA	Yes	No	No	No	No
TCGA-BL-A13J-01	OCIAD1	BLCA	Yes	No	No	No	No
TCGA-BL-A13J-01	ORC3	BLCA	Yes	No	No	No	No
TCGA-BL-A13J-01	PAK3	BLCA	Yes	No	No	No	No
TCGA-BL-A13J-01	PANK2	BLCA	Yes	No	No	No	No
TCGA-BL-A13J-01	PAPOLA	BLCA	Yes	No	No	No	No
TCGA-BL-A13J-01	PATJ	BLCA	Yes	No	No	No	No
TCGA-BL-A13J-01	PCDH7	BLCA	Yes	No	No	No	Yes
TCGA-BL-A13J-01	PCGF5	BLCA	Yes	No	No	No	No
TCGA-BL-A13J-01	PCM1	BLCA	Yes	No	No	No	No
TCGA-BL-A13J-01	PCMT1	BLCA	Yes	No	No	No	No
TCGA-BL-A13J-01	PCNX1	BLCA	Yes	No	No	No	No
TCGA-BL-A13J-01	PCTP	BLCA	Yes	No	No	No	No
TCGA-BL-A13J-01	PDE3A	BLCA	Yes	No	No	No	No
TCGA-BL-A13J-01	PDE9A	BLCA	Yes	No	No	No	No
TCGA-BL-A13J-01	PDK2	BLCA	Yes	No	No	No	No
TCGA-BL-A13J-01	PDK3	BLCA	Yes	No	No	No	No
TCGA-BL-A13J-01	PDLIM5	BLCA	Yes	No	No	No	No
TCGA-BL-A13J-01	PDXK	BLCA	Yes	No	No	No	No
TCGA-BL-A13J-01	PEX13	BLCA	Yes	No	No	No	No
TCGA-BL-A13J-01	PHF20	BLCA	Yes	No	No	No	No
TCGA-BL-A13J-01	PHF20L1	BLCA	Yes	No	No	No	No
TCGA-BL-A13J-01	PIBF1	BLCA	Yes	No	No	No	No
TCGA-BL-A13J-01	PIK3C3	BLCA	Yes	No	No	No	No
TCGA-BL-A13J-01	PIP5K1B	BLCA	Yes	No	No	No	No
TCGA-BL-A13J-01	PLCB1	BLCA	Yes	No	No	No	No
TCGA-BL-A13J-01	PLEKHA8	BLCA	Yes	No	No	No	No
TCGA-BL-A13J-01	PML	BLCA	Yes	No	No	No	No
TCGA-BL-A13J-01	POLI	BLCA	Yes	No	No	Yes	No
TCGA-BL-A13J-01	PPAN-P2RY11	BLCA	Yes	No	No	No	No
TCGA-BL-A13J-01	PPARA	BLCA	Yes	No	No	No	No
TCGA-BL-A13J-01	PPIL2	BLCA	Yes	No	No	No	No
TCGA-BL-A13J-01	PPP1R3F	BLCA	Yes	No	No	No	No
TCGA-BL-A13J-01	PPP2R5C	BLCA	Yes	No	No	No	No
TCGA-BL-A13J-01	PRMT2	BLCA	Yes	No	No	No	No
TCGA-BL-A13J-01	PTEN	BLCA	Yes	No	No	No	Yes
TCGA-BL-A13J-01	PTPN4	BLCA	Yes	No	No	No	No
TCGA-BL-A13J-01	PTPRJ	BLCA	Yes	No	No	No	No
TCGA-BL-A13J-01	RAB3C	BLCA	Yes	No	No	No	No
TCGA-BL-A13J-01	RABEP1	BLCA	Yes	No	No	No	No
TCGA-BL-A13J-01	RABGEF1	BLCA	Yes	No	No	No	No
TCGA-BL-A13J-01	RAD50	BLCA	Yes	No	No	Yes	No
TCGA-BL-A13J-01	RAD51B	BLCA	Yes	No	No	Yes	No
TCGA-BL-A13J-01	RAD51C	BLCA	Yes	No	No	Yes	No
TCGA-BL-A13J-01	RBBP6	BLCA	Yes	No	No	No	Yes
TCGA-BL-A13J-01	RBCK1	BLCA	Yes	No	No	No	No
TCGA-BL-A13J-01	RFC3	BLCA	Yes	No	No	Yes	No
TCGA-BL-A13J-01	RGS12	BLCA	Yes	No	No	No	Yes
TCGA-BL-A13J-01	RNASEH2B	BLCA	Yes	No	No	No	No
TCGA-BL-A13J-01	RNF180	BLCA	Yes	No	No	No	No
TCGA-BL-A13J-01	ROR1	BLCA	Yes	No	No	No	No
TCGA-BL-A13J-01	RPA1	BLCA	Yes	No	No	Yes	No
TCGA-BL-A13J-01	RPAP2	BLCA	Yes	No	No	No	No
TCGA-BL-A13J-01	RPP30	BLCA	Yes	No	No	No	No
TCGA-BL-A13J-01	RYR2	BLCA	Yes	No	No	No	No
TCGA-BL-A13J-01	SARS	BLCA	Yes	No	No	No	No
TCGA-BL-A13J-01	SCFD1	BLCA	Yes	No	No	No	No
TCGA-BL-A13J-01	SCLY	BLCA	Yes	No	No	No	No
TCGA-BL-A13J-01	SDCCAG8	BLCA	Yes	No	No	No	No
TCGA-BL-A13J-01	SEC14L1	BLCA	Yes	No	No	No	No
TCGA-BL-A13J-01	SEC22A	BLCA	Yes	No	No	No	Yes
TCGA-BL-A13J-01	SETMAR	BLCA	Yes	No	No	No	No
TCGA-BL-A13J-01	SHISA6	BLCA	Yes	No	No	No	No
TCGA-BL-A13J-01	SIN3B	BLCA	Yes	No	No	No	No
TCGA-BL-A13J-01	SLC25A37	BLCA	Yes	No	No	No	No
TCGA-BL-A13J-01	SLC30A9	BLCA	Yes	No	No	Yes	No
TCGA-BL-A13J-01	SLC35A3	BLCA	Yes	No	No	No	No
TCGA-BL-A13J-01	SLC38A6	BLCA	Yes	No	No	No	No
TCGA-BL-A13J-01	SLC44A1	BLCA	Yes	No	No	No	No
TCGA-BL-A13J-01	SLIT2	BLCA	Yes	No	No	No	No
TCGA-BL-A13J-01	SP2	BLCA	Yes	No	No	No	No
TCGA-BL-A13J-01	STON1	BLCA	Yes	No	No	No	No
TCGA-BL-A13J-01	STXBP1	BLCA	Yes	No	No	No	No
TCGA-BL-A13J-01	SWT1	BLCA	Yes	No	No	No	No
TCGA-BL-A13J-01	SYNJ2	BLCA	Yes	No	No	No	No
TCGA-BL-A13J-01	TANC2	BLCA	Yes	No	No	No	No
TCGA-BL-A13J-01	TCAIM	BLCA	Yes	No	No	No	No
TCGA-BL-A13J-01	TEX22	BLCA	Yes	No	No	No	No
TCGA-BL-A13J-01	TF	BLCA	Yes	No	No	No	No
TCGA-BL-A13J-01	THNSL2	BLCA	Yes	No	No	No	No
TCGA-BL-A13J-01	TMCO3	BLCA	Yes	No	No	No	No
TCGA-BL-A13J-01	TOM1L1	BLCA	Yes	No	No	No	No
TCGA-BL-A13J-01	TRAPPC10	BLCA	Yes	No	No	No	No
TCGA-BL-A13J-01	TRIOBP	BLCA	Yes	No	No	No	No
TCGA-BL-A13J-01	URI1	BLCA	Yes	No	No	No	No
TCGA-BL-A13J-01	VPS8	BLCA	Yes	No	No	No	No
TCGA-BL-A13J-01	VWA5A	BLCA	Yes	No	No	No	No
TCGA-BL-A13J-01	WDR19	BLCA	Yes	No	No	No	No
TCGA-BL-A13J-01	WDR20	BLCA	Yes	No	No	No	No
TCGA-BL-A13J-01	WDR7	BLCA	Yes	No	No	No	No
TCGA-BL-A13J-01	WNK2	BLCA	Yes	No	No	No	No
TCGA-BL-A13J-01	WNT2B	BLCA	Yes	No	No	No	No
TCGA-BL-A13J-01	WRB-SH3BGR	BLCA	Yes	No	No	No	No
TCGA-BL-A13J-01	WWOX	BLCA	Yes	No	No	No	No
TCGA-BL-A13J-01	XYLB	BLCA	Yes	No	No	No	No
TCGA-BL-A13J-01	YAP1	BLCA	Yes	No	No	No	No
TCGA-BL-A13J-01	YLPM1	BLCA	Yes	No	No	No	Yes
TCGA-BL-A13J-01	ZCCHC2	BLCA	Yes	No	No	No	No
TCGA-BL-A13J-01	ZCWPW2	BLCA	Yes	No	No	No	No
TCGA-BL-A13J-01	ZFP2	BLCA	Yes	No	No	No	No
TCGA-BL-A13J-01	ZNF174	BLCA	Yes	No	No	No	No
TCGA-BL-A13J-01	ZNF264	BLCA	Yes	No	No	No	No
TCGA-BL-A13J-01	ZNF286A	BLCA	Yes	No	No	No	No
TCGA-BL-A13J-01	ZNF331	BLCA	Yes	No	No	No	No
TCGA-BL-A13J-01	ZNF33A	BLCA	Yes	No	No	No	No
TCGA-BL-A13J-01	ZNF431	BLCA	Yes	No	No	No	No
TCGA-BL-A13J-01	ZNF451	BLCA	Yes	No	No	No	No
TCGA-BL-A13J-01	ZNF454	BLCA	Yes	No	No	No	No
TCGA-BL-A13J-01	ZNF530	BLCA	Yes	No	No	No	No
TCGA-BL-A13J-01	ZNF540	BLCA	Yes	No	No	No	No
TCGA-BL-A13J-01	ZNF596	BLCA	Yes	No	No	No	No
TCGA-BL-A13J-01	ZNF718	BLCA	Yes	No	No	No	No
TCGA-BL-A13J-01	ZNF813	BLCA	Yes	Yes	Yes	No	No
TCGA-BL-A13J-01	ZNF862	BLCA	Yes	No	No	No	No
TCGA-BL-A13J-01	ZSCAN2	BLCA	Yes	No	No	No	No
TCGA-BT-A20N-01	ABL1	BLCA	Yes	No	No	Yes	No
TCGA-BT-A20N-01	ADGRL2	BLCA	Yes	No	No	No	No
TCGA-BT-A20N-01	AGO3	BLCA	Yes	No	No	No	No
TCGA-BT-A20N-01	AIG1	BLCA	Yes	No	No	No	No
TCGA-BT-A20N-01	ALG13	BLCA	Yes	No	No	No	No
TCGA-BT-A20N-01	ALPK1	BLCA	Yes	No	No	No	No
TCGA-BT-A20N-01	ANKDD1A	BLCA	Yes	No	No	No	No
TCGA-BT-A20N-01	ANKRD12	BLCA	Yes	No	No	No	No
TCGA-BT-A20N-01	ANTXR1	BLCA	Yes	No	No	No	No
TCGA-BT-A20N-01	APLF	BLCA	Yes	No	No	Yes	No
TCGA-BT-A20N-01	APOBEC3F	BLCA	Yes	No	No	No	No
TCGA-BT-A20N-01	APOPT1	BLCA	Yes	No	No	No	No
TCGA-BT-A20N-01	ARHGEF17	BLCA	Yes	No	No	No	No
TCGA-BT-A20N-01	ARMC8	BLCA	Yes	No	No	No	No
TCGA-BT-A20N-01	ASXL1	BLCA	Yes	No	No	No	Yes
TCGA-BT-A20N-01	ATG10	BLCA	Yes	No	No	No	No
TCGA-BT-A20N-01	ATG7	BLCA	Yes	No	No	No	No
TCGA-BT-A20N-01	ATP11B	BLCA	Yes	No	No	No	No
TCGA-BT-A20N-01	ATP2A2	BLCA	Yes	No	No	No	No
TCGA-BT-A20N-01	ATP5S	BLCA	Yes	No	No	No	No
TCGA-BT-A20N-01	BCAP29	BLCA	Yes	No	No	No	No
TCGA-BT-A20N-01	BCCIP	BLCA	Yes	No	No	No	No
TCGA-BT-A20N-01	BEND6	BLCA	Yes	No	No	No	No
TCGA-BT-A20N-01	BICD1	BLCA	Yes	No	No	No	No
TCGA-BT-A20N-01	BLZF1	BLCA	Yes	No	No	No	No
TCGA-BT-A20N-01	BMP1	BLCA	Yes	No	No	No	No
TCGA-BT-A20N-01	BMX	BLCA	Yes	No	No	No	No
TCGA-BT-A20N-01	BPHL	BLCA	Yes	No	No	No	No
TCGA-BT-A20N-01	BPTF	BLCA	Yes	No	No	No	No
TCGA-BT-A20N-01	BROX	BLCA	Yes	No	No	No	No
TCGA-BT-A20N-01	BTD	BLCA	Yes	No	No	No	No
TCGA-BT-A20N-01	C16orf52	BLCA	Yes	No	No	No	No
TCGA-BT-A20N-01	C20orf196	BLCA	Yes	No	No	No	No
TCGA-BT-A20N-01	C2orf27A	BLCA	Yes	No	No	No	No
TCGA-BT-A20N-01	C8orf44	BLCA	Yes	No	No	No	No
TCGA-BT-A20N-01	CAMK1D	BLCA	Yes	No	No	No	No
TCGA-BT-A20N-01	CBWD2	BLCA	Yes	No	No	No	No
TCGA-BT-A20N-01	CCDC138	BLCA	Yes	No	No	No	No
TCGA-BT-A20N-01	CCDC30	BLCA	Yes	No	No	No	No
TCGA-BT-A20N-01	CCDC40	BLCA	Yes	No	No	No	No
TCGA-BT-A20N-01	CCDC50	BLCA	Yes	No	No	No	No
TCGA-BT-A20N-01	CDADC1	BLCA	Yes	No	No	No	No
TCGA-BT-A20N-01	CDH23	BLCA	Yes	No	No	No	No
TCGA-BT-A20N-01	CEP57	BLCA	Yes	No	No	No	No
TCGA-BT-A20N-01	CEP68	BLCA	Yes	No	No	No	No
TCGA-BT-A20N-01	CEP72	BLCA	Yes	No	No	No	No
TCGA-BT-A20N-01	CEP78	BLCA	Yes	No	No	No	No
TCGA-BT-A20N-01	CHD9	BLCA	Yes	No	No	No	No
TCGA-BT-A20N-01	CHRNA5	BLCA	Yes	No	No	No	No
TCGA-BT-A20N-01	CLCN6	BLCA	Yes	No	No	No	No
TCGA-BT-A20N-01	CLIP4	BLCA	Yes	No	No	No	No
TCGA-BT-A20N-01	CNIH4	BLCA	Yes	No	No	No	No
TCGA-BT-A20N-01	CNTLN	BLCA	Yes	No	No	No	No
TCGA-BT-A20N-01	COQ4	BLCA	Yes	No	No	No	No
TCGA-BT-A20N-01	CRELD1	BLCA	Yes	No	No	No	No
TCGA-BT-A20N-01	CREM	BLCA	Yes	No	No	No	No
TCGA-BT-A20N-01	CROT	BLCA	Yes	No	No	No	No
TCGA-BT-A20N-01	CUL9	BLCA	Yes	No	No	No	No
TCGA-BT-A20N-01	CYB5R4	BLCA	Yes	No	No	No	No
TCGA-BT-A20N-01	CYFIP2	BLCA	Yes	No	No	No	No
TCGA-BT-A20N-01	CYP27A1	BLCA	Yes	No	No	No	No
TCGA-BT-A20N-01	DDX49	BLCA	Yes	No	No	No	No
TCGA-BT-A20N-01	DIAPH2	BLCA	Yes	No	No	No	No
TCGA-BT-A20N-01	DISP1	BLCA	Yes	No	No	No	No
TCGA-BT-A20N-01	DTNA	BLCA	Yes	No	No	No	No
TCGA-BT-A20N-01	DTWD1	BLCA	Yes	No	No	No	No
TCGA-BT-A20N-01	DYNC2LI1	BLCA	Yes	No	No	No	No
TCGA-BT-A20N-01	EFCAB2	BLCA	Yes	No	No	No	No
TCGA-BT-A20N-01	EIF2B5	BLCA	Yes	No	No	No	No
TCGA-BT-A20N-01	EIF4E2	BLCA	Yes	No	No	No	No
TCGA-BT-A20N-01	ENDOV	BLCA	Yes	No	No	Yes	No
TCGA-BT-A20N-01	EPB41L5	BLCA	Yes	No	No	No	No
TCGA-BT-A20N-01	ERCC4	BLCA	Yes	No	No	Yes	No
TCGA-BT-A20N-01	FAM177A1	BLCA	Yes	No	No	No	No
TCGA-BT-A20N-01	FAM185A	BLCA	Yes	No	No	No	No
TCGA-BT-A20N-01	FAM198A	BLCA	Yes	No	No	No	No
TCGA-BT-A20N-01	FAM20C	BLCA	Yes	No	No	No	No
TCGA-BT-A20N-01	FAM228B	BLCA	Yes	No	No	No	No
TCGA-BT-A20N-01	FAM234A	BLCA	Yes	No	No	No	No
TCGA-BT-A20N-01	FAN1	BLCA	Yes	No	No	Yes	No
TCGA-BT-A20N-01	FANCI	BLCA	Yes	No	No	Yes	No
TCGA-BT-A20N-01	FARP1	BLCA	Yes	No	No	No	No
TCGA-BT-A20N-01	FBLN1	BLCA	Yes	No	No	No	No
TCGA-BT-A20N-01	FIG4	BLCA	Yes	No	No	No	No
TCGA-BT-A20N-01	FMN2	BLCA	Yes	No	No	No	No
TCGA-BT-A20N-01	FNDC3B	BLCA	Yes	No	No	No	No
TCGA-BT-A20N-01	FOXK1	BLCA	Yes	No	No	No	No
TCGA-BT-A20N-01	FPGT-TNNI3K	BLCA	Yes	No	No	No	No
TCGA-BT-A20N-01	FXR1	BLCA	Yes	No	No	No	No
TCGA-BT-A20N-01	GARNL3	BLCA	Yes	No	No	No	No
TCGA-BT-A20N-01	GNAL	BLCA	Yes	No	No	No	No
TCGA-BT-A20N-01	GPATCH2L	BLCA	Yes	No	No	No	No
TCGA-BT-A20N-01	GPR146	BLCA	Yes	No	No	No	No
TCGA-BT-A20N-01	GPSM2	BLCA	Yes	No	No	No	No
TCGA-BT-A20N-01	GRAP2	BLCA	Yes	No	No	No	No
TCGA-BT-A20N-01	GRHPR	BLCA	Yes	No	No	No	No
TCGA-BT-A20N-01	GTF2H1	BLCA	Yes	No	No	Yes	No
TCGA-BT-A20N-01	HECTD2	BLCA	Yes	No	No	No	No
TCGA-BT-A20N-01	HNMT	BLCA	Yes	No	No	No	No
TCGA-BT-A20N-01	HNRNPA3	BLCA	Yes	No	No	No	No
TCGA-BT-A20N-01	HOXC4	BLCA	Yes	No	No	No	No
TCGA-BT-A20N-01	INF2	BLCA	Yes	No	No	No	No
TCGA-BT-A20N-01	ING3	BLCA	Yes	No	No	No	No
TCGA-BT-A20N-01	ING5	BLCA	Yes	No	No	No	No
TCGA-BT-A20N-01	IQCH	BLCA	Yes	No	No	No	No
TCGA-BT-A20N-01	ITGA1	BLCA	Yes	No	No	No	No
TCGA-BT-A20N-01	IVD	BLCA	Yes	No	No	No	No
TCGA-BT-A20N-01	JHY	BLCA	Yes	No	No	No	No
TCGA-BT-A20N-01	KCNAB2	BLCA	Yes	No	No	No	No
TCGA-BT-A20N-01	KCTD2	BLCA	Yes	No	No	No	No
TCGA-BT-A20N-01	KIAA0141	BLCA	Yes	No	No	No	No
TCGA-BT-A20N-01	KIAA0586	BLCA	Yes	No	No	No	No
TCGA-BT-A20N-01	KIAA1841	BLCA	Yes	No	No	No	No
TCGA-BT-A20N-01	KIF1B	BLCA	Yes	No	No	No	No
TCGA-BT-A20N-01	KIZ	BLCA	Yes	No	No	No	No
TCGA-BT-A20N-01	KLF3	BLCA	Yes	No	No	No	No
TCGA-BT-A20N-01	KLHL18	BLCA	Yes	No	No	No	No
TCGA-BT-A20N-01	KLHL7	BLCA	Yes	No	No	No	No
TCGA-BT-A20N-01	L3MBTL1	BLCA	Yes	No	No	No	No
TCGA-BT-A20N-01	LANCL2	BLCA	Yes	No	No	No	No
TCGA-BT-A20N-01	LIAS	BLCA	Yes	No	No	No	No
TCGA-BT-A20N-01	LIMK2	BLCA	Yes	No	No	No	No
TCGA-BT-A20N-01	LRCH3	BLCA	Yes	No	No	No	No
TCGA-BT-A20N-01	LRRC27	BLCA	Yes	No	No	No	No
TCGA-BT-A20N-01	LRRC28	BLCA	Yes	No	No	No	No
TCGA-BT-A20N-01	LRRC61	BLCA	Yes	No	No	No	No
TCGA-BT-A20N-01	LRRFIP1	BLCA	Yes	No	No	No	No
TCGA-BT-A20N-01	MACROD2	BLCA	Yes	No	No	No	No
TCGA-BT-A20N-01	MAP3K8	BLCA	Yes	No	No	No	No
TCGA-BT-A20N-01	MBD5	BLCA	Yes	No	No	No	No
TCGA-BT-A20N-01	MCPH1	BLCA	Yes	No	No	No	No
TCGA-BT-A20N-01	MINOS1-NBL1	BLCA	Yes	No	No	No	No
TCGA-BT-A20N-01	MPI	BLCA	Yes	No	No	No	No
TCGA-BT-A20N-01	MRM3	BLCA	Yes	No	No	No	No
TCGA-BT-A20N-01	MROH1	BLCA	Yes	No	No	No	No
TCGA-BT-A20N-01	MRPL37	BLCA	Yes	No	No	No	No
TCGA-BT-A20N-01	MRPS6	BLCA	Yes	No	No	No	No
TCGA-BT-A20N-01	MSTO1	BLCA	Yes	No	No	No	No
TCGA-BT-A20N-01	MTA3	BLCA	Yes	No	No	No	No
TCGA-BT-A20N-01	MTHFD2L	BLCA	Yes	No	No	No	No
TCGA-BT-A20N-01	MVB12A	BLCA	Yes	No	No	No	No
TCGA-BT-A20N-01	MVP	BLCA	Yes	No	No	No	No
TCGA-BT-A20N-01	NAALADL2	BLCA	Yes	No	No	No	No
TCGA-BT-A20N-01	NADSYN1	BLCA	Yes	No	No	No	No
TCGA-BT-A20N-01	NBEAL1	BLCA	Yes	No	No	No	No
TCGA-BT-A20N-01	NBPF3	BLCA	Yes	No	No	No	No
TCGA-BT-A20N-01	NECAP2	BLCA	Yes	No	No	No	No
TCGA-BT-A20N-01	NFASC	BLCA	Yes	No	No	No	No
TCGA-BT-A20N-01	NFE2L3	BLCA	Yes	No	No	No	No
TCGA-BT-A20N-01	NHLRC3	BLCA	Yes	No	No	No	No
TCGA-BT-A20N-01	NIPBL	BLCA	Yes	No	No	Yes	Yes
TCGA-BT-A20N-01	NIT1	BLCA	Yes	No	No	No	No
TCGA-BT-A20N-01	NME1-NME2	BLCA	Yes	No	No	No	No
TCGA-BT-A20N-01	NPEPL1	BLCA	Yes	No	No	No	No
TCGA-BT-A20N-01	NPM1	BLCA	Yes	No	No	Yes	Yes
TCGA-BT-A20N-01	NSMCE2	BLCA	Yes	No	No	No	No
TCGA-BT-A20N-01	NSUN7	BLCA	Yes	No	No	No	No
TCGA-BT-A20N-01	NTNG1	BLCA	Yes	No	No	No	No
TCGA-BT-A20N-01	NUB1	BLCA	Yes	No	No	No	No
TCGA-BT-A20N-01	NUDT15	BLCA	Yes	No	No	No	No
TCGA-BT-A20N-01	OAS1	BLCA	Yes	No	No	No	No
TCGA-BT-A20N-01	OGG1	BLCA	Yes	No	No	Yes	No
TCGA-BT-A20N-01	PACS2	BLCA	Yes	No	No	No	No
TCGA-BT-A20N-01	PAIP2	BLCA	Yes	No	No	No	No
TCGA-BT-A20N-01	PANK2	BLCA	Yes	No	No	No	No
TCGA-BT-A20N-01	PAPOLA	BLCA	Yes	No	No	No	No
TCGA-BT-A20N-01	PATJ	BLCA	Yes	No	No	No	No
TCGA-BT-A20N-01	PCDH7	BLCA	Yes	No	No	No	Yes
TCGA-BT-A20N-01	PCGF5	BLCA	Yes	No	No	No	No
TCGA-BT-A20N-01	PCM1	BLCA	Yes	No	No	No	No
TCGA-BT-A20N-01	PCMT1	BLCA	Yes	No	No	No	No
TCGA-BT-A20N-01	PDCD11	BLCA	Yes	No	No	No	No
TCGA-BT-A20N-01	PDE3A	BLCA	Yes	No	No	No	No
TCGA-BT-A20N-01	PDE9A	BLCA	Yes	No	No	No	No
TCGA-BT-A20N-01	PDK2	BLCA	Yes	No	No	No	No
TCGA-BT-A20N-01	PDK3	BLCA	Yes	No	No	No	No
TCGA-BT-A20N-01	PFKFB2	BLCA	Yes	No	No	No	No
TCGA-BT-A20N-01	PHF20	BLCA	Yes	No	No	No	No
TCGA-BT-A20N-01	PHF20L1	BLCA	Yes	No	No	No	No
TCGA-BT-A20N-01	PHTF2	BLCA	Yes	No	No	No	No
TCGA-BT-A20N-01	PIBF1	BLCA	Yes	No	No	No	No
TCGA-BT-A20N-01	PIK3C3	BLCA	Yes	No	No	No	No
TCGA-BT-A20N-01	PIP5K1B	BLCA	Yes	No	No	No	No
TCGA-BT-A20N-01	PLCB1	BLCA	Yes	No	No	No	No
TCGA-BT-A20N-01	PML	BLCA	Yes	No	No	No	No
TCGA-BT-A20N-01	POLI	BLCA	Yes	No	No	Yes	No
TCGA-BT-A20N-01	POLR1D	BLCA	Yes	No	No	No	No
TCGA-BT-A20N-01	POLR2F	BLCA	Yes	No	No	No	No
TCGA-BT-A20N-01	PPAN-P2RY11	BLCA	Yes	No	No	No	No
TCGA-BT-A20N-01	PPARA	BLCA	Yes	No	No	No	No
TCGA-BT-A20N-01	PPFIBP2	BLCA	Yes	No	No	No	No
TCGA-BT-A20N-01	PPIE	BLCA	Yes	No	No	No	No
TCGA-BT-A20N-01	PPP1R7	BLCA	Yes	No	No	No	No
TCGA-BT-A20N-01	PPP2R5C	BLCA	Yes	No	No	No	No
TCGA-BT-A20N-01	PQLC2L	BLCA	Yes	No	No	No	No
TCGA-BT-A20N-01	PRKRIP1	BLCA	Yes	No	No	No	No
TCGA-BT-A20N-01	PRMT2	BLCA	Yes	No	No	No	No
TCGA-BT-A20N-01	PTEN	BLCA	Yes	No	No	No	Yes
TCGA-BT-A20N-01	RAB3GAP1	BLCA	Yes	No	No	No	No
TCGA-BT-A20N-01	RABEP1	BLCA	Yes	No	No	No	No
TCGA-BT-A20N-01	RABGEF1	BLCA	Yes	No	No	No	No
TCGA-BT-A20N-01	RAD51B	BLCA	Yes	No	No	Yes	No
TCGA-BT-A20N-01	RAD51C	BLCA	Yes	No	No	Yes	No
TCGA-BT-A20N-01	RBCK1	BLCA	Yes	No	No	No	No
TCGA-BT-A20N-01	RCOR3	BLCA	Yes	No	No	No	No
TCGA-BT-A20N-01	REEP3	BLCA	Yes	No	No	No	No
TCGA-BT-A20N-01	RFC3	BLCA	Yes	No	No	Yes	No
TCGA-BT-A20N-01	RGS12	BLCA	Yes	No	No	No	Yes
TCGA-BT-A20N-01	RNASE4	BLCA	Yes	No	No	No	No
TCGA-BT-A20N-01	RNASEH2B	BLCA	Yes	No	No	No	No
TCGA-BT-A20N-01	RNF180	BLCA	Yes	No	No	No	No
TCGA-BT-A20N-01	ROR1	BLCA	Yes	No	No	No	No
TCGA-BT-A20N-01	RPA1	BLCA	Yes	No	No	Yes	No
TCGA-BT-A20N-01	RPP30	BLCA	Yes	No	No	No	No
TCGA-BT-A20N-01	RYR2	BLCA	Yes	No	No	No	No
TCGA-BT-A20N-01	SCFD1	BLCA	Yes	No	No	No	No
TCGA-BT-A20N-01	SCLY	BLCA	Yes	No	No	No	No
TCGA-BT-A20N-01	SDCCAG8	BLCA	Yes	No	No	No	No
TCGA-BT-A20N-01	SEC22A	BLCA	Yes	No	No	No	Yes
TCGA-BT-A20N-01	SHISA6	BLCA	Yes	No	No	No	No
TCGA-BT-A20N-01	SIN3B	BLCA	Yes	No	No	No	No
TCGA-BT-A20N-01	SLC30A9	BLCA	Yes	No	No	Yes	No
TCGA-BT-A20N-01	SLC35F1	BLCA	Yes	No	No	No	No
TCGA-BT-A20N-01	SLC38A6	BLCA	Yes	No	No	No	No
TCGA-BT-A20N-01	SLC44A1	BLCA	Yes	No	No	No	No
TCGA-BT-A20N-01	SLC5A10	BLCA	Yes	No	No	No	No
TCGA-BT-A20N-01	SMAD6	BLCA	Yes	No	No	No	No
TCGA-BT-A20N-01	SNX1	BLCA	Yes	No	No	No	No
TCGA-BT-A20N-01	SNX24	BLCA	Yes	No	No	No	No
TCGA-BT-A20N-01	SP100	BLCA	Yes	No	No	No	No
TCGA-BT-A20N-01	SP2	BLCA	Yes	No	No	No	No
TCGA-BT-A20N-01	SPRTN	BLCA	Yes	No	No	No	No
TCGA-BT-A20N-01	SRR	BLCA	Yes	No	No	No	No
TCGA-BT-A20N-01	STXBP4	BLCA	Yes	No	No	No	No
TCGA-BT-A20N-01	SYNGR1	BLCA	Yes	No	No	No	No
TCGA-BT-A20N-01	SYNJ2	BLCA	Yes	No	No	No	No
TCGA-BT-A20N-01	TAF8	BLCA	Yes	No	No	No	No
TCGA-BT-A20N-01	TANC1	BLCA	Yes	No	No	No	No
TCGA-BT-A20N-01	TANK	BLCA	Yes	No	No	No	No
TCGA-BT-A20N-01	TBC1D17	BLCA	Yes	No	No	No	No
TCGA-BT-A20N-01	TBCE	BLCA	Yes	No	No	No	No
TCGA-BT-A20N-01	TCAIM	BLCA	Yes	No	No	No	No
TCGA-BT-A20N-01	TCEANC2	BLCA	Yes	No	No	No	No
TCGA-BT-A20N-01	TECPR2	BLCA	Yes	No	No	No	No
TCGA-BT-A20N-01	TGFB1I1	BLCA	Yes	No	No	No	No
TCGA-BT-A20N-01	TMCO3	BLCA	Yes	No	No	No	No
TCGA-BT-A20N-01	TOM1L1	BLCA	Yes	No	No	No	No
TCGA-BT-A20N-01	TRAPPC13	BLCA	Yes	No	No	No	No
TCGA-BT-A20N-01	TRHDE	BLCA	Yes	No	No	No	No
TCGA-BT-A20N-01	TRIOBP	BLCA	Yes	No	No	No	No
TCGA-BT-A20N-01	TRNT1	BLCA	Yes	No	No	No	No
TCGA-BT-A20N-01	TSFM	BLCA	Yes	No	No	No	No
TCGA-BT-A20N-01	UBE2D4	BLCA	Yes	No	No	No	No
TCGA-BT-A20N-01	UBE3B	BLCA	Yes	No	No	No	No
TCGA-BT-A20N-01	VMP1	BLCA	Yes	No	No	No	No
TCGA-BT-A20N-01	VWA5A	BLCA	Yes	No	No	No	No
TCGA-BT-A20N-01	WDR20	BLCA	Yes	No	No	No	No
TCGA-BT-A20N-01	WNT2B	BLCA	Yes	No	No	No	No
TCGA-BT-A20N-01	WRB-SH3BGR	BLCA	Yes	No	No	No	No
TCGA-BT-A20N-01	WWOX	BLCA	Yes	No	No	No	No
TCGA-BT-A20N-01	XYLB	BLCA	Yes	No	No	No	No
TCGA-BT-A20N-01	YAE1D1	BLCA	Yes	No	No	No	No
TCGA-BT-A20N-01	ZCWPW2	BLCA	Yes	No	No	No	No
TCGA-BT-A20N-01	ZFP2	BLCA	Yes	No	No	No	No
TCGA-BT-A20N-01	ZNF107	BLCA	Yes	No	No	No	No
TCGA-BT-A20N-01	ZNF138	BLCA	Yes	No	No	No	No
TCGA-BT-A20N-01	ZNF273	BLCA	Yes	No	No	No	No
TCGA-BT-A20N-01	ZNF331	BLCA	Yes	No	No	No	No
TCGA-BT-A20N-01	ZNF346	BLCA	Yes	No	No	No	No
TCGA-BT-A20N-01	ZNF431	BLCA	Yes	No	No	No	No
TCGA-BT-A20N-01	ZNF451	BLCA	Yes	No	No	No	No
TCGA-BT-A20N-01	ZNF454	BLCA	Yes	No	No	No	No
TCGA-BT-A20N-01	ZNF540	BLCA	Yes	No	No	No	No
TCGA-BT-A20N-01	ZNF568	BLCA	Yes	No	No	No	No
TCGA-BT-A20N-01	ZNF655	BLCA	Yes	No	No	No	No
TCGA-BT-A20N-01	ZNF678	BLCA	Yes	No	No	No	No
TCGA-BT-A20N-01	ZNF718	BLCA	Yes	No	No	No	No
TCGA-BT-A20N-01	ZNF720	BLCA	Yes	No	No	No	No
TCGA-BT-A20N-01	ZNF862	BLCA	Yes	No	No	No	No
TCGA-BT-A20N-01	ZSCAN25	BLCA	Yes	No	No	No	No
TCGA-BT-A20Q-01	ACO2	BLCA	Yes	No	No	No	No
TCGA-BT-A20Q-01	ACOT11	BLCA	Yes	No	No	No	No
TCGA-BT-A20Q-01	AGAP11	BLCA	Yes	No	No	No	No
TCGA-BT-A20Q-01	AIG1	BLCA	Yes	No	No	No	No
TCGA-BT-A20Q-01	AKAP6	BLCA	Yes	No	No	No	No
TCGA-BT-A20Q-01	APOPT1	BLCA	Yes	No	No	No	No
TCGA-BT-A20Q-01	ARMC8	BLCA	Yes	No	No	No	No
TCGA-BT-A20Q-01	ARMC9	BLCA	Yes	No	No	No	No
TCGA-BT-A20Q-01	ATG10	BLCA	Yes	No	No	No	No
TCGA-BT-A20Q-01	ATP11B	BLCA	Yes	No	No	No	No
TCGA-BT-A20Q-01	ATP2A2	BLCA	Yes	No	No	No	No
TCGA-BT-A20Q-01	ATP5S	BLCA	Yes	No	No	No	No
TCGA-BT-A20Q-01	BBS1	BLCA	Yes	No	No	No	No
TCGA-BT-A20Q-01	BICD1	BLCA	Yes	No	No	No	No
TCGA-BT-A20Q-01	BMP1	BLCA	Yes	No	No	No	No
TCGA-BT-A20Q-01	BPHL	BLCA	Yes	No	No	No	No
TCGA-BT-A20Q-01	BPTF	BLCA	Yes	No	No	No	No
TCGA-BT-A20Q-01	BTD	BLCA	Yes	No	No	No	No
TCGA-BT-A20Q-01	BTN2A1	BLCA	Yes	No	No	No	No
TCGA-BT-A20Q-01	C11orf70	BLCA	Yes	No	No	No	No
TCGA-BT-A20Q-01	C16orf52	BLCA	Yes	No	No	No	No
TCGA-BT-A20Q-01	C20orf196	BLCA	Yes	No	No	No	No
TCGA-BT-A20Q-01	C2orf27A	BLCA	Yes	No	No	No	No
TCGA-BT-A20Q-01	C8orf44	BLCA	Yes	No	No	No	No
TCGA-BT-A20Q-01	C9orf3	BLCA	Yes	No	No	No	No
TCGA-BT-A20Q-01	CBWD2	BLCA	Yes	No	No	No	No
TCGA-BT-A20Q-01	CC2D2A	BLCA	Yes	No	No	No	No
TCGA-BT-A20Q-01	CCDC40	BLCA	Yes	No	No	No	No
TCGA-BT-A20Q-01	CCDC50	BLCA	Yes	No	No	No	No
TCGA-BT-A20Q-01	CDADC1	BLCA	Yes	No	No	No	No
TCGA-BT-A20Q-01	CDH23	BLCA	Yes	No	No	No	No
TCGA-BT-A20Q-01	CELF2	BLCA	Yes	No	No	No	No
TCGA-BT-A20Q-01	CEP68	BLCA	Yes	No	No	No	No
TCGA-BT-A20Q-01	CEP78	BLCA	Yes	No	No	No	No
TCGA-BT-A20Q-01	CFLAR	BLCA	Yes	No	No	No	No
TCGA-BT-A20Q-01	CHRNA5	BLCA	Yes	No	No	No	No
TCGA-BT-A20Q-01	CLCN6	BLCA	Yes	No	No	No	No
TCGA-BT-A20Q-01	CNIH4	BLCA	Yes	No	No	No	No
TCGA-BT-A20Q-01	CNPY3-GNMT	BLCA	Yes	No	No	No	No
TCGA-BT-A20Q-01	CNTLN	BLCA	Yes	No	No	No	No
TCGA-BT-A20Q-01	CPED1	BLCA	Yes	No	No	No	No
TCGA-BT-A20Q-01	CRIM1	BLCA	Yes	No	No	No	No
TCGA-BT-A20Q-01	CUL4A	BLCA	Yes	No	No	No	No
TCGA-BT-A20Q-01	CYFIP2	BLCA	Yes	No	No	No	No
TCGA-BT-A20Q-01	DCP2	BLCA	Yes	No	No	No	No
TCGA-BT-A20Q-01	DDX49	BLCA	Yes	No	No	No	No
TCGA-BT-A20Q-01	DGLUCY	BLCA	Yes	No	No	No	No
TCGA-BT-A20Q-01	DMXL1	BLCA	Yes	No	No	No	No
TCGA-BT-A20Q-01	DNAJB4	BLCA	Yes	No	No	No	No
TCGA-BT-A20Q-01	DTNA	BLCA	Yes	No	No	No	No
TCGA-BT-A20Q-01	EIF4E2	BLCA	Yes	No	No	No	No
TCGA-BT-A20Q-01	ENDOV	BLCA	Yes	No	No	Yes	No
TCGA-BT-A20Q-01	EPB41L5	BLCA	Yes	No	No	No	No
TCGA-BT-A20Q-01	ERCC4	BLCA	Yes	No	No	Yes	No
TCGA-BT-A20Q-01	ERCC6L2	BLCA	Yes	No	No	Yes	No
TCGA-BT-A20Q-01	FAM177A1	BLCA	Yes	No	No	No	No
TCGA-BT-A20Q-01	FAM20C	BLCA	Yes	No	No	No	No
TCGA-BT-A20Q-01	FAM228B	BLCA	Yes	No	No	No	No
TCGA-BT-A20Q-01	FAM234A	BLCA	Yes	No	No	No	No
TCGA-BT-A20Q-01	FAM47E-STBD1	BLCA	Yes	No	No	No	No
TCGA-BT-A20Q-01	FAN1	BLCA	Yes	No	No	Yes	No
TCGA-BT-A20Q-01	FANCI	BLCA	Yes	No	No	Yes	No
TCGA-BT-A20Q-01	FBLN1	BLCA	Yes	No	No	No	No
TCGA-BT-A20Q-01	FPGT-TNNI3K	BLCA	Yes	No	No	No	No
TCGA-BT-A20Q-01	GARNL3	BLCA	Yes	No	No	No	No
TCGA-BT-A20Q-01	GNAL	BLCA	Yes	No	No	No	No
TCGA-BT-A20Q-01	GPATCH2L	BLCA	Yes	No	No	No	No
TCGA-BT-A20Q-01	GSTM4	BLCA	Yes	No	No	No	No
TCGA-BT-A20Q-01	GTF2H1	BLCA	Yes	No	No	Yes	No
TCGA-BT-A20Q-01	GVQW3	BLCA	Yes	No	No	No	No
TCGA-BT-A20Q-01	HECTD2	BLCA	Yes	No	No	No	No
TCGA-BT-A20Q-01	HEXB	BLCA	Yes	No	No	No	No
TCGA-BT-A20Q-01	HIST1H2BD	BLCA	Yes	No	No	No	No
TCGA-BT-A20Q-01	HNMT	BLCA	Yes	No	No	No	No
TCGA-BT-A20Q-01	HSBP1L1	BLCA	Yes	No	No	No	No
TCGA-BT-A20Q-01	HSPE1-MOB4	BLCA	Yes	No	No	No	No
TCGA-BT-A20Q-01	IFT43	BLCA	Yes	No	No	No	No
TCGA-BT-A20Q-01	ILF3	BLCA	Yes	No	No	No	No
TCGA-BT-A20Q-01	ING3	BLCA	Yes	No	No	No	No
TCGA-BT-A20Q-01	ING5	BLCA	Yes	No	No	No	No
TCGA-BT-A20Q-01	IQCE	BLCA	Yes	No	No	No	No
TCGA-BT-A20Q-01	ITGA1	BLCA	Yes	No	No	No	No
TCGA-BT-A20Q-01	ITSN1	BLCA	Yes	No	No	No	No
TCGA-BT-A20Q-01	IVD	BLCA	Yes	No	No	No	No
TCGA-BT-A20Q-01	KCNC4	BLCA	Yes	No	No	No	No
TCGA-BT-A20Q-01	KDM4C	BLCA	Yes	No	No	No	No
TCGA-BT-A20Q-01	KIAA0141	BLCA	Yes	No	No	No	No
TCGA-BT-A20Q-01	KIAA0586	BLCA	Yes	No	No	No	No
TCGA-BT-A20Q-01	KIAA1841	BLCA	Yes	No	No	No	No
TCGA-BT-A20Q-01	KLC1	BLCA	Yes	No	No	No	No
TCGA-BT-A20Q-01	KLF3	BLCA	Yes	No	No	No	No
TCGA-BT-A20Q-01	KLHL36	BLCA	Yes	No	No	No	No
TCGA-BT-A20Q-01	KLHL7	BLCA	Yes	No	No	No	No
TCGA-BT-A20Q-01	LEPR	BLCA	Yes	No	No	No	No
TCGA-BT-A20Q-01	LIMK2	BLCA	Yes	No	No	No	No
TCGA-BT-A20Q-01	LRRC61	BLCA	Yes	No	No	No	No
TCGA-BT-A20Q-01	LRRFIP1	BLCA	Yes	No	No	No	No
TCGA-BT-A20Q-01	MACROD2	BLCA	Yes	No	No	No	No
TCGA-BT-A20Q-01	MBD5	BLCA	Yes	No	No	No	No
TCGA-BT-A20Q-01	MIB2	BLCA	Yes	No	No	No	No
TCGA-BT-A20Q-01	MPI	BLCA	Yes	No	No	No	No
TCGA-BT-A20Q-01	MRPL37	BLCA	Yes	No	No	No	No
TCGA-BT-A20Q-01	MRPS6	BLCA	Yes	No	No	No	No
TCGA-BT-A20Q-01	MRS2	BLCA	Yes	No	No	No	No
TCGA-BT-A20Q-01	MTA3	BLCA	Yes	No	No	No	No
TCGA-BT-A20Q-01	NADSYN1	BLCA	Yes	No	No	No	No
TCGA-BT-A20Q-01	NFASC	BLCA	Yes	No	No	No	No
TCGA-BT-A20Q-01	NIT1	BLCA	Yes	No	No	No	No
TCGA-BT-A20Q-01	NME1-NME2	BLCA	Yes	No	No	No	No
TCGA-BT-A20Q-01	NPM1	BLCA	Yes	No	No	Yes	Yes
TCGA-BT-A20Q-01	NSMCE2	BLCA	Yes	No	No	No	No
TCGA-BT-A20Q-01	NSUN7	BLCA	Yes	No	No	No	No
TCGA-BT-A20Q-01	NUDT15	BLCA	Yes	No	No	No	No
TCGA-BT-A20Q-01	OGG1	BLCA	Yes	No	No	Yes	No
TCGA-BT-A20Q-01	PABPC1L	BLCA	Yes	No	No	No	No
TCGA-BT-A20Q-01	PAIP2	BLCA	Yes	No	No	No	No
TCGA-BT-A20Q-01	PAK3	BLCA	Yes	No	No	No	No
TCGA-BT-A20Q-01	PANK2	BLCA	Yes	No	No	No	No
TCGA-BT-A20Q-01	PAPOLA	BLCA	Yes	No	No	No	No
TCGA-BT-A20Q-01	PBX1	BLCA	Yes	No	No	No	No
TCGA-BT-A20Q-01	PCDH7	BLCA	Yes	No	No	No	Yes
TCGA-BT-A20Q-01	PCGF3	BLCA	Yes	No	No	No	No
TCGA-BT-A20Q-01	PCGF5	BLCA	Yes	No	No	No	No
TCGA-BT-A20Q-01	PCM1	BLCA	Yes	No	No	No	No
TCGA-BT-A20Q-01	PCMT1	BLCA	Yes	No	No	No	No
TCGA-BT-A20Q-01	PCNX4	BLCA	Yes	No	No	No	No
TCGA-BT-A20Q-01	PCTP	BLCA	Yes	No	No	No	No
TCGA-BT-A20Q-01	PDCD11	BLCA	Yes	No	No	No	No
TCGA-BT-A20Q-01	PDE3A	BLCA	Yes	No	No	No	No
TCGA-BT-A20Q-01	PDK2	BLCA	Yes	No	No	No	No
TCGA-BT-A20Q-01	PDK3	BLCA	Yes	No	No	No	No
TCGA-BT-A20Q-01	PEX13	BLCA	Yes	No	No	No	No
TCGA-BT-A20Q-01	PIBF1	BLCA	Yes	No	No	No	No
TCGA-BT-A20Q-01	PLCB3	BLCA	Yes	No	No	No	No
TCGA-BT-A20Q-01	PLEKHA8	BLCA	Yes	No	No	No	No
TCGA-BT-A20Q-01	POLI	BLCA	Yes	Yes	Yes	Yes	No
TCGA-BT-A20Q-01	POLR1D	BLCA	Yes	No	No	No	No
TCGA-BT-A20Q-01	POLR2F	BLCA	Yes	No	No	No	No
TCGA-BT-A20Q-01	PPAN-P2RY11	BLCA	Yes	No	No	No	No
TCGA-BT-A20Q-01	PPARA	BLCA	Yes	No	No	No	No
TCGA-BT-A20Q-01	PPFIBP2	BLCA	Yes	No	No	No	No
TCGA-BT-A20Q-01	PPIE	BLCA	Yes	No	No	No	No
TCGA-BT-A20Q-01	PPP1R3F	BLCA	Yes	No	No	No	No
TCGA-BT-A20Q-01	PPP2R5C	BLCA	Yes	No	No	No	No
TCGA-BT-A20Q-01	PRMT2	BLCA	Yes	No	No	No	No
TCGA-BT-A20Q-01	RAB3GAP1	BLCA	Yes	No	No	No	No
TCGA-BT-A20Q-01	RABGEF1	BLCA	Yes	No	No	No	No
TCGA-BT-A20Q-01	RAD51B	BLCA	Yes	No	No	Yes	No
TCGA-BT-A20Q-01	RAD51C	BLCA	Yes	No	No	Yes	No
TCGA-BT-A20Q-01	RBCK1	BLCA	Yes	No	No	No	No
TCGA-BT-A20Q-01	RCOR3	BLCA	Yes	No	No	No	No
TCGA-BT-A20Q-01	RGS12	BLCA	Yes	No	No	No	Yes
TCGA-BT-A20Q-01	RNASE4	BLCA	Yes	No	No	No	No
TCGA-BT-A20Q-01	RNASEH2B	BLCA	Yes	No	No	No	No
TCGA-BT-A20Q-01	RPA1	BLCA	Yes	No	No	Yes	No
TCGA-BT-A20Q-01	RPP30	BLCA	Yes	No	No	No	No
TCGA-BT-A20Q-01	RYR2	BLCA	Yes	No	No	No	No
TCGA-BT-A20Q-01	SARS	BLCA	Yes	No	No	No	No
TCGA-BT-A20Q-01	SCARA3	BLCA	Yes	No	No	No	No
TCGA-BT-A20Q-01	SCFD1	BLCA	Yes	No	No	No	No
TCGA-BT-A20Q-01	SCLY	BLCA	Yes	No	No	No	No
TCGA-BT-A20Q-01	SDCCAG8	BLCA	Yes	No	No	No	No
TCGA-BT-A20Q-01	SEC22A	BLCA	Yes	No	No	No	Yes
TCGA-BT-A20Q-01	SGSM1	BLCA	Yes	No	No	No	No
TCGA-BT-A20Q-01	SIN3B	BLCA	Yes	No	No	No	No
TCGA-BT-A20Q-01	SLC24A1	BLCA	Yes	No	No	No	No
TCGA-BT-A20Q-01	SLC30A9	BLCA	Yes	No	No	Yes	No
TCGA-BT-A20Q-01	SLC35F1	BLCA	Yes	No	No	No	No
TCGA-BT-A20Q-01	SLC44A1	BLCA	Yes	No	No	No	No
TCGA-BT-A20Q-01	SLF2	BLCA	Yes	No	No	No	No
TCGA-BT-A20Q-01	SNX1	BLCA	Yes	No	No	No	No
TCGA-BT-A20Q-01	SNX24	BLCA	Yes	No	No	No	No
TCGA-BT-A20Q-01	SRR	BLCA	Yes	No	No	No	No
TCGA-BT-A20Q-01	SWT1	BLCA	Yes	No	No	No	No
TCGA-BT-A20Q-01	SYNJ2	BLCA	Yes	No	No	No	No
TCGA-BT-A20Q-01	TANC1	BLCA	Yes	No	No	No	No
TCGA-BT-A20Q-01	TBC1D17	BLCA	Yes	No	No	No	No
TCGA-BT-A20Q-01	TBCE	BLCA	Yes	No	No	No	No
TCGA-BT-A20Q-01	TCAIM	BLCA	Yes	No	No	No	No
TCGA-BT-A20Q-01	TF	BLCA	Yes	No	No	No	No
TCGA-BT-A20Q-01	TOM1L1	BLCA	Yes	No	No	No	No
TCGA-BT-A20Q-01	TRAPPC13	BLCA	Yes	No	No	No	No
TCGA-BT-A20Q-01	TRIOBP	BLCA	Yes	No	No	No	No
TCGA-BT-A20Q-01	TRNT1	BLCA	Yes	No	No	No	No
TCGA-BT-A20Q-01	TSFM	BLCA	Yes	No	No	No	No
TCGA-BT-A20Q-01	UBE3B	BLCA	Yes	No	No	No	No
TCGA-BT-A20Q-01	WBP2NL	BLCA	Yes	No	No	No	No
TCGA-BT-A20Q-01	WDR20	BLCA	Yes	No	No	No	No
TCGA-BT-A20Q-01	WNK2	BLCA	Yes	No	No	No	No
TCGA-BT-A20Q-01	XYLB	BLCA	Yes	No	No	No	No
TCGA-BT-A20Q-01	YLPM1	BLCA	Yes	No	No	No	Yes
TCGA-BT-A20Q-01	ZCCHC2	BLCA	Yes	No	No	No	No
TCGA-BT-A20Q-01	ZCWPW2	BLCA	Yes	No	No	No	No
TCGA-BT-A20Q-01	ZFP2	BLCA	Yes	No	No	No	No
TCGA-BT-A20Q-01	ZNF107	BLCA	Yes	No	No	No	No
TCGA-BT-A20Q-01	ZNF174	BLCA	Yes	No	No	No	No
TCGA-BT-A20Q-01	ZNF197	BLCA	Yes	No	No	No	No
TCGA-BT-A20Q-01	ZNF273	BLCA	Yes	No	No	No	No
TCGA-BT-A20Q-01	ZNF346	BLCA	Yes	No	No	No	No
TCGA-BT-A20Q-01	ZNF37A	BLCA	Yes	No	No	No	No
TCGA-BT-A20Q-01	ZNF397	BLCA	Yes	No	No	No	No
TCGA-BT-A20Q-01	ZNF451	BLCA	Yes	No	No	No	No
TCGA-BT-A20Q-01	ZNF454	BLCA	Yes	No	No	No	No
TCGA-BT-A20Q-01	ZNF540	BLCA	Yes	No	No	No	No
TCGA-BT-A20Q-01	ZNF568	BLCA	Yes	No	No	No	No
TCGA-BT-A20Q-01	ZNF596	BLCA	Yes	No	No	No	No
TCGA-BT-A20Q-01	ZNF655	BLCA	Yes	No	No	No	No
TCGA-BT-A20Q-01	ZNF660-ZNF197	BLCA	Yes	No	No	No	No
TCGA-BT-A20Q-01	ZNF718	BLCA	Yes	No	No	No	No
TCGA-BT-A20Q-01	ZNF720	BLCA	Yes	No	No	No	No
TCGA-BT-A20Q-01	ZNF862	BLCA	Yes	No	No	No	No
TCGA-BT-A20R-01	AAMDC	BLCA	Yes	No	No	No	No
TCGA-BT-A20R-01	ABCD3	BLCA	Yes	No	No	No	No
TCGA-BT-A20R-01	ABL1	BLCA	Yes	No	No	Yes	No
TCGA-BT-A20R-01	ACOT11	BLCA	Yes	No	No	No	No
TCGA-BT-A20R-01	AGO3	BLCA	Yes	No	No	No	No
TCGA-BT-A20R-01	AK7	BLCA	Yes	No	No	No	No
TCGA-BT-A20R-01	AKAP6	BLCA	Yes	No	No	No	No
TCGA-BT-A20R-01	ANKDD1A	BLCA	Yes	No	No	No	No
TCGA-BT-A20R-01	ANKRD12	BLCA	Yes	No	No	No	No
TCGA-BT-A20R-01	ANTXR1	BLCA	Yes	No	No	No	No
TCGA-BT-A20R-01	APLF	BLCA	Yes	No	No	Yes	No
TCGA-BT-A20R-01	APOPT1	BLCA	Yes	No	No	No	No
TCGA-BT-A20R-01	ARMC2	BLCA	Yes	No	No	No	No
TCGA-BT-A20R-01	ARMC9	BLCA	Yes	No	No	No	No
TCGA-BT-A20R-01	ATG7	BLCA	Yes	No	No	No	No
TCGA-BT-A20R-01	ATP11B	BLCA	Yes	No	No	No	No
TCGA-BT-A20R-01	ATP2A2	BLCA	Yes	No	No	No	No
TCGA-BT-A20R-01	ATP5S	BLCA	Yes	No	No	No	No
TCGA-BT-A20R-01	BBS1	BLCA	Yes	No	No	No	No
TCGA-BT-A20R-01	BBS9	BLCA	Yes	No	No	No	No
TCGA-BT-A20R-01	BCAP29	BLCA	Yes	No	No	No	No
TCGA-BT-A20R-01	BCCIP	BLCA	Yes	No	No	No	No
TCGA-BT-A20R-01	BICD1	BLCA	Yes	No	No	No	No
TCGA-BT-A20R-01	BPTF	BLCA	Yes	No	No	No	No
TCGA-BT-A20R-01	BUB1B-PAK6	BLCA	Yes	No	No	No	No
TCGA-BT-A20R-01	C11orf49	BLCA	Yes	No	No	No	No
TCGA-BT-A20R-01	C16orf52	BLCA	Yes	No	No	No	No
TCGA-BT-A20R-01	C2orf27A	BLCA	Yes	No	No	No	No
TCGA-BT-A20R-01	C8orf44	BLCA	Yes	No	No	No	No
TCGA-BT-A20R-01	C9orf3	BLCA	Yes	No	No	No	No
TCGA-BT-A20R-01	CAMK1D	BLCA	Yes	No	No	No	No
TCGA-BT-A20R-01	CBWD2	BLCA	Yes	No	No	No	No
TCGA-BT-A20R-01	CCDC138	BLCA	Yes	No	No	No	No
TCGA-BT-A20R-01	CCDC157	BLCA	Yes	No	No	No	No
TCGA-BT-A20R-01	CCDC18	BLCA	Yes	No	No	No	No
TCGA-BT-A20R-01	CCDC30	BLCA	Yes	No	No	No	No
TCGA-BT-A20R-01	CCDC50	BLCA	Yes	No	No	No	No
TCGA-BT-A20R-01	CCDC66	BLCA	Yes	No	No	No	No
TCGA-BT-A20R-01	CDC45	BLCA	Yes	No	No	No	No
TCGA-BT-A20R-01	CDH23	BLCA	Yes	No	No	No	No
TCGA-BT-A20R-01	CEP68	BLCA	Yes	No	No	No	No
TCGA-BT-A20R-01	CEP72	BLCA	Yes	No	No	No	No
TCGA-BT-A20R-01	CEP78	BLCA	Yes	No	No	No	No
TCGA-BT-A20R-01	CEP95	BLCA	Yes	No	No	No	No
TCGA-BT-A20R-01	CFLAR	BLCA	Yes	No	No	No	No
TCGA-BT-A20R-01	CHD9	BLCA	Yes	No	No	No	No
TCGA-BT-A20R-01	CLEC16A	BLCA	Yes	No	No	No	No
TCGA-BT-A20R-01	CLIP4	BLCA	Yes	No	No	No	No
TCGA-BT-A20R-01	CLYBL	BLCA	Yes	No	No	No	No
TCGA-BT-A20R-01	CNIH4	BLCA	Yes	No	No	No	No
TCGA-BT-A20R-01	CNNM2	BLCA	Yes	No	No	No	No
TCGA-BT-A20R-01	CNPY3-GNMT	BLCA	Yes	No	No	No	No
TCGA-BT-A20R-01	CNTLN	BLCA	Yes	No	No	No	No
TCGA-BT-A20R-01	CROT	BLCA	Yes	No	No	No	No
TCGA-BT-A20R-01	CRTC3	BLCA	Yes	No	No	No	No
TCGA-BT-A20R-01	CUL4A	BLCA	Yes	No	No	No	No
TCGA-BT-A20R-01	CYB561D2	BLCA	Yes	No	No	No	No
TCGA-BT-A20R-01	CYFIP2	BLCA	Yes	No	No	No	No
TCGA-BT-A20R-01	DBF4B	BLCA	Yes	No	No	No	No
TCGA-BT-A20R-01	DCP2	BLCA	Yes	No	No	No	No
TCGA-BT-A20R-01	DGKE	BLCA	Yes	No	No	No	No
TCGA-BT-A20R-01	DGLUCY	BLCA	Yes	No	No	No	No
TCGA-BT-A20R-01	DISP1	BLCA	Yes	No	No	No	No
TCGA-BT-A20R-01	DNAH10	BLCA	Yes	No	No	No	No
TCGA-BT-A20R-01	DNAJB4	BLCA	Yes	No	No	No	No
TCGA-BT-A20R-01	DNHD1	BLCA	Yes	No	No	No	No
TCGA-BT-A20R-01	DPY19L4	BLCA	Yes	No	No	No	Yes
TCGA-BT-A20R-01	DTNA	BLCA	Yes	No	No	No	No
TCGA-BT-A20R-01	DTWD1	BLCA	Yes	No	No	No	No
TCGA-BT-A20R-01	EIF2B5	BLCA	Yes	No	No	No	No
TCGA-BT-A20R-01	EIF4E2	BLCA	Yes	No	No	No	No
TCGA-BT-A20R-01	ELAC1	BLCA	Yes	No	No	No	No
TCGA-BT-A20R-01	ENDOV	BLCA	Yes	No	No	Yes	No
TCGA-BT-A20R-01	EPB41L5	BLCA	Yes	No	No	No	No
TCGA-BT-A20R-01	ERCC4	BLCA	Yes	No	No	Yes	No
TCGA-BT-A20R-01	ERCC6L2	BLCA	Yes	No	No	Yes	No
TCGA-BT-A20R-01	FAHD2A	BLCA	Yes	No	No	No	No
TCGA-BT-A20R-01	FAM185A	BLCA	Yes	No	No	No	No
TCGA-BT-A20R-01	FAM228B	BLCA	Yes	No	No	No	No
TCGA-BT-A20R-01	FAN1	BLCA	Yes	No	No	Yes	No
TCGA-BT-A20R-01	FANCI	BLCA	Yes	No	No	Yes	No
TCGA-BT-A20R-01	FARP1	BLCA	Yes	No	No	No	No
TCGA-BT-A20R-01	FARP2	BLCA	Yes	No	No	No	No
TCGA-BT-A20R-01	FBLN1	BLCA	Yes	No	No	No	No
TCGA-BT-A20R-01	FLAD1	BLCA	Yes	No	No	No	No
TCGA-BT-A20R-01	FMR1	BLCA	Yes	No	No	No	No
TCGA-BT-A20R-01	FOXK1	BLCA	Yes	No	No	No	No
TCGA-BT-A20R-01	FPGT-TNNI3K	BLCA	Yes	No	No	No	No
TCGA-BT-A20R-01	FXR1	BLCA	Yes	No	No	No	No
TCGA-BT-A20R-01	GCNT2	BLCA	Yes	No	No	No	No
TCGA-BT-A20R-01	GFM1	BLCA	Yes	No	No	No	No
TCGA-BT-A20R-01	GGPS1	BLCA	Yes	No	No	No	No
TCGA-BT-A20R-01	GLDN	BLCA	Yes	No	No	No	No
TCGA-BT-A20R-01	GNAL	BLCA	Yes	No	No	No	No
TCGA-BT-A20R-01	GOSR2	BLCA	Yes	No	No	No	No
TCGA-BT-A20R-01	GPATCH2L	BLCA	Yes	No	No	No	No
TCGA-BT-A20R-01	GPSM2	BLCA	Yes	No	No	No	No
TCGA-BT-A20R-01	GRAP2	BLCA	Yes	No	No	No	No
TCGA-BT-A20R-01	GSTM4	BLCA	Yes	No	No	No	No
TCGA-BT-A20R-01	GVQW3	BLCA	Yes	No	No	No	No
TCGA-BT-A20R-01	HEXB	BLCA	Yes	No	No	No	No
TCGA-BT-A20R-01	HNMT	BLCA	Yes	No	No	No	No
TCGA-BT-A20R-01	HNRNPA3	BLCA	Yes	No	No	No	No
TCGA-BT-A20R-01	HS3ST3B1	BLCA	Yes	No	No	No	No
TCGA-BT-A20R-01	HSPE1-MOB4	BLCA	Yes	No	No	No	No
TCGA-BT-A20R-01	IFT43	BLCA	Yes	No	No	No	No
TCGA-BT-A20R-01	IL18R1	BLCA	Yes	No	No	No	No
TCGA-BT-A20R-01	INF2	BLCA	Yes	No	No	No	No
TCGA-BT-A20R-01	ING3	BLCA	Yes	No	No	No	No
TCGA-BT-A20R-01	ING5	BLCA	Yes	No	No	No	No
TCGA-BT-A20R-01	IQCH	BLCA	Yes	No	No	No	No
TCGA-BT-A20R-01	ITGA1	BLCA	Yes	No	No	No	No
TCGA-BT-A20R-01	ITGB8	BLCA	Yes	No	No	No	No
TCGA-BT-A20R-01	IVD	BLCA	Yes	No	No	No	No
TCGA-BT-A20R-01	KALRN	BLCA	Yes	No	No	No	No
TCGA-BT-A20R-01	KCTD2	BLCA	Yes	No	No	No	No
TCGA-BT-A20R-01	KCTD3	BLCA	Yes	No	No	No	No
TCGA-BT-A20R-01	KIAA0232	BLCA	Yes	No	No	No	No
TCGA-BT-A20R-01	KIAA1841	BLCA	Yes	No	No	No	No
TCGA-BT-A20R-01	KIF1B	BLCA	Yes	No	No	No	No
TCGA-BT-A20R-01	KLC1	BLCA	Yes	No	No	No	No
TCGA-BT-A20R-01	KLF3	BLCA	Yes	No	No	No	No
TCGA-BT-A20R-01	KLHL18	BLCA	Yes	No	No	No	No
TCGA-BT-A20R-01	KLHL36	BLCA	Yes	No	No	No	No
TCGA-BT-A20R-01	KMT2E	BLCA	Yes	No	No	No	No
TCGA-BT-A20R-01	L3MBTL1	BLCA	Yes	No	No	No	No
TCGA-BT-A20R-01	LDB3	BLCA	Yes	No	No	No	No
TCGA-BT-A20R-01	LHPP	BLCA	Yes	No	No	No	No
TCGA-BT-A20R-01	LRCH3	BLCA	Yes	No	No	No	No
TCGA-BT-A20R-01	LRRC27	BLCA	Yes	No	No	No	No
TCGA-BT-A20R-01	MAP3K8	BLCA	Yes	No	No	No	No
TCGA-BT-A20R-01	MBD5	BLCA	Yes	No	No	No	No
TCGA-BT-A20R-01	MINDY4	BLCA	Yes	No	No	No	No
TCGA-BT-A20R-01	MKL2	BLCA	Yes	No	No	No	No
TCGA-BT-A20R-01	MPI	BLCA	Yes	No	No	No	No
TCGA-BT-A20R-01	MPND	BLCA	Yes	No	No	No	No
TCGA-BT-A20R-01	MRPL37	BLCA	Yes	No	No	No	No
TCGA-BT-A20R-01	MTA3	BLCA	Yes	No	No	No	No
TCGA-BT-A20R-01	MTHFD2L	BLCA	Yes	No	No	No	No
TCGA-BT-A20R-01	MVP	BLCA	Yes	No	No	No	No
TCGA-BT-A20R-01	NBPF3	BLCA	Yes	No	No	No	No
TCGA-BT-A20R-01	NDST1	BLCA	Yes	No	No	No	No
TCGA-BT-A20R-01	NDUFAF6	BLCA	Yes	No	No	No	No
TCGA-BT-A20R-01	NFASC	BLCA	Yes	No	No	No	No
TCGA-BT-A20R-01	NFE2L3	BLCA	Yes	No	No	No	No
TCGA-BT-A20R-01	NHLRC3	BLCA	Yes	No	No	No	No
TCGA-BT-A20R-01	NIPAL3	BLCA	Yes	No	No	No	No
TCGA-BT-A20R-01	NLRC5	BLCA	Yes	No	No	No	No
TCGA-BT-A20R-01	NME1-NME2	BLCA	Yes	No	No	No	No
TCGA-BT-A20R-01	NNT	BLCA	Yes	No	No	No	No
TCGA-BT-A20R-01	NOL7	BLCA	Yes	No	No	No	No
TCGA-BT-A20R-01	NOM1	BLCA	Yes	No	No	No	No
TCGA-BT-A20R-01	NPM1	BLCA	Yes	No	No	Yes	Yes
TCGA-BT-A20R-01	NTNG1	BLCA	Yes	No	No	No	No
TCGA-BT-A20R-01	NUDT15	BLCA	Yes	No	No	No	No
TCGA-BT-A20R-01	OAS1	BLCA	Yes	No	No	No	No
TCGA-BT-A20R-01	OAS2	BLCA	Yes	No	No	No	No
TCGA-BT-A20R-01	OPTN	BLCA	Yes	No	No	No	No
TCGA-BT-A20R-01	ORC3	BLCA	Yes	No	No	No	No
TCGA-BT-A20R-01	OSBPL2	BLCA	Yes	No	No	No	No
TCGA-BT-A20R-01	PAIP2	BLCA	Yes	No	No	No	No
TCGA-BT-A20R-01	PANK2	BLCA	Yes	No	No	No	No
TCGA-BT-A20R-01	PAPOLA	BLCA	Yes	No	No	No	No
TCGA-BT-A20R-01	PATJ	BLCA	Yes	No	No	No	No
TCGA-BT-A20R-01	PBX1	BLCA	Yes	No	No	No	No
TCGA-BT-A20R-01	PCDH11X	BLCA	Yes	No	No	No	No
TCGA-BT-A20R-01	PCDH11Y	BLCA	Yes	No	No	No	No
TCGA-BT-A20R-01	PCDH7	BLCA	Yes	No	No	No	Yes
TCGA-BT-A20R-01	PCGF3	BLCA	Yes	No	No	No	No
TCGA-BT-A20R-01	PCGF5	BLCA	Yes	No	No	No	No
TCGA-BT-A20R-01	PCM1	BLCA	Yes	No	No	No	No
TCGA-BT-A20R-01	PCMT1	BLCA	Yes	No	No	No	No
TCGA-BT-A20R-01	PCTP	BLCA	Yes	No	No	No	No
TCGA-BT-A20R-01	PDE3A	BLCA	Yes	No	No	No	No
TCGA-BT-A20R-01	PDE9A	BLCA	Yes	No	No	No	No
TCGA-BT-A20R-01	PDK2	BLCA	Yes	No	No	No	No
TCGA-BT-A20R-01	PDK3	BLCA	Yes	No	No	No	No
TCGA-BT-A20R-01	PIBF1	BLCA	Yes	No	No	No	No
TCGA-BT-A20R-01	PIGX	BLCA	Yes	No	No	No	No
TCGA-BT-A20R-01	PIN4	BLCA	Yes	No	No	No	No
TCGA-BT-A20R-01	PJVK	BLCA	Yes	No	No	No	No
TCGA-BT-A20R-01	PLCB3	BLCA	Yes	No	No	No	No
TCGA-BT-A20R-01	PML	BLCA	Yes	No	No	No	No
TCGA-BT-A20R-01	POLI	BLCA	Yes	No	No	Yes	No
TCGA-BT-A20R-01	POLR2F	BLCA	Yes	No	No	No	No
TCGA-BT-A20R-01	PPARA	BLCA	Yes	No	No	No	No
TCGA-BT-A20R-01	PPFIA1	BLCA	Yes	No	No	No	No
TCGA-BT-A20R-01	PPFIBP2	BLCA	Yes	No	No	No	No
TCGA-BT-A20R-01	PPIE	BLCA	Yes	No	No	No	No
TCGA-BT-A20R-01	PPP1R7	BLCA	Yes	No	No	No	No
TCGA-BT-A20R-01	PPP2R5C	BLCA	Yes	No	No	No	No
TCGA-BT-A20R-01	PQLC2L	BLCA	Yes	No	No	No	No
TCGA-BT-A20R-01	PRKACB	BLCA	Yes	No	No	No	No
TCGA-BT-A20R-01	PRKRIP1	BLCA	Yes	No	No	No	No
TCGA-BT-A20R-01	PRMT2	BLCA	Yes	No	No	No	No
TCGA-BT-A20R-01	RAB3GAP1	BLCA	Yes	No	No	No	No
TCGA-BT-A20R-01	RABEP1	BLCA	Yes	No	No	No	No
TCGA-BT-A20R-01	RAD50	BLCA	Yes	No	No	Yes	No
TCGA-BT-A20R-01	RAD51B	BLCA	Yes	No	No	Yes	No
TCGA-BT-A20R-01	RAD51C	BLCA	Yes	No	No	Yes	No
TCGA-BT-A20R-01	RBM33	BLCA	Yes	No	No	No	No
TCGA-BT-A20R-01	RCOR3	BLCA	Yes	No	No	No	No
TCGA-BT-A20R-01	RECK	BLCA	Yes	No	No	No	No
TCGA-BT-A20R-01	RFC3	BLCA	Yes	No	No	Yes	No
TCGA-BT-A20R-01	RGS12	BLCA	Yes	No	No	No	Yes
TCGA-BT-A20R-01	RHBDD1	BLCA	Yes	No	No	No	No
TCGA-BT-A20R-01	RMDN2	BLCA	Yes	No	No	No	No
TCGA-BT-A20R-01	RNASE4	BLCA	Yes	No	No	No	No
TCGA-BT-A20R-01	RNASEH2B	BLCA	Yes	No	No	No	No
TCGA-BT-A20R-01	RNF165	BLCA	Yes	No	No	No	No
TCGA-BT-A20R-01	RPP30	BLCA	Yes	No	No	No	No
TCGA-BT-A20R-01	RRNAD1	BLCA	Yes	No	No	No	No
TCGA-BT-A20R-01	RYR2	BLCA	Yes	No	No	No	No
TCGA-BT-A20R-01	SCARA3	BLCA	Yes	No	No	No	No
TCGA-BT-A20R-01	SCLY	BLCA	Yes	No	No	No	No
TCGA-BT-A20R-01	SDCCAG8	BLCA	Yes	No	No	No	No
TCGA-BT-A20R-01	SEC22A	BLCA	Yes	No	No	No	Yes
TCGA-BT-A20R-01	SETMAR	BLCA	Yes	No	No	No	No
TCGA-BT-A20R-01	SGSM1	BLCA	Yes	No	No	No	No
TCGA-BT-A20R-01	SIN3B	BLCA	Yes	No	No	No	No
TCGA-BT-A20R-01	SLC25A37	BLCA	Yes	No	No	No	No
TCGA-BT-A20R-01	SLC30A9	BLCA	Yes	No	No	Yes	No
TCGA-BT-A20R-01	SLC35A3	BLCA	Yes	No	No	No	No
TCGA-BT-A20R-01	SLC35F1	BLCA	Yes	No	No	No	No
TCGA-BT-A20R-01	SLC38A6	BLCA	Yes	No	No	No	No
TCGA-BT-A20R-01	SLC44A1	BLCA	Yes	No	No	No	No
TCGA-BT-A20R-01	SNX1	BLCA	Yes	No	No	No	No
TCGA-BT-A20R-01	SNX24	BLCA	Yes	No	No	No	No
TCGA-BT-A20R-01	SP100	BLCA	Yes	No	No	No	No
TCGA-BT-A20R-01	SRR	BLCA	Yes	No	No	No	No
TCGA-BT-A20R-01	STXBP1	BLCA	Yes	No	No	No	No
TCGA-BT-A20R-01	SYNGR1	BLCA	Yes	No	No	No	No
TCGA-BT-A20R-01	SYNJ2	BLCA	Yes	No	No	No	No
TCGA-BT-A20R-01	SYS1	BLCA	Yes	No	No	No	No
TCGA-BT-A20R-01	TANC1	BLCA	Yes	No	No	No	No
TCGA-BT-A20R-01	TANK	BLCA	Yes	No	No	No	No
TCGA-BT-A20R-01	TBCE	BLCA	Yes	No	No	No	No
TCGA-BT-A20R-01	TBP	BLCA	Yes	No	No	No	No
TCGA-BT-A20R-01	TCAIM	BLCA	Yes	No	No	No	No
TCGA-BT-A20R-01	TCEANC2	BLCA	Yes	No	No	No	No
TCGA-BT-A20R-01	TECPR2	BLCA	Yes	No	No	No	No
TCGA-BT-A20R-01	TF	BLCA	Yes	No	No	No	No
TCGA-BT-A20R-01	TMCO3	BLCA	Yes	No	No	No	No
TCGA-BT-A20R-01	TMEM91	BLCA	Yes	No	No	No	No
TCGA-BT-A20R-01	TOM1L1	BLCA	Yes	No	No	No	No
TCGA-BT-A20R-01	TRAPPC10	BLCA	Yes	No	No	No	No
TCGA-BT-A20R-01	TRAPPC13	BLCA	Yes	No	No	No	No
TCGA-BT-A20R-01	TSFM	BLCA	Yes	No	No	No	No
TCGA-BT-A20R-01	UBE2D4	BLCA	Yes	No	No	No	No
TCGA-BT-A20R-01	VWA5A	BLCA	Yes	No	No	No	No
TCGA-BT-A20R-01	WBP2NL	BLCA	Yes	No	No	No	No
TCGA-BT-A20R-01	WDR20	BLCA	Yes	No	No	No	No
TCGA-BT-A20R-01	WNK2	BLCA	Yes	No	No	No	No
TCGA-BT-A20R-01	WRB-SH3BGR	BLCA	Yes	No	No	No	No
TCGA-BT-A20R-01	WWOX	BLCA	Yes	No	No	No	No
TCGA-BT-A20R-01	XYLB	BLCA	Yes	No	No	No	No
TCGA-BT-A20R-01	YLPM1	BLCA	Yes	No	No	No	Yes
TCGA-BT-A20R-01	ZNF138	BLCA	Yes	No	No	No	No
TCGA-BT-A20R-01	ZNF346	BLCA	Yes	No	No	No	No
TCGA-BT-A20R-01	ZNF397	BLCA	Yes	No	No	No	No
TCGA-BT-A20R-01	ZNF540	BLCA	Yes	No	No	No	No
TCGA-BT-A20R-01	ZNF544	BLCA	Yes	No	No	No	No
TCGA-BT-A20R-01	ZNF568	BLCA	Yes	No	No	No	No
TCGA-BT-A20R-01	ZNF596	BLCA	Yes	No	No	No	No
TCGA-BT-A20R-01	ZNF655	BLCA	Yes	No	No	No	No
TCGA-BT-A20R-01	ZNF678	BLCA	Yes	No	No	No	No
TCGA-BT-A20R-01	ZNF718	BLCA	Yes	No	No	No	No
TCGA-BT-A20R-01	ZNF862	BLCA	Yes	No	No	No	No
TCGA-BT-A20R-01	ZSCAN2	BLCA	Yes	No	No	No	No
TCGA-BT-A20R-01	ZSCAN25	BLCA	Yes	No	No	No	No
TCGA-BT-A20U-01	ACO2	BLCA	Yes	No	No	No	No
TCGA-BT-A20U-01	ADGRL3	BLCA	Yes	No	No	No	No
TCGA-BT-A20U-01	AGAP11	BLCA	Yes	No	No	No	No
TCGA-BT-A20U-01	AP4E1	BLCA	Yes	No	No	No	No
TCGA-BT-A20U-01	ARHGEF17	BLCA	Yes	No	No	No	No
TCGA-BT-A20U-01	BBS1	BLCA	Yes	No	No	No	No
TCGA-BT-A20U-01	BCCIP	BLCA	Yes	No	No	No	No
TCGA-BT-A20U-01	BICD1	BLCA	Yes	No	No	No	No
TCGA-BT-A20U-01	BIVM-ERCC5	BLCA	Yes	No	No	No	No
TCGA-BT-A20U-01	BPHL	BLCA	Yes	No	No	No	No
TCGA-BT-A20U-01	BPTF	BLCA	Yes	No	No	No	No
TCGA-BT-A20U-01	BUB1B-PAK6	BLCA	Yes	No	No	No	No
TCGA-BT-A20U-01	C11orf70	BLCA	Yes	No	No	No	No
TCGA-BT-A20U-01	C5orf24	BLCA	Yes	No	No	No	No
TCGA-BT-A20U-01	C9orf3	BLCA	Yes	No	No	No	No
TCGA-BT-A20U-01	CAMSAP2	BLCA	Yes	No	No	No	No
TCGA-BT-A20U-01	CCDC50	BLCA	Yes	No	No	No	No
TCGA-BT-A20U-01	CCDC66	BLCA	Yes	No	No	No	No
TCGA-BT-A20U-01	CDC45	BLCA	Yes	No	No	No	No
TCGA-BT-A20U-01	CEP57	BLCA	Yes	No	No	No	No
TCGA-BT-A20U-01	CEP68	BLCA	Yes	No	No	No	No
TCGA-BT-A20U-01	CHRNA5	BLCA	Yes	No	No	No	No
TCGA-BT-A20U-01	CHURC1-FNTB	BLCA	Yes	No	No	No	No
TCGA-BT-A20U-01	CLIP4	BLCA	Yes	No	No	No	No
TCGA-BT-A20U-01	CXADR	BLCA	Yes	No	No	No	No
TCGA-BT-A20U-01	CYFIP2	BLCA	Yes	No	No	No	No
TCGA-BT-A20U-01	CYP4V2	BLCA	Yes	No	No	No	No
TCGA-BT-A20U-01	DCBLD1	BLCA	Yes	No	No	No	No
TCGA-BT-A20U-01	DISP1	BLCA	Yes	No	No	No	No
TCGA-BT-A20U-01	DMXL1	BLCA	Yes	No	No	No	No
TCGA-BT-A20U-01	DNAJB4	BLCA	Yes	No	No	No	No
TCGA-BT-A20U-01	DNHD1	BLCA	Yes	No	No	No	No
TCGA-BT-A20U-01	DTWD1	BLCA	Yes	No	No	No	No
TCGA-BT-A20U-01	EGFR	BLCA	Yes	No	No	No	No
TCGA-BT-A20U-01	EPB41L5	BLCA	Yes	No	No	No	No
TCGA-BT-A20U-01	ERI1	BLCA	Yes	No	No	No	No
TCGA-BT-A20U-01	EVA1C	BLCA	Yes	No	No	No	No
TCGA-BT-A20U-01	FAM20C	BLCA	Yes	No	No	No	No
TCGA-BT-A20U-01	FAM234A	BLCA	Yes	No	No	No	No
TCGA-BT-A20U-01	FANCI	BLCA	Yes	No	No	Yes	No
TCGA-BT-A20U-01	FMN2	BLCA	Yes	No	No	No	No
TCGA-BT-A20U-01	FXR1	BLCA	Yes	No	No	No	No
TCGA-BT-A20U-01	GARNL3	BLCA	Yes	No	No	No	No
TCGA-BT-A20U-01	GGPS1	BLCA	Yes	No	No	No	No
TCGA-BT-A20U-01	GLDN	BLCA	Yes	No	No	No	No
TCGA-BT-A20U-01	GPC6	BLCA	Yes	No	No	No	No
TCGA-BT-A20U-01	GRAP2	BLCA	Yes	No	No	No	No
TCGA-BT-A20U-01	HNMT	BLCA	Yes	No	No	No	No
TCGA-BT-A20U-01	HSPA14	BLCA	Yes	No	No	No	No
TCGA-BT-A20U-01	ITGA1	BLCA	Yes	No	No	No	No
TCGA-BT-A20U-01	ITGB8	BLCA	Yes	No	No	No	No
TCGA-BT-A20U-01	IVD	BLCA	Yes	No	No	No	No
TCGA-BT-A20U-01	KCNIP3	BLCA	Yes	No	No	No	No
TCGA-BT-A20U-01	KIAA0232	BLCA	Yes	No	No	No	No
TCGA-BT-A20U-01	KIAA0586	BLCA	Yes	No	No	No	No
TCGA-BT-A20U-01	KLF3	BLCA	Yes	No	No	No	No
TCGA-BT-A20U-01	KLHL24	BLCA	Yes	No	No	No	No
TCGA-BT-A20U-01	L3MBTL1	BLCA	Yes	No	No	No	No
TCGA-BT-A20U-01	LAMA3	BLCA	Yes	No	No	No	No
TCGA-BT-A20U-01	LANCL2	BLCA	Yes	No	No	No	No
TCGA-BT-A20U-01	LARP1	BLCA	Yes	No	No	No	No
TCGA-BT-A20U-01	LDB3	BLCA	Yes	No	No	No	No
TCGA-BT-A20U-01	LRRC28	BLCA	Yes	No	No	No	No
TCGA-BT-A20U-01	MACF1	BLCA	Yes	No	No	No	No
TCGA-BT-A20U-01	MACROD2	BLCA	Yes	No	No	No	No
TCGA-BT-A20U-01	MAP3K8	BLCA	Yes	No	No	No	No
TCGA-BT-A20U-01	2022-03-06	BLCA	Yes	No	No	No	No
TCGA-BT-A20U-01	MBD5	BLCA	Yes	No	No	No	No
TCGA-BT-A20U-01	MRPL37	BLCA	Yes	No	No	No	No
TCGA-BT-A20U-01	MTHFD2L	BLCA	Yes	No	No	No	No
TCGA-BT-A20U-01	MVB12A	BLCA	Yes	No	No	No	No
TCGA-BT-A20U-01	NAALADL2	BLCA	Yes	No	No	No	No
TCGA-BT-A20U-01	NDE1	BLCA	Yes	No	No	No	No
TCGA-BT-A20U-01	NFE2L3	BLCA	Yes	No	No	No	No
TCGA-BT-A20U-01	NPEPL1	BLCA	Yes	No	No	No	No
TCGA-BT-A20U-01	NUP85	BLCA	Yes	No	No	No	No
TCGA-BT-A20U-01	OCIAD1	BLCA	Yes	No	No	No	No
TCGA-BT-A20U-01	OXNAD1	BLCA	Yes	No	No	No	No
TCGA-BT-A20U-01	OXR1	BLCA	Yes	No	No	No	No
TCGA-BT-A20U-01	PCGF3	BLCA	Yes	No	No	No	No
TCGA-BT-A20U-01	PDK1	BLCA	Yes	No	No	No	No
TCGA-BT-A20U-01	PEX13	BLCA	Yes	No	No	No	No
TCGA-BT-A20U-01	PFKFB2	BLCA	Yes	No	No	No	No
TCGA-BT-A20U-01	PIP5K1B	BLCA	Yes	No	No	No	No
TCGA-BT-A20U-01	PLCB1	BLCA	Yes	No	No	No	No
TCGA-BT-A20U-01	PRIMPOL	BLCA	Yes	No	No	No	No
TCGA-BT-A20U-01	PRR12	BLCA	Yes	No	No	No	No
TCGA-BT-A20U-01	PRRC1	BLCA	Yes	No	No	No	No
TCGA-BT-A20U-01	PTPN4	BLCA	Yes	No	No	No	No
TCGA-BT-A20U-01	PVR	BLCA	Yes	No	No	No	No
TCGA-BT-A20U-01	RAB3C	BLCA	Yes	No	No	No	No
TCGA-BT-A20U-01	RGS12	BLCA	Yes	No	No	No	Yes
TCGA-BT-A20U-01	RHBDD1	BLCA	Yes	No	No	No	No
TCGA-BT-A20U-01	RNF180	BLCA	Yes	No	No	No	No
TCGA-BT-A20U-01	SCARA3	BLCA	Yes	No	No	No	No
TCGA-BT-A20U-01	SCLY	BLCA	Yes	No	No	No	No
TCGA-BT-A20U-01	SEC22A	BLCA	Yes	No	No	No	Yes
TCGA-BT-A20U-01	SIN3B	BLCA	Yes	No	No	No	No
TCGA-BT-A20U-01	SIRT5	BLCA	Yes	No	No	No	No
TCGA-BT-A20U-01	SLC24A1	BLCA	Yes	No	No	No	No
TCGA-BT-A20U-01	SMAD6	BLCA	Yes	No	No	No	No
TCGA-BT-A20U-01	SMC3	BLCA	Yes	No	No	No	No
TCGA-BT-A20U-01	SMIM8	BLCA	Yes	No	No	No	No
TCGA-BT-A20U-01	SP100	BLCA	Yes	No	No	No	No
TCGA-BT-A20U-01	SPEG	BLCA	Yes	No	No	No	No
TCGA-BT-A20U-01	TAOK1	BLCA	Yes	No	No	No	Yes
TCGA-BT-A20U-01	TF	BLCA	Yes	No	No	No	No
TCGA-BT-A20U-01	TMEM260	BLCA	Yes	No	No	No	No
TCGA-BT-A20U-01	TMEM38B	BLCA	Yes	No	No	No	No
TCGA-BT-A20U-01	TOR1B	BLCA	Yes	No	No	No	No
TCGA-BT-A20U-01	TRIOBP	BLCA	Yes	No	No	No	No
TCGA-BT-A20U-01	TRNT1	BLCA	Yes	No	No	No	No
TCGA-BT-A20U-01	TTC6	BLCA	Yes	No	No	No	No
TCGA-BT-A20U-01	TXLNG	BLCA	Yes	No	No	No	No
TCGA-BT-A20U-01	VPS51	BLCA	Yes	No	No	No	No
TCGA-BT-A20U-01	VTI1A	BLCA	Yes	No	No	No	No
TCGA-BT-A20U-01	WRB-SH3BGR	BLCA	Yes	No	No	No	No
TCGA-BT-A20U-01	ZCCHC2	BLCA	Yes	No	No	No	No
TCGA-BT-A20U-01	ZCCHC4	BLCA	Yes	No	No	No	No
TCGA-BT-A20U-01	ZFP2	BLCA	Yes	No	No	No	No
TCGA-BT-A20U-01	ZNF138	BLCA	Yes	No	No	No	No
TCGA-BT-A20U-01	ZNF264	BLCA	Yes	No	No	No	No
TCGA-BT-A20U-01	ZNF540	BLCA	Yes	No	No	No	No
TCGA-BT-A20U-01	ZNF654	BLCA	Yes	No	No	No	No
TCGA-BT-A20U-01	ZNF678	BLCA	Yes	No	No	No	No
TCGA-BT-A20U-01	ZNF813	BLCA	Yes	No	No	No	No
TCGA-BT-A20U-01	ZSCAN25	BLCA	Yes	No	No	No	No
TCGA-BT-A20W-01	ACAD8	BLCA	Yes	No	No	No	No
TCGA-BT-A20W-01	ACO2	BLCA	Yes	No	No	No	No
TCGA-BT-A20W-01	ACSM3	BLCA	Yes	No	No	No	No
TCGA-BT-A20W-01	ADK	BLCA	Yes	No	No	No	No
TCGA-BT-A20W-01	AGAP3	BLCA	Yes	No	No	No	No
TCGA-BT-A20W-01	AHRR	BLCA	Yes	No	No	No	No
TCGA-BT-A20W-01	AIG1	BLCA	Yes	No	No	No	No
TCGA-BT-A20W-01	ANKRD12	BLCA	Yes	No	No	No	No
TCGA-BT-A20W-01	ANTXR1	BLCA	Yes	No	No	No	No
TCGA-BT-A20W-01	APOPT1	BLCA	Yes	No	No	No	No
TCGA-BT-A20W-01	ARMC8	BLCA	Yes	No	No	No	No
TCGA-BT-A20W-01	ATG10	BLCA	Yes	No	No	No	No
TCGA-BT-A20W-01	ATG7	BLCA	Yes	No	No	No	No
TCGA-BT-A20W-01	BBS1	BLCA	Yes	No	No	No	No
TCGA-BT-A20W-01	BEND6	BLCA	Yes	No	No	No	No
TCGA-BT-A20W-01	BPHL	BLCA	Yes	No	No	No	No
TCGA-BT-A20W-01	C8orf44	BLCA	Yes	No	No	No	No
TCGA-BT-A20W-01	C9orf3	BLCA	Yes	No	No	No	No
TCGA-BT-A20W-01	CASS4	BLCA	Yes	No	No	No	No
TCGA-BT-A20W-01	CCDC18	BLCA	Yes	No	No	No	No
TCGA-BT-A20W-01	CCDC30	BLCA	Yes	No	No	No	No
TCGA-BT-A20W-01	CDC45	BLCA	Yes	No	No	No	No
TCGA-BT-A20W-01	CELF2	BLCA	Yes	No	No	No	No
TCGA-BT-A20W-01	CEP72	BLCA	Yes	No	No	No	No
TCGA-BT-A20W-01	CEP95	BLCA	Yes	No	No	No	No
TCGA-BT-A20W-01	CLCN6	BLCA	Yes	No	No	No	No
TCGA-BT-A20W-01	CLEC16A	BLCA	Yes	No	No	No	No
TCGA-BT-A20W-01	CLIP4	BLCA	Yes	No	No	No	No
TCGA-BT-A20W-01	CNDP2	BLCA	Yes	No	No	No	No
TCGA-BT-A20W-01	CNIH4	BLCA	Yes	No	No	No	No
TCGA-BT-A20W-01	CREM	BLCA	Yes	No	No	No	No
TCGA-BT-A20W-01	CUL4A	BLCA	Yes	No	No	No	No
TCGA-BT-A20W-01	CXADR	BLCA	Yes	No	No	No	No
TCGA-BT-A20W-01	DEPTOR	BLCA	Yes	No	No	No	No
TCGA-BT-A20W-01	DIAPH2	BLCA	Yes	No	No	No	No
TCGA-BT-A20W-01	DISP1	BLCA	Yes	No	No	No	No
TCGA-BT-A20W-01	DNAJB4	BLCA	Yes	No	No	No	No
TCGA-BT-A20W-01	DTNA	BLCA	Yes	No	No	No	No
TCGA-BT-A20W-01	EFCAB2	BLCA	Yes	No	No	No	No
TCGA-BT-A20W-01	EPB41L5	BLCA	Yes	No	No	No	No
TCGA-BT-A20W-01	ERCC4	BLCA	Yes	No	No	Yes	No
TCGA-BT-A20W-01	ERCC6L2	BLCA	Yes	No	No	Yes	No
TCGA-BT-A20W-01	EXOC4	BLCA	Yes	No	No	No	No
TCGA-BT-A20W-01	FAM198A	BLCA	Yes	No	No	No	No
TCGA-BT-A20W-01	FAM20C	BLCA	Yes	No	No	No	No
TCGA-BT-A20W-01	FAM81A	BLCA	Yes	No	No	No	No
TCGA-BT-A20W-01	FARP1	BLCA	Yes	No	No	No	No
TCGA-BT-A20W-01	FBLN1	BLCA	Yes	No	No	No	No
TCGA-BT-A20W-01	GGPS1	BLCA	Yes	No	No	No	No
TCGA-BT-A20W-01	GNAL	BLCA	Yes	No	No	No	No
TCGA-BT-A20W-01	GPATCH2L	BLCA	Yes	No	No	No	No
TCGA-BT-A20W-01	GRAP2	BLCA	Yes	No	No	No	No
TCGA-BT-A20W-01	GRHPR	BLCA	Yes	No	No	No	No
TCGA-BT-A20W-01	GSTM4	BLCA	Yes	No	No	No	No
TCGA-BT-A20W-01	GVQW3	BLCA	Yes	No	No	No	No
TCGA-BT-A20W-01	HADH	BLCA	Yes	No	No	No	No
TCGA-BT-A20W-01	HIP1R	BLCA	Yes	No	No	No	No
TCGA-BT-A20W-01	HNMT	BLCA	Yes	No	No	No	No
TCGA-BT-A20W-01	IGHMBP2	BLCA	Yes	No	No	Yes	No
TCGA-BT-A20W-01	INF2	BLCA	Yes	No	No	No	No
TCGA-BT-A20W-01	ITGB8	BLCA	Yes	No	No	No	No
TCGA-BT-A20W-01	IVD	BLCA	Yes	No	No	No	No
TCGA-BT-A20W-01	JHY	BLCA	Yes	No	No	No	No
TCGA-BT-A20W-01	KCNAB2	BLCA	Yes	No	No	No	No
TCGA-BT-A20W-01	KCNIP3	BLCA	Yes	No	No	No	No
TCGA-BT-A20W-01	KIAA0513	BLCA	Yes	No	No	No	No
TCGA-BT-A20W-01	KIZ	BLCA	Yes	No	No	No	No
TCGA-BT-A20W-01	LDB3	BLCA	Yes	No	No	No	No
TCGA-BT-A20W-01	LEPROT	BLCA	Yes	No	No	No	No
TCGA-BT-A20W-01	LRRC27	BLCA	Yes	No	No	No	No
TCGA-BT-A20W-01	LRRC61	BLCA	Yes	No	No	No	No
TCGA-BT-A20W-01	LRRFIP1	BLCA	Yes	No	No	No	No
TCGA-BT-A20W-01	LYRM1	BLCA	Yes	No	No	No	No
TCGA-BT-A20W-01	MATR3	BLCA	Yes	No	No	No	No
TCGA-BT-A20W-01	MINOS1-NBL1	BLCA	Yes	No	No	No	No
TCGA-BT-A20W-01	MVB12A	BLCA	Yes	No	No	No	No
TCGA-BT-A20W-01	NDE1	BLCA	Yes	No	No	No	No
TCGA-BT-A20W-01	NECAP2	BLCA	Yes	No	No	No	No
TCGA-BT-A20W-01	NEK11	BLCA	Yes	No	No	No	No
TCGA-BT-A20W-01	NIPAL3	BLCA	Yes	No	No	No	No
TCGA-BT-A20W-01	NLRC5	BLCA	Yes	No	No	No	No
TCGA-BT-A20W-01	NNT	BLCA	Yes	No	No	No	No
TCGA-BT-A20W-01	NOP56	BLCA	Yes	No	No	No	No
TCGA-BT-A20W-01	OCIAD1	BLCA	Yes	No	No	No	No
TCGA-BT-A20W-01	OPTN	BLCA	Yes	No	No	No	No
TCGA-BT-A20W-01	PAIP2	BLCA	Yes	No	No	No	No
TCGA-BT-A20W-01	PCDH11X	BLCA	Yes	No	No	No	No
TCGA-BT-A20W-01	PCDH11Y	BLCA	Yes	No	No	No	No
TCGA-BT-A20W-01	PCGF5	BLCA	Yes	No	No	No	No
TCGA-BT-A20W-01	PCM1	BLCA	Yes	No	No	No	No
TCGA-BT-A20W-01	PCTP	BLCA	Yes	No	No	No	No
TCGA-BT-A20W-01	PDCD11	BLCA	Yes	No	No	No	No
TCGA-BT-A20W-01	PDE3A	BLCA	Yes	No	No	No	No
TCGA-BT-A20W-01	PDXK	BLCA	Yes	No	No	No	No
TCGA-BT-A20W-01	PHF20L1	BLCA	Yes	No	No	No	No
TCGA-BT-A20W-01	PIP5K1B	BLCA	Yes	No	No	No	No
TCGA-BT-A20W-01	POLR1D	BLCA	Yes	No	No	No	No
TCGA-BT-A20W-01	PPARA	BLCA	Yes	No	No	No	No
TCGA-BT-A20W-01	PPFIA1	BLCA	Yes	No	No	No	No
TCGA-BT-A20W-01	PPP1R3F	BLCA	Yes	No	No	No	No
TCGA-BT-A20W-01	PPP2R5C	BLCA	Yes	No	No	No	No
TCGA-BT-A20W-01	PRKCE	BLCA	Yes	No	No	No	No
TCGA-BT-A20W-01	RABEP1	BLCA	Yes	No	No	No	No
TCGA-BT-A20W-01	RABGEF1	BLCA	Yes	No	No	No	No
TCGA-BT-A20W-01	RAD51B	BLCA	Yes	No	No	Yes	No
TCGA-BT-A20W-01	RALGPS1	BLCA	Yes	No	No	No	No
TCGA-BT-A20W-01	RCOR3	BLCA	Yes	No	No	No	No
TCGA-BT-A20W-01	RECK	BLCA	Yes	No	No	No	No
TCGA-BT-A20W-01	REEP3	BLCA	Yes	No	No	No	No
TCGA-BT-A20W-01	RGS12	BLCA	Yes	No	No	No	Yes
TCGA-BT-A20W-01	RHBDD1	BLCA	Yes	No	No	No	No
TCGA-BT-A20W-01	RNASE4	BLCA	Yes	No	No	No	No
TCGA-BT-A20W-01	RNF180	BLCA	Yes	No	No	No	No
TCGA-BT-A20W-01	RNF214	BLCA	Yes	No	No	No	No
TCGA-BT-A20W-01	RPP30	BLCA	Yes	No	No	No	No
TCGA-BT-A20W-01	SDCCAG8	BLCA	Yes	No	No	No	No
TCGA-BT-A20W-01	SEC14L1	BLCA	Yes	No	No	No	No
TCGA-BT-A20W-01	SEC22A	BLCA	Yes	No	No	No	Yes
TCGA-BT-A20W-01	SIN3B	BLCA	Yes	No	No	No	No
TCGA-BT-A20W-01	SLC30A9	BLCA	Yes	No	No	Yes	No
TCGA-BT-A20W-01	SLC35F1	BLCA	Yes	No	No	No	No
TCGA-BT-A20W-01	SLF2	BLCA	Yes	No	No	No	No
TCGA-BT-A20W-01	SMAD6	BLCA	Yes	No	No	No	No
TCGA-BT-A20W-01	SMIM8	BLCA	Yes	No	No	No	No
TCGA-BT-A20W-01	SP100	BLCA	Yes	No	No	No	No
TCGA-BT-A20W-01	SPEG	BLCA	Yes	No	No	No	No
TCGA-BT-A20W-01	TANC1	BLCA	Yes	No	No	No	No
TCGA-BT-A20W-01	TANK	BLCA	Yes	No	No	No	No
TCGA-BT-A20W-01	TBC1D8B	BLCA	Yes	No	No	No	No
TCGA-BT-A20W-01	TBCE	BLCA	Yes	No	No	No	No
TCGA-BT-A20W-01	TGFB1I1	BLCA	Yes	No	No	No	No
TCGA-BT-A20W-01	THNSL2	BLCA	Yes	No	No	No	No
TCGA-BT-A20W-01	TMCO3	BLCA	Yes	No	No	No	No
TCGA-BT-A20W-01	TRAPPC12	BLCA	Yes	No	No	No	No
TCGA-BT-A20W-01	TTC12	BLCA	Yes	No	No	No	No
TCGA-BT-A20W-01	URI1	BLCA	Yes	No	No	No	No
TCGA-BT-A20W-01	VWA5A	BLCA	Yes	No	No	No	No
TCGA-BT-A20W-01	XYLB	BLCA	Yes	No	No	No	No
TCGA-BT-A20W-01	ZCWPW2	BLCA	Yes	No	No	No	No
TCGA-BT-A20W-01	ZFP2	BLCA	Yes	No	No	No	No
TCGA-BT-A20W-01	ZNF174	BLCA	Yes	No	No	No	No
TCGA-BT-A20W-01	ZNF331	BLCA	Yes	No	No	No	No
TCGA-BT-A20W-01	ZNF431	BLCA	Yes	No	No	No	No
TCGA-BT-A20W-01	ZNF540	BLCA	Yes	No	No	No	No
TCGA-BT-A20W-01	ZNF718	BLCA	Yes	No	No	No	No
TCGA-BT-A20W-01	ZNF720	BLCA	Yes	No	No	No	No
TCGA-BT-A2LA-01	ABCD1	BLCA	Yes	No	No	No	No
TCGA-BT-A2LA-01	ABCD3	BLCA	Yes	No	No	No	No
TCGA-BT-A2LA-01	ADAMTSL4	BLCA	Yes	No	No	No	No
TCGA-BT-A2LA-01	ADGRL2	BLCA	Yes	No	No	No	No
TCGA-BT-A2LA-01	ADK	BLCA	Yes	No	No	No	No
TCGA-BT-A2LA-01	AGO3	BLCA	Yes	No	No	No	No
TCGA-BT-A2LA-01	AHRR	BLCA	Yes	No	No	No	No
TCGA-BT-A2LA-01	AIG1	BLCA	Yes	No	No	No	No
TCGA-BT-A2LA-01	AK7	BLCA	Yes	No	No	No	No
TCGA-BT-A2LA-01	AKR1E2	BLCA	Yes	No	No	No	No
TCGA-BT-A2LA-01	ALPK1	BLCA	Yes	No	No	No	No
TCGA-BT-A2LA-01	AMY2B	BLCA	Yes	No	No	No	No
TCGA-BT-A2LA-01	ANKDD1A	BLCA	Yes	No	No	No	No
TCGA-BT-A2LA-01	ANKRD12	BLCA	Yes	No	No	No	No
TCGA-BT-A2LA-01	ANKRD18B	BLCA	Yes	No	No	No	No
TCGA-BT-A2LA-01	ANKRD42	BLCA	Yes	No	No	No	No
TCGA-BT-A2LA-01	AP4E1	BLCA	Yes	No	No	No	No
TCGA-BT-A2LA-01	APLF	BLCA	Yes	No	No	Yes	No
TCGA-BT-A2LA-01	ARMC2	BLCA	Yes	No	No	No	No
TCGA-BT-A2LA-01	ARMC8	BLCA	Yes	No	No	No	No
TCGA-BT-A2LA-01	ARMCX4	BLCA	Yes	No	No	No	No
TCGA-BT-A2LA-01	ARMCX5-GPRASP2	BLCA	Yes	No	No	No	No
TCGA-BT-A2LA-01	ATAD5	BLCA	Yes	No	No	No	No
TCGA-BT-A2LA-01	ATF7IP2	BLCA	Yes	No	No	No	No
TCGA-BT-A2LA-01	B4GALNT3	BLCA	Yes	No	No	No	No
TCGA-BT-A2LA-01	BBS1	BLCA	Yes	No	No	No	No
TCGA-BT-A2LA-01	BCAP29	BLCA	Yes	No	No	No	No
TCGA-BT-A2LA-01	BCCIP	BLCA	Yes	No	No	No	No
TCGA-BT-A2LA-01	BIVM-ERCC5	BLCA	Yes	No	No	No	No
TCGA-BT-A2LA-01	BMP1	BLCA	Yes	No	No	No	No
TCGA-BT-A2LA-01	BMX	BLCA	Yes	No	No	No	No
TCGA-BT-A2LA-01	BPTF	BLCA	Yes	No	No	No	No
TCGA-BT-A2LA-01	BROX	BLCA	Yes	No	No	No	No
TCGA-BT-A2LA-01	BUB1B-PAK6	BLCA	Yes	No	No	No	No
TCGA-BT-A2LA-01	C11orf70	BLCA	Yes	No	No	No	No
TCGA-BT-A2LA-01	C2orf27A	BLCA	Yes	No	No	No	No
TCGA-BT-A2LA-01	C5orf24	BLCA	Yes	No	No	No	No
TCGA-BT-A2LA-01	C6orf203	BLCA	Yes	No	No	No	No
TCGA-BT-A2LA-01	CC2D2A	BLCA	Yes	No	No	No	No
TCGA-BT-A2LA-01	CCDC138	BLCA	Yes	No	No	No	No
TCGA-BT-A2LA-01	CCDC157	BLCA	Yes	No	No	No	No
TCGA-BT-A2LA-01	CCDC18	BLCA	Yes	No	No	No	No
TCGA-BT-A2LA-01	CCDC30	BLCA	Yes	No	No	No	No
TCGA-BT-A2LA-01	CD96	BLCA	Yes	No	No	No	No
TCGA-BT-A2LA-01	CDC45	BLCA	Yes	No	No	No	No
TCGA-BT-A2LA-01	CDH23	BLCA	Yes	No	No	No	No
TCGA-BT-A2LA-01	CEP135	BLCA	Yes	No	No	No	No
TCGA-BT-A2LA-01	CEP95	BLCA	Yes	No	No	No	No
TCGA-BT-A2LA-01	CFLAR	BLCA	Yes	No	No	No	No
TCGA-BT-A2LA-01	CHEK1	BLCA	Yes	No	No	Yes	No
TCGA-BT-A2LA-01	COQ4	BLCA	Yes	No	No	No	No
TCGA-BT-A2LA-01	CPED1	BLCA	Yes	No	No	No	No
TCGA-BT-A2LA-01	CREM	BLCA	Yes	No	No	No	No
TCGA-BT-A2LA-01	CROT	BLCA	Yes	No	No	No	No
TCGA-BT-A2LA-01	CUL4A	BLCA	Yes	No	No	No	No
TCGA-BT-A2LA-01	CUL9	BLCA	Yes	No	No	No	No
TCGA-BT-A2LA-01	CYB5R4	BLCA	Yes	No	No	No	No
TCGA-BT-A2LA-01	CYFIP2	BLCA	Yes	No	No	No	No
TCGA-BT-A2LA-01	DBF4B	BLCA	Yes	No	No	No	No
TCGA-BT-A2LA-01	DDX49	BLCA	Yes	No	No	No	No
TCGA-BT-A2LA-01	DGKE	BLCA	Yes	No	No	No	No
TCGA-BT-A2LA-01	DGLUCY	BLCA	Yes	No	No	No	No
TCGA-BT-A2LA-01	DHX30	BLCA	Yes	No	No	No	No
TCGA-BT-A2LA-01	DIAPH2	BLCA	Yes	No	No	No	No
TCGA-BT-A2LA-01	DMXL1	BLCA	Yes	No	No	No	No
TCGA-BT-A2LA-01	DNAJB4	BLCA	Yes	No	No	No	No
TCGA-BT-A2LA-01	DNHD1	BLCA	Yes	No	No	No	No
TCGA-BT-A2LA-01	DPY19L4	BLCA	Yes	No	No	No	Yes
TCGA-BT-A2LA-01	DTNA	BLCA	Yes	No	No	No	No
TCGA-BT-A2LA-01	DTWD1	BLCA	Yes	No	No	No	No
TCGA-BT-A2LA-01	ELAC1	BLCA	Yes	No	No	No	No
TCGA-BT-A2LA-01	ENDOV	BLCA	Yes	No	No	Yes	No
TCGA-BT-A2LA-01	FAHD2A	BLCA	Yes	No	No	No	No
TCGA-BT-A2LA-01	FAM185A	BLCA	Yes	No	No	No	No
TCGA-BT-A2LA-01	FAM20C	BLCA	Yes	No	No	No	No
TCGA-BT-A2LA-01	FAM47E-STBD1	BLCA	Yes	No	No	No	No
TCGA-BT-A2LA-01	FAN1	BLCA	Yes	No	No	Yes	No
TCGA-BT-A2LA-01	FANCI	BLCA	Yes	No	No	Yes	No
TCGA-BT-A2LA-01	FLAD1	BLCA	Yes	No	No	No	No
TCGA-BT-A2LA-01	FXR1	BLCA	Yes	No	No	No	No
TCGA-BT-A2LA-01	GGPS1	BLCA	Yes	No	No	No	No
TCGA-BT-A2LA-01	GPC6	BLCA	Yes	Yes	Yes	No	No
TCGA-BT-A2LA-01	GPR146	BLCA	Yes	No	No	No	No
TCGA-BT-A2LA-01	GRAP2	BLCA	Yes	No	No	No	No
TCGA-BT-A2LA-01	GTF2H1	BLCA	Yes	No	No	Yes	No
TCGA-BT-A2LA-01	GVQW3	BLCA	Yes	No	No	No	No
TCGA-BT-A2LA-01	HECTD2	BLCA	Yes	No	No	No	No
TCGA-BT-A2LA-01	HEXB	BLCA	Yes	No	No	No	No
TCGA-BT-A2LA-01	ILF3	BLCA	Yes	No	No	No	No
TCGA-BT-A2LA-01	INF2	BLCA	Yes	No	No	No	No
TCGA-BT-A2LA-01	ING3	BLCA	Yes	No	No	No	No
TCGA-BT-A2LA-01	ITGB8	BLCA	Yes	No	No	No	No
TCGA-BT-A2LA-01	KAZALD1	BLCA	Yes	No	No	No	No
TCGA-BT-A2LA-01	KCTD3	BLCA	Yes	No	No	No	No
TCGA-BT-A2LA-01	KIAA0232	BLCA	Yes	No	No	No	No
TCGA-BT-A2LA-01	KIAA0513	BLCA	Yes	No	No	No	No
TCGA-BT-A2LA-01	KIAA0586	BLCA	Yes	No	No	No	No
TCGA-BT-A2LA-01	KIZ	BLCA	Yes	No	No	No	No
TCGA-BT-A2LA-01	KLC1	BLCA	Yes	No	No	No	No
TCGA-BT-A2LA-01	KLF3	BLCA	Yes	No	No	No	No
TCGA-BT-A2LA-01	KLHL18	BLCA	Yes	No	No	No	No
TCGA-BT-A2LA-01	KLHL24	BLCA	Yes	No	No	No	No
TCGA-BT-A2LA-01	KPNA5	BLCA	Yes	No	No	No	No
TCGA-BT-A2LA-01	L3MBTL1	BLCA	Yes	No	No	No	No
TCGA-BT-A2LA-01	LACTB	BLCA	Yes	No	No	No	No
TCGA-BT-A2LA-01	LAMA3	BLCA	Yes	No	No	No	No
TCGA-BT-A2LA-01	LARP1	BLCA	Yes	No	No	No	No
TCGA-BT-A2LA-01	LARP1B	BLCA	Yes	No	No	No	No
TCGA-BT-A2LA-01	LDB3	BLCA	Yes	No	No	No	No
TCGA-BT-A2LA-01	LIAS	BLCA	Yes	No	No	No	No
TCGA-BT-A2LA-01	LIMK2	BLCA	Yes	No	No	No	No
TCGA-BT-A2LA-01	LOC101927572	BLCA	Yes	No	No	No	No
TCGA-BT-A2LA-01	LRRC1	BLCA	Yes	No	No	No	No
TCGA-BT-A2LA-01	LRRC27	BLCA	Yes	No	No	No	No
TCGA-BT-A2LA-01	LRRC28	BLCA	Yes	No	No	No	No
TCGA-BT-A2LA-01	LRRC61	BLCA	Yes	No	No	No	No
TCGA-BT-A2LA-01	MACF1	BLCA	Yes	No	No	No	No
TCGA-BT-A2LA-01	MACROD2	BLCA	Yes	No	No	No	No
TCGA-BT-A2LA-01	MARVELD3	BLCA	Yes	No	No	No	No
TCGA-BT-A2LA-01	MBD5	BLCA	Yes	No	No	No	No
TCGA-BT-A2LA-01	MCPH1	BLCA	Yes	No	No	No	No
TCGA-BT-A2LA-01	MEGF8	BLCA	Yes	No	No	No	No
TCGA-BT-A2LA-01	METTL2B	BLCA	Yes	No	No	No	No
TCGA-BT-A2LA-01	MINDY4	BLCA	Yes	No	No	No	No
TCGA-BT-A2LA-01	MINOS1-NBL1	BLCA	Yes	No	No	No	No
TCGA-BT-A2LA-01	MIPOL1	BLCA	Yes	No	No	No	No
TCGA-BT-A2LA-01	MLXIP	BLCA	Yes	No	No	No	No
TCGA-BT-A2LA-01	MPI	BLCA	Yes	No	No	No	No
TCGA-BT-A2LA-01	MRM3	BLCA	Yes	No	No	No	No
TCGA-BT-A2LA-01	MROH1	BLCA	Yes	No	No	No	No
TCGA-BT-A2LA-01	MRPS6	BLCA	Yes	No	No	No	No
TCGA-BT-A2LA-01	MSTO1	BLCA	Yes	No	No	No	No
TCGA-BT-A2LA-01	MTHFD1L	BLCA	Yes	No	No	No	No
TCGA-BT-A2LA-01	MVP	BLCA	Yes	No	No	No	No
TCGA-BT-A2LA-01	NADSYN1	BLCA	Yes	No	No	No	No
TCGA-BT-A2LA-01	NDE1	BLCA	Yes	No	No	No	No
TCGA-BT-A2LA-01	NDUFAF6	BLCA	Yes	No	No	No	No
TCGA-BT-A2LA-01	NECAP2	BLCA	Yes	No	No	No	No
TCGA-BT-A2LA-01	NECTIN3	BLCA	Yes	No	No	No	No
TCGA-BT-A2LA-01	NFE2L3	BLCA	Yes	No	No	No	No
TCGA-BT-A2LA-01	NHLRC3	BLCA	Yes	No	No	No	No
TCGA-BT-A2LA-01	NIF3L1	BLCA	Yes	No	No	No	No
TCGA-BT-A2LA-01	NME1-NME2	BLCA	Yes	No	No	No	No
TCGA-BT-A2LA-01	NNT	BLCA	Yes	No	No	No	No
TCGA-BT-A2LA-01	NPEPL1	BLCA	Yes	No	No	No	No
TCGA-BT-A2LA-01	NRG1	BLCA	Yes	No	No	No	No
TCGA-BT-A2LA-01	NSD2	BLCA	Yes	No	No	No	No
TCGA-BT-A2LA-01	NSUN7	BLCA	Yes	No	No	No	No
TCGA-BT-A2LA-01	NTNG1	BLCA	Yes	No	No	No	No
TCGA-BT-A2LA-01	NUB1	BLCA	Yes	No	No	No	No
TCGA-BT-A2LA-01	NUDT15	BLCA	Yes	No	No	No	No
TCGA-BT-A2LA-01	OAS2	BLCA	Yes	No	No	No	No
TCGA-BT-A2LA-01	OCIAD1	BLCA	Yes	No	No	No	No
TCGA-BT-A2LA-01	ORC3	BLCA	Yes	No	No	No	No
TCGA-BT-A2LA-01	OSBPL2	BLCA	Yes	No	No	No	No
TCGA-BT-A2LA-01	OXR1	BLCA	Yes	No	No	No	No
TCGA-BT-A2LA-01	PACRGL	BLCA	Yes	No	No	No	No
TCGA-BT-A2LA-01	PAK3	BLCA	Yes	No	No	No	No
TCGA-BT-A2LA-01	PATJ	BLCA	Yes	No	No	No	No
TCGA-BT-A2LA-01	PCDH7	BLCA	Yes	No	No	No	Yes
TCGA-BT-A2LA-01	PCNX1	BLCA	Yes	No	No	No	No
TCGA-BT-A2LA-01	PCNX4	BLCA	Yes	No	No	No	No
TCGA-BT-A2LA-01	PDXK	BLCA	Yes	No	No	No	No
TCGA-BT-A2LA-01	PEX13	BLCA	Yes	No	No	No	No
TCGA-BT-A2LA-01	PFKFB2	BLCA	Yes	No	No	No	No
TCGA-BT-A2LA-01	PHF20L1	BLCA	Yes	No	No	No	No
TCGA-BT-A2LA-01	PHTF2	BLCA	Yes	No	No	No	No
TCGA-BT-A2LA-01	PIBF1	BLCA	Yes	No	No	No	No
TCGA-BT-A2LA-01	PIGX	BLCA	Yes	No	No	No	No
TCGA-BT-A2LA-01	PJVK	BLCA	Yes	No	No	No	No
TCGA-BT-A2LA-01	PLCB1	BLCA	Yes	No	No	No	No
TCGA-BT-A2LA-01	PNKD	BLCA	Yes	No	No	No	No
TCGA-BT-A2LA-01	POLI	BLCA	Yes	No	No	Yes	No
TCGA-BT-A2LA-01	PPARA	BLCA	Yes	No	No	No	No
TCGA-BT-A2LA-01	PPFIA1	BLCA	Yes	No	No	No	No
TCGA-BT-A2LA-01	PQLC2L	BLCA	Yes	No	No	No	No
TCGA-BT-A2LA-01	PRKAR1A	BLCA	Yes	No	No	No	No
TCGA-BT-A2LA-01	PRR12	BLCA	Yes	No	No	No	No
TCGA-BT-A2LA-01	PRRC1	BLCA	Yes	No	No	No	No
TCGA-BT-A2LA-01	PTPRJ	BLCA	Yes	No	No	No	No
TCGA-BT-A2LA-01	PVR	BLCA	Yes	No	No	No	No
TCGA-BT-A2LA-01	RAB32	BLCA	Yes	No	No	No	No
TCGA-BT-A2LA-01	RABGAP1L	BLCA	Yes	No	No	No	No
TCGA-BT-A2LA-01	RABGEF1	BLCA	Yes	No	No	No	No
TCGA-BT-A2LA-01	RBM33	BLCA	Yes	No	No	No	No
TCGA-BT-A2LA-01	RBM45	BLCA	Yes	No	No	No	No
TCGA-BT-A2LA-01	RECK	BLCA	Yes	No	No	No	No
TCGA-BT-A2LA-01	REEP3	BLCA	Yes	No	No	No	No
TCGA-BT-A2LA-01	RFC3	BLCA	Yes	No	No	Yes	No
TCGA-BT-A2LA-01	RNASE4	BLCA	Yes	No	No	No	No
TCGA-BT-A2LA-01	RNF165	BLCA	Yes	No	No	No	No
TCGA-BT-A2LA-01	RNF180	BLCA	Yes	No	No	No	No
TCGA-BT-A2LA-01	RRNAD1	BLCA	Yes	No	No	No	No
TCGA-BT-A2LA-01	SARS	BLCA	Yes	No	No	No	No
TCGA-BT-A2LA-01	SEC14L1	BLCA	Yes	No	No	No	No
TCGA-BT-A2LA-01	SETMAR	BLCA	Yes	No	No	No	No
TCGA-BT-A2LA-01	SIN3B	BLCA	Yes	No	No	No	No
TCGA-BT-A2LA-01	SIRT5	BLCA	Yes	No	No	No	No
TCGA-BT-A2LA-01	SLC44A1	BLCA	Yes	No	No	No	No
TCGA-BT-A2LA-01	SLF2	BLCA	Yes	No	No	No	No
TCGA-BT-A2LA-01	SMAD6	BLCA	Yes	No	No	No	No
TCGA-BT-A2LA-01	SMC3	BLCA	Yes	No	No	No	No
TCGA-BT-A2LA-01	SNTG1	BLCA	Yes	No	No	No	No
TCGA-BT-A2LA-01	SP100	BLCA	Yes	No	No	No	No
TCGA-BT-A2LA-01	SPATA33	BLCA	Yes	No	No	No	No
TCGA-BT-A2LA-01	SPG7	BLCA	Yes	No	No	No	No
TCGA-BT-A2LA-01	STON1	BLCA	Yes	No	No	No	No
TCGA-BT-A2LA-01	STXBP1	BLCA	Yes	No	No	No	No
TCGA-BT-A2LA-01	SYNPO2	BLCA	Yes	No	No	No	No
TCGA-BT-A2LA-01	TAF1B	BLCA	Yes	No	No	No	No
TCGA-BT-A2LA-01	TANC1	BLCA	Yes	No	No	No	No
TCGA-BT-A2LA-01	TANK	BLCA	Yes	No	No	No	No
TCGA-BT-A2LA-01	TBC1D17	BLCA	Yes	No	No	No	No
TCGA-BT-A2LA-01	TBC1D8B	BLCA	Yes	No	No	No	No
TCGA-BT-A2LA-01	TDP1	BLCA	Yes	No	No	Yes	No
TCGA-BT-A2LA-01	TEX22	BLCA	Yes	No	No	No	No
TCGA-BT-A2LA-01	TGFB1I1	BLCA	Yes	No	No	No	No
TCGA-BT-A2LA-01	TMCO3	BLCA	Yes	No	No	No	No
TCGA-BT-A2LA-01	TMEM260	BLCA	Yes	No	No	No	No
TCGA-BT-A2LA-01	TMEM38B	BLCA	Yes	No	No	No	No
TCGA-BT-A2LA-01	TMEM91	BLCA	Yes	No	No	No	No
TCGA-BT-A2LA-01	TOR1B	BLCA	Yes	No	No	No	No
TCGA-BT-A2LA-01	TRAPPC12	BLCA	Yes	No	No	No	No
TCGA-BT-A2LA-01	TRAPPC13	BLCA	Yes	No	No	No	No
TCGA-BT-A2LA-01	TRHDE	BLCA	Yes	No	No	No	No
TCGA-BT-A2LA-01	TRIOBP	BLCA	Yes	No	No	No	No
TCGA-BT-A2LA-01	TRMU	BLCA	Yes	No	No	No	No
TCGA-BT-A2LA-01	TSEN2	BLCA	Yes	No	No	No	No
TCGA-BT-A2LA-01	TXLNG	BLCA	Yes	No	No	No	No
TCGA-BT-A2LA-01	UBE3B	BLCA	Yes	No	No	No	No
TCGA-BT-A2LA-01	VMP1	BLCA	Yes	No	No	No	No
TCGA-BT-A2LA-01	VPS8	BLCA	Yes	No	No	No	No
TCGA-BT-A2LA-01	VTI1A	BLCA	Yes	No	No	No	No
TCGA-BT-A2LA-01	VWA5A	BLCA	Yes	No	No	No	No
TCGA-BT-A2LA-01	WBP2NL	BLCA	Yes	No	No	No	No
TCGA-BT-A2LA-01	WDR19	BLCA	Yes	No	No	No	No
TCGA-BT-A2LA-01	WDR7	BLCA	Yes	No	No	No	No
TCGA-BT-A2LA-01	WRB-SH3BGR	BLCA	Yes	No	No	No	No
TCGA-BT-A2LA-01	XPNPEP3	BLCA	Yes	No	No	No	No
TCGA-BT-A2LA-01	XYLB	BLCA	Yes	No	No	No	No
TCGA-BT-A2LA-01	YLPM1	BLCA	Yes	No	No	No	Yes
TCGA-BT-A2LA-01	ZCWPW2	BLCA	Yes	No	No	No	No
TCGA-BT-A2LA-01	ZFYVE16	BLCA	Yes	No	No	No	No
TCGA-BT-A2LA-01	ZNF264	BLCA	Yes	No	No	No	No
TCGA-BT-A2LA-01	ZNF331	BLCA	Yes	No	No	No	No
TCGA-BT-A2LA-01	ZNF333	BLCA	Yes	No	No	No	No
TCGA-BT-A2LA-01	ZNF33A	BLCA	Yes	No	No	No	No
TCGA-BT-A2LA-01	ZNF346	BLCA	Yes	No	No	No	No
TCGA-BT-A2LA-01	ZNF451	BLCA	Yes	No	No	No	No
TCGA-BT-A2LA-01	ZNF454	BLCA	Yes	No	No	No	No
TCGA-BT-A2LA-01	ZNF493	BLCA	Yes	No	No	No	No
TCGA-BT-A2LA-01	ZNF540	BLCA	Yes	No	No	No	No
TCGA-BT-A2LA-01	ZNF544	BLCA	Yes	No	No	No	No
TCGA-BT-A2LA-01	ZNF568	BLCA	Yes	No	No	No	No
TCGA-BT-A2LA-01	ZNF654	BLCA	Yes	No	No	No	No
TCGA-BT-A2LA-01	ZNF678	BLCA	Yes	No	No	No	No
TCGA-BT-A2LA-01	ZNF718	BLCA	Yes	No	No	No	No
TCGA-BT-A2LA-01	ZSCAN25	BLCA	Yes	No	No	No	No
TCGA-BT-A2LB-01	ABCD3	BLCA	Yes	No	No	No	No
TCGA-BT-A2LB-01	ABL1	BLCA	Yes	No	No	Yes	No
TCGA-BT-A2LB-01	ACSM3	BLCA	Yes	No	No	No	No
TCGA-BT-A2LB-01	ACYP2	BLCA	Yes	No	No	No	No
TCGA-BT-A2LB-01	ADGRL3	BLCA	Yes	No	No	No	No
TCGA-BT-A2LB-01	ADK	BLCA	Yes	No	No	No	No
TCGA-BT-A2LB-01	AGAP3	BLCA	Yes	No	No	No	No
TCGA-BT-A2LB-01	AHRR	BLCA	Yes	No	No	No	No
TCGA-BT-A2LB-01	AIG1	BLCA	Yes	No	No	No	No
TCGA-BT-A2LB-01	AMY2B	BLCA	Yes	Yes	Yes	No	No
TCGA-BT-A2LB-01	ANKEF1	BLCA	Yes	No	No	No	No
TCGA-BT-A2LB-01	ANKRD12	BLCA	Yes	No	No	No	No
TCGA-BT-A2LB-01	ANKRD18B	BLCA	Yes	No	No	No	No
TCGA-BT-A2LB-01	ANTXR1	BLCA	Yes	No	No	No	No
TCGA-BT-A2LB-01	ARMC2	BLCA	Yes	No	No	No	No
TCGA-BT-A2LB-01	ARMCX5-GPRASP2	BLCA	Yes	No	No	No	No
TCGA-BT-A2LB-01	ATP1A4	BLCA	Yes	No	No	No	No
TCGA-BT-A2LB-01	BBS1	BLCA	Yes	No	No	No	No
TCGA-BT-A2LB-01	BCCIP	BLCA	Yes	No	No	No	No
TCGA-BT-A2LB-01	BMP1	BLCA	Yes	No	No	No	No
TCGA-BT-A2LB-01	BMX	BLCA	Yes	No	No	No	No
TCGA-BT-A2LB-01	BUB1B-PAK6	BLCA	Yes	No	No	No	No
TCGA-BT-A2LB-01	C11orf49	BLCA	Yes	No	No	No	No
TCGA-BT-A2LB-01	C11orf70	BLCA	Yes	No	No	No	No
TCGA-BT-A2LB-01	C9orf3	BLCA	Yes	No	No	No	No
TCGA-BT-A2LB-01	CC2D2A	BLCA	Yes	No	No	No	No
TCGA-BT-A2LB-01	CCDC138	BLCA	Yes	No	No	No	No
TCGA-BT-A2LB-01	CCDC171	BLCA	Yes	No	No	No	No
TCGA-BT-A2LB-01	CCDC30	BLCA	Yes	No	No	No	No
TCGA-BT-A2LB-01	CCSER1	BLCA	Yes	No	No	No	No
TCGA-BT-A2LB-01	CD96	BLCA	Yes	No	No	No	No
TCGA-BT-A2LB-01	CDADC1	BLCA	Yes	No	No	No	No
TCGA-BT-A2LB-01	CDC45	BLCA	Yes	No	No	No	No
TCGA-BT-A2LB-01	CDH23	BLCA	Yes	No	No	No	No
TCGA-BT-A2LB-01	CEBPZOS	BLCA	Yes	No	No	No	No
TCGA-BT-A2LB-01	CEP135	BLCA	Yes	No	No	No	No
TCGA-BT-A2LB-01	CEP68	BLCA	Yes	No	No	No	No
TCGA-BT-A2LB-01	CEP78	BLCA	Yes	No	No	No	No
TCGA-BT-A2LB-01	CLCN4	BLCA	Yes	No	No	No	No
TCGA-BT-A2LB-01	CLYBL	BLCA	Yes	No	No	No	No
TCGA-BT-A2LB-01	CNIH4	BLCA	Yes	No	No	No	No
TCGA-BT-A2LB-01	CNKSR2	BLCA	Yes	No	No	No	No
TCGA-BT-A2LB-01	CNPY3-GNMT	BLCA	Yes	No	No	No	No
TCGA-BT-A2LB-01	COL14A1	BLCA	Yes	No	No	No	No
TCGA-BT-A2LB-01	COQ4	BLCA	Yes	No	No	No	No
TCGA-BT-A2LB-01	CORO2B	BLCA	Yes	No	No	No	No
TCGA-BT-A2LB-01	CREB5	BLCA	Yes	No	No	No	No
TCGA-BT-A2LB-01	CRELD1	BLCA	Yes	No	No	No	No
TCGA-BT-A2LB-01	CREM	BLCA	Yes	No	No	No	No
TCGA-BT-A2LB-01	CUL9	BLCA	Yes	No	No	No	No
TCGA-BT-A2LB-01	CXADR	BLCA	Yes	No	No	No	No
TCGA-BT-A2LB-01	CYB5R4	BLCA	Yes	No	No	No	No
TCGA-BT-A2LB-01	DCBLD1	BLCA	Yes	No	No	No	No
TCGA-BT-A2LB-01	DCP2	BLCA	Yes	No	No	No	No
TCGA-BT-A2LB-01	DISP1	BLCA	Yes	No	No	No	No
TCGA-BT-A2LB-01	DMXL1	BLCA	Yes	No	No	No	No
TCGA-BT-A2LB-01	DNAH10	BLCA	Yes	No	No	No	No
TCGA-BT-A2LB-01	DNHD1	BLCA	Yes	No	No	No	No
TCGA-BT-A2LB-01	EFCAB2	BLCA	Yes	No	No	No	No
TCGA-BT-A2LB-01	ELAC1	BLCA	Yes	No	No	No	No
TCGA-BT-A2LB-01	ENDOV	BLCA	Yes	No	No	Yes	No
TCGA-BT-A2LB-01	EPB41L5	BLCA	Yes	No	No	No	No
TCGA-BT-A2LB-01	ERCC4	BLCA	Yes	No	No	Yes	No
TCGA-BT-A2LB-01	FAM149A	BLCA	Yes	No	No	No	No
TCGA-BT-A2LB-01	FAM185A	BLCA	Yes	No	No	No	No
TCGA-BT-A2LB-01	FAM234A	BLCA	Yes	No	No	No	No
TCGA-BT-A2LB-01	FAN1	BLCA	Yes	No	No	Yes	No
TCGA-BT-A2LB-01	FBLN1	BLCA	Yes	No	No	No	No
TCGA-BT-A2LB-01	FBXO36	BLCA	Yes	No	No	No	No
TCGA-BT-A2LB-01	FLJ44635	BLCA	Yes	No	No	No	No
TCGA-BT-A2LB-01	FMR1	BLCA	Yes	No	No	No	No
TCGA-BT-A2LB-01	GARNL3	BLCA	Yes	No	No	No	No
TCGA-BT-A2LB-01	GGPS1	BLCA	Yes	No	No	No	No
TCGA-BT-A2LB-01	GLDN	BLCA	Yes	No	No	No	No
TCGA-BT-A2LB-01	GLIPR1L2	BLCA	Yes	No	No	No	No
TCGA-BT-A2LB-01	GOSR2	BLCA	Yes	No	No	No	No
TCGA-BT-A2LB-01	GPSM2	BLCA	Yes	No	No	No	No
TCGA-BT-A2LB-01	GRHPR	BLCA	Yes	No	No	No	No
TCGA-BT-A2LB-01	HADH	BLCA	Yes	No	No	No	No
TCGA-BT-A2LB-01	HEXB	BLCA	Yes	No	No	No	No
TCGA-BT-A2LB-01	HNRNPA3	BLCA	Yes	No	No	No	No
TCGA-BT-A2LB-01	HSPE1-MOB4	BLCA	Yes	No	No	No	No
TCGA-BT-A2LB-01	IGF2R	BLCA	Yes	No	No	No	No
TCGA-BT-A2LB-01	INF2	BLCA	Yes	No	No	No	No
TCGA-BT-A2LB-01	ING5	BLCA	Yes	No	No	No	No
TCGA-BT-A2LB-01	IQCE	BLCA	Yes	No	No	No	No
TCGA-BT-A2LB-01	ITSN1	BLCA	Yes	No	No	No	No
TCGA-BT-A2LB-01	KALRN	BLCA	Yes	No	No	No	No
TCGA-BT-A2LB-01	KCNAB2	BLCA	Yes	No	No	No	No
TCGA-BT-A2LB-01	KCNC4	BLCA	Yes	No	No	No	No
TCGA-BT-A2LB-01	KDM4C	BLCA	Yes	No	No	No	No
TCGA-BT-A2LB-01	KIAA0513	BLCA	Yes	No	No	No	No
TCGA-BT-A2LB-01	KIAA0586	BLCA	Yes	No	No	No	No
TCGA-BT-A2LB-01	KIAA1456	BLCA	Yes	No	No	No	No
TCGA-BT-A2LB-01	KIAA1841	BLCA	Yes	No	No	No	No
TCGA-BT-A2LB-01	KLF3	BLCA	Yes	No	No	No	No
TCGA-BT-A2LB-01	KMT2E	BLCA	Yes	No	No	No	No
TCGA-BT-A2LB-01	L3MBTL1	BLCA	Yes	No	No	No	No
TCGA-BT-A2LB-01	LACTB	BLCA	Yes	No	No	No	No
TCGA-BT-A2LB-01	LDB3	BLCA	Yes	No	No	No	No
TCGA-BT-A2LB-01	LETM2	BLCA	Yes	No	No	No	No
TCGA-BT-A2LB-01	LRR1	BLCA	Yes	No	No	No	No
TCGA-BT-A2LB-01	LRRC27	BLCA	Yes	No	No	No	No
TCGA-BT-A2LB-01	LRRC28	BLCA	Yes	No	No	No	No
TCGA-BT-A2LB-01	MAMDC2	BLCA	Yes	No	No	No	No
TCGA-BT-A2LB-01	MBD5	BLCA	Yes	No	No	No	No
TCGA-BT-A2LB-01	METTL2B	BLCA	Yes	No	No	No	No
TCGA-BT-A2LB-01	MPI	BLCA	Yes	No	No	No	No
TCGA-BT-A2LB-01	MPND	BLCA	Yes	No	No	No	No
TCGA-BT-A2LB-01	MRPL37	BLCA	Yes	No	No	No	No
TCGA-BT-A2LB-01	MTHFD2L	BLCA	Yes	No	No	No	No
TCGA-BT-A2LB-01	MVB12A	BLCA	Yes	No	No	No	No
TCGA-BT-A2LB-01	NADSYN1	BLCA	Yes	No	No	No	No
TCGA-BT-A2LB-01	NBEAL1	BLCA	Yes	No	No	No	No
TCGA-BT-A2LB-01	NDE1	BLCA	Yes	No	No	No	No
TCGA-BT-A2LB-01	NIPAL3	BLCA	Yes	No	No	No	No
TCGA-BT-A2LB-01	NIT1	BLCA	Yes	No	No	No	No
TCGA-BT-A2LB-01	NOL7	BLCA	Yes	No	No	No	No
TCGA-BT-A2LB-01	NOM1	BLCA	Yes	No	No	No	No
TCGA-BT-A2LB-01	NSUN7	BLCA	Yes	No	No	No	No
TCGA-BT-A2LB-01	NUP85	BLCA	Yes	No	No	No	No
TCGA-BT-A2LB-01	NXPE3	BLCA	Yes	No	No	No	No
TCGA-BT-A2LB-01	OXNAD1	BLCA	Yes	No	No	No	No
TCGA-BT-A2LB-01	PABPC1L	BLCA	Yes	No	No	No	No
TCGA-BT-A2LB-01	PACS2	BLCA	Yes	No	No	No	No
TCGA-BT-A2LB-01	PAPOLA	BLCA	Yes	No	No	No	No
TCGA-BT-A2LB-01	PATJ	BLCA	Yes	No	No	No	No
TCGA-BT-A2LB-01	PCGF3	BLCA	Yes	No	No	No	No
TCGA-BT-A2LB-01	PEX13	BLCA	Yes	No	No	No	No
TCGA-BT-A2LB-01	PHF20L1	BLCA	Yes	No	No	No	No
TCGA-BT-A2LB-01	PIP5K1B	BLCA	Yes	No	No	No	No
TCGA-BT-A2LB-01	PPARA	BLCA	Yes	No	No	No	No
TCGA-BT-A2LB-01	PPIE	BLCA	Yes	No	No	No	No
TCGA-BT-A2LB-01	PPP1R3F	BLCA	Yes	No	No	No	No
TCGA-BT-A2LB-01	PRKCE	BLCA	Yes	No	No	No	No
TCGA-BT-A2LB-01	PTPRJ	BLCA	Yes	No	No	No	No
TCGA-BT-A2LB-01	PVR	BLCA	Yes	No	No	No	No
TCGA-BT-A2LB-01	RAB3C	BLCA	Yes	No	No	No	No
TCGA-BT-A2LB-01	RAD51B	BLCA	Yes	No	No	Yes	No
TCGA-BT-A2LB-01	RALGPS1	BLCA	Yes	No	No	No	No
TCGA-BT-A2LB-01	RCOR3	BLCA	Yes	No	No	No	No
TCGA-BT-A2LB-01	RECK	BLCA	Yes	No	No	No	No
TCGA-BT-A2LB-01	RHBDD1	BLCA	Yes	No	No	No	No
TCGA-BT-A2LB-01	RMDN2	BLCA	Yes	No	No	No	No
TCGA-BT-A2LB-01	RPAP2	BLCA	Yes	No	No	No	No
TCGA-BT-A2LB-01	RRNAD1	BLCA	Yes	No	No	No	No
TCGA-BT-A2LB-01	SCLY	BLCA	Yes	No	No	No	No
TCGA-BT-A2LB-01	SDHAF4	BLCA	Yes	No	No	No	No
TCGA-BT-A2LB-01	SEC14L1	BLCA	Yes	No	No	No	No
TCGA-BT-A2LB-01	SH2D4A	BLCA	Yes	No	No	No	No
TCGA-BT-A2LB-01	SIRT5	BLCA	Yes	No	No	No	No
TCGA-BT-A2LB-01	SLC24A1	BLCA	Yes	No	No	No	No
TCGA-BT-A2LB-01	SLC35F1	BLCA	Yes	No	No	No	No
TCGA-BT-A2LB-01	SLF2	BLCA	Yes	No	No	No	No
TCGA-BT-A2LB-01	SP100	BLCA	Yes	No	No	No	No
TCGA-BT-A2LB-01	SPATA33	BLCA	Yes	No	No	No	No
TCGA-BT-A2LB-01	SPG7	BLCA	Yes	No	No	No	No
TCGA-BT-A2LB-01	TAF1B	BLCA	Yes	No	No	No	No
TCGA-BT-A2LB-01	TAF8	BLCA	Yes	No	No	No	No
TCGA-BT-A2LB-01	TANC1	BLCA	Yes	No	No	No	No
TCGA-BT-A2LB-01	TBCE	BLCA	Yes	No	No	No	No
TCGA-BT-A2LB-01	TCAIM	BLCA	Yes	No	No	No	No
TCGA-BT-A2LB-01	TDP1	BLCA	Yes	No	No	Yes	No
TCGA-BT-A2LB-01	THNSL2	BLCA	Yes	No	No	No	No
TCGA-BT-A2LB-01	TOM1L1	BLCA	Yes	No	No	No	No
TCGA-BT-A2LB-01	TOR1B	BLCA	Yes	No	No	No	No
TCGA-BT-A2LB-01	TRAPPC12	BLCA	Yes	No	No	No	No
TCGA-BT-A2LB-01	TRHDE	BLCA	Yes	No	No	No	No
TCGA-BT-A2LB-01	TRMT10B	BLCA	Yes	No	No	No	No
TCGA-BT-A2LB-01	UBE3B	BLCA	Yes	No	No	No	No
TCGA-BT-A2LB-01	VWA5A	BLCA	Yes	No	No	No	No
TCGA-BT-A2LB-01	WBP2NL	BLCA	Yes	No	No	No	No
TCGA-BT-A2LB-01	WRB-SH3BGR	BLCA	Yes	No	No	No	No
TCGA-BT-A2LB-01	XYLB	BLCA	Yes	No	No	No	No
TCGA-BT-A2LB-01	YAE1D1	BLCA	Yes	No	No	No	No
TCGA-BT-A2LB-01	ZCWPW2	BLCA	Yes	No	No	No	No
TCGA-BT-A2LB-01	ZFP2	BLCA	Yes	No	No	No	No
TCGA-BT-A2LB-01	ZNF264	BLCA	Yes	No	No	No	No
TCGA-BT-A2LB-01	ZNF273	BLCA	Yes	No	No	No	No
TCGA-BT-A2LB-01	ZNF283	BLCA	Yes	No	No	No	No
TCGA-BT-A2LB-01	ZNF346	BLCA	Yes	No	No	No	No
TCGA-BT-A2LB-01	ZNF431	BLCA	Yes	No	No	No	No
TCGA-BT-A2LB-01	ZNF493	BLCA	Yes	No	No	No	No
TCGA-BT-A2LB-01	ZNF528	BLCA	Yes	No	No	No	No
TCGA-BT-A2LB-01	ZNF540	BLCA	Yes	No	No	No	No
TCGA-BT-A2LB-01	ZNF568	BLCA	Yes	No	No	No	No
TCGA-BT-A2LB-01	ZNF596	BLCA	Yes	No	No	No	No
TCGA-BT-A2LB-01	ZNF678	BLCA	Yes	No	No	No	No
TCGA-BT-A2LB-01	ZNF718	BLCA	Yes	No	No	No	No
TCGA-BT-A2LB-01	ZNF813	BLCA	Yes	No	No	No	No
TCGA-BT-A2LB-01	ZNF862	BLCA	Yes	No	No	No	No
TCGA-BT-A2LB-01	ZNHIT3	BLCA	Yes	No	No	No	No
TCGA-BT-A2LB-01	ZSCAN2	BLCA	Yes	No	No	No	No
TCGA-BT-A2LB-01	ZSCAN25	BLCA	Yes	No	No	No	No
TCGA-CU-A0YN-01	ACAD8	BLCA	Yes	No	No	No	No
TCGA-CU-A0YN-01	ACO2	BLCA	Yes	No	No	No	No
TCGA-CU-A0YN-01	ACOT11	BLCA	Yes	No	No	No	No
TCGA-CU-A0YN-01	AIG1	BLCA	Yes	No	No	No	No
TCGA-CU-A0YN-01	ALG13	BLCA	Yes	No	No	No	No
TCGA-CU-A0YN-01	ANKRD12	BLCA	Yes	No	No	No	No
TCGA-CU-A0YN-01	ANKRD42	BLCA	Yes	No	No	No	No
TCGA-CU-A0YN-01	ARHGEF17	BLCA	Yes	No	No	No	No
TCGA-CU-A0YN-01	ASXL1	BLCA	Yes	No	No	No	Yes
TCGA-CU-A0YN-01	ATF7IP2	BLCA	Yes	No	No	No	No
TCGA-CU-A0YN-01	ATG10	BLCA	Yes	No	No	No	No
TCGA-CU-A0YN-01	ATG7	BLCA	Yes	No	No	No	No
TCGA-CU-A0YN-01	ATP11B	BLCA	Yes	No	No	No	No
TCGA-CU-A0YN-01	ATP2A2	BLCA	Yes	No	No	No	No
TCGA-CU-A0YN-01	ATP5S	BLCA	Yes	No	No	No	No
TCGA-CU-A0YN-01	BBS1	BLCA	Yes	No	No	No	No
TCGA-CU-A0YN-01	BCAP29	BLCA	Yes	No	No	No	No
TCGA-CU-A0YN-01	BICD1	BLCA	Yes	No	No	No	No
TCGA-CU-A0YN-01	BLZF1	BLCA	Yes	No	No	No	No
TCGA-CU-A0YN-01	BMP1	BLCA	Yes	No	No	No	No
TCGA-CU-A0YN-01	BMX	BLCA	Yes	No	No	No	No
TCGA-CU-A0YN-01	BPTF	BLCA	Yes	No	No	No	No
TCGA-CU-A0YN-01	BROX	BLCA	Yes	No	No	No	No
TCGA-CU-A0YN-01	BTN2A1	BLCA	Yes	No	No	No	No
TCGA-CU-A0YN-01	C16orf52	BLCA	Yes	No	No	No	No
TCGA-CU-A0YN-01	C16orf62	BLCA	Yes	No	No	No	No
TCGA-CU-A0YN-01	C20orf196	BLCA	Yes	No	No	No	No
TCGA-CU-A0YN-01	C6orf203	BLCA	Yes	No	No	No	No
TCGA-CU-A0YN-01	C8orf44	BLCA	Yes	No	No	No	No
TCGA-CU-A0YN-01	C9orf3	BLCA	Yes	No	No	No	No
TCGA-CU-A0YN-01	CAMK1D	BLCA	Yes	No	No	No	No
TCGA-CU-A0YN-01	CBWD2	BLCA	Yes	No	No	No	No
TCGA-CU-A0YN-01	CCDC30	BLCA	Yes	No	No	No	No
TCGA-CU-A0YN-01	CCDC66	BLCA	Yes	No	No	No	No
TCGA-CU-A0YN-01	CDC45	BLCA	Yes	No	No	No	No
TCGA-CU-A0YN-01	CELF2	BLCA	Yes	No	No	No	No
TCGA-CU-A0YN-01	CEP135	BLCA	Yes	No	No	No	No
TCGA-CU-A0YN-01	CEP68	BLCA	Yes	No	No	No	No
TCGA-CU-A0YN-01	CEP72	BLCA	Yes	No	No	No	No
TCGA-CU-A0YN-01	CEP78	BLCA	Yes	No	No	No	No
TCGA-CU-A0YN-01	CFLAR	BLCA	Yes	No	No	No	No
TCGA-CU-A0YN-01	CHD9	BLCA	Yes	No	No	No	No
TCGA-CU-A0YN-01	CLIP4	BLCA	Yes	No	No	No	No
TCGA-CU-A0YN-01	CLYBL	BLCA	Yes	No	No	No	No
TCGA-CU-A0YN-01	CNIH4	BLCA	Yes	No	No	No	No
TCGA-CU-A0YN-01	CNNM2	BLCA	Yes	No	No	No	No
TCGA-CU-A0YN-01	CNTLN	BLCA	Yes	No	No	No	No
TCGA-CU-A0YN-01	COL14A1	BLCA	Yes	No	No	No	No
TCGA-CU-A0YN-01	CPED1	BLCA	Yes	No	No	No	No
TCGA-CU-A0YN-01	CRELD1	BLCA	Yes	No	No	No	No
TCGA-CU-A0YN-01	CROT	BLCA	Yes	No	No	No	No
TCGA-CU-A0YN-01	CUL1	BLCA	Yes	No	No	No	No
TCGA-CU-A0YN-01	CYB5R4	BLCA	Yes	No	No	No	No
TCGA-CU-A0YN-01	CYFIP2	BLCA	Yes	No	No	No	No
TCGA-CU-A0YN-01	CYP27A1	BLCA	Yes	No	No	No	No
TCGA-CU-A0YN-01	DIAPH2	BLCA	Yes	No	No	No	No
TCGA-CU-A0YN-01	DLGAP2	BLCA	Yes	No	No	No	No
TCGA-CU-A0YN-01	DNAJB4	BLCA	Yes	No	No	No	No
TCGA-CU-A0YN-01	DPY19L4	BLCA	Yes	No	No	No	Yes
TCGA-CU-A0YN-01	DTNA	BLCA	Yes	No	No	No	No
TCGA-CU-A0YN-01	EFCAB2	BLCA	Yes	No	No	No	No
TCGA-CU-A0YN-01	EIF2B5	BLCA	Yes	No	No	No	No
TCGA-CU-A0YN-01	EIF4E2	BLCA	Yes	No	No	No	No
TCGA-CU-A0YN-01	ELAC1	BLCA	Yes	No	No	No	No
TCGA-CU-A0YN-01	ENDOV	BLCA	Yes	No	No	Yes	No
TCGA-CU-A0YN-01	EPB41L5	BLCA	Yes	No	No	No	No
TCGA-CU-A0YN-01	EXOC4	BLCA	Yes	No	No	No	No
TCGA-CU-A0YN-01	FAHD2A	BLCA	Yes	No	No	No	No
TCGA-CU-A0YN-01	FAM124A	BLCA	Yes	No	No	No	No
TCGA-CU-A0YN-01	FAM149A	BLCA	Yes	No	No	No	No
TCGA-CU-A0YN-01	FAM177A1	BLCA	Yes	No	No	No	No
TCGA-CU-A0YN-01	FAM198A	BLCA	Yes	No	No	No	No
TCGA-CU-A0YN-01	FAM20C	BLCA	Yes	No	No	No	No
TCGA-CU-A0YN-01	FAM228B	BLCA	Yes	No	No	No	No
TCGA-CU-A0YN-01	FAM234A	BLCA	Yes	No	No	No	No
TCGA-CU-A0YN-01	FAM81A	BLCA	Yes	No	No	No	No
TCGA-CU-A0YN-01	FAN1	BLCA	Yes	No	No	Yes	No
TCGA-CU-A0YN-01	FBLN1	BLCA	Yes	No	No	No	No
TCGA-CU-A0YN-01	FBLN7	BLCA	Yes	No	No	No	No
TCGA-CU-A0YN-01	FGFR1OP2	BLCA	Yes	No	No	No	No
TCGA-CU-A0YN-01	FMN2	BLCA	Yes	No	No	No	No
TCGA-CU-A0YN-01	FNDC3B	BLCA	Yes	No	No	No	No
TCGA-CU-A0YN-01	FPGT-TNNI3K	BLCA	Yes	No	No	No	No
TCGA-CU-A0YN-01	GARNL3	BLCA	Yes	No	No	No	No
TCGA-CU-A0YN-01	GCNT2	BLCA	Yes	No	No	No	No
TCGA-CU-A0YN-01	GGPS1	BLCA	Yes	No	No	No	No
TCGA-CU-A0YN-01	GIGYF2	BLCA	Yes	No	No	No	Yes
TCGA-CU-A0YN-01	GLDN	BLCA	Yes	No	No	No	No
TCGA-CU-A0YN-01	GLI1	BLCA	Yes	No	No	No	No
TCGA-CU-A0YN-01	GNAL	BLCA	Yes	No	No	No	No
TCGA-CU-A0YN-01	GPATCH2L	BLCA	Yes	No	No	No	No
TCGA-CU-A0YN-01	GPR146	BLCA	Yes	No	No	No	No
TCGA-CU-A0YN-01	GRHPR	BLCA	Yes	No	No	No	No
TCGA-CU-A0YN-01	GVQW3	BLCA	Yes	No	No	No	No
TCGA-CU-A0YN-01	HAT1	BLCA	Yes	No	No	No	No
TCGA-CU-A0YN-01	HECTD2	BLCA	Yes	No	No	No	No
TCGA-CU-A0YN-01	HEXB	BLCA	Yes	No	No	No	No
TCGA-CU-A0YN-01	HIST1H2BD	BLCA	Yes	No	No	No	No
TCGA-CU-A0YN-01	HNMT	BLCA	Yes	No	No	No	No
TCGA-CU-A0YN-01	HOXC4	BLCA	Yes	No	No	No	No
TCGA-CU-A0YN-01	HSBP1L1	BLCA	Yes	No	No	No	No
TCGA-CU-A0YN-01	HSPE1-MOB4	BLCA	Yes	No	No	No	No
TCGA-CU-A0YN-01	IFT43	BLCA	Yes	No	No	No	No
TCGA-CU-A0YN-01	IGF2R	BLCA	Yes	No	No	No	No
TCGA-CU-A0YN-01	ILF3	BLCA	Yes	No	No	No	No
TCGA-CU-A0YN-01	INF2	BLCA	Yes	No	No	No	No
TCGA-CU-A0YN-01	ING3	BLCA	Yes	No	No	No	No
TCGA-CU-A0YN-01	ING5	BLCA	Yes	No	No	No	No
TCGA-CU-A0YN-01	IQCE	BLCA	Yes	No	No	No	No
TCGA-CU-A0YN-01	IQCH	BLCA	Yes	No	No	No	No
TCGA-CU-A0YN-01	ITSN1	BLCA	Yes	No	No	No	No
TCGA-CU-A0YN-01	IVD	BLCA	Yes	No	No	No	No
TCGA-CU-A0YN-01	JHY	BLCA	Yes	No	No	No	No
TCGA-CU-A0YN-01	KCNC4	BLCA	Yes	No	No	No	No
TCGA-CU-A0YN-01	KDM4C	BLCA	Yes	No	No	No	No
TCGA-CU-A0YN-01	KIAA0141	BLCA	Yes	No	No	No	No
TCGA-CU-A0YN-01	KIAA0586	BLCA	Yes	No	No	No	No
TCGA-CU-A0YN-01	KIAA1841	BLCA	Yes	No	No	No	No
TCGA-CU-A0YN-01	KIZ	BLCA	Yes	No	No	No	No
TCGA-CU-A0YN-01	KLC1	BLCA	Yes	No	No	No	No
TCGA-CU-A0YN-01	KLHL18	BLCA	Yes	No	No	No	No
TCGA-CU-A0YN-01	KLHL7	BLCA	Yes	No	No	No	No
TCGA-CU-A0YN-01	KMT2E	BLCA	Yes	No	No	No	No
TCGA-CU-A0YN-01	LANCL2	BLCA	Yes	No	No	No	No
TCGA-CU-A0YN-01	LDB3	BLCA	Yes	No	No	No	No
TCGA-CU-A0YN-01	LEPR	BLCA	Yes	No	No	No	No
TCGA-CU-A0YN-01	LHPP	BLCA	Yes	No	No	No	No
TCGA-CU-A0YN-01	LIAS	BLCA	Yes	No	No	No	No
TCGA-CU-A0YN-01	LIMK2	BLCA	Yes	No	No	No	No
TCGA-CU-A0YN-01	LRRC61	BLCA	Yes	No	No	No	No
TCGA-CU-A0YN-01	LRRFIP1	BLCA	Yes	No	No	No	No
TCGA-CU-A0YN-01	MACROD2	BLCA	Yes	No	No	No	No
TCGA-CU-A0YN-01	2022-03-06	BLCA	Yes	No	No	No	No
TCGA-CU-A0YN-01	MBD5	BLCA	Yes	No	No	No	No
TCGA-CU-A0YN-01	MEGF8	BLCA	Yes	No	No	No	No
TCGA-CU-A0YN-01	METTL2B	BLCA	Yes	No	No	No	No
TCGA-CU-A0YN-01	MIB2	BLCA	Yes	No	No	No	No
TCGA-CU-A0YN-01	MIPOL1	BLCA	Yes	No	No	No	No
TCGA-CU-A0YN-01	MKL2	BLCA	Yes	No	No	No	No
TCGA-CU-A0YN-01	MPI	BLCA	Yes	No	No	No	No
TCGA-CU-A0YN-01	MRM3	BLCA	Yes	No	No	No	No
TCGA-CU-A0YN-01	MRPL37	BLCA	Yes	No	No	No	No
TCGA-CU-A0YN-01	MRS2	BLCA	Yes	No	No	No	No
TCGA-CU-A0YN-01	MTA3	BLCA	Yes	No	No	No	No
TCGA-CU-A0YN-01	MTHFD2L	BLCA	Yes	No	No	No	No
TCGA-CU-A0YN-01	MVB12A	BLCA	Yes	No	No	No	No
TCGA-CU-A0YN-01	MVP	BLCA	Yes	No	No	No	No
TCGA-CU-A0YN-01	NAALADL2	BLCA	Yes	No	No	No	No
TCGA-CU-A0YN-01	NADSYN1	BLCA	Yes	No	No	No	No
TCGA-CU-A0YN-01	NBEAL1	BLCA	Yes	No	No	No	No
TCGA-CU-A0YN-01	NBPF10	BLCA	Yes	No	No	No	No
TCGA-CU-A0YN-01	NDE1	BLCA	Yes	No	No	No	No
TCGA-CU-A0YN-01	NDST1	BLCA	Yes	No	No	No	No
TCGA-CU-A0YN-01	NECAP2	BLCA	Yes	No	No	No	No
TCGA-CU-A0YN-01	NFASC	BLCA	Yes	No	No	No	No
TCGA-CU-A0YN-01	NFE2L3	BLCA	Yes	No	No	No	No
TCGA-CU-A0YN-01	NHLRC3	BLCA	Yes	No	No	No	No
TCGA-CU-A0YN-01	NIF3L1	BLCA	Yes	No	No	No	No
TCGA-CU-A0YN-01	NIPBL	BLCA	Yes	No	No	Yes	Yes
TCGA-CU-A0YN-01	NISCH	BLCA	Yes	No	No	No	No
TCGA-CU-A0YN-01	NME1-NME2	BLCA	Yes	No	No	No	No
TCGA-CU-A0YN-01	NPM1	BLCA	Yes	No	No	Yes	Yes
TCGA-CU-A0YN-01	NSMCE2	BLCA	Yes	No	No	No	No
TCGA-CU-A0YN-01	NSUN7	BLCA	Yes	No	No	No	No
TCGA-CU-A0YN-01	NTNG1	BLCA	Yes	No	No	No	No
TCGA-CU-A0YN-01	NUB1	BLCA	Yes	No	No	No	No
TCGA-CU-A0YN-01	NUDT15	BLCA	Yes	No	No	No	No
TCGA-CU-A0YN-01	NUP85	BLCA	Yes	No	No	No	No
TCGA-CU-A0YN-01	NXPE3	BLCA	Yes	No	No	No	No
TCGA-CU-A0YN-01	OAS1	BLCA	Yes	No	No	No	No
TCGA-CU-A0YN-01	OGG1	BLCA	Yes	No	No	Yes	No
TCGA-CU-A0YN-01	OPTN	BLCA	Yes	No	No	No	No
TCGA-CU-A0YN-01	ORC3	BLCA	Yes	No	No	No	No
TCGA-CU-A0YN-01	PACS2	BLCA	Yes	No	No	No	No
TCGA-CU-A0YN-01	PAPOLA	BLCA	Yes	No	No	No	No
TCGA-CU-A0YN-01	PATJ	BLCA	Yes	No	No	No	No
TCGA-CU-A0YN-01	PCDH7	BLCA	Yes	No	No	No	Yes
TCGA-CU-A0YN-01	PCGF3	BLCA	Yes	No	No	No	No
TCGA-CU-A0YN-01	PCGF5	BLCA	Yes	No	No	No	No
TCGA-CU-A0YN-01	PCM1	BLCA	Yes	No	No	No	No
TCGA-CU-A0YN-01	PCMT1	BLCA	Yes	No	No	No	No
TCGA-CU-A0YN-01	PCNX1	BLCA	Yes	No	No	No	No
TCGA-CU-A0YN-01	PCTP	BLCA	Yes	No	No	No	No
TCGA-CU-A0YN-01	PDCD11	BLCA	Yes	No	No	No	No
TCGA-CU-A0YN-01	PDE9A	BLCA	Yes	No	No	No	No
TCGA-CU-A0YN-01	PDK2	BLCA	Yes	No	No	No	No
TCGA-CU-A0YN-01	PDK3	BLCA	Yes	No	No	No	No
TCGA-CU-A0YN-01	PDXK	BLCA	Yes	No	No	No	No
TCGA-CU-A0YN-01	PEX13	BLCA	Yes	No	No	No	No
TCGA-CU-A0YN-01	PHF20	BLCA	Yes	No	No	No	No
TCGA-CU-A0YN-01	PIBF1	BLCA	Yes	No	No	No	No
TCGA-CU-A0YN-01	PIGX	BLCA	Yes	No	No	No	No
TCGA-CU-A0YN-01	PIK3C3	BLCA	Yes	No	No	No	No
TCGA-CU-A0YN-01	PIP5K1B	BLCA	Yes	No	No	No	No
TCGA-CU-A0YN-01	PJVK	BLCA	Yes	No	No	No	No
TCGA-CU-A0YN-01	PLCB1	BLCA	Yes	No	No	No	No
TCGA-CU-A0YN-01	PLCB3	BLCA	Yes	No	No	No	No
TCGA-CU-A0YN-01	PPARA	BLCA	Yes	No	No	No	No
TCGA-CU-A0YN-01	PPFIBP2	BLCA	Yes	No	No	No	No
TCGA-CU-A0YN-01	PPIE	BLCA	Yes	No	No	No	No
TCGA-CU-A0YN-01	PPP1R3F	BLCA	Yes	No	No	No	No
TCGA-CU-A0YN-01	PPP1R7	BLCA	Yes	No	No	No	No
TCGA-CU-A0YN-01	PPP2R5C	BLCA	Yes	No	No	No	No
TCGA-CU-A0YN-01	PRKCE	BLCA	Yes	No	No	No	No
TCGA-CU-A0YN-01	PRKRIP1	BLCA	Yes	No	No	No	No
TCGA-CU-A0YN-01	PRMT2	BLCA	Yes	No	No	No	No
TCGA-CU-A0YN-01	PTPN4	BLCA	Yes	No	No	No	No
TCGA-CU-A0YN-01	RAD51B	BLCA	Yes	No	No	Yes	No
TCGA-CU-A0YN-01	RAD51C	BLCA	Yes	No	No	Yes	No
TCGA-CU-A0YN-01	RALGPS1	BLCA	Yes	No	No	No	No
TCGA-CU-A0YN-01	RBBP6	BLCA	Yes	No	No	No	Yes
TCGA-CU-A0YN-01	RBCK1	BLCA	Yes	No	No	No	No
TCGA-CU-A0YN-01	RCOR3	BLCA	Yes	No	No	No	No
TCGA-CU-A0YN-01	RECK	BLCA	Yes	No	No	No	No
TCGA-CU-A0YN-01	REEP3	BLCA	Yes	No	No	No	No
TCGA-CU-A0YN-01	RFC3	BLCA	Yes	No	No	Yes	No
TCGA-CU-A0YN-01	RGS12	BLCA	Yes	No	No	No	Yes
TCGA-CU-A0YN-01	RHBDD1	BLCA	Yes	No	No	No	No
TCGA-CU-A0YN-01	RNASE4	BLCA	Yes	No	No	No	No
TCGA-CU-A0YN-01	RNASEH2B	BLCA	Yes	No	No	No	No
TCGA-CU-A0YN-01	RNF165	BLCA	Yes	No	No	No	No
TCGA-CU-A0YN-01	RNF214	BLCA	Yes	No	No	No	No
TCGA-CU-A0YN-01	RPAP2	BLCA	Yes	No	No	No	No
TCGA-CU-A0YN-01	RPP30	BLCA	Yes	No	No	No	No
TCGA-CU-A0YN-01	RYR2	BLCA	Yes	No	No	No	No
TCGA-CU-A0YN-01	SARS	BLCA	Yes	No	No	No	No
TCGA-CU-A0YN-01	SCLY	BLCA	Yes	No	No	No	No
TCGA-CU-A0YN-01	SDCCAG8	BLCA	Yes	No	No	No	No
TCGA-CU-A0YN-01	SEC22A	BLCA	Yes	No	No	No	Yes
TCGA-CU-A0YN-01	SETMAR	BLCA	Yes	No	No	No	No
TCGA-CU-A0YN-01	SHISA6	BLCA	Yes	No	No	No	No
TCGA-CU-A0YN-01	SIN3B	BLCA	Yes	No	No	No	No
TCGA-CU-A0YN-01	SLC30A9	BLCA	Yes	No	No	Yes	No
TCGA-CU-A0YN-01	SLC35A3	BLCA	Yes	No	No	No	No
TCGA-CU-A0YN-01	SLC35F1	BLCA	Yes	No	No	No	No
TCGA-CU-A0YN-01	SLC44A1	BLCA	Yes	No	No	No	No
TCGA-CU-A0YN-01	SLF2	BLCA	Yes	No	No	No	No
TCGA-CU-A0YN-01	SMAD6	BLCA	Yes	No	No	No	No
TCGA-CU-A0YN-01	SNX1	BLCA	Yes	No	No	No	No
TCGA-CU-A0YN-01	SNX24	BLCA	Yes	No	No	No	No
TCGA-CU-A0YN-01	SP2	BLCA	Yes	No	No	No	No
TCGA-CU-A0YN-01	SPEG	BLCA	Yes	No	No	No	No
TCGA-CU-A0YN-01	SPG7	BLCA	Yes	No	No	No	No
TCGA-CU-A0YN-01	SPTBN1	BLCA	Yes	No	No	No	No
TCGA-CU-A0YN-01	SRSF11	BLCA	Yes	No	No	No	Yes
[truncated: 418,719+ more rows]

## Sheet: S4C
Table S4C: Number of samples containing DDR genes that are truncated by IPA, TR or both. TR: truncating mutations.
gene_symbol	IPA_total	TR_total	IPA_TR_total
ABL1	24	0	0
ABRAXAS1	89	0	0
ALKBH1	31	0	0
ALKBH3	26	0	0
APEX1	0	1	0
APEX2	0	1	0
APLF	148	0	0
ASCC1	53	0	0
ASCC2	39	1	1
ASCC3	84	2	0
ATM	83	3	0
ATR	0	2	0
ATRIP	25	0	0
BACH1	72	0	0
BRCA1	3	2	0
BRCA2	1	2	0
BRCC3	16	0	0
BRIP1	11	0	0
CCNO	0	1	0
CHD1L	142	0	0
CHEK1	123	0	0
CHEK2	116	0	0
CSNK1E	243	0	0
CUL4B	0	2	0
DCLRE1A	0	1	0
DCLRE1C	129	0	0
DDB1	0	2	0
DDX1	27	0	0
DNA2	84	0	0
DOT1L	33	0	0
EID3	0	1	0
ENDOV	390	0	0
ERCC1	184	0	0
ERCC2	13	0	0
ERCC3	0	1	0
ERCC4	280	0	0
ERCC6	153	0	1
ERCC6L2	229	0	0
ERCC8	288	0	0
EYA1	0	1	0
EYA3	29	0	0
FAAP20	302	0	0
FAN1	222	0	0
FANCA	273	0	0
FANCB	21	1	0
FANCC	109	0	0
FANCD2	45	0	0
FANCE	0	1	0
FANCF	0	1	0
FANCI	352	0	2
FANCL	1	0	0
FANCM	77	3	1
FBXO6	1	1	0
FTO	0	1	0
GTF2H1	155	1	1
GTF2H3	16	0	0
HINFP	1	0	0
HMGA1	21	0	0
HMGA2	22	0	0
HUS1	114	0	0
HUWE1	0	2	0
IGHMBP2	35	1	0
INO80	0	1	0
LIG1	50	1	0
LIG3	39	1	0
LIG4	7	0	0
MBD4	0	1	0
MEN1	0	3	0
MGME1	14	0	0
MLH1	64	1	0
MLH3	0	1	0
MNAT1	2	1	0
MND1	13	0	0
MRE11	1	0	0
MSH2	33	1	0
MSH3	4	0	0
MSH4	4	3	0
MSH6	0	1	0
MUS81	5	0	0
NCOA6	83	0	1
NIPBL	101	1	0
NPM1	127	0	0
NSMCE1	3	0	0
NSMCE4A	1	0	0
OGG1	320	1	0
ORAOV1	116	0	0
PALB2	0	2	0
PAPD7	0	1	0
PARP2	0	1	0
PARP3	0	1	0
PARP4	79	0	0
PARP9	35	1	0
PDS5A	169	0	1
PDS5B	0	1	0
PMS1	93	1	0
POLA1	31	0	0
POLD3	47	0	0
POLE2	70	0	0
POLG2	93	0	0
POLH	31	0	0
POLI	74	0	1
POLL	45	0	0
POLN	187	0	0
PRKDC	78	5	0
PSME4	6	2	0
RAD18	0	2	0
RAD21	0	1	0
RAD23B	6	0	0
RAD50	133	0	0
RAD51	12	0	0
RAD51AP1	9	0	0
RAD51B	425	0	0
RAD51C	139	0	0
RAD9B	129	0	0
RBBP8	0	1	0
RECQL	153	0	0
RECQL5	299	1	0
RFC2	58	0	0
RFC3	273	0	0
RFC5	0	2	0
RHNO1	5	0	0
RMI1	0	1	0
RNASEH2A	19	0	0
RPA1	75	0	0
RPS3	188	0	0
SETD2	92	10	2
SETX	52	1	0
SLC30A9	217	0	0
SLX4	0	1	0
SMC1A	55	2	0
SMG1	168	1	0
SMUG1	36	0	0
SUMO1	1	1	0
TDG	0	1	0
TDP1	129	0	0
TDP2	15	0	0
TICRR	1	0	0
TMEM189-UBE2V1	128	0	0
TNKS1BP1	0	1	0
TOP3A	3	0	0
TOPBP1	104	0	0
TP53	5	32	4
TRIP13	72	0	0
TRRAP	52	0	0
UBA52	1	1	0
UBB	0	1	0
UBC	0	1	0
UBE2B	4	0	0
UBE2V2	1	0	0
UIMC1	159	0	0
UNG	14	0	0
USP1	11	0	0
USP3	0	1	0
USP45	215	0	0
USP47	42	1	1
UVRAG	10	1	0
VCP	2	0	0
WDHD1	3	0	0
WDR33	186	1	0
WRN	9	2	0
WRNIP1	15	0	0
XPA	10	0	0
XRCC2	1	0	0
XRCC3	10	0	0
XRCC4	69	1	0
ZBTB1	45	0	0
ZRANB3	271	1	0

## Sheet: S4D
Table S4D: Number of samples carrying TSGs that are truncated by IPA, TR or both. TR: truncating mutations.
gene_symbol	IPA_total	TR_total	IPA_TR_total
KMT2C	162	5	5
TP53	5	32	4
PTEN	103	5	3
CASP8	186	1	3
SETD2	92	10	2
NSD1	110	3	2
RB1	43	14	1
CDKN2A	8	10	1
NF1	137	7	1
KMT2A	84	5	1
FBXW7	64	4	1
NCOR1	157	3	1
FANCM	77	3	1
SPEN	62	3	1
SMAD4	4	3	1
CHD2	212	2	1
PTPRK	153	2	1
KDM5C	225	1	1
GIGYF2	213	1	1
SMAD2	188	1	1
AMBRA1	115	1	1
DEPDC5	56	1	1
NUP98	45	1	1
HNRNPD	242	0	1
SPATA6	225	0	1
SPRED1	176	0	1
GNPTAB	156	0	1
APC	0	21	0
ARID1A	0	18	0
FAT1	0	14	0
KMT2D	0	13	0
PBRM1	85	10	0
MAP3K1	0	7	0
RASA1	68	6	0
ZNF292	43	6	0
ARID2	0	6	0
EP300	0	6	0
NF2	6	5	0
MGA	1	5	0
HMCN1	0	5	0
TGFBR2	0	5	0
VHL	0	5	0
VPS13A	176	4	0
YLPM1	134	4	0
NOTCH2	114	4	0
CCAR1	67	4	0
SMARCA4	52	4	0
KCNT2	48	4	0
BCOR	4	4	0
BRWD3	1	4	0
ARHGAP35	0	4	0
BAP1	0	4	0
HERC1	0	4	0
PIK3R1	0	4	0
SOX9	0	4	0
ATRX	171	3	0
MBD1	156	3	0
ATM	83	3	0
STAG2	75	3	0
ASXL2	60	3	0
SMARCA1	32	3	0
GGNBP2	18	3	0
THRAP3	15	3	0
ADAMTS19	2	3	0
JMJD1C	2	3	0
AMER1	0	3	0
AMOT	0	3	0
CSNK2A1	0	3	0
CTCF	0	3	0
KANSL1	0	3	0
KEAP1	0	3	0
MAGED1	0	3	0
MEN1	0	3	0
NAA25	0	3	0
NOTCH1	0	3	0
RIMS2	0	3	0
RNF43	0	3	0
RXRB	0	3	0
TRIP12	0	3	0
TTC18	0	3	0
USP9X	0	3	0
ASXL1	189	2	0
ABCA10	126	2	0
STK11	74	2	0
TAOK1	53	2	0
TP53BP1	14	2	0
MAP3K4	13	2	0
RUNX1	11	2	0
TET2	10	2	0
TCF12	4	2	0
BRCA1	3	2	0
SIN3A	3	2	0
RNF111	2	2	0
BMPR2	1	2	0
BRCA2	1	2	0
ARHGAP5	0	2	0
ATAD2	0	2	0
ATR	0	2	0
BIRC6	0	2	0
BRD7	0	2	0
CDH1	0	2	0
CHD8	0	2	0
HNF1A	0	2	0
KDM3B	0	2	0
KMT2B	0	2	0
MAP2K4	0	2	0
MYO6	0	2	0
PABPC3	0	2	0
SESTD1	0	2	0
TBL1XR1	0	2	0
TEX11	0	2	0
USP28	0	2	0
CCDC88A	245	1	0
RGS12	241	1	0
PLEKHA6	204	1	0
SFPQ	203	1	0
WDR33	186	1	0
RBBP6	179	1	0
PNISR	166	1	0
TMPO	141	1	0
ANKRD46	135	1	0
NIPBL	101	1	0
MED23	100	1	0
CD58	82	1	0
ZMYM3	79	1	0
ZMYM4	77	1	0
COL4A2	75	1	0
TNIK	75	1	0
RAPGEF6	66	1	0
CREBBP	59	1	0
CDKN1B	57	1	0
PRPF40A	57	1	0
ZC3H13	53	1	0
THUMPD3	45	1	0
UBR5	44	1	0
SMC4	25	1	0
ZFP36L1	25	1	0
ACVR2A	23	1	0
AJUBA	21	1	0
DENND6A	20	1	0
CLGN	16	1	0
PTCH1	16	1	0
GSE1	14	1	0
PRRC2C	11	1	0
RPL5	11	1	0
DDX3X	9	1	0
AFF4	6	1	0
CCDC38	6	1	0
LARP4B	6	1	0
CDK12	5	1	0
IWS1	4	1	0
ARID1B	1	1	0
RBM26	1	1	0
WAC	1	1	0
WWC2	1	1	0
ACVR1B	0	1	0
ANO3	0	1	0
B2M	0	1	0
BRE	0	1	0
CDKN1A	0	1	0
COL8A2	0	1	0
CPEB2	0	1	0
CRIPAK	0	1	0
CUL3	0	1	0
DAAM1	0	1	0
DOPEY1	0	1	0
DUSP16	0	1	0
DYRK1A	0	1	0
EIF2AK3	0	1	0
EPHA2	0	1	0
ERRFI1	0	1	0
GAPVD1	0	1	0
GATA3	0	1	0
GPR174	0	1	0
HAUS8	0	1	0
HLA-B	0	1	0
INO80	0	1	0
KDM6A	0	1	0
KIAA0907	0	1	0
LEMD2	0	1	0
MBD6	0	1	0
MLLT4	0	1	0
MORC4	0	1	0
MYO1B	0	1	0
NCOR2	0	1	0
PEX2	0	1	0
RAD21	0	1	0
RERE	0	1	0
RUFY2	0	1	0
SPSB2	0	1	0
TBC1D10C	0	1	0
TMEM30A	0	1	0
TNRC6B	0	1	0
UGT2A2	0	1	0
ZNRF3	0	1	0
FUBP1	419	0	0
PCDH7	271	0	0
SEC22A	212	0	0
PSIP1	208	0	0
HGF	195	0	0
RPL22	177	0	0
DPY19L4	156	0	0
ZNF318	156	0	0
NPM1	127	0	0
SPRED2	115	0	0
PUS7	113	0	0
SCRN3	95	0	0
BCL10	88	0	0
BTBD7	88	0	0
EPB41L4A	88	0	0
RBM15	87	0	0
LUC7L3	82	0	0
SRSF11	81	0	0
CHD3	76	0	0
CNOT3	75	0	0
LIMCH1	74	0	0
EMG1	57	0	0
CERK	51	0	0
CSDE1	50	0	0
AOAH	48	0	0
DNMT3A	38	0	0
PRKRA	34	0	0
SIK3	33	0	0
PPP3CC	23	0	0
APPBP2	22	0	0
MKRN1	20	0	0
STX7	19	0	0
PLEKHM3	18	0	0
SNRPN	16	0	0
UPF3B	16	0	0
ZC3H18	13	0	0
CACUL1	11	0	0
NEK9	11	0	0
WDR47	11	0	0
ZNF234	11	0	0
IFNGR2	9	0	0
CDC27	5	0	0
FOSL2	5	0	0
COQ9	1	0	0

## Sheet: S4E
Table S4E: List of tumor-enriched genes was associated with tumor mutation burdens.
gene_symbol	BLCA	BRCA	CESC	CHOL	COAD	ESCA	HNSC	KICH	KIRC	KIRP	LIHC	LUAD	LUSC	PAAD	PCPG	PRAD	READ	SARC	STAD	THCA	THYM	UCEC	ddr	num_pos	num_neg
ABCA8					pos		pos							pos	neg				pos			pos	N	5	1
ABCC4							pos	pos					pos			pos				neg			N	4	1
ABCD1							pos							pos									N	2	0
ABCD3					neg			pos															N	1	1
ABCF2		pos	pos		pos			neg				pos		pos	neg	pos						pos	N	7	2
ABLIM2		pos																				pos	N	2	0
ACAD8		pos					pos							pos								pos	N	4	0
ACO2					pos	pos	pos		neg							pos					neg	pos	N	5	2
ACOT8	pos				neg	pos						pos						neg			pos		N	4	2
ACTR3C		pos			neg		neg										pos		pos		pos	pos	N	5	2
ACYP2		pos			pos		pos									pos							N	4	0
ADARB2			pos	neg		pos	pos				pos			pos			pos	pos					N	7	1
ADCY3		pos												pos				pos					N	3	0
ADGRL2		pos			neg				pos										pos				N	3	1
ADGRL3														pos		pos					neg		N	2	1
ADK		pos								neg									neg	pos			N	2	2
AGO3		pos				pos			neg						pos	pos	pos			pos	pos		N	7	1
AHI1		pos										pos						neg	pos		neg		N	3	2
AHRR		pos			neg				neg			pos					neg	pos	neg	pos	pos		N	5	4
AIG1		pos						pos		pos	pos					pos							N	5	0
AK7																	pos				pos		N	2	0
AK9	pos				pos		pos		neg		neg	pos			pos			pos		neg			N	6	3
AKAP6		pos											pos										N	2	0
ALG2			pos									pos							neg				N	2	1
ALG9												pos		pos				pos				pos	N	4	0
ALPK1		pos			pos		pos	pos				pos				pos	neg					pos	N	7	1
AMY2B		pos														pos	pos				neg		N	3	1
APC1														pos		pos		pos					N	3	0
ANGEL2		pos					pos						pos				pos		pos				N	5	0
ANGPTL5					pos						pos						neg		pos		pos		N	4	1
ANKDD1A	pos					pos											pos		neg		pos		N	4	1
ANKEF1		pos		neg							neg	pos				pos		neg					N	3	3
ANKLE2							neg					pos											N	1	1
ANKRD10		pos			neg		neg					pos				pos		neg	pos		pos	pos	N	6	3
ANKRD12												pos							pos	pos	neg		N	3	1
ANKRD16	pos							pos		neg		pos		pos			neg	pos					N	5	2
ANKRD17							pos							pos		pos							N	3	0
ANKRD29		pos			neg																		N	1	1
ANKRD36C							pos		neg				pos						pos				N	3	1
ANKRD42		pos								neg										pos	pos		N	3	1
ANKRD50	pos											pos		pos						pos	pos	neg	N	5	1
ANKS6																			neg				N	0	1
ANTXR1	pos								neg			pos		pos					neg		pos	pos	N	5	2
ANXA11	pos				neg	pos	pos		neg	neg				pos		pos					pos	pos	N	7	3
AP1S2		pos																					N	1	0
AP3B2							pos									pos							N	2	0
POLN		pos	pos	pos	pos		pos			pos	pos	pos		pos	pos			pos	neg	pos	pos	pos	Y	14	1
APOPT1																			neg				N	0	1
ARHGEF17		pos							neg							pos		pos		pos			N	4	1
ARHGEF9					pos						pos		pos										N	3	0
ARL5A												pos		pos				neg				pos	N	3	1
ARMC2	pos	pos												pos				pos					N	4	0
ARMC8	pos	pos					pos			pos		pos							pos		pos		N	7	0
ARMC9												pos	pos	pos									N	3	0
ARSB		pos																					N	1	0
ASAH1		pos			pos		pos			neg	pos			pos		pos	neg				pos	pos	N	8	2
ASXL1		pos					pos			neg		pos		pos		pos						pos	N	6	1
ATAD5					pos						pos	pos				pos		pos					N	5	0
ATG10		pos										pos				pos							N	3	0
ATG7											pos				pos						pos		N	3	0
ATP11B		pos			pos		pos		neg												pos	pos	N	5	1
ATP2A2	neg	neg									pos		neg			pos		neg	pos	pos			N	4	4
ATP5S												pos	pos			neg			pos	pos		pos	N	5	1
ATPAF1		pos				neg											pos	pos	neg				N	3	2
ATRX														pos									N	1	0
ATXN1							pos	pos	neg					pos	pos			neg			pos		N	5	2
ATXN2					neg				pos			pos								pos			N	3	1
AUNIP		pos			pos	pos										pos			pos		pos		N	6	0
AZI2				neg																			N	0	1
B4GALNT3		neg					neg					pos		pos				pos					N	3	2
B9D1		pos					pos					pos	pos						neg		pos		N	5	1
BBS1												pos					neg	neg				pos	N	2	2
BBS7	pos		pos						neg	neg	pos	pos	pos	pos		pos	neg		pos				N	8	3
BBS9									pos			pos		pos									N	3	0
BCAP29		neg			neg		pos					pos					neg		pos		pos		N	4	3
BCCIP		pos						neg				pos	neg							pos	pos	pos	N	5	2
BCL10	pos	pos					neg									pos	neg		pos	neg	pos		N	5	3
BCL2		pos			neg				neg	neg			neg	pos	neg						pos		N	3	5
BEND6		pos		pos			pos					pos				pos					pos		N	6	0
BET1		neg			neg		pos					pos							neg		neg	neg	N	2	5
BICD1		pos	pos		neg				pos	neg		pos	neg	neg	pos	pos			pos	pos	pos	pos	N	10	4
BLZF1										neg													N	0	1
BMP1	pos				neg		pos					pos									neg		N	3	2
BMX		pos																			neg		N	1	1
BNIP2		pos																					N	1	0
BORCS8		pos				neg											neg						N	1	2
BPHL															pos	pos					pos		N	3	0
BPTF	pos	pos					pos			neg		pos				pos				pos		pos	N	7	1
BRAF											neg					pos							N	1	1
BROX										neg						pos							N	1	1
BRWD1		pos											pos							neg			N	2	1
BTD									neg							neg			neg		neg		N	0	4
BTN2A1													pos			pos				pos	pos		N	4	0
BUB1B-PAK6		pos										pos											N	2	0
C11orf49	pos										pos							pos					N	3	0
C11orf70		pos										pos										neg	N	2	1
C16orf46		pos										pos	pos	pos						pos	pos	pos	N	7	0
C16orf52		pos									pos										pos	pos	N	4	0
C1QTNF3	neg								neg														N	0	2
C21orf58		pos	pos		pos	pos	pos					pos		pos	neg	pos	pos		pos	neg	pos	pos	N	12	2
C21orf59-TCP10L	pos	pos														pos							N	3	0
C22orf34									neg														N	0	1
C2CD2												pos		pos			neg	pos			pos	pos	N	5	1
C2CD3		pos										pos			neg	pos	pos		neg				N	4	2
C2orf27A		pos				pos						pos		neg		pos			neg	pos	pos	neg	N	6	3
C5orf24	neg	pos			neg	pos	pos		pos		pos		pos				neg					pos	N	7	3
C6orf203							pos																N	1	0
C7orf49	pos				pos	pos				neg		pos				pos	pos						N	6	1
C8orf44																		neg		pos			N	1	1
C8orf44-SGK3	pos	pos										pos									pos		N	4	0
C8orf76		pos	neg						neg	neg												pos	N	2	3
C9orf3		pos								neg	pos	pos	pos	pos			neg						N	5	2
CAC2D1	pos					pos										pos		pos					N	4	0
CAMK1D					pos								pos	pos									N	3	0
CAMSAP2		pos																					N	1	0
CAPS2		pos									neg	neg	pos	pos		pos			pos	pos			N	6	2
CASK					neg									pos				pos					N	2	1
CASS4														pos				pos				pos	N	3	0
CBWD1		pos			neg						pos			pos									N	3	1
CBWD2														pos									N	1	0
CBX5	neg	pos	neg						neg		pos		pos	pos							pos		N	5	3
CC2D2A	pos			pos			pos			neg											neg		N	3	2
CCDC138	pos	pos			pos			pos	neg	neg	pos	pos		pos		pos	pos	neg	pos		pos	pos	N	12	3
CCDC169-SOHLH2		pos					pos		pos				pos	pos		pos			pos				N	7	0
CCDC171					neg																		N	0	1
CCDC30	pos	pos			neg	neg	pos		pos		pos	pos				pos		pos	neg				N	8	3
CCDC40		pos									pos	pos	neg									neg	N	3	2
CCDC50															neg								N	0	1
CCDC60													pos				neg				pos		N	2	1
CCDC66	pos										pos	pos									pos		N	4	0
CCDC88A							pos			neg		pos							pos				N	3	1
CCSER1		pos											pos	pos		pos							N	4	0
CD163L1																		neg	neg				N	0	2
CD96						pos																	N	1	0
CDADC1					neg									pos		pos							N	2	1
CDC14B		pos	pos							neg		pos							pos		neg	pos	N	5	2
CDC23										neg					pos	pos				pos			N	3	1
CDC45		pos														pos			pos			pos	N	4	0
CDCA3				pos				pos										neg					N	2	1
CDH23		pos								neg		pos				pos							N	3	1
CDK19		neg					neg			neg			pos		pos	pos	pos		pos	pos			N	6	3
CDKL3										neg						pos			neg				N	1	2
CDON						pos													pos				N	2	0
CEBPZOS	pos				neg						neg						neg						N	1	3
CELF2		pos					pos											pos	pos		pos		N	5	0
CENPU												pos							pos			pos	N	3	0
CEP120												pos	pos			pos			pos		pos		N	5	0
CEP68		pos									neg	pos							neg	neg		pos	N	3	3
CEP70		pos				neg						pos		pos		pos		neg			neg	pos	N	5	3
CEP72					pos							pos								pos	pos		N	4	0
CEP76							pos				pos	pos					neg		pos				N	4	1
CEP78		pos			neg							pos	neg						pos				N	3	2
CEP89		pos			neg							pos											N	2	1
CEP95	neg									neg			pos										N	1	2
CFAP44						pos					pos					pos			neg		pos		N	4	1
CFLAR	pos					neg		pos				pos	pos		neg							pos	N	5	2
CGREF1		neg																					N	0	1
CHD6						pos						pos	pos	pos		pos	pos						N	6	0
CHD9					neg	pos						pos		pos					pos				N	4	1
TMEM189-UBE2V1	pos	pos		pos	pos		pos							pos		neg		pos			pos	pos	Y	9	1
CHID1							pos						neg	pos			pos		neg	pos	pos	pos	N	6	2
CHR5		pos						pos						pos					pos			pos	N	5	0
CLCN6					pos	pos		pos		neg		pos		pos				neg	neg	pos	pos		N	7	3
CLEC16A		pos																			pos	pos	N	3	0
CLHC1		pos		pos							pos												N	3	0
CLIP4					pos			pos	neg	neg						pos		pos					N	4	2
CLK1	neg				pos			pos		neg	pos	pos								pos			N	5	2
CLYBL		neg			neg							pos				pos							N	2	2
CMBL	pos	pos					pos				pos		pos	pos		pos		neg			pos		N	8	1
CNDP2	neg												neg					pos					N	1	2
CNIH4		pos					pos										pos			neg			N	3	1
CNKSR2		pos						pos									pos						N	3	0
CNOT1		pos									neg	pos		pos									N	3	1
CNPY3-GNMT	pos	pos					pos		neg		pos	pos		pos								pos	N	7	1
CNTLN		pos			neg		pos		neg		pos			pos	pos				pos		pos		N	7	2
COA1	pos	pos			pos				neg					pos		pos							N	5	1
COG5							pos					pos									pos		N	3	0
COL14A1		pos	neg				pos				pos	pos											N	4	1
COQ2		pos				pos		pos	neg			pos		pos	pos	pos							N	7	1
COQ4										neg		pos						neg					N	1	2
CORO2B																					pos		N	1	0
COX11		pos							neg	pos										pos		pos	N	4	1
COX6C		pos							pos			pos											N	3	0
CP								pos							pos		neg						N	2	1
CPED1		neg											pos	pos		pos							N	3	1
CPT1A									pos	neg		pos							neg		neg		N	2	3
CRAT		pos					pos					pos											N	3	0
CRBN					neg	pos	neg			neg		pos		neg	neg		pos				neg	pos	N	4	6
CREB3L2								pos					pos			pos	pos						N	4	0
CRELD1				pos							pos								neg				N	2	1
CREM	neg		pos									pos						pos		pos			N	4	1
CRIM1					pos							pos				pos							N	3	0
CROT		neg		pos								pos							neg				N	2	2
CRTC3																							N	0	0
CRYZL1	pos				neg				neg			pos		pos					neg	pos	pos		N	5	3
CSMD1		pos			pos							pos			pos	pos					pos		N	6	0
CSNK1A1		pos																					N	1	0
RAD51B	neg	pos		pos	neg	pos		pos			pos	pos	pos	pos									Y	8	2
CSNK2A2		pos				pos				pos			pos							pos	pos	pos	N	7	0
CSTF3	neg	pos				neg			neg		pos		pos	pos								pos	N	5	3
CTN3		pos														pos							N	2	0
CUL4A		pos			neg										pos				pos				N	3	1
CUL9	pos	pos				pos		pos				pos		pos							pos		N	7	0
CYB561D2		pos					pos									pos						pos	N	4	0
CYB5R4		pos																					N	1	0
CYFIP2											neg												N	0	1
CYP27A1	neg	pos																pos					N	2	1
CYP39A1		pos										pos			neg	pos						neg	N	3	2
DBF4B		pos					pos							neg			neg		neg				N	2	3
DCBLD1											pos												N	1	0
DCP1B	neg	pos		pos	pos	neg	pos	pos	neg	pos	neg	pos		pos			pos	neg	pos	neg	pos		N	11	6
DCP2		pos										pos				pos			pos	neg			N	4	1
DCT					pos		pos													pos			N	3	0
DCUN1D5																neg							N	0	1
DDX31																pos							N	1	0
DDX49		neg							neg														N	0	2
DEAF1														pos							pos		N	2	0
DENND1A		pos					pos		neg			pos		pos					neg	pos	neg		N	5	3
DENND5B		pos			pos															neg	pos	pos	N	4	1
DEPTOR		pos	neg	neg			pos					pos		pos	pos		pos			pos	pos		N	8	2
DFFA		pos	neg	neg	neg	pos			pos			pos	pos	pos		pos	pos		pos	pos	neg	pos	N	11	4
DGKE	pos	pos					pos				pos	neg		pos		neg		pos		pos		pos	N	8	2
DHRS12			pos				pos									pos			pos	neg	pos	pos	N	6	1
DHX30		pos	pos		pos		neg																N	3	1
DIAPH2		neg							neg	neg	neg	pos									pos	pos	N	3	4
DIDO1	pos	pos					pos	pos		neg		pos	pos	pos		pos	neg	pos	pos		pos		N	11	2
DISP1							pos						pos										N	2	0
DLG2		pos					pos						pos										N	3	0
DLG5		pos					pos			neg				pos									N	3	1
DLGAP2							pos												neg	pos			N	2	1
DMKN																		neg	pos				N	1	1
DMXL1						pos						pos				pos							N	3	0
DH10													pos	pos									N	2	0
DH5		pos	pos																neg	pos		pos	N	4	1
DJB14										neg	pos					pos		pos	neg				N	3	2
DJB4		pos			neg		pos					pos		pos		pos							N	5	1
DNHD1	pos	pos												pos							pos	pos	N	5	0
DNPEP		pos			neg											pos							N	2	1
DONSON									pos											pos			N	2	0
DPP9		pos			neg		pos									pos					pos		N	4	1
DPY19L4					pos									pos			pos			pos	pos		N	5	0
DRAM2							pos	pos								pos						pos	N	4	0
DSCR3		pos					pos					neg		pos					neg				N	3	2
DST							pos						pos			pos					pos		N	4	0
DT		pos											neg			pos					pos	neg	N	3	2
DTNB		pos			neg		pos	pos					pos	pos	neg	pos	neg	pos					N	7	3
DTWD1					neg		pos									pos							N	2	1
DYNC2LI1												pos							pos				N	2	0
DZIP1		pos										pos							neg				N	2	1
EFCAB11		pos					pos		pos					pos				pos			neg	neg	N	5	2
EFCAB2		pos				neg				neg		neg		pos				pos	neg			pos	N	4	4
EFHC2				neg	neg			pos			pos			pos									N	3	2
EGFR												pos				pos						pos	N	3	0
EGLN3		pos																	pos				N	2	0
EIF2AK2		neg														pos							N	1	1
EIF2B3		pos			neg			pos									neg	pos	pos		pos		N	5	2
EIF4E2	pos	pos				neg						pos			pos	pos					pos	pos	N	7	1
ELF2		pos											pos					pos		pos	pos	pos	N	6	0
ELOVL6					pos		pos						neg				neg					pos	N	3	2
ELP6	neg	pos							neg							pos	neg		neg		pos		N	3	4
EH	neg															pos			neg				N	1	2
ENDOV							pos	pos				pos	pos			pos		pos	neg		pos		Y	7	1
EPB41L5				pos			pos		neg	pos		pos		pos	neg		neg	neg	neg	neg	pos	pos	N	7	6
EPS15L1	pos	pos			pos		pos	pos	pos	neg	pos	pos								pos		pos	N	10	1
ERAP1		pos	pos	pos		pos		pos	pos			pos										pos	N	8	0
ERCC6L2		pos						pos		neg	pos		pos	pos		pos						pos	Y	7	1
ERCC8			pos			neg						pos	pos			pos			neg	pos	pos	pos	Y	7	2
NPM1					pos						pos	pos	pos	pos				pos			pos		Y	7	0
ERICH1		neg		pos			pos				neg	pos		pos		pos	pos				pos		N	7	2
ETV5					neg							pos			neg					pos			N	2	2
ETV7											pos											neg	N	1	1
EXD3		pos			neg		pos	pos	neg			pos		pos							pos	pos	N	7	2
EXOSC3		pos									pos					pos							N	3	0
CSNK1E								neg			pos	pos		pos		pos	pos			pos			Y	6	1
FAAH2					pos						pos	pos				pos					pos		N	5	0
FAHD2A		pos					pos					pos						pos			pos		N	5	0
FAM104B		pos			neg									pos						pos			N	3	1
FAM120B														pos		pos		neg		pos	pos		N	4	1
FAM120C		pos						pos						pos		pos				pos	pos		N	6	0
FAM122B		pos										pos									pos		N	3	0
FAM124A		pos			neg	pos	pos			neg		pos						pos	neg		pos		N	6	3
FAM149A					pos													pos			pos	pos	N	4	0
FAM172A		pos			pos	pos					pos			pos		neg			neg				N	5	2
FAM177A1	neg	pos												pos			pos		pos	pos	pos		N	6	1
FAM185A	neg	pos			neg					neg		pos				pos					pos	pos	N	5	3
FAM189A1														pos							neg		N	1	1
FAM198A					neg									pos		pos			pos		pos		N	4	1
FAM20C	neg	pos					pos	pos	neg	neg	pos	pos				pos			neg	neg			N	6	5
FAM228B	pos	pos								pos					neg							pos	N	4	1
FAM234A												pos									pos	pos	N	3	0
FAM47E-STBD1		pos													neg								N	1	1
ERCC4	pos	pos			pos							pos		neg		pos		neg	neg		pos		Y	6	3
USP45		pos									pos	pos				pos					pos	pos	Y	6	0
GTF2H1		pos						pos				pos		neg		pos			pos				Y	5	1
FARP1		pos						pos								pos							N	3	0
FARP2										neg		pos	pos										N	2	1
FBLN1					neg	pos		pos		neg		pos									neg	neg	N	3	4
FBXL14		pos			pos		pos							pos					pos	pos			N	6	0
FBXO10																pos						neg	N	1	1
FBXO11		pos					pos														neg		N	2	1
FBXO3	pos	pos			pos	neg	pos			neg	neg				pos	pos	neg		neg	pos	pos	pos	N	9	5
FBXO36		neg			neg					pos											pos	neg	N	2	3
FGFR1OP2		pos					pos							pos		pos			pos	neg			N	5	1
FIG4							pos						neg				pos		pos				N	3	1
FILIP1		pos												pos		pos					pos		N	4	0
FLAD1												pos				pos						pos	N	3	0
FLCN								neg	neg			pos				pos					pos	neg	N	3	3
FMN2		neg		pos																			N	1	1
FNBP1		neg									pos	pos	pos			neg		pos		pos	pos	pos	N	7	2
FOXK1		pos					pos					pos											N	3	0
FPGT-TNNI3K	neg	pos			pos	pos	neg	pos		neg	pos	pos		pos		pos				pos	pos	pos	N	11	3
FUBP1	pos	pos			pos	neg			neg			pos	pos	pos		pos	neg	pos	neg		pos	pos	N	10	4
FUT10		pos										pos		pos					neg			pos	N	4	1
FXR1	pos			pos	pos									pos									N	4	0
GABPB2		pos									neg	pos											N	2	1
GALNT18	pos	pos						neg						pos		pos			pos		neg		N	5	2
GARNL3		pos			pos			neg					neg	pos			neg				neg		N	3	4
GAS2		pos										pos		pos		pos			pos				N	5	0
GATS							neg					pos				pos	pos						N	3	1
GDAP2		pos	neg		neg			neg		neg		pos		pos		pos		neg					N	4	5
GFOD1		pos		pos															pos				N	3	0
GGCX											pos					pos					neg		N	2	1
GGPS1		pos				pos	pos					pos		pos		pos			pos			pos	N	8	0
GIGYF2																					pos		N	1	0
GLDN					neg													pos	pos				N	2	1
GLIPR1L2											neg				pos	pos			pos		neg	pos	N	4	2
GL		neg			pos						pos	pos			pos	pos			neg		neg		N	5	3
GOLGA3					pos	neg	neg		neg		pos	pos		pos		pos			pos	pos			N	7	3
GOSR2		pos						pos	neg			pos	neg	neg					neg		pos	pos	N	5	4
GPATCH2					neg	pos						pos	pos	pos	neg	pos	pos				pos		N	7	2
GPATCH2L					neg				neg		pos	pos		pos		pos		pos	pos		pos	pos	N	8	2
GPC6																				pos			N	1	0
GPR146	neg	pos					pos		neg									neg	pos		pos		N	4	3
GPSM2		pos					neg					pos			pos						pos		N	4	1
GRAP2		pos							neg	neg						pos			neg				N	2	3
GRHPR														pos									N	1	0
GRIN2A												pos				pos							N	2	0
GRM7										neg											pos		N	1	1
GTDC1						pos													pos				N	2	0
GTF2E2		pos						pos				pos	pos	pos		pos							N	6	0
RAD51C		pos							neg	neg	neg		pos	pos						pos	pos		Y	5	3
GVQW3		pos					pos			neg									neg		pos		N	3	2
H2AFV	pos	pos			pos	neg		pos		neg	neg	pos		pos	pos	pos	neg	pos	pos	pos	pos	pos	N	13	4
HAT1						pos			neg					pos						neg		neg	N	2	3
HBS1L		pos							pos							pos		neg	pos			pos	N	5	1
HDAC4					neg											pos							N	1	1
HEATR1	pos	neg				pos										pos		neg					N	3	2
HEATR5A		pos			neg					neg													N	1	2
HECTD2		pos																					N	1	0
HEXB									neg		pos	pos	neg	neg		neg		pos			pos		N	4	4
HGF	pos						pos					pos			neg			pos					N	4	1
HIP1R		pos			neg							pos											N	2	1
HIST1H2BD		pos			pos		pos									pos				pos			N	5	0
HNMT		pos				pos													pos	neg			N	3	1
HNRNPA3	neg	pos	pos		pos	neg						pos		pos	pos	pos				neg	pos		N	8	3
HNRNPD																						pos	N	1	0
HNRNPDL												pos				pos	neg						N	2	1
HNRNPLL	pos	pos					pos						pos						pos		neg	pos	N	6	1
HOMEZ		pos							neg			pos				neg							N	2	2
HOXC4	neg	pos			pos															pos	pos		N	4	1
HPS1	neg	pos			pos	pos				pos	neg	pos	pos					neg			neg	pos	N	7	4
HS3ST1		pos								neg	neg	pos		pos									N	3	2
HS3ST3B1					neg																pos		N	1	1
HSF5		pos							neg	pos	neg										pos	pos	N	4	2
HSPA12A	pos	pos	pos		pos		pos	neg	neg	neg		pos	pos		neg		pos		neg	neg	pos		N	9	6
HSPE1-MOB4						neg			pos	neg	pos	pos	pos	pos		pos	pos				pos	neg	N	8	3
HTR2A		pos																				neg	N	1	1
RFC3	neg	pos								neg		pos		pos				neg	neg	neg	pos	pos	Y	5	5
ICE2		pos					pos		pos			pos			pos						pos		N	6	0
IDS																pos			pos				N	2	0
IFT43												neg										pos	N	1	1
IGF2R											pos	pos							pos				N	3	0
IKBIP		pos		pos	pos		pos					pos	pos			pos	neg		pos		pos	pos	N	10	1
IL18R1		pos									pos											pos	N	3	0
IL4I1												pos		pos									N	2	0
ILDR1		pos				neg				pos		pos				pos	pos				pos		N	6	1
ILF3						pos						pos							pos	pos			N	4	0
INF2														pos									N	1	0
ING3		neg							neg			neg		pos		pos							N	2	3
ING5	neg		neg		neg		pos					pos				neg						pos	N	3	4
IQCE							pos			neg		pos		pos									N	3	1
IQCG									neg	pos	neg						neg						N	1	3
IQCH	pos								neg			pos		pos								pos	N	4	1
ITFG1	pos					pos			neg	neg		neg		pos					pos		pos		N	5	3
ITGA1		pos			neg	pos	pos	pos	neg	neg	neg	pos	pos	pos	neg		neg		pos	neg	neg	neg	N	8	9
ITGB3BP	pos							pos						pos		pos						neg	N	4	1
ITSN1												pos	neg										N	1	1
JHY			pos		neg							pos		pos									N	3	1
KATNBL1			pos																				N	1	0
KBTBD3					neg																		N	0	1
KCNC4							pos									pos					pos		N	3	0
KCNIP3		pos					pos				neg	pos		pos					pos			pos	N	6	1
KCNMA1		pos	pos				pos	pos	neg	neg		pos	pos								pos		N	7	2
KCNMB3						pos				neg	pos	pos											N	3	1
KCTD1		pos	pos			neg	pos									pos					pos		N	5	1
KCTD2																pos			neg	pos		pos	N	3	1
KCTD3		neg																	pos				N	1	1
KDM4C										neg													N	0	1
KDM5C					pos		pos		neg														N	2	1
KHDC1		pos					pos					pos		pos		pos	neg			pos		pos	N	7	1
KIAA0141		pos	pos				pos					pos	pos	pos		pos	pos					pos	N	9	0
KIAA0232							pos					pos		pos		pos							N	4	0
KIAA0513		neg			pos							pos				pos						neg	N	3	2
KIAA0586		pos									pos					pos		pos			neg		N	4	1
KIAA0825	neg	pos			neg							neg						pos					N	2	3
KIAA1456											pos			pos									N	2	0
KIAA1841	neg	pos			neg	neg		pos	neg	neg	pos	pos		pos		pos		pos			neg	pos	N	8	6
KIAA2026	pos	pos																			neg		N	2	1
KIDINS220								neg															N	0	1
KIF13A		pos							neg							pos	pos	neg			pos	pos	N	5	2
KIZ																pos						pos	N	2	0
KLC1														pos									N	1	0
KLF3					pos	pos						pos										pos	N	4	0
KLHL18		pos			pos							pos							neg			pos	N	4	1
KLHL24											pos	pos						pos			pos		N	4	0
KLHL36	pos				pos											pos					pos	neg	N	4	1
KLHL7		pos	pos		pos		pos	pos	neg					pos		pos						pos	N	8	1
KMT2E												pos					neg		pos		pos	pos	N	4	1
KMT5B										neg	pos	pos							pos			pos	N	4	1
KRTCAP3																	neg				neg		N	0	2
L3MBTL1	pos													pos			pos	pos	pos	pos			N	6	0
LACTB		pos			neg	pos										pos					pos	pos	N	5	1
LAMP2		pos			pos					pos	pos	neg	neg	pos		pos					pos		N	7	2
LANCL2		pos		pos								pos		pos		pos						pos	N	6	0
LARP1										neg		neg		neg	neg	pos				pos			N	2	4
LARP6									neg														N	0	1
LATS2		pos								pos													N	2	0
LDB3																pos							N	1	0
LEPR		pos					pos		neg										pos			pos	N	4	1
LEPROT						pos	pos														pos	pos	N	4	0
LETM2		pos								neg						pos	neg				pos		N	3	2
LHPP			pos									pos					neg						N	2	1
LIMK2		pos			neg						pos	pos		pos									N	4	1
LMBR1	pos	pos			pos	neg						pos				pos	pos		neg			pos	N	7	2
LRCH3		pos							neg	pos													N	2	1
LRRC27		pos	pos	pos	neg					pos		pos		pos	neg				pos			pos	N	8	2
LRRC28		pos					neg							pos		pos							N	3	1
LRRC6	pos																						N	1	0
LRRC61																							N	0	0
LRRFIP1					pos							pos	neg	pos							pos		N	4	1
LY75	pos	pos							neg													pos	N	3	1
LY75-CD302		pos					pos															pos	N	3	0
LYRM1		pos				pos						pos				pos							N	4	0
LYST	pos	pos	pos				pos				pos	pos		pos		pos	neg	neg	pos				N	9	2
MACROD2		pos						pos	neg		pos					pos		pos					N	5	1
MAMDC2					neg					neg									pos				N	1	2
MAP3K15																	pos						N	1	0
MAP3K8	neg	pos					pos		neg			pos		pos									N	4	2
MAP7D3														pos		pos				pos	pos		N	4	0
MAPK9		pos														pos					pos		N	3	0
MAPKAP1		pos																				pos	N	2	0
2022-03-06		pos																					N	1	0
MARVELD3		pos			pos							pos	pos			pos					pos		N	6	0
MATR3										neg	neg						neg	pos					N	1	3
MBD5	pos	pos	pos		pos	pos	pos		neg			pos	pos	pos		pos			neg	pos	pos	pos	N	13	2
MBP										neg			neg	pos									N	1	2
MCPH1					pos																	pos	N	2	0
MEGF8		pos			pos	pos			neg				pos										N	4	1
METTL21A											pos		pos			pos					pos	pos	N	5	0
METTL2B	neg							pos										neg					N	1	2
MFAP3L		pos			neg		pos									pos					pos		N	4	1
MINDY4				neg						neg	pos	pos									pos		N	3	2
MIPOL1														pos		pos						pos	N	3	0
MKL2			neg											pos		pos					pos	pos	N	4	1
MLXIP					neg												neg					pos	N	1	2
MMS22L	pos							neg							pos	pos			pos		pos		N	5	1
MORN1	pos	pos		neg	pos	pos			neg	neg	pos	pos	pos	pos		pos	pos	neg		pos			N	11	4
MPI	pos	pos								neg		pos							neg		pos	pos	N	5	2
MPND		pos											pos										N	2	0
MPP3		pos			neg											pos		pos				pos	N	4	1
MRM3	pos											pos				pos		pos			pos	pos	N	6	0
MROH1		pos						pos				pos											N	3	0
MRPL37					pos				neg			pos		pos		pos					pos		N	5	1
MRPS6												neg											N	0	1
MRS2		pos			pos				neg							pos						pos	N	4	1
MSTO1		pos										pos					neg						N	2	1
MTA3		neg			neg				neg		neg	pos				pos						pos	N	3	4
MTERF4		pos	pos		neg	pos	pos		pos		pos	pos	neg		neg	pos		pos	pos	neg	pos		N	11	4
MTHFD2L		pos	pos		neg	neg	pos		pos		neg	pos	pos	pos	pos	pos	neg	pos	pos		pos	pos	N	13	4
MTIF2							pos					pos								neg	pos		N	3	1
MTRF1		pos	pos			pos																	N	3	0
MUM1		pos	neg									pos											N	2	1
MVB12A		neg														pos				neg			N	1	2
MVP		pos					pos			neg							pos						N	3	1
MXD4	pos	pos			neg														pos	pos	pos	pos	N	6	1
MYO19					pos				neg	neg				pos							neg	neg	N	2	4
MYO5A							pos	pos					pos						neg				N	3	1
N4BP2L1	pos									neg		pos				pos					pos		N	4	1
AA		neg				neg												pos		pos			N	2	2
ALADL2	pos					pos				neg	pos	pos									neg		N	4	2
DSYN1		pos				pos			neg			pos					pos		neg		neg		N	4	3
NBEAL1					pos						pos								neg				N	2	1
NBPF1		pos			neg						pos	pos		neg			pos		pos				N	5	2
NBPF3					pos					neg													N	1	1
NCAPG2	pos				pos		pos							pos				neg	pos			pos	N	6	1
NDE1										neg						pos		pos				pos	N	3	1
NDST1		pos								neg		neg		neg									N	1	3
NEDD8-MDP1		pos		pos	pos	pos			neg			pos				pos					pos		N	7	1
NEDD9							pos	pos			pos					pos			pos	pos			N	6	0
NEGR1					neg								pos								pos		N	2	1
NEK1		pos														pos					pos		N	3	0
NFASC		pos				pos											neg		neg		pos		N	3	2
NFE2L3		pos			pos		pos																N	3	0
NFKBID							pos	pos								neg		neg	pos				N	3	2
NHLRC3		pos	pos				pos				pos		pos	pos									N	6	0
NIN					pos				neg			pos								pos	pos	pos	N	5	1
NIPAL3		pos								neg					pos	pos		pos			neg		N	4	2
SLC30A9		pos					neg					pos						pos	pos	pos			Y	5	1
NISCH	neg	pos					pos			neg		pos		pos		pos				pos			N	6	2
NIT1		pos			pos	neg										pos				pos			N	4	1
NLRC5		pos	pos			pos																	N	3	0
NME1-NME2		pos			pos		neg	pos	neg			pos							neg		pos	pos	N	6	3
NNT								pos				pos	pos		pos				neg		pos		N	5	1
NOL4L		pos	pos											pos		pos		pos			neg		N	5	1
NOM1											pos	pos		pos									N	3	0
NOP56																						neg	N	0	1
NOVA1			pos		neg	pos			pos					pos						pos			N	5	1
NPEPL1		pos	neg		neg						pos					pos						pos	N	4	2
NPHP1											pos	pos		pos					pos				N	4	0
UIMC1		pos				pos					pos			pos							pos		Y	5	0
NR2C1		pos													pos	pos							N	3	0
NRG1		pos			neg	pos	pos					pos				pos					pos	pos	N	7	1
NSMCE2											pos											neg	N	1	1
NSUN7		pos			neg	neg		pos		neg		neg		pos		pos			pos	pos	pos		N	7	4
NTNG1														pos									N	1	0
NUB1		pos			neg		pos	pos				pos		pos		pos			pos		pos		N	8	1
NUDT15						neg																	N	0	1
NUDT3											pos												N	1	0
NUP85										neg						pos							N	1	1
NUP88		pos					pos				pos					pos		neg	pos	pos		pos	N	7	1
NXPE3						pos							pos					neg				pos	N	3	1
OAS1		pos																	pos			pos	N	3	0
OAS2		pos														pos			pos				N	3	0
OBSL1		pos			neg							pos	pos	neg							neg		N	3	3
OCIAD1																					pos		N	1	0
OGFOD3		pos										pos			pos								N	3	0
ZRANB3		pos				pos	pos								pos						neg	pos	Y	5	1
OPHN1		pos																					N	1	0
OPTN									pos										pos				N	2	0
OSCP1							pos			neg									pos				N	2	1
OXR1							pos									pos							N	2	0
PABPC1L		pos	pos			pos			pos					pos	pos				pos		pos		N	8	0
PACS2			pos									pos		pos			neg	pos			pos		N	5	1
PAIP2		pos			neg	pos					neg									pos			N	3	2
PAK3		neg						neg	pos		pos					pos				neg	pos		N	4	3
PARD3												pos			neg				pos		pos	pos	N	4	1
PARD6G							pos							pos					pos		neg		N	3	1
PATJ		pos			pos	neg			neg			pos		pos		pos			pos				N	6	2
PBX1										neg						pos							N	1	1
PCDH11X		neg							neg												pos	pos	N	2	2
PCDH11Y	pos				pos		pos								neg				pos			pos	N	5	1
PCDH7	pos	pos	pos		pos					neg	neg	pos	pos	pos		pos			pos	pos	pos	pos	N	12	2
PCDH9		pos																neg			pos	pos	N	3	1
PCGF3					neg	pos													neg	pos		pos	N	3	2
PCGF5												pos	pos				neg					pos	N	3	1
PCM1		pos			neg		neg						pos						pos				N	3	2
PCMT1	neg				pos		pos		pos														N	3	1
PCMTD1		pos								pos									pos		pos	pos	N	5	0
PCNX1		pos																					N	1	0
PCNX2		pos			pos		pos					pos		pos		pos		pos			pos		N	8	0
PCNX4								pos						neg				pos					N	2	1
PCTP	pos	pos					pos	pos						pos					pos		pos		N	7	0
PDCD11							pos						pos								pos		N	3	0
PDCD2		pos		pos			pos				neg	pos		pos				neg					N	5	2
PDE3A		neg														pos					pos		N	2	1
PDE4DIP		pos	neg	pos	neg	pos				pos		pos		pos	pos	pos		neg	neg	pos	pos	neg	N	10	5
PDE7A		pos									neg	pos		neg			pos					pos	N	4	2
PDE9A												pos		pos				neg	neg				N	2	2
PDK2		pos			neg							pos	pos	neg					neg	neg			N	3	4
PDK3		pos	pos																		pos		N	3	0
PDLIM7																	pos		pos				N	2	0
PEX13		pos	pos	pos					neg	pos			pos				neg	neg	pos		pos		N	7	3
PEX6	pos					pos	pos	pos				pos		pos		pos						pos	N	8	0
PFKFB2	pos	pos				pos						pos	neg										N	4	1
PGM3		pos	pos									pos	pos					pos		pos	pos		N	7	0
PHF19		pos												pos								pos	N	3	0
PHF20L1		pos	pos						pos				pos			pos							N	5	0
PHTF1		pos						pos	neg	neg					pos	pos	neg		pos	pos	pos	pos	N	8	3
PHTF2												pos	neg										N	1	1
PIBF1		pos		pos		pos						pos		pos					pos		pos		N	7	0
PIGX												pos		pos							pos		N	3	0
PIK3C3						neg						pos	pos										N	2	1
PIP5K1B	pos			pos					pos	neg										pos			N	4	1
PJVK					pos			pos													pos		N	3	0
PLA2G4C		pos			neg							pos	pos	pos				neg					N	4	2
PLA2R1								neg	neg	neg		pos	neg					pos			pos	pos	N	4	4
PLCB1												pos		pos		pos			pos				N	4	0
PLCB3												neg							pos		pos		N	2	1
PLD1	pos		pos		pos								pos						neg		neg		N	4	2
PML	neg				pos											neg	neg				neg		N	1	4
APLF						pos										pos			neg		pos	pos	Y	4	1
CHEK2	neg	pos				pos								pos		pos							Y	4	1
POLR1D												pos											N	1	0
POLR2F		pos									neg			pos									N	2	1
POU6F1	pos	pos							neg				pos	pos				pos			pos	pos	N	7	1
PPA2	pos				pos	neg						pos	pos		pos				neg		pos	pos	N	7	2
PPAN-P2RY11		pos					pos			neg	pos	neg		pos	neg	pos			pos				N	6	3
PPARA						pos	pos			neg		pos				pos		pos	pos	pos	pos		N	8	1
PPFIA1	pos						pos					pos		pos		pos					neg	pos	N	6	1
PPFIBP2	pos									pos	neg												N	2	1
PPIE		pos	pos			neg	pos					pos	pos	pos	pos	pos	neg	pos					N	9	2
PPP1R3F	pos	pos											pos	pos	neg				pos	pos	pos		N	7	1
PPP1R7											pos	pos	pos										N	3	0
PPP2R1B	pos		pos	neg	pos	pos		pos		pos	pos	pos	pos	pos		pos	pos	pos	pos	pos	pos	pos	N	17	1
PPP2R2B		pos					pos							pos									N	3	0
PPP2R5C		pos																			neg		N	1	1
PPP3CB		pos				pos					pos		pos					pos				pos	N	6	0
PPP4R3B									neg			pos						neg					N	1	2
PQLC2L							pos		neg			pos				pos				pos		pos	N	5	1
PRKAR1B												pos										neg	N	1	1
PRKCE		pos									pos	pos								neg	neg		N	3	2
PRKRIP1	pos			neg	pos							pos							pos				N	4	1
PRMT2		pos		neg	pos									pos			neg				pos	pos	N	5	2
PRR12																						neg	N	0	1
PRRC1										pos				pos		pos							N	3	0
PRTFDC1						pos		neg				pos								pos			N	3	1
PSIP1	pos	pos										pos		pos		pos		neg		pos			N	6	1
PSPC1							pos							pos									N	2	0
PTCHD4				neg		pos	pos								neg						pos		N	3	2
PTEN													neg										N	0	1
PTGR1			neg		pos				pos							pos			pos		pos		N	5	1
PTPN4									neg						neg		neg	neg				pos	N	1	4
PTPRJ		pos					pos											neg					N	2	1
PVR		pos										pos	pos	pos								pos	N	5	0
PYGL	pos	pos			pos							pos					pos		pos		pos	pos	N	8	0
RAB3C					neg		pos					pos				pos	neg	pos					N	4	2
RAB3GAP1		pos				pos										pos				pos			N	4	0
RABEP1							pos				pos			pos		pos		neg	pos	pos			N	6	1
RABGEF1	pos																				neg		N	1	1
FANCA				pos														neg	pos		pos	pos	Y	4	1
NIPBL								pos				pos		pos		pos							Y	4	0
TDP1	neg	pos							pos			pos							pos				Y	4	1
RADIL	pos	pos											pos										N	3	0
RALGPS1					pos							pos		pos							neg	pos	N	4	1
RANBP3L	neg											pos				pos					pos		N	3	1
RAPGEF3														pos			pos						N	2	0
RBCK1					pos					neg		pos				pos	pos					pos	N	5	1
RBFOX1		pos						pos															N	2	0
RBFOX2					pos							pos											N	2	0
RBM33								pos								pos			pos			pos	N	4	0
RBM39		pos		pos										pos					pos				N	4	0
RBM41		pos										pos				pos		pos			pos		N	5	0
RC3H2		pos					pos		neg			pos						neg			neg		N	3	3
RCOR3	pos	pos		pos									pos			pos	pos						N	6	0
RECK		pos			neg											pos			neg			neg	N	2	3
POLI		neg								neg		pos		pos	pos	neg			neg				Y	3	4
EYA3	pos				neg	pos												neg					Y	2	2
[truncated: 271 more rows]

[truncated: 5 more sheets: S5, S6, S7AB, S7C, S7DE]
